# Supplementary material for: Osteogenic Differentiation Potential of Mesenchymal Stem Cells Using Single Cell Multiomic Analysis
Source: MDPI journal article supplement (doi:10.3390/genes14101871), 2023-09-26
Supplement: s1 [file s1]

Table S1. Donor's age and sex information.

| Donor's number | Donor's age | Donor's gender |
|----------------|-------------|----------------|
| 1              | 37          | Male           |
| 2              | 36          | Male           |
| 3              | 25          | Male           |
| 4              | 24          | Female         |
