# Supplementary material for: Osteogenic Differentiation Potential of Mesenchymal Stem Cells Using Single Cell Multiomic Analysis
Source: Genes (Basel). 2023 Sep 26;14(10):1871. doi: 10.3390/genes14101871 (PMC10606235; doi:10.3390/genes14101871)
Supplement: Supplementary file 1 [file genes-14-01871-s001.zip › Table S2.xlsx]

## Sheet: Individual1_specific_network
TF	TG	corr	-log10P_TF	-log10P_TG	-log10P_Regulation	Fold	Activity	Score
BACH2	SLC38A4	-0.212976	2.61301	4.85653	5.60147	35.5863	0.345863	186.331
BACH2	BAIAP2L1	0.525626	2.61301	2.91938	5.60147	25.5995	0.245995	141.439
BACH2	ZIC4	0.698184	2.61301	4.17134	5.60147	18.1076	0.171076	132.05
CEBPA	KRT16	0.787458	4.22504	2.82907	5.60147	15.525	0.14525	118.892
BACH2	KLF2	0.746829	2.61301	3.41281	5.60147	16.8292	0.158292	99.3798
DLX6	INSC	0.477347	4.33859	5.0126	0.732584	20.8258	0.587107	92.9868
TCF7	SYT12	0.838312	4.32491	3.77174	5.60147	11.469	0.10469	91.9725
BACH2	HSH2D	0.786011	2.61301	5.15922	5.60147	12.2731	0.112731	82.121
NFATC1	PLXNA4	0.437561	3.8531	1.79421	5.60147	21.8459	0.208459	77.1642
BACH2	PAK3	0.379098	2.61301	2.94401	5.60147	21.1397	0.201397	69.5483
CEBPA	LYNX1	0.808905	4.22504	3.53108	5.60147	10.5019	0.0950187	67.455
NFATC1	C4orf51	0.517466	3.8531	5.15321	5.60147	10.9966	0.0999662	63.2681
HEY2	DLX6	0.524947	4.16271	4.94929	0.759947	14.0106	0.498252	57.3752
MAFB	GLIS1	0.676394	3.57308	2.9764	3.72779	3.66791	0.550865	54.1813
FOSB	HIVEP3	0.685618	1.54099	2.31402	5.60147	20.1222	0.191222	52.6944
TCF7	SLC25A37	0.680293	4.32491	2.81194	5.60147	9.94178	0.0894178	41.1972
RUNX3	TSPAN18	0.734316	4.38548	3.25695	0.624399	20.5917	0.291795	39.3498
AR	PIEZO2	0.736648	1.92918	3.28299	5.60147	12.7654	0.117654	39.2503
BACH2	SLC25A37	0.334867	2.61301	2.81194	5.60147	17.3783	0.163783	39.2281
FOSB	HOXC6	-0.393433	1.54099	2.70229	5.60147	21.1179	0.201179	38.9887
RUNX3	PLXNA4	0.575933	4.38548	1.79421	5.60147	12.6932	0.116932	37.6763
MAFB	LAMA1	0.572316	3.57308	4.51861	0.877333	19.4571	0.235148	37.091
RUNX3	EN1	0.653664	4.38548	4.48242	1.32511	5.68833	0.382086	37.0067
SIX1	NALCN	0.572506	2.03212	2.54066	5.60147	15.3444	0.143444	36.4427
BACH2	TAF3	-0.277428	2.61301	1.03082	5.60147	29.1214	0.281214	34.2788
BACH2	BMPR2	0.545605	2.61301	3.33504	5.60147	11.8344	0.108344	34.1486
NFATC2	QPCT	0.701486	3.38455	4.54336	5.60147	7.74696	0.0674696	31.5819
FOXC1	RARRES1	0.814349	0.909762	4.80977	0.937363	30.4597	0.297726	30.291
TCF7	TNIP3	0.621646	4.32491	5.16725	5.60147	6.53688	0.0553688	28.1655
FOXD1	RARRES1	0.274295	1.27663	4.80977	1.02572	40.6442	0.399352	28.0408
HOXC10	CSMD2	0.520859	3.52125	4.93132	5.60147	7.77563	0.0677563	26.6913
DLX5	SHROOM3	0.572781	3.70822	3.38863	5.60147	8.49834	0.0749834	25.6909
FOSB	PIEZO2	0.637383	1.54099	3.28299	5.60147	12.4279	0.114279	25.6528
DLX5	INSC	0.260366	3.70822	5.0126	0.689608	15.2461	0.502576	25.5727
MAFB	KRT16	0.837242	3.57308	2.82907	5.60147	7.67159	0.0667159	24.2636
CEBPD	KRT16	0.566942	2.72658	2.82907	5.60147	10.371	0.09371	23.8072
FOXD1	EN1	0.592967	1.27663	4.48242	2.29393	3.7186	0.813923	23.5587
RUNX3	HOXC6	-0.166319	4.38548	2.70229	5.60147	14.8491	0.138491	22.7048
BACH2	LRRC8E	0.739248	2.61301	4.99396	5.60147	6.98804	0.0598804	22.6109
DLX3	INSC	0.177905	4.29274	5.0126	0.730562	19.7062	0.386939	21.3249
TCF7L2	SYT12	0.707505	3.11301	3.77174	5.60147	7.21559	0.0621559	20.8693
RUNX3	FGF14	0.40427	4.38548	2.96769	5.60147	8.8186	0.078186	20.3206
RUNX3	C4orf51	0.44962	4.38548	5.15321	5.60147	6.37563	0.0537563	19.5072
CEBPD	LYNX1	0.668272	2.72658	3.53108	5.60147	7.86807	0.0686807	19.4753
NFE2	ZIC1	0.971381	4.45978	1.47999	0.46096	19.5361	0.334644	19.3218
RUNX3	SKIDA1	0.563064	4.38548	5.14447	5.60147	5.72109	0.0472109	19.2193
TCF7	TAF3	-0.711039	4.32491	1.03082	5.60147	10.7066	0.0970661	18.4534
DLX5	GFRA1	0.588165	3.70822	1.7564	5.60147	9.71526	0.0871526	18.1688
GATA2	EN1	0.906511	4.45262	4.48242	1.01431	4.83059	0.20468	18.1445
BACH2	ZNF429	0.158334	2.61301	4.47445	5.60147	13.7041	0.127041	18.053
MAFB	C7orf69	-0.280233	3.57308	4.09339	4.64494	1.49516	0.59389	16.9051
TCF7L2	PIEZO2	0.725823	3.11301	3.28299	5.60147	6.85656	0.0585656	16.6852
DLX5	LAMA1	0.668354	3.70822	4.51861	5.60147	5.65793	0.0465793	16.5322
DLX3	ANKRD35	0.739003	4.29274	4.38505	0.475991	10.042	0.242064	16.0955
RUNX3	RAB40A	0.330179	4.38548	5.03876	5.60147	6.77577	0.0577577	15.9941
MAFB	INSC	0.215393	3.57308	5.0126	0.730253	17.5987	0.320819	15.9056
HOXB5	RARRES1	0.711448	3.41131	4.80977	0.975303	9.98046	0.139033	15.7978
RUNX2	MLC1	0.733223	0.72437	5.17329	5.60147	10.6105	0.096105	15.6945
DLX5	ANKRD35	0.788331	3.70822	4.38505	0.486556	8.36453	0.296123	15.4488
BACH2	SYT12	0.172058	2.61301	3.77174	5.60147	13.2439	0.122439	15.4027
TEF	ENKUR	0.633465	2.8919	3.97036	0.546254	12.5363	0.301734	15.0287
TEF	ACOT11	0.737348	2.8919	4.59847	4.20769	6.52352	0.055282	14.8792
RUNX3	SUPT4H1	0.787257	4.38548	4.02247	5.60147	4.86709	0.0386709	14.6414
MEF2B	TMEM182	0.7168	4.09053	4.63725	5.60147	4.89909	0.0389909	14.5485
FOSB	SYT12	0.441693	1.54099	3.77174	5.60147	10.5336	0.0953364	14.4412
BACH2	CCDC170	0.370761	2.61301	4.16762	5.60147	8.50153	0.0750153	14.4235
BACH2	ZIC1	0.870276	2.61301	1.47999	5.60147	9.24702	0.0824702	14.3767
FOXD1	SLC38A4	-0.251989	1.27663	4.85653	5.60147	13.3237	0.123237	14.3696
FOSB	MESP1	0.765145	1.54099	5.02753	5.60147	7.06865	0.0606865	14.2439
DLX3	GFRA1	0.557412	4.29274	1.7564	5.60147	8.22237	0.0722237	13.9802
BACH2	FRK	-0.19548	2.61301	4.50799	5.60147	10.7898	0.0978976	13.6243
FOXD1	PCED1A	0.878373	1.27663	4.34191	5.60147	7.51548	0.0651548	13.3546
DLX1	CSMD2	0.574332	4.35323	4.93132	5.60147	4.91168	0.0391168	13.2688
TCF7	BMPR2	0.744958	4.32491	3.33504	5.60147	5.21185	0.0421185	13.2123
AR	MLC1	0.714108	1.92918	5.17329	5.60147	6.2665	0.052665	13.1751
AR	AKAP17A	-0.445971	1.92918	4.45929	5.60147	8.32182	0.0732182	13.0944
DLX5	PLAG1	0.735589	3.70822	1.95713	5.60147	7.12385	0.0612385	13.0455
CEBPB	KRT16	0.519974	2.71424	2.82907	5.60147	8.14723	0.0714723	13.0233
NFE2	SLC38A4	-0.124961	4.45978	4.85653	5.60147	9.77295	0.0877295	12.9983
SIX1	OSBPL6	-0.645354	2.03212	3.06029	5.60147	8.08237	0.0708237	12.8686
NFE2	KLF2	0.961661	4.45978	3.41281	1.0108	3.98625	0.21497	12.6781
SIX1	HOXC6	-0.272246	2.03212	2.70229	5.60147	12.7392	0.117392	12.5236
AR	ZSCAN5A	0.84188	1.92918	4.02492	5.60147	6.36283	0.0536283	12.4947
SIX1	ARMC1	0.836128	2.03212	3.86123	5.60147	6.32829	0.0532829	12.3915
DLX3	PLAG1	0.743695	4.29274	1.95713	5.60147	6.40973	0.0540973	12.1358
TCF7	CCDC170	0.676362	4.32491	4.16762	5.60147	4.72181	0.0372181	12.0007
NFE2	AMZ1	0.824732	4.45978	4.63595	0.855641	6.48235	0.126637	11.977
FOSB	ITGBL1	0.701546	1.54099	2.85324	5.60147	8.78709	0.0778709	11.8227
DLX3	LAMA1	0.620584	4.29274	4.51861	5.60147	4.71574	0.0371574	11.8151
SIX4	NALCN	0.49695	4.05726	2.54066	5.60147	6.92354	0.0592354	11.768
FOXD1	NR6A1	0.558301	1.27663	2.95546	5.60147	10.4789	0.0947885	11.7201
BACH2	SYNJ2	-0.332793	2.61301	5.23378	5.60147	7.27445	0.0627445	11.6361
NFE2	NRN1	0.944626	4.45978	4.5155	0.525696	3.18796	0.362075	11.5432
TCF7L2	RAD9A	0.942644	3.11301	3.4192	5.60147	5.05436	0.0405436	11.5171
SIX1	SPOCK1	0.897483	2.03212	1.97576	5.60147	8.05215	0.0705215	11.4617
FOSB	TUSC2	-0.439371	1.54099	4.29463	5.60147	8.87543	0.0787543	11.3848
FOXC1	EN1	0.872266	0.909762	4.48242	2.30185	3.35582	0.40522	11.1341
RUNX3	BOC	-0.605813	4.38548	2.51504	5.60147	5.97363	0.0497363	11.1203
TCF7	RAD9A	0.703136	4.32491	3.4192	5.60147	4.89005	0.0389005	11.0793
DLX5	TRABD2A	-0.291326	3.70822	5.02934	5.60147	6.53831	0.0553831	11.0205
NFE2	KCNK15	0.877696	4.45978	4.47178	0.461276	7.91345	0.172025	10.9915
HOXB8	ZIC1	0.826218	4.1156	1.47999	5.60147	6.75947	0.0575947	10.9745
NFE2	ZFHX3	0.854017	4.45978	3.1411	5.60147	4.57277	0.0357277	10.9483
BACH2	TBC1D7	0.748638	2.61301	4.44545	5.60147	5.2456	0.042456	10.8484
MAF	KRT16	0.823791	1.38103	2.82907	5.60147	8.26521	0.0726521	10.826
DLX5	SECISBP2L	0.634286	3.70822	3.75708	5.60147	5.20284	0.0420284	10.824
DLX2	INSC	0.408113	4.30221	5.0126	0.563988	11.1164	0.184119	10.1593
BACH2	CUL3	-0.145034	2.61301	4.29091	5.60147	11.0468	0.100468	10.1094
MAFB	CHST14	-0.518331	3.57308	4.49889	5.60147	5.1571	0.041571	10.0058
DLX3	SHROOM3	0.397627	4.29274	3.38863	5.60147	6.04836	0.0504836	9.89294
BACH2	DIRAS1	0.914169	2.61301	4.33331	3.61257	1.26635	0.203024	9.61401
FOSB	RAD9A	0.697688	1.54099	3.4192	5.60147	7.34765	0.0634765	9.60395
HOXB5	ENO4	0.688378	3.41131	4.79943	1.91633	7.14619	0.0617378	9.5287
AR	PITX2	-0.590703	1.92918	3.05551	2.5895	2.23261	0.46739	9.40878
NFE2	BMPR2	0.830057	4.45978	3.33504	5.60147	4.20538	0.0320538	9.32202
SIX1	SLC35F1	-0.125009	2.03212	1.5851	5.60147	20.7902	0.197902	9.28019
HOXB8	NALCN	0.459794	4.1156	2.54066	4.42954	7.05669	0.0606091	9.10834
MAFB	BID	-0.792011	3.57308	4.26852	0.711878	10.2522	0.103052	9.08511
EGR2	EN1	0.452867	3.58251	4.48242	0.770063	7.0915	0.228607	9.0787
CEBPB	LYNX1	0.579207	2.71424	3.53108	5.60147	5.91319	0.0491319	9.03394
HOXC10	OLFML1	-0.382694	3.52125	3.42037	5.60147	6.41456	0.0541456	8.96713
RFX1	KY	0.414668	3.91759	4.70562	5.60147	5.08364	0.0408364	8.88915
PRDM1	QPCT	0.917128	4.49923	4.54336	5.60147	3.45053	0.0245053	8.87957
RUNX3	ARMC1	0.755421	4.38548	3.86123	5.60147	4.04488	0.0304488	8.82489
AR	EN1	0.462295	1.92918	4.48242	1.26826	3.54822	0.485837	8.74006
BACH2	AKR1C3	-0.326517	2.61301	0.788456	5.60147	15.6405	0.146405	8.62844
FOSB	PLEKHM3	0.615423	1.54099	2.74609	5.60147	8.19111	0.0719111	8.59272
AR	SUPT4H1	0.702005	1.92918	4.02247	5.60147	5.80781	0.0480781	8.52056
DLX3	C8orf34	-0.376648	4.29274	0.804916	5.60147	11.2949	0.102949	8.47674
CEBPA	MFAP3L	0.797002	4.22504	4.20433	5.60147	3.796	0.02796	8.4169
FOSB	SLC38A4	-0.157515	1.54099	4.85653	5.60147	11.7807	0.107807	8.3862
BACH2	SLC37A2	0.376296	2.61301	5.15505	5.60147	5.92923	0.0492923	8.29819
AR	C15orf40	0.584176	1.92918	3.68354	5.60147	6.48749	0.0548749	8.27816
MAFB	TMEM158	-0.487311	3.57308	2.54125	5.60147	6.23675	0.0523675	8.09503
SIX1	SYT12	0.695603	2.03212	3.77174	5.60147	5.72588	0.0472588	8.0813
RUNX3	FIBIN	-0.355693	4.38548	4.15308	1.08392	8.55537	0.133621	8.02732
SIX1	AKAP17A	-0.403567	2.03212	4.45929	5.60147	6.74509	0.0574509	7.93813
BACH2	SNX32	-0.253946	2.61301	4.26126	5.60147	7.56138	0.0656138	7.85813
HOXB5	OSBPL6	-0.639539	3.41131	3.06029	5.60147	5.10243	0.0410243	7.82834
DLX6	TRABD2A	-0.251004	4.33859	5.02934	5.60147	5.5054	0.045054	7.60967
NFE2	SYNDIG1	0.705632	4.45978	1.31174	1.75812	6.26283	0.166131	7.55106
RFX1	PRKG1	-0.49546	3.91759	2.96644	5.60147	5.33212	0.0433212	7.45016
BACH2	UHRF1BP1	0.523219	2.61301	1.84699	5.60147	7.72987	0.0672987	7.35818
HOXA10	OMD	0.625759	1.02637	4.95586	5.60147	6.94166	0.0594166	7.35369
PRDM1	LAMA1	0.721268	4.49923	4.51861	5.60147	3.5199	0.025199	7.28543
MAFB	DLX6	0.267976	3.57308	4.94929	0.756417	7.69499	0.261661	7.21757
RUNX3	HTR7	-0.725663	4.38548	4.05307	2.29245	2.74048	0.0884981	7.17127
AR	SYT12	0.626351	1.92918	3.77174	0.95654	7.50815	0.218494	7.15166
TCF7	PIEZO2	0.348153	4.32491	3.28299	5.60147	5.60601	0.0460601	7.14986
MAF	LAMA1	0.420903	1.38103	4.51861	0.929575	13.8803	0.210049	7.11856
RUNX3	TAF3	-0.385838	4.38548	1.03082	5.60147	9.03731	0.0803731	7.09671
HOXB5	EN1	0.747594	3.41131	4.48242	0.899607	3.87785	0.177014	7.05912
DLX5	C4orf3	0.833007	3.70822	2.8231	5.60147	4.31032	0.0331032	6.96984
BACH2	PCDHGA12	-0.114398	2.61301	3.36693	5.60147	11.6046	0.106046	6.93781
AR	CDK15	0.31696	1.92918	4.60727	2.87591	2.19465	0.388663	6.91089
DLX6	TBX15	-0.42668	4.33859	2.23456	0.739787	14.0153	0.160873	6.89978
AR	TNIP3	0.575267	1.92918	5.16725	5.60147	5.16149	0.0416149	6.89967
NFE2	ZIC4	0.842958	4.45978	4.17134	5.60147	3.3371	0.023371	6.85082
RFX1	TUSC3	-0.596267	3.91759	3.09678	5.60147	4.60654	0.0360654	6.73191
NFE2	C8orf82	0.875684	4.45978	4.83271	5.60147	3.06808	0.0206808	6.70794
DLX5	FCHO2	0.761621	3.70822	1.78079	5.60147	5.39341	0.0439341	6.67551
AR	TUSC2	-0.341665	1.92918	4.29463	5.60147	7.00175	0.0600175	6.66324
BACH2	RNF14	0.381811	2.61301	4.09825	5.60147	5.88331	0.0488331	6.58
NFE2	RAB40A	0.327681	4.45978	5.03876	5.60147	4.48036	0.0348036	6.43171
EGR2	PITX2	-0.646913	3.58251	3.05551	0.778756	5.02097	0.231231	6.40252
HOXB5	GPM6B	-0.394351	3.41131	1.67921	5.60147	7.62942	0.0662942	6.39999
DLX2	PPP1R3E	0.420432	4.30221	4.63335	5.60147	4.20574	0.0320574	6.32931
BACH2	PPP1R3G	-0.313172	2.61301	5.06702	5.60147	5.70416	0.0470416	6.23235
AR	PRTG	0.32439	1.92918	4.54333	5.60147	6.77268	0.0577268	6.22665
NFATC1	IQSEC2	0.763797	3.8531	4.56105	5.60147	3.41378	0.0241378	6.19566
BACH2	LY6K	0.55629	2.61301	4.66392	2.58573	2.58418	0.136755	6.19501
DLX3	EVA1A	-0.634719	4.29274	2.2095	1.37837	6.53189	0.113973	6.17757
SIX1	IQSEC2	0.802482	2.03212	4.56105	5.60147	4.3776	0.033776	6.16022
TCF7	MESP1	0.533689	4.32491	5.02753	5.60147	3.61085	0.0261085	6.12791
RUNX3	RARRES1	0.335446	4.38548	4.80977	0.996326	8.28315	0.104481	6.10099
MAFB	NRCAM	-0.368205	3.57308	4.15085	5.60147	4.99322	0.0399322	6.09924
HOXA6	ENO4	0.563188	3.43908	4.79943	5.60147	3.94751	0.0294751	6.05853
TCF7L2	SLC25A37	0.457325	3.11301	2.81194	5.60147	5.7188	0.047188	6.05132
RUNX3	TUSC3	-0.490795	4.38548	3.09678	5.60147	4.53734	0.0353734	5.99247
DLX3	TRABD2A	-0.215208	4.29274	5.02934	5.60147	5.31637	0.0431637	5.97228
RUNX3	SPOCK1	0.882758	4.38548	1.97576	5.60147	4.24902	0.0324902	5.91476
BACH2	TBXA2R	0.841416	2.61301	5.13718	2.29929	2.14568	0.105836	5.89754
RUNX3	CMIP	0.44341	4.38548	2.73953	5.60147	4.96632	0.0396632	5.87793
AR	L3MBTL3	-0.392748	1.92918	4.0342	5.60147	6.36928	0.0536928	5.85534
CEBPA	QPCT	0.579158	4.22504	4.54336	5.60147	3.58712	0.0258712	5.77921
FOS	HIVEP3	0.676104	2.01181	2.31402	5.60147	6.24509	0.0524509	5.77513
GATA2	BHLHE41	0.92929	4.45262	3.60773	1.93462	3.5783	0.0554603	5.73132
HOXD9	OMD	0.592672	3.98373	4.95586	5.60147	3.48715	0.0248715	5.68456
DLX3	PTCH2	-0.351536	4.29274	4.33121	5.60147	4.46967	0.0346967	5.67778
AR	DLX6	0.250143	1.92918	4.94929	0.911006	7.9341	0.322941	5.57501
DLX5	GRIA1	0.50193	3.70822	4.57356	0.58176	6.8411	0.16452	5.57379
TCF7L2	MESP1	0.718225	3.11301	5.02753	5.60147	3.51013	0.0251013	5.54775
BACH2	BDKRB2	-0.372471	2.61301	2.6871	5.60147	6.66227	0.0566227	5.52627
RUNX3	NLRP10	-0.201743	4.38548	3.14044	2.16012	1.72639	0.53279	5.5205
EGR3	DLX6	0.145991	4.31292	4.94929	0.718942	9.7226	0.251483	5.47804
AR	PLEKHM3	0.518349	1.92918	2.74609	5.60147	6.47718	0.0547718	5.457
ATF6B	PLXNA4	0.404173	3.58055	1.79421	5.60147	6.5857	0.055857	5.35022
MAFB	BCO2	0.760757	3.57308	4.97801	5.60147	3.19338	0.0219338	5.30898
FOXD1	AKAP17A	-0.445877	1.27663	4.45929	5.60147	6.61815	0.0561815	5.28662
MAFG	LAMA1	0.783072	0.408594	4.51861	5.60147	8.56195	0.0756195	5.24334
BACH2	DDAH2	0.927588	2.61301	0.584072	5.60147	8.63179	0.0763179	5.22388
FOSB	TMCO4	0.486921	1.54099	3.47293	5.60147	6.48414	0.0548414	5.19061
CEBPD	QPCT	0.710601	2.72658	4.54336	5.60147	3.78207	0.0278207	5.18825
RUNX3	IQSEC2	0.671545	4.38548	4.56105	5.60147	3.16396	0.0216396	5.15156
BACH2	TMCO4	0.157492	2.61301	3.47293	5.60147	8.53203	0.0753203	5.14471
DLX6	SLC9B1	0.192271	4.33859	4.87199	5.60147	5.27828	0.0427828	5.14082
SIX4	SLC35F1	-0.156322	4.05726	1.5851	5.60147	10.0485	0.0904853	5.12026
NFATC1	PLCB4	0.540836	3.8531	2.84546	5.60147	4.45398	0.0345398	5.10974
RUNX3	FAM110A	0.771227	4.38548	4.5442	5.60147	2.98548	0.0198548	5.10313
AR	HTR7	-0.607086	1.92918	4.05307	1.98264	3.41933	0.158234	5.09204
AR	IQSEC2	0.40976	1.92918	4.56105	5.60147	5.51648	0.0451648	5.03188
NFATC1	BMPR2	0.704219	3.8531	3.33504	5.60147	3.68498	0.0268498	5.01532
MAF	INSC	0.133793	1.38103	5.0126	1.21524	14.0478	0.316864	5.01004
HOXA7	RARRES1	0.417768	2.95638	4.80977	1.25004	6.68203	0.0994484	4.93458
ZIC1	KATNAL2	-0.286729	1.10959	3.34172	5.60147	9.56246	0.0856247	4.87611
DLX5	C8orf34	-0.262876	3.70822	0.804916	5.60147	11.0114	0.100114	4.84511
BACH2	ANKRD13B	0.566561	2.61301	5.02903	5.60147	3.92709	0.0292709	4.79381
DLX3	DPT	0.574297	4.29274	5.06057	0.948059	4.19869	0.0954871	4.74204
RUNX3	CRYGS	0.802998	4.38548	5.07964	5.60147	2.73127	0.0173127	4.73801
MAFB	SDK2	0.266042	3.57308	5.16346	5.60147	4.67612	0.0367612	4.72621
TCF7L2	TNIP3	0.426815	3.11301	5.16725	5.60147	4.03984	0.0303984	4.72278
RFX1	ZSCAN5A	0.660883	3.91759	4.02492	5.60147	3.3857	0.023857	4.71484
BACH2	MOB2	-0.249114	2.61301	4.0811	5.60147	6.12536	0.0512536	4.67169
HOXA5	EN1	0.834468	1.91462	4.48242	3.74042	1.8826	0.092351	4.65719
BACH2	PPCDC	0.343507	2.61301	2.8334	5.60147	6.21897	0.0521897	4.6237
SOX11	CYP27C1	0.833681	4.4872	4.17933	0.777895	6.10262	0.0621063	4.60951
NFE2	ADAMTS9	0.885053	4.45978	3.60115	0.803868	5.51675	0.0728055	4.58941
TCF7	TCF7	1	4.32491	4.98428	0.91287	1.94054	0.11981	4.57514
BACH2	TRMT2B	-0.353102	2.61301	4.94438	5.60147	4.75591	0.0375591	4.56462
RUNX3	IL21R	0.489227	4.38548	4.14189	0.694644	3.10972	0.236178	4.53367
TEAD2	BNC1	0.764381	3.77835	4.47577	1.63453	3.40737	0.0619126	4.45728
JUNB	NALCN	0.605752	1.79628	2.54066	5.60147	5.87462	0.0487462	4.43443
BACH2	GYG2	0.84442	2.61301	4.9312	5.60147	3.22936	0.0222936	4.38786
CEBPA	INSC	0.33053	4.22504	5.0126	0.981864	6.27176	0.101648	4.38171
BACH2	RIC8B	0.121183	2.61301	3.18218	5.60147	9.32112	0.0832112	4.37785
TEAD2	MYH11	-0.618523	3.77835	4.85345	5.60147	3.16898	0.0216898	4.36702
DLX3	C4orf3	0.734415	4.29274	2.8231	5.60147	3.49611	0.0249611	4.35063
AR	HOXA10	0.833493	1.92918	2.23429	0.867245	2.70941	0.512886	4.32963
FOSB	SEMA5A	0.814289	1.54099	1.08534	5.60147	8.02594	0.0702594	4.30176
SIX1	FIBIN	-0.402931	2.03212	4.15308	2.72622	3.40359	0.136152	4.29609
BHLHE41	EN1	0.861674	3.15116	4.48242	0.739224	4.94714	0.0960203	4.27385
DLX3	PPP1R3E	0.302514	4.29274	4.63335	1.11789	8.44777	0.0750439	4.26414
NR3C1	ZNF793	0.541229	3.10809	4.90365	5.60147	3.5716	0.025716	4.24386
AR	HIVEP3	0.773273	1.92918	2.31402	0.664329	8.45275	0.218543	4.23633
AR	BHLHE41	0.739143	1.92918	3.60773	0.882469	3.67881	0.25218	4.21165
FOSB	PCDHGA12	-0.385266	1.54099	3.36693	5.60147	6.65077	0.0565077	4.20802
EGR2	CEP152	0.366976	3.58251	4.60479	5.60147	4.04376	0.0304376	4.17382
FOSB	L3MBTL3	-0.317372	1.54099	4.0342	5.60147	6.62353	0.0562353	4.1165
HOXB8	KCNK15	0.564523	4.1156	4.47178	5.60147	3.19993	0.0219993	4.0968
PRDM1	ZNF398	0.579562	4.49923	4.08191	5.60147	3.16853	0.0216853	4.09663
MAF	TMEM158	-0.500522	1.38103	2.54125	5.60147	6.94121	0.0594121	4.05775
SIX1	C8orf82	0.757962	2.03212	4.83271	5.60147	3.64652	0.0264652	4.02388
RUNX2	RAB40A	0.360328	0.72437	5.03876	5.60147	7.88165	0.0688165	3.99571
TCF7L2	RIC8B	0.712738	3.11301	3.18218	5.60147	3.71477	0.0271477	3.98844
TEAD2	CSMD2	0.705864	3.77835	4.93132	0.907407	4.84808	0.0689199	3.98753
RFX1	FAM71F1	0.627404	3.91759	4.77923	5.60147	3.00804	0.0200804	3.97451
GMEB1	DLX6	0.190123	3.70212	4.94929	5.60147	5.03496	0.0403496	3.96429
EGR3	ANKRD31	0.837444	4.31292	5.12106	5.60147	2.51713	0.0151713	3.95654
MEF2B	AKAP7	0.345772	4.09053	4.53142	5.60147	3.85661	0.0285661	3.95514
HOXA7	HOXA7	1	2.95638	3.43369	1.44971	1.6441	0.16338	3.95303
RUNX3	ZSCAN5A	0.45242	4.38548	4.02492	5.60147	3.51268	0.0251268	3.94814
RUNX3	AP5Z1	0.652295	4.38548	3.88528	5.60147	3.06365	0.0206365	3.93604
SIX1	ZIC1	0.692248	2.03212	1.47999	0.502173	12.7113	0.29586	3.93189
BACH2	GPATCH3	0.353849	2.61301	5.01142	5.60147	4.4068	0.034068	3.89665
EGR2	SHROOM4	-0.21352	3.58251	4.73637	5.60147	4.86806	0.0386806	3.8214
DLX5	DPT	0.599951	3.70822	5.06057	0.951451	3.1392	0.11321	3.8069
DLX5	EVA1A	-0.495049	3.70822	2.2095	1.78395	4.93081	0.106677	3.80609
FOSB	RIC8B	0.521582	1.54099	3.18218	5.60147	5.64916	0.0464916	3.76277
FOXD1	ZIC1	0.567112	1.27663	1.47999	0.464131	19.3204	0.39027	3.74986
CEBPD	MFAP3L	0.753016	2.72658	4.20433	5.60147	3.32118	0.0232118	3.72755
AR	RBM26	-0.47897	1.92918	3.27741	5.60147	5.20978	0.0420978	3.72043
RFX1	GLI4	-0.4793	3.91759	4.12189	5.60147	3.4685	0.024685	3.71192
MAF	KLHL3	0.453894	1.38103	4.3047	1.76831	3.26962	0.237448	3.70446
FOSB	CXorf56	0.513263	1.54099	4.74757	5.60147	4.72498	0.0372498	3.70202
NFATC1	CNPPD1	0.683087	3.8531	4.61686	3.57209	3.45226	0.0245633	3.68082
RUNX3	SYT12	0.438235	4.38548	3.77174	5.60147	3.55039	0.0255039	3.67664
MAFB	ERICH2	0.233943	3.57308	4.92202	5.60147	4.52182	0.0352182	3.6701
RUNX3	FBXW7	0.536823	4.38548	3.52291	5.60147	3.35323	0.0235323	3.66589
RFX1	STK38	0.664905	3.91759	2.84463	5.60147	3.50957	0.0250957	3.6556
DLX3	SLC14A1	-0.298422	4.29274	1.30391	5.60147	6.77055	0.0577055	3.65557
DLX3	MYH11	-0.445003	4.29274	4.85345	5.60147	3.19668	0.0219667	3.64682
NFE2	EN1	0.212723	4.45978	4.48242	0.770436	6.09216	0.182329	3.63918
DLX5	TBX15	-0.29688	3.70822	2.23456	0.811437	11.581	0.156922	3.62765
HOXC9	CSMD2	0.419184	2.901	4.93132	5.60147	3.82364	0.0282364	3.62663
MAF	CHST14	-0.464288	1.38103	4.49889	5.60147	5.25892	0.0425892	3.61903
RUNX3	CCNJL	0.738591	4.38548	5.10536	5.60147	2.52361	0.0152361	3.5616
TEAD2	KLHL3	0.452898	3.77835	4.3047	0.96669	5.69905	0.0874773	3.55001
FOXD1	TPRA1	0.726153	1.27663	4.1467	5.60147	4.591	0.03591	3.54993
BACH2	MC1R	-0.323722	2.61301	4.88965	5.60147	4.43967	0.0343967	3.53802
TCF7	NLRP10	-0.182902	4.32491	3.14044	2.6189	1.45898	0.371009	3.52159
RUNX2	TAF3	-0.559082	0.72437	1.03082	5.60147	12.7811	0.117811	3.52107
RUNX3	GPR85	0.415792	4.38548	5.0457	1.62865	3.05095	0.0767436	3.50849
BACH2	AP3M1	-0.298497	2.61301	4.12961	5.60147	4.9276	0.039276	3.49184
HOXD3	CSMD2	0.40396	2.64755	4.93132	1.43431	7.26013	0.0631301	3.46712
AR	ENO4	0.744753	1.92918	4.79943	0.460779	7.19871	0.150703	3.44702
RUNX3	RAB33A	0.497211	4.38548	5.01117	1.59244	3.64108	0.0543167	3.4413
FOSB	TXN2	0.647075	1.54099	3.16062	5.60147	4.93919	0.0393919	3.43473
TCF7	SUPT4H1	0.750205	4.32491	4.02247	5.60147	2.72355	0.0172355	3.43172
TEF	TEF	1	2.8919	3.41751	2.15353	3.63626	0.0442822	3.42711
MAF	SDK2	0.338194	1.38103	5.16346	5.60147	5.55671	0.0455671	3.42043
MAFB	MYO5B	0.643321	3.57308	5.14763	5.60147	2.82304	0.0182304	3.41111
TEAD2	SHC4	0.439754	3.77835	5.06498	2.56192	4.50144	0.0351252	3.40899
TEF	NRCAM	-0.371957	2.8919	4.15085	5.60147	4.21695	0.0321695	3.39279
CREB3L1	BAIAP2L1	0.51231	2.74752	2.91938	5.60147	4.3657	0.033657	3.38216
DLX3	TSHZ2	0.501765	4.29274	2.23221	5.60147	4.07871	0.0307871	3.38192
HOXA5	RARRES1	0.727956	1.91462	4.80977	1.2388	5.62329	0.0718087	3.35336
AR	SCAF4	-0.217077	1.92918	2.8629	5.60147	7.54556	0.0654556	3.31691
FOSB	WHAMM	-0.201202	1.54099	4.31622	5.60147	7.16039	0.0616039	3.30663
NFE2	RAB33A	0.297635	4.45978	5.01117	4.84451	3.02231	0.0337362	3.28565
CEBPA	GFRA1	0.695682	4.22504	1.7564	5.60147	3.90638	0.0290638	3.28316
AR	NME7	0.89641	1.92918	2.3106	5.60147	4.35743	0.0335743	3.27449
CREB3L1	PLXNA4	0.272654	2.74752	1.79421	5.60147	7.10044	0.0610044	3.26117
RUNX3	BHLHE41	0.505934	4.38548	3.60773	0.829389	6.58509	0.0743327	3.24971
FOS	SYT12	0.604828	2.01181	3.77174	5.60147	4.08976	0.0308976	3.24853
AR	GSK3A	-0.407189	1.92918	4.58896	5.60147	4.54195	0.0354195	3.2484
MAFB	B3GNTL1	-0.50947	3.57308	4.82169	5.60147	3.11639	0.0211639	3.24274
RFX1	RAB40A	0.52614	3.91759	5.03876	5.60147	2.91306	0.0191306	3.24208
TEAD1	SNAP25	0.121642	4.96476	5.16363	5.60147	4.83623	0.0383623	3.24079
SIX1	FAM110A	0.76705	2.03212	4.5442	5.60147	3.3999	0.023999	3.23737
GATA2	PIEZO2	0.912949	4.45262	3.28299	5.60147	2.63499	0.0163499	3.22054
MAF	TRPA1	-0.260075	1.38103	4.86609	2.94679	5.1926	0.120351	3.21858
DLX3	SECISBP2L	0.391846	4.29274	3.75708	5.60147	3.55552	0.0255552	3.21652
DLX5	PTCH2	-0.242401	3.70822	4.33121	5.60147	4.36453	0.0336453	3.20239
TCF7	TMCO4	0.768807	4.32491	3.47293	0.673272	6.8927	0.0597195	3.20027
BACH2	CABYR	0.179282	2.61301	4.94527	5.60147	5.48787	0.0448787	3.19606
DLX3	SLC9B1	0.136634	4.29274	4.87199	5.60147	4.9913	0.039913	3.18881
RUNX2	ZNF500	-0.237093	0.72437	4.49888	5.60147	9.09518	0.0809518	3.18657
BACH2	ZFHX3	0.682568	2.61301	3.1411	5.60147	3.72303	0.0272303	3.1814
DLX5	SLC35C1	-0.487373	3.70822	4.79715	5.60147	3.10736	0.0210736	3.1801
SIX1	CDK15	0.554148	2.03212	4.60727	2.48339	2.35687	0.104585	3.17593
AR	SVOP	0.748601	1.92918	5.17347	5.60147	3.29925	0.0229925	3.17474
FOSB	KIAA1549L	-0.250348	1.54099	1.04267	5.60147	12.3778	0.113778	3.17318
HOXB4	ZFHX4	0.922529	4.14778	2.49345	2.97832	1.91409	0.0581495	3.16284
PRDM1	C8orf34	-0.201669	4.49923	0.804916	5.60147	9.29882	0.0829882	3.157
HOXB8	PLXNA4	0.573374	4.1156	1.79421	5.60147	4.16516	0.0316516	3.12662
MAFB	SPDL1	-0.566362	3.57308	4.50238	5.11751	3.13507	0.0213604	3.12246
SIX1	RAD9A	0.760311	2.03212	3.4192	5.60147	3.78519	0.0278519	3.11969
DLX1	TBX15	-0.422608	4.35323	2.23456	5.60147	4.19267	0.0319267	3.08241
BACH2	AGTPBP1	-0.349563	2.61301	2.85978	5.60147	5.11476	0.0411476	3.07943
TCF7L2	BMPR2	0.605415	3.11301	3.33504	5.60147	3.4943	0.024943	3.06864
TEF	HTR7	-0.613636	2.8919	4.05307	1.60769	2.32003	0.113618	3.04805
DLX6	SH3RF1	-0.458798	4.33859	2.81302	2.58392	4.58335	0.0457257	3.03225
DLX2	SLC35D1	0.407395	4.30221	2.89562	5.60147	3.78925	0.0278925	3.00464
TCF7	ZMAT2	0.824043	4.32491	2.40492	5.60147	3.04804	0.0204804	2.99701
FOXD1	ZNF180	-0.48411	1.27663	4.73812	5.60147	4.80199	0.0380199	2.99467
NFATC1	ITGA11	0.405446	3.8531	2.48004	5.60147	4.22401	0.0322401	2.95546
FOXD1	PLEKHA2	0.327811	1.27663	3.23019	5.60147	6.76059	0.0576059	2.94896
NFATC2	ERAP1	-0.664908	3.38455	4.47903	5.60147	2.8393	0.018393	2.94859
NFE2	PAK3	0.474459	4.45978	2.94401	0.431454	9.53418	0.114136	2.92478
FOSB	PRKAA2	-0.318518	1.54099	3.62157	5.60147	5.93778	0.0493778	2.91937
TEF	BHLHE41	0.676612	2.8919	3.60773	0.793113	6.49812	0.080025	2.91142
RFX1	TMEM107	0.812318	3.91759	4.95409	5.60147	2.38078	0.0138078	2.90306
AR	ZNF282	-0.252452	1.92918	4.44936	5.60147	5.41281	0.0441281	2.89928
RFX1	PCDHGA12	-0.417155	3.91759	3.36693	5.60147	3.60218	0.0260218	2.88905
HOXB8	GPM6B	-0.313486	4.1156	1.67921	5.60147	5.39305	0.0439305	2.87515
FOSB	RAB40A	0.205532	1.54099	5.03876	5.60147	6.16235	0.0516235	2.8438
FOS	HOXC6	-0.322197	2.01181	2.70229	5.60147	5.90069	0.0490069	2.83729
TCF7	NR6A1	0.661595	4.32491	2.95546	5.60147	2.99732	0.0199732	2.83581
FOXD1	GCNT4	-0.178943	1.27663	4.97042	5.60147	7.14639	0.0614639	2.79372
DLX5	OLFML1	-0.227229	3.70822	3.42037	0.94535	7.32282	0.139714	2.78748
TCF7	LRRC8E	0.624764	4.32491	4.99396	5.60147	2.47741	0.0147741	2.76655
AR	NLRP10	-0.161234	1.92918	3.14044	3.01952	1.33805	0.699088	2.75907
DLX5	ARHGAP42	-0.310071	3.70822	3.30225	5.60147	4.12899	0.0312899	2.74781
AR	TSPAN18	0.187131	1.92918	3.25695	1.10489	7.71961	0.272569	2.73351
MAFB	SLC35C1	-0.526923	3.57308	4.79715	5.60147	2.87668	0.0187668	2.73123
BACH2	LURAP1L	-0.142322	2.61301	2.85432	5.60147	7.29415	0.0629415	2.72979
TCF7	LY6K	0.39133	4.32491	4.66392	5.00461	1.99873	0.0345089	2.72475
AR	TMEM182	0.373376	1.92918	4.63725	5.60147	4.34685	0.0334685	2.72203
AR	TMCO4	0.63586	1.92918	3.47293	0.902108	7.19411	0.0977884	2.70366
AR	RRP15	-0.379829	1.92918	3.06257	5.60147	5.15873	0.0415872	2.69682
MAFB	PNPLA1	0.856896	3.57308	5.16603	5.60147	2.3144	0.013144	2.69522
MAFB	TRPA1	-0.204123	3.57308	4.86609	1.15814	6.52819	0.099997	2.68322
AR	RIC8B	0.461731	1.92918	3.18218	5.60147	4.62948	0.0362948	2.66788
SIX4	FIBIN	-0.435354	4.05726	4.15308	1.71044	3.1665	0.0671262	2.66701
DLX1	BNC1	0.772703	4.35323	4.47577	5.60147	2.34597	0.0134597	2.66288
DLX6	GFRA1	0.250864	4.33859	1.7564	5.60147	5.51091	0.0451091	2.66195
HOXA7	PPM1M	0.586299	2.95638	4.85373	5.60147	2.92035	0.0192035	2.64284
DLX1	SLC35D1	0.515637	4.35323	2.89562	5.60147	3.2335	0.0223369	2.62963
ATF1	NALCN	0.397481	1.99475	2.54066	5.60147	5.34984	0.0434984	2.62584
BACH2	DHTKD1	0.388606	2.61301	4.77988	5.60147	3.64486	0.0264486	2.62092
RFX1	CEP152	0.680911	3.91759	4.60479	5.60147	2.51354	0.0151353	2.61758
CEBPA	RAET1G	0.712468	4.22504	4.9795	5.60147	2.33507	0.0133507	2.61751
FOSB	C5AR1	-0.126251	1.54099	3.21113	5.60147	9.14266	0.0814266	2.60516
AR	TUSC3	-0.637047	1.92918	3.09678	5.60147	4.01706	0.0301706	2.58374
DLX3	PAFAH2	0.422096	4.29274	4.85546	4.9599	2.98041	0.0198151	2.57704
HOXC9	CAPS	0.635905	2.901	4.45153	5.60147	2.919	0.01919	2.57667
AR	KCNMB1	0.41059	1.92918	5.14918	5.60147	3.89426	0.0289426	2.57503
BACH2	PKMYT1	0.547226	2.61301	5.15415	5.60147	3.04172	0.0204172	2.56378
PRDM1	GLIS1	0.668071	4.49923	2.9764	2.24955	1.31632	0.0967338	2.56264
TCF7	DLX6	0.300127	4.32491	4.94929	5.60147	3.21442	0.0221442	2.56148
HOXB5	ZIC1	0.410589	3.41131	1.47999	5.60147	5.21501	0.0421501	2.55238
MAF	BID	-0.655581	1.38103	4.26852	0.76534	9.19042	0.093881	2.55196
DLX3	ARHGAP42	-0.312014	4.29274	3.30225	5.60147	3.74648	0.0274648	2.5493
HOXC8	ZNF45	0.48317	1.76895	4.86919	5.60147	3.84334	0.0284334	2.5475
DLX6	NR6A1	0.285877	4.33859	2.95546	5.60147	4.05678	0.0305678	2.54625
DLX3	KMT2C	0.402138	4.29274	3.65123	5.60147	3.22971	0.0222971	2.54251
AR	TMEM37	0.947486	1.92918	4.92148	0.452325	6.44121	0.0964635	2.52826
HOXA6	GPM6B	-0.387648	3.43908	1.67921	5.60147	5.00692	0.0400692	2.51576
RUNX3	TPCN2	0.755029	4.38548	4.79796	5.60147	2.25369	0.0125369	2.51433
RUNX3	MAP3K7CL	-0.648707	4.38548	2.08236	1.58386	1.98961	0.134451	2.50998
HOXA11	GRPEL2	-0.516615	3.2013	4.692	5.60147	2.95415	0.0195415	2.50925
AR	ITGBL1	0.534236	1.92918	2.85324	2.05047	5.10289	0.0814047	2.50474
BACH2	RRP8	0.318477	2.61301	4.79547	5.60147	3.88313	0.0288313	2.50263
AR	SIM2	0.635348	1.92918	5.04855	0.939174	3.67576	0.117115	2.50182
AR	UNC13B	-0.544729	1.92918	3.23847	2.51165	3.13005	0.0935015	2.50162
FOSB	LRRC1	0.563854	1.54099	4.14432	5.60147	4.05476	0.0305476	2.49841
FOXD1	SYT12	0.672924	1.27663	3.77174	0.954176	3.21553	0.249879	2.48418
RFX1	PLXNA4	0.39891	3.91759	1.79421	5.60147	4.50702	0.0350702	2.48254
HOXB5	KCNE4	-0.29816	3.41131	1.08362	3.74963	8.25851	0.0726701	2.48024
EGR2	HOXD9	0.436745	3.58251	4.45796	1.25362	4.98859	0.0567722	2.47646
FOSB	CPNE7	-0.31217	1.54099	4.06147	5.60147	5.2796	0.042796	2.47275
DLX1	SCN2A	0.685369	4.35323	4.91006	0.533832	3.87976	0.0814402	2.47099
MAF	GLIS1	0.445292	1.38103	2.9764	1.74496	1.75371	0.439714	2.46293
DLX5	MYH11	-0.349909	3.70822	4.85345	5.60147	3.1844	0.021844	2.45376
TCF7L2	SUPT4H1	0.889608	3.11301	4.02247	5.60147	2.54398	0.0154398	2.45091
EGR3	SHROOM4	-0.20472	4.31292	4.73637	5.60147	3.77252	0.0277252	2.45011
SIX4	PBX4	0.523638	4.05726	4.61187	5.60147	2.6702	0.016702	2.44769
DLX5	CALB2	0.8773	3.70822	5.09326	5.60147	2.19829	0.0119829	2.44488
HOXB5	KCNK15	0.376828	3.41131	4.47178	5.60147	3.29798	0.0229798	2.44029
SIX4	CDK15	0.389903	4.05726	4.60727	4.26568	2.2833	0.0342763	2.43319
MAFB	TMTC1	0.750381	3.57308	1.00184	5.60147	4.54697	0.0354697	2.42664
MAFB	USP36	0.49979	3.57308	3.6614	5.60147	3.12163	0.0212163	2.42567
ATF1	PITX2	-0.639776	1.99475	3.05551	1.3498	4.58469	0.100265	2.41952
CEBPA	PPP1R3E	0.303177	4.22504	4.63335	5.60147	3.24232	0.0224232	2.41701
FOXD1	HOXA10	0.511486	1.27663	2.23429	1.30756	6.36134	0.198964	2.41447
BACH2	UBE2R2	0.208913	2.61301	2.42523	5.60147	6.214	0.05214	2.40272
RFX1	SYT12	0.724208	3.91759	3.77174	5.60147	2.55696	0.0155696	2.38631
AR	NR6A1	0.911736	1.92918	2.95546	5.60147	3.39683	0.0239683	2.37072
SIX4	AKAP17A	-0.317385	4.05726	4.45929	5.60147	3.25467	0.0225467	2.36035
TCF7L2	TAF3	-0.45859	3.11301	1.03082	5.60147	5.8734	0.048734	2.35946
NFE2	SHROOM4	-0.202639	4.45978	4.73637	5.60147	3.65388	0.0265388	2.32499
NR3C1	WDR25	-0.528161	3.10809	3.82989	5.60147	3.10907	0.0210907	2.30923
DLX3	TBX15	-0.253043	4.29274	2.23456	0.609425	12.2777	0.126714	2.30136
TEAD2	SCN2A	0.669593	3.77835	4.91006	0.768894	2.83987	0.0848114	2.30048
BACH2	BDKRB1	-0.356546	2.61301	2.66491	0.465389	7.81106	0.254681	2.2986
MEF2B	SMIM13	0.351756	4.09053	4.74588	5.60147	2.99944	0.0199944	2.29397
TCF7	XG	-0.335476	4.32491	3.72025	2.31757	1.03737	0.176767	2.29392
DLX5	SLC14A1	-0.21064	3.70822	1.30391	5.60147	6.84536	0.0584536	2.28278
MAFB	COMMD4	-0.685483	3.57308	3.80767	5.60147	2.64733	0.0164733	2.27818
FOSB	PELO	-0.574965	1.54099	4.52641	0.431076	10.4632	0.125926	2.27787
GATA2	RARRES1	0.937073	4.45262	4.80977	0.953621	3.96329	0.0299388	2.27081
NFE2	SYT12	0.422162	4.45978	3.77174	0.75615	4.91442	0.0854645	2.25528
NFE2	CCDC170	0.437078	4.45978	4.16762	0.383822	8.41406	0.0855334	2.24405
FOXD1	LRP12	-0.558259	1.27663	0.455593	5.60147	11.604	0.10604	2.238
HOXB5	TPRA1	0.937667	3.41131	4.1467	5.60147	2.30342	0.0130342	2.23064
SIX1	RARRES1	0.139717	2.03212	4.80977	5.60147	5.91946	0.0491946	2.22753
TCF7L2	ITGBL1	0.575027	3.11301	2.85324	3.41274	2.34437	0.0544807	2.22627
HOXB8	OSBPL6	-0.429963	4.1156	3.06029	5.60147	3.25457	0.0225457	2.22579
FOSB	RRP15	-0.330433	1.54099	3.06257	5.60147	5.55456	0.0455456	2.20988
DLX3	BOD1	0.190636	4.29274	4.44553	5.60147	3.82465	0.0282465	2.20152
NFE2	FAM124A	0.880119	4.45978	5.10188	1.23432	2.77206	0.0320276	2.19452
DLX6	TECPR1	0.367975	4.33859	4.1242	5.60147	2.98051	0.0198051	2.17708
DLX3	MRPS22	-0.527017	4.29274	4.28721	0.867262	4.31155	0.0599896	2.17567
DLX2	CALCB	0.499975	4.30221	5.17381	5.60147	2.43077	0.0143077	2.16803
MAFB	SH3RF1	-0.315631	3.57308	2.81302	1.10036	6.73644	0.0921218	2.16632
PRDM1	SMIM13	0.605818	4.49923	4.74588	5.60147	2.29721	0.0129721	2.15928
SIX1	EIF5AL1	0.756404	2.03212	5.16918	5.60147	2.75402	0.0175402	2.14996
TCF7	SVOP	0.725778	4.32491	5.17347	5.60147	2.11565	0.0111565	2.14704
HOXA2	ENO4	0.543636	4.36219	4.79943	5.60147	2.40167	0.0140167	2.14617
ZIC4	KATNAL2	-0.205995	3.73784	3.34172	5.60147	4.39005	0.0339005	2.145
AR	MAP2K6	0.799392	1.92918	4.51627	5.60147	2.88632	0.0188632	2.12409
HOXA7	ZNF45	0.379783	2.95638	4.86919	5.60147	3.17992	0.0217992	2.1228
DLX5	PLEKHH3	-0.295944	3.70822	4.1032	5.60147	3.4426	0.024426	2.12099
HOXB8	ARMC1	0.924182	4.1156	3.86123	5.60147	2.1809	0.011809	2.11867
BACH2	POLB	0.195097	2.61301	4.78715	5.60147	4.46181	0.0346181	2.11148
HOXB8	HOXB9	0.828039	4.1156	4.98687	0.658513	4.57716	0.0411163	2.10614
RFX1	TMEM167A	-0.60188	3.91759	3.51266	5.60147	2.6868	0.016868	2.10265
HEY2	PITX2	-0.323795	4.16271	3.05551	0.885125	7.2437	0.0794166	2.09703
TCF7	WHAMM	-0.219344	4.32491	4.31622	2.75767	4.83059	0.0384094	2.09502
BACH2	ABCC2	0.710139	2.61301	5.1142	0.710668	2.6602	0.116698	2.09367
JUNB	HIVEP3	0.583997	1.79628	2.31402	5.60147	4.44337	0.0344337	2.08041
RFX1	AKAP17A	-0.486876	3.91759	4.45929	5.60147	2.64711	0.0164711	2.07731
HOXA11	OMD	0.232335	3.2013	4.95586	5.60147	3.70575	0.0270575	2.07027
NFE2	NFASC	-0.256569	4.45978	1.5236	2.28476	3.0205	0.171885	2.06797
NFE2	HSH2D	0.707672	4.45978	5.15922	5.60147	2.08651	0.0108651	2.06771
BACH2	CRLF2	0.593974	2.61301	5.16521	0.463877	4.6023	0.12008	2.05515
NFE2	ITGA11	0.705632	4.45978	2.48004	0.449794	6.39832	0.0906003	2.03498
BACH2	RAD9A	0.126941	2.61301	3.4192	5.60147	6.17919	0.0517919	2.03312
DLX2	ANKRD35	0.553541	4.30221	4.38505	0.444495	6.38284	0.0685764	2.03176
NFE2	HOXB4	0.914238	4.45978	4.83674	1.14576	2.10661	0.0425253	2.02418
PGR	CSMD2	0.515185	4.5244	4.93132	5.60147	2.33922	0.0133922	2.01704
MAFB	PRR16	-0.307488	3.57308	4.57095	0.465657	5.0874	0.169391	2.01526
CEBPA	GPLD1	0.70662	4.22504	4.69457	0.813656	3.7588	0.0468716	2.00915
NR3C1	SNAP25	0.421711	3.10809	5.16363	5.60147	2.8506	0.018506	1.99993
HOXC10	SLC46A3	0.589041	3.52125	3.93061	5.60147	2.64697	0.0164697	1.99086
NFE2	BAIAP2L1	0.557824	4.45978	2.91938	0.701271	6.13663	0.0635373	1.98585
FOXD1	PLXNA4	0.465207	1.27663	1.79421	5.60147	6.2815	0.0528149	1.98019
HOXB8	ZFHX4	0.845833	4.1156	2.49345	0.897024	3.75032	0.0678056	1.97996
HOXB3	EN1	0.866267	1.46248	4.48242	4.64494	1.55145	0.0483597	1.97904
MAFB	KLHL3	0.189651	3.57308	4.3047	1.00026	4.63666	0.1461	1.97656
DLX6	TMEM182	0.427014	4.33859	4.63725	5.60147	2.58463	0.0158463	1.97098
FOSB	ZSCAN5A	0.613425	1.54099	4.02492	5.60147	3.57804	0.0257804	1.96588
HOXC4	EN1	0.367741	3.76201	4.48242	2.71673	1.59175	0.0730328	1.95845
TEF	MLC1	0.364345	2.8919	5.17329	5.60147	3.08148	0.0208148	1.95838
MAFB	TEC	0.658372	3.57308	3.97865	0.380781	7.42365	0.073945	1.95637
DLX6	ANKRD35	0.246554	4.33859	4.38505	0.465806	7.52252	0.118503	1.94774
SIX4	OSBPL6	-0.371045	4.05726	3.06029	5.60147	3.29241	0.0229241	1.94773
HOXA6	OSBPL6	-0.511142	3.43908	3.06029	5.60147	3.08744	0.0208743	1.94204
DLX5	TRIM44	-0.30741	3.70822	3.07517	5.60147	3.68335	0.0268335	1.94078
FOXD1	PELO	-0.787471	1.27663	4.52641	5.60147	3.30309	0.0230309	1.93904
MAFB	RFX8	-0.318824	3.57308	1.84857	3.70437	2.06033	0.120641	1.939
TEAD2	TBX15	-0.534299	3.77835	2.23456	0.800278	5.93735	0.0896643	1.92191
TCF7	CORIN	-0.164074	4.32491	4.83168	5.60147	3.70148	0.0270148	1.92041
HOXD3	ERICH2	0.747378	2.64755	4.92202	5.60147	2.44091	0.0144091	1.91874
TCF7L2	NR6A1	0.785374	3.11301	2.95546	5.60147	2.73371	0.0173371	1.91829
AR	ESPNL	0.33524	1.92918	5.10151	5.60147	3.76024	0.0276024	1.9182
FOXD1	LY6K	0.894863	1.27663	4.66392	1.26895	3.36168	0.0842941	1.91588
DLX2	EVA1A	-0.519481	4.30221	2.2095	3.11487	3.65149	0.0341023	1.91536
MAFB	SCN1A	0.215497	3.57308	4.71522	0.643857	6.4856	0.126296	1.91476
DLX5	KMT2C	0.332763	3.70822	3.65123	5.60147	3.29888	0.0229888	1.91393
DLX3	FCHO2	0.492369	4.29274	1.78079	5.60147	3.55408	0.0255408	1.91382
TEAD1	SHC4	0.292516	4.96476	5.06498	2.73991	3.6135	0.0262134	1.90903
MAF	DLX6	0.294759	1.38103	4.94929	0.831758	3.76452	0.302145	1.90605
HOXC5	TMEM108	0.669931	4.44425	4.01045	0.644929	3.90045	0.06343	1.90521
TCF7	KCNMB1	0.390842	4.32491	5.14918	5.60147	2.53695	0.0153695	1.90103
RUNX3	LRRN3	0.6916	4.38548	4.9836	1.16945	1.63915	0.0654831	1.89734
SIX4	ARMC1	0.539421	4.05726	3.86123	5.60147	2.5615	0.015615	1.89332
DLX3	SH3RF1	-0.416715	4.29274	2.81302	1.89069	4.56251	0.0435781	1.89164
BACH2	KLF7	0.250393	2.61301	3.93676	5.60147	4.15463	0.0315463	1.89096
HOXC4	PLXNA4	0.459029	3.76201	1.79421	5.60147	3.82389	0.0282389	1.87408
TCF7	ACVR1B	-0.361147	4.32491	4.38695	5.60147	2.76156	0.0176156	1.86715
FOSB	AP3M1	-0.524602	1.54099	4.12961	5.60147	3.69774	0.0269774	1.86543
HOXA7	EN1	0.25516	2.95638	4.48242	3.28212	1.84637	0.0902262	1.8488
HOXB8	ESR2	0.565376	4.1156	5.14339	5.60147	2.23138	0.0123138	1.84199
MEF2B	KTI12	0.646482	4.09053	4.97334	5.60147	2.15491	0.0115491	1.83343
RUNX3	SCN3A	0.571725	4.38548	4.43071	2.15905	1.76895	0.0431905	1.8325
FOSB	NLRP10	-0.151173	1.54099	3.14044	4.28821	1.01976	0.572339	1.83102
DLX3	STARD10	0.58659	4.29274	4.73552	5.60147	2.22677	0.0122677	1.82464
DLX6	CDK15	0.115469	4.33859	4.60727	1.37834	4.40637	0.130061	1.82323
DLX5	MRPS12	-0.423792	3.70822	4.32462	5.60147	2.74475	0.0174475	1.82307
FOXD1	ZNF195	-0.763116	1.27663	4.18958	5.60147	3.36593	0.0236593	1.82069
AR	HCK	0.524223	1.92918	5.0571	2.62171	1.94574	0.0696096	1.81605
AR	RHPN2	0.465418	1.92918	4.95912	3.50688	1.6877	0.0689061	1.81591
MAFB	CALB2	0.681425	3.57308	5.09326	5.60147	2.19151	0.0119151	1.81383
BACH2	KCNMB1	0.377137	2.61301	5.14918	5.60147	3.06686	0.0206686	1.80171
HOXB5	HTR7	-0.769358	3.41131	4.05307	0.577771	2.33722	0.125142	1.79758
FOXD1	ARMC1	0.744553	1.27663	3.86123	5.60147	3.49728	0.0249728	1.7955
HOXC10	TSHZ2	0.442881	3.52125	2.23221	5.60147	3.57221	0.0257221	1.7917
DLX5	DIRC3	0.741549	3.70822	2.49857	0.446843	6.57533	0.0886482	1.78953
NFATC1	FLNB	0.842447	3.8531	2.80745	5.60147	2.43686	0.0143686	1.78736
AR	PLEKHS1	0.836065	1.92918	3.55814	0.731264	1.15938	0.367014	1.78574
HNF4G	KATNAL2	-0.347131	3.58529	3.34172	5.60147	3.30714	0.0230714	1.77753
HOXB7	EN1	0.76455	2.24213	4.48242	2.54558	1.75619	0.0517347	1.77713
HOXB8	CRMP1	0.623727	4.1156	4.79182	5.60147	2.18154	0.0118154	1.77599
FOSB	PPP1R37	0.769097	1.54099	4.75972	5.60147	2.92192	0.0192192	1.77448
MAF	NRCAM	-0.285235	1.38103	4.15085	5.60147	4.92028	0.0392028	1.76665
FOSB	NME7	0.692665	1.54099	2.3106	5.60147	4.109	0.03109	1.76485
TCF7	RIC8B	0.341171	4.32491	3.18218	5.60147	3.13717	0.0213717	1.76341
MAFB	ZNF662	0.734115	3.57308	5.07183	0.750988	3.18568	0.0553805	1.76264
MAFB	RUNX1	-0.604968	3.57308	2.64765	1.40936	4.24491	0.0513057	1.75668
RFX1	PLEKHA2	0.399441	3.91759	3.23019	5.60147	3.03435	0.0203435	1.7478
DLX5	UTP23	-0.331139	3.70822	3.40362	5.60147	3.27516	0.0227516	1.74447
HOXB6	KCNK15	0.673593	2.66559	4.47178	5.60147	2.52437	0.0152437	1.73067
MAFB	EFHB	0.549831	3.57308	5.14592	5.60147	2.31721	0.0131721	1.72844
MAFB	ZSCAN16	0.472051	3.57308	5.12632	5.60147	2.45414	0.0145414	1.72841
MEF2B	NUP43	0.619459	4.09053	4.49149	5.60147	2.22056	0.0122056	1.72786
JUNB	GYG2	0.681057	1.79628	4.9312	5.60147	2.81157	0.0181157	1.72114
GATA2	SLC38A4	-0.226218	4.45262	4.85653	5.60147	3.05416	0.0205416	1.71908
TCF7	HOXA10	0.572496	4.32491	2.23429	1.12958	3.16429	0.0868363	1.71705
DLX3	KLHL3	0.155792	4.29274	4.3047	0.926906	6.59099	0.0976029	1.71661
DLX5	UGGT1	-0.428484	3.70822	2.85631	5.60147	3.14564	0.0214564	1.71582
HOXB4	PLXNA4	0.558344	4.14778	1.79421	5.60147	3.26067	0.0226067	1.71569
DLX5	TMEM158	-0.416185	3.70822	2.54125	0.32624	11.5868	0.115243	1.70849
HOXB4	HOXB9	0.857287	4.14778	4.98687	0.840668	3.5521	0.0322409	1.70721
DLX6	KIT	0.499301	4.33859	5.05942	5.60147	2.24075	0.0124075	1.70683
FOSB	HOXA10	0.50747	1.54099	2.23429	5.60147	4.7049	0.037049	1.70601
EGR2	SIX1	0.274149	3.58251	2.60397	3.12573	3.79181	0.0561017	1.70053
AR	LY6K	0.298649	1.92918	4.66392	2.09459	2.88454	0.104681	1.69953
TCF7L2	ZMAT2	0.895174	3.11301	2.40492	5.60147	2.68429	0.0168429	1.69722
MAFB	KIAA0513	0.620687	3.57308	4.23385	2.08515	2.07478	0.0416703	1.69272
NFATC1	KIAA0408	0.743679	3.8531	4.89072	0.93892	2.44739	0.0524882	1.69029
NFE2	HOXB9	0.769528	4.45978	4.98687	0.628399	4.10243	0.0382883	1.68931
FOXD1	CMIP	0.537199	1.27663	2.73953	5.60147	4.53288	0.0353288	1.68532
EGR3	KCNE4	-0.114871	4.31292	1.08362	5.60147	7.99225	0.0699225	1.68053
RUNX3	CACFD1	0.255453	4.38548	4.80239	5.60147	2.91265	0.0191265	1.67884
NFE2	SNX29	-0.443401	4.45978	2.26015	2.10919	3.16885	0.0560825	1.6753
MAFB	RAB15	-0.572791	3.57308	5.05748	5.60147	2.27141	0.0127141	1.67439
TCF7	HIVEP3	0.586883	4.32491	2.31402	0.460194	6.04652	0.102436	1.67414
HOXD9	LIG4	-0.658954	3.98373	4.82367	5.60147	2.11541	0.0111541	1.67361
MAFB	ERCC2	-0.670352	3.57308	3.2915	5.60147	2.50608	0.0150608	1.66681
NFE2	ITSN2	-0.178779	4.45978	2.41163	5.60147	4.46259	0.0346259	1.6643
AR	OMD	0.484328	1.92918	4.95586	0.400887	9.18949	0.0974102	1.66168
DLX3	RAI14	-0.374545	4.29274	3.27533	2.18861	2.2584	0.0636361	1.6564
EGR3	GPR157	0.732077	4.31292	4.41622	2.33333	1.91469	0.0265876	1.65627
TCF7	TMEM144	0.426035	4.32491	4.40687	1.22487	3.43705	0.0483885	1.65414
NFE2	SLC25A37	0.241871	4.45978	2.81194	5.02606	3.8253	0.0282661	1.6484
FOXD1	HOXB9	0.755611	1.27663	4.98687	0.544588	7.69461	0.0817281	1.64747
RUNX2	FIBIN	-0.342927	0.72437	4.15308	1.63823	6.52123	0.149312	1.64563
HOXB8	KCNE4	-0.230716	4.1156	1.08362	5.60147	5.8531	0.048531	1.63718
PRDM1	MYO5B	0.842858	4.49923	5.14763	1.95455	2.6198	0.0163787	1.63718
NR3C1	MCOLN3	0.308437	3.10809	5.05102	4.08421	1.88658	0.0437947	1.63397
SIX1	LRRN3	0.579895	2.03212	4.9836	2.81219	1.13465	0.0871712	1.63351
HOXA11	MR1	0.364387	3.2013	2.86804	5.60147	3.48814	0.0248814	1.62646
NFIC	SDK2	0.828262	3.22858	5.16346	5.60147	2.03324	0.0103324	1.62485
CEBPA	MEAF6	0.438118	4.22504	3.96709	5.60147	2.54874	0.0154874	1.62367
HOXB5	PITX2	-0.588367	3.41131	3.05551	0.953465	3.55638	0.0780452	1.62298
PRDM1	SLC38A4	-0.153801	4.49923	4.85653	5.60147	3.47672	0.0247672	1.62096
TEAD1	BNC1	0.52135	4.96476	4.47577	1.32897	2.63909	0.0398556	1.6194
PRRX2	OSBPL6	-0.534138	0.497948	3.06029	5.60147	6.47753	0.0547753	1.61769
MAFB	KAZN	0.862602	3.57308	0.60662	5.60147	4.45707	0.0345707	1.61372
DLX6	ZNF45	0.207662	4.33859	4.86919	5.60147	3.11028	0.0211028	1.61289
TCF7	SKIDA1	0.329454	4.32491	5.14447	5.60147	2.54256	0.0154256	1.61038
TCF7L2	CCDC170	0.43321	3.11301	4.16762	5.60147	2.81399	0.0181399	1.60703
HOXA11	PITX2	-0.605682	3.2013	3.05551	1.13117	3.56365	0.0671398	1.60346
SIX1	ZSCAN5A	0.513251	2.03212	4.02492	5.60147	3.1575	0.021575	1.60189
BACH2	ERF	0.58101	2.61301	4.35991	0.242495	10.2295	0.0974681	1.60038
MAFB	ADA	-0.636529	3.57308	4.53054	5.60147	2.23806	0.0123806	1.59928
HOXD3	BOD1	0.531506	2.64755	4.44553	5.60147	2.69291	0.0169291	1.59747
RUNX3	ITGA11	0.358123	4.38548	2.48004	0.447644	8.09534	0.112884	1.59334
GATA2	HTR7	-0.54849	4.45262	4.05307	1.04575	2.82204	0.0541621	1.58218
SIX1	MRPL15	0.734837	2.03212	4.38801	5.60147	2.63187	0.0163187	1.57637
HOXB9	ABCA6	-0.211208	4.39238	3.31579	5.60147	3.5636	0.025636	1.57412
TCF7L2	PLEKHM3	0.412979	3.11301	2.74609	5.60147	3.36082	0.0236082	1.56904
MAFB	TP53I13	-0.407596	3.57308	2.35835	2.77146	4.58498	0.0359471	1.56889
MAFB	PRDM8	-0.466316	3.57308	4.65664	0.937536	2.31221	0.0930986	1.56586
DLX3	OLFML1	-0.135486	4.29274	3.42037	0.897994	8.32329	0.10525	1.56491
DLX6	PTBP3	0.579028	4.33859	3.80232	5.60147	2.28143	0.0128143	1.56423
HOXC10	ZNF333	0.5338	3.52125	4.21259	5.60147	2.44321	0.0144321	1.56394
SIX1	NGF	-0.18365	2.03212	1.43446	5.60147	7.73513	0.0673513	1.56222
MAF	B3GNTL1	-0.517177	1.38103	4.82169	5.60147	3.38739	0.0238739	1.56003
DLX5	TSHZ2	0.330917	3.70822	2.23221	5.60147	3.72729	0.0272729	1.55971
TCF7	GLIPR1L1	0.222997	4.32491	5.01925	2.64191	2.58529	0.0471315	1.5583
MAFB	MAP3K13	-0.303238	3.57308	2.10909	5.60147	4.02201	0.0302201	1.55583
NFE2	NXPH3	0.431216	4.45978	5.09058	1.18851	3.15404	0.0423617	1.55461
TCF7	ZIC1	0.454612	4.32491	1.47999	0.438983	9.77537	0.124379	1.55313
TCF7	PITX2	-0.459335	4.32491	3.05551	1.5854	1.51644	0.106141	1.54894
FOXD1	SLC35F6	-0.494984	1.27663	2.45204	5.60147	4.75077	0.0375077	1.54657
RUNX3	SLC35F6	-0.495507	4.38548	2.45204	5.60147	2.83011	0.0183011	1.54588
RUNX3	SEC24D	-0.351152	4.38548	3.65758	5.60147	2.76909	0.0176909	1.54559
RUNX3	ZNF592	0.671815	4.38548	4.0694	5.60147	2.09649	0.0109649	1.54382
MAFB	LRRC8B	0.417525	3.57308	5.08239	5.60147	2.47055	0.0147055	1.54301
HOXC4	CRMP1	0.584113	3.76201	4.79182	5.60147	2.19257	0.0119257	1.54226
EN1	SLC38A4	-0.304697	3.97736	4.85653	5.60147	2.7179	0.017179	1.5393
DLX1	DLX1	1	4.35323	4.9423	1.70843	2.59859	0.0161016	1.53796
MAFB	DLX2	0.713986	3.57308	4.87261	0.933798	3.14695	0.0420883	1.53744
DLX5	CDO1	0.161927	3.70822	5.08137	5.60147	3.53309	0.0253309	1.52958
SIX4	CCDC3	-0.626596	4.05726	4.73931	5.60147	2.08383	0.0108383	1.52426
RUNX3	HOXB9	0.787056	4.38548	4.98687	0.433158	4.494	0.0453602	1.51987
DLX3	TRIM44	-0.280731	4.29274	3.07517	5.60147	3.24952	0.0224952	1.51742
RUNX3	DSG2	0.652203	4.38548	5.16657	5.60147	1.94294	0.00942941	1.51652
TEAD1	DIRC3	0.621681	4.96476	2.49857	5.60147	2.43898	0.0143898	1.51608
BACH2	CASC1	-0.423095	2.61301	4.80423	5.60147	2.81121	0.0181121	1.51484
RUNX3	NR6A1	0.331499	4.38548	2.95546	5.60147	3.05328	0.0205328	1.50883
RUNX3	ITGBL1	0.551871	4.38548	2.85324	5.60147	2.53694	0.0153694	1.5082
RUNX3	AIMP1	-0.611263	4.38548	1.0189	5.60147	3.67438	0.0267438	1.50344
HOXC10	PPID	0.752109	3.52125	3.52545	5.60147	2.26714	0.0126714	1.50244
CEBPA	MYH11	-0.44681	4.22504	4.85345	5.60147	2.2811	0.012811	1.49981
HOXB8	ENO4	0.209463	4.1156	4.79943	5.60147	3.09036	0.0209036	1.49714
KLF12	MYH11	-0.599192	2.92281	4.85345	5.60147	2.34124	0.0134124	1.4951
NFE2	ABCC2	0.939236	4.45978	5.1142	0.813567	2.7082	0.0316229	1.49259
AR	RAB40A	0.619989	1.92918	5.03876	0.44017	6.73193	0.0835369	1.49183
GATA2	KRT34	-0.220535	4.45262	2.29419	0.450192	9.95661	0.147673	1.49119
MAFB	GPRC5A	-0.493512	3.57308	1.61589	5.60147	3.59456	0.0259456	1.48855
NFATC1	CDK15	0.616184	3.8531	4.60727	0.607866	5.08038	0.0440399	1.48769
NFE2	HOXB6	0.797189	4.45978	3.08048	0.64309	3.02036	0.0699202	1.4874
NR3C1	ZNF45	0.468219	3.10809	4.86919	5.60147	2.4972	0.014972	1.48401
AR	MAPRE3	-0.411015	1.92918	3.90464	0.608766	8.13035	0.0966733	1.48142
MEF2B	CSRNP3	0.535326	4.09053	3.76885	0.946095	2.35626	0.0803611	1.47846
RUNX3	HIVEP3	0.603574	4.38548	2.31402	0.776446	4.9342	0.0629197	1.47649
HOXC8	CYGB	0.690356	1.76895	2.54212	5.60147	3.44779	0.0244779	1.46759
AR	CPZ	0.627306	1.92918	5.02306	5.60147	2.63537	0.0163537	1.4675
HOXC8	DCUN1D5	0.597911	1.76895	2.72235	5.60147	3.55379	0.0255379	1.46378
FOSB	LURAP1L	-0.282866	1.54099	2.85432	5.60147	5.10246	0.0410246	1.45885
MAFB	OSCAR	0.234679	3.57308	5.13377	5.60147	3.00909	0.0200909	1.45778
FOSB	ZNF282	-0.154679	1.54099	4.44936	5.60147	5.47661	0.0447661	1.45644
MAFB	TPX2	-0.637483	3.57308	3.66762	0.502729	5.6304	0.0615417	1.45525
NFE2L2	EN1	0.401717	2.63744	4.48242	1.21177	2.98983	0.0843805	1.45186
HOXD3	OSCAR	0.754116	2.64755	5.13377	5.60147	2.16644	0.0116644	1.45088
FOSB	GPATCH3	0.51706	1.54099	5.01142	5.60147	3.09487	0.0209487	1.45013
HOXA2	GPM6B	-0.430752	4.36219	1.67921	5.60147	3.40424	0.0240424	1.44657
CEBPD	OTUD4	0.564603	2.72658	2.75857	5.60147	3.01541	0.0201541	1.44563
TCF7	DDR1	0.759603	4.32491	4.265	1.83895	1.8577	0.0301449	1.44292
MAFB	PLAG1	0.736516	3.57308	1.95713	5.60147	2.7907	0.017907	1.44172
FOS	RAD9A	0.710287	2.01181	3.4192	5.60147	2.84355	0.0184355	1.43471
FOXD1	CEP152	0.761541	1.27663	4.60479	0.654063	3.98394	0.122692	1.43125
RFX1	GSDMD	0.789281	3.91759	3.7362	5.60147	2.06796	0.0106795	1.42915
EGR2	MRAP2	-0.237991	3.58251	4.33838	5.60147	3.16902	0.0216902	1.42418
MAFB	LMO4	0.757587	3.57308	2.07027	5.60147	2.68606	0.0168606	1.42165
RFX1	TNIP3	0.421824	3.91759	5.16725	5.60147	2.29491	0.0129491	1.42141
DLX5	STARD10	0.515062	3.70822	4.73552	5.60147	2.24518	0.0124518	1.41637
TCF7L2	FGF14	0.390219	3.11301	2.96769	0.404488	9.51226	0.102064	1.4157
DLX2	POLB	0.609295	4.30221	4.78715	5.60147	2.0035	0.010035	1.41321
DLX3	SLC35C1	-0.339727	4.29274	4.79715	5.60147	2.46309	0.0146309	1.41222
TCF7L2	HOXA10	0.794566	3.11301	2.23429	1.22603	2.39308	0.0870239	1.41106
FOSB	PITX2	-0.534581	1.54099	3.05551	1.09819	3.28923	0.155145	1.41061
MAFB	ZNF793	0.331993	3.57308	4.90365	5.60147	2.63976	0.0163976	1.41039
TCF7	HSH2D	0.434863	4.32491	5.15922	5.60147	2.18192	0.0118192	1.40166
HOXB5	LAMA3	-0.376804	3.41131	1.90392	5.60147	3.73462	0.0273462	1.40001
RUNX3	PAMR1	-0.398556	4.38548	1.75653	2.32941	2.34625	0.0833545	1.39866
AR	ARHGAP8	0.17197	1.92918	5.04934	5.60147	4.39107	0.0339107	1.39723
GATA2	PAX9	0.718724	4.45262	4.22626	5.60147	1.94688	0.00946876	1.39658
RUNX3	LY6K	0.959944	4.38548	4.66392	0.892019	2.6867	0.0296298	1.39424
AR	CA12	-0.456392	1.92918	2.05367	0.906148	5.9306	0.143251	1.392
HOXC4	ZFHX4	0.552759	3.76201	2.49345	3.22186	1.77509	0.0468432	1.38909
SIX1	MRAP2	-0.353313	2.03212	4.33838	5.60147	3.36463	0.0236463	1.38816
HOXA11	RAD9A	0.610453	3.2013	3.4192	5.60147	2.48944	0.0148944	1.38781
NFE2	DIRAS1	0.846277	4.45978	4.33331	1.28376	1.78397	0.0370199	1.3866
TCF7L2	SKIDA1	0.467392	3.11301	5.14447	5.60147	2.38245	0.0138245	1.38095
TCF7	RAB40A	0.568462	4.32491	5.03876	0.435002	4.77282	0.0535928	1.3784
AR	KCTD16	-0.22211	1.92918	2.18097	4.33486	1.34213	0.25327	1.37703
HOXB8	IQSEC2	0.774775	4.1156	4.56105	5.60147	1.89293	0.00892932	1.37698
CEBPA	RRP7A	-0.567849	4.22504	4.12922	5.60147	2.15078	0.0115078	1.37348
FOXC1	PLEKHA2	0.635539	0.909762	3.23019	5.60147	4.15712	0.0315712	1.37304
TEAD1	MYH11	-0.330715	4.96476	4.85345	5.60147	2.32189	0.0132189	1.37006
AR	GLIPR1L1	0.331635	1.92918	5.01925	2.56958	2.06515	0.0803592	1.36937
HOXB8	LIG4	-0.444751	4.1156	4.82367	5.60147	2.2374	0.012374	1.36925
MAF	ARHGAP20	-0.221607	1.38103	0.77057	5.60147	10.6841	0.0968407	1.36676
DLX5	LEKR1	-0.340988	3.70822	4.60679	0.445235	6.33871	0.0830627	1.36553
NFATC2	C7orf69	-0.160446	3.38455	4.09339	1.46922	1.79281	0.232981	1.36412
TCF7	NME7	0.59599	4.32491	2.3106	5.60147	2.58147	0.0158147	1.36198
CEBPB	MFAP3L	0.586811	2.71424	4.20433	5.60147	2.46986	0.0146986	1.36174
SIX1	DPAGT1	0.850823	2.03212	4.33957	5.60147	2.36607	0.0136606	1.35843
FOXD1	MLC1	0.260071	1.27663	5.17329	5.60147	4.28876	0.0328876	1.35703
MAF	SLC35C1	-0.542287	1.38103	4.79715	5.60147	3.14394	0.0214394	1.35645
NFE2	SIM2	0.39247	4.45978	5.04855	0.736708	4.4733	0.0465376	1.35523
MAFB	C8orf34	-0.327108	3.57308	0.804916	5.60147	5.58827	0.0458827	1.35118
HOXA7	TRPA1	-0.467449	2.95638	4.86609	2.76226	1.80024	0.0403489	1.34928
HOXC10	MYH11	-0.723754	3.52125	4.85345	5.60147	1.98121	0.00981212	1.3469
PRDM1	SHROOM3	0.691064	4.49923	3.38863	5.60147	2.08969	0.0108969	1.3439
FOXD1	HTR7	-0.78263	1.27663	4.05307	1.0756	1.53389	0.20107	1.34337
BACH2	ATL1	-0.201439	2.61301	3.15413	1.46981	2.62899	0.20923	1.34227
JUNB	KIAA1549L	-0.317638	1.79628	1.04267	5.60147	6.86213	0.0586213	1.3405
CEBPA	TEC	0.61191	4.22504	3.97865	5.60147	2.10398	0.0110398	1.33831
FOXD1	MRPS33	0.66941	1.27663	3.92115	5.60147	3.21261	0.0221261	1.33425
RUNX3	CLMP	0.54547	4.38548	3.60222	2.73906	1.57246	0.0358884	1.33196
MAFB	BTG2	0.832731	3.57308	3.81387	0.899063	2.89791	0.0450141	1.33088
JUNB	AKAP17A	-0.416615	1.79628	4.45929	5.60147	3.21247	0.0221247	1.3286
DLX3	LEKR1	-0.333913	4.29274	4.60679	0.410707	6.82925	0.0717285	1.32851
FOS	PIEZO2	0.441622	2.01181	3.28299	5.60147	3.39466	0.0239466	1.32816
BACH2	ZFYVE28	0.14434	2.61301	2.09687	5.60147	5.99592	0.0499592	1.32701
NFATC1	CRMP1	0.509002	3.8531	4.79182	5.60147	2.1627	0.011627	1.32373
DLX3	CALB2	0.723761	4.29274	5.09326	5.60147	1.81978	0.00819784	1.32235
DLX5	MRPS22	-0.455269	3.70822	4.28721	0.896405	3.29782	0.0617763	1.32179
SIX1	CHN1	0.554519	2.03212	3.59159	5.60147	2.96329	0.0196329	1.31891
FOS	MESP1	0.650221	2.01181	5.02753	5.60147	2.45606	0.0145606	1.31742
DLX3	GRIA1	0.207261	4.29274	4.57356	0.52492	6.53387	0.0943618	1.31694
HOXD3	SLC9B1	0.38735	2.64755	4.87199	5.60147	2.72253	0.0172253	1.31249
MAFB	SLC15A2	-0.330137	3.57308	5.06149	5.60147	2.54272	0.0154272	1.31191
TCF7L2	HIVEP3	0.777295	3.11301	2.31402	0.465205	5.0953	0.098633	1.30909
MAFB	SF3B4	-0.401728	3.57308	4.15727	5.60147	2.54101	0.0154101	1.30887
BACH2	LRRC29	-0.156955	2.61301	5.05675	5.60147	3.8914	0.028914	1.30708
DLX3	PLEKHH3	-0.231982	4.29274	4.1032	5.60147	2.94135	0.0194135	1.30697
RUNX3	PPP5C	-0.379261	4.38548	4.4323	0.659528	5.55489	0.0483518	1.30589
TEF	SPOCK1	0.612845	2.8919	1.97576	5.60147	3.12597	0.0212597	1.30351
RUNX3	TRPC1	-0.441072	4.38548	2.47552	5.60147	2.76028	0.0176028	1.30325
HOXB8	PELO	-0.65475	4.1156	4.52641	5.60147	1.96819	0.00968193	1.30195
RUNX3	AKAP17A	-0.293503	4.38548	4.45929	5.60147	2.57334	0.0157334	1.30171
TCF7	CLCN4	0.857173	4.32491	4.94733	0.44828	3.55486	0.0444936	1.30042
BACH2	NUCB2	-0.272095	2.61301	2.47656	5.60147	4.16495	0.0316495	1.30014
AR	CCDC170	0.38578	1.92918	4.16762	0.456492	7.31832	0.125378	1.29916
HOXA11	GLI4	-0.453878	3.2013	4.12189	5.60147	2.5267	0.015267	1.29411
DLX5	SH3RF1	-0.252289	3.70822	2.81302	3.20677	3.88561	0.0394299	1.29297
NFE2	KCNMB1	0.509016	4.45978	5.14918	5.60147	1.99122	0.00991219	1.29233
SIX1	PRKG1	-0.494655	2.03212	2.96644	5.60147	3.3252	0.023252	1.29142
MAFB	FAM189A2	0.369046	3.57308	4.82586	0.879237	3.62324	0.0636365	1.29006
PRDM1	NFATC2	0.736369	4.49923	3.8879	5.60147	1.92723	0.00927225	1.28934
DLX1	HOXC8	0.79059	4.35323	2.38843	0.86936	3.60269	0.04999	1.28702
TEF	SLC38A4	-0.201681	2.8919	4.85653	5.60147	3.38859	0.0238859	1.28422
RUNX3	DOK1	0.539041	4.38548	3.41944	0.335528	7.07099	0.0668308	1.28168
HOXC10	CAPS	0.282526	3.52125	4.45153	5.60147	2.82734	0.0182734	1.28164
DLX6	PLEKHH3	-0.227725	4.33859	4.1032	5.60147	2.92682	0.0192682	1.28062
DLX3	UTP23	-0.292961	4.29274	3.40362	5.60147	2.862	0.01862	1.27772
HOXB4	CRMP1	0.652219	4.14778	4.79182	5.60147	1.91689	0.00916886	1.27622
MAFB	ARHGAP20	-0.126548	3.57308	0.77057	5.60147	8.60099	0.0760099	1.27594
SIX1	C15orf40	0.622869	2.03212	3.68354	5.60147	2.76439	0.0176439	1.27382
TCF7L2	LY6K	0.614322	3.11301	4.66392	2.72611	1.50587	0.0347666	1.27297
TCF7L2	KCNMB1	0.484521	3.11301	5.14918	5.60147	2.2818	0.012818	1.27243
DLX6	GRIA1	0.201161	4.33859	4.57356	0.545032	6.3161	0.092463	1.27053
EGR3	PLAG1	0.750286	4.31292	1.95713	5.60147	2.45725	0.0145725	1.27029
SIX1	MSANTD1	0.327371	2.03212	5.11739	5.60147	3.12853	0.0212853	1.26987
TCF7	STARD3NL	0.556123	4.32491	3.26956	5.60147	2.2697	0.012697	1.26944
BACH2	PABPC1L	-0.203847	2.61301	3.42332	5.60147	4.05861	0.0305861	1.26793
NR3C1	ANKS1B	-0.436211	3.10809	1.67235	5.60147	3.69788	0.0269788	1.26705
RUNX3	UBE2R2	0.480829	4.38548	2.42523	5.60147	2.66123	0.0166123	1.2664
AR	TPRA1	0.630802	1.92918	4.1467	0.477503	7.57263	0.0693601	1.26561
HOXA4	RARRES1	0.483504	4.30094	4.80977	0.914831	3.95334	0.0349693	1.26497
BACH2	TSPAN17	0.339983	2.61301	4.49198	0.814945	4.73793	0.0820382	1.26406
TCF7L2	TMCO4	0.777424	3.11301	3.47293	0.636262	5.34666	0.044077	1.26027
AR	LAMA3	-0.355414	1.92918	1.90392	0.457521	10.7329	0.195885	1.2557
TCF7L2	RRP15	-0.363204	3.11301	3.06257	5.60147	3.09041	0.0209041	1.25305
HOXB5	AKAP17A	-0.364979	3.41131	4.45929	5.60147	2.5667	0.015667	1.25059
DLX6	DCT	-0.251408	4.33859	5.16724	1.77391	2.18997	0.0571116	1.25049
RUNX3	ITGB2	0.377674	4.38548	3.45804	5.60147	2.53355	0.0153355	1.2465
RUNX3	C15orf40	0.630698	4.38548	3.68354	5.60147	2.05984	0.0105984	1.24588
ATF4	ENKUR	0.179325	3.4823	3.97036	5.60147	3.53643	0.0253643	1.24573
NFE2	RIC8B	0.267373	4.45978	3.18218	5.60147	2.97185	0.0197185	1.24555
AR	CEP152	0.439566	1.92918	4.60479	5.60147	2.93688	0.0193688	1.24422
HOXB4	OSBPL6	-0.401904	4.14778	3.06029	5.60147	2.64408	0.0164408	1.24223
RUNX3	ACOX2	-0.331451	4.38548	4.28387	3.18777	1.66399	0.0375701	1.24094
DLX6	BOD1	0.127816	4.33859	4.44553	5.60147	3.53824	0.0253824	1.24016
NFE2	CNPPD1	0.869988	4.45978	4.61686	0.956288	2.0116	0.0359069	1.23732
EGR2	TSHZ3	-0.452111	3.58251	1.98086	1.31882	3.19231	0.0915965	1.23725
SIX1	CRMP1	0.664756	2.03212	4.79182	5.60147	2.41352	0.0141352	1.23699
FOXD1	SLC35F5	-0.78952	1.27663	2.97571	5.60147	3.25888	0.0225888	1.23675
HOXB5	PAX9	0.568217	3.41131	4.22626	5.60147	2.21583	0.0121583	1.23623
DLX5	SMIM13	0.632184	3.70822	4.74588	0.495679	4.97877	0.0449928	1.23536
BACH2	SUPT4H1	0.308519	2.61301	4.02247	5.60147	3.15492	0.0215492	1.23492
CEBPA	ZNF436	0.270016	4.22504	4.51818	5.60147	2.6243	0.016243	1.23073
SIX1	LY6K	0.940116	2.03212	4.66392	1.00657	2.53037	0.0542121	1.23029
FOSB	MAPRE3	-0.377073	1.54099	3.90464	0.791017	7.38183	0.0928451	1.23003
DLX4	ITGA11	0.185191	4.51015	2.48004	5.60147	3.79305	0.0279305	1.22924
DLX3	SLC35D1	0.289743	4.29274	2.89562	0.69264	7.49733	0.0656649	1.22811
DLX3	MEAF6	0.399521	4.29274	3.96709	5.60147	2.36332	0.0136332	1.22792
SIX4	NLRP10	-0.271972	4.05726	3.14044	3.00829	1.05557	0.111317	1.22494
MAFB	SYTL3	-0.497821	3.57308	3.96113	0.76979	1.72005	0.131236	1.22434
TCF7	MPV17	-0.466248	4.32491	2.87946	5.60147	2.50259	0.0150259	1.22302
HOXA6	KCNE4	-0.270788	3.43908	1.08362	5.60147	5.17564	0.0417564	1.22163
NFE2	GNAL	-0.253311	4.45978	3.58182	0.695589	4.65649	0.0931252	1.22053
BHLHE41	HOXB5	0.809479	3.15116	3.81932	0.957553	3.01097	0.0434526	1.22053
MAF	ZNF793	0.454548	1.38103	4.90365	5.60147	3.20686	0.0220686	1.22028
ZIC1	ZIC1	1	1.10959	1.47999	0.428606	12.0115	0.143912	1.21667
BACH2	CACNA1C	0.362524	2.61301	2.97054	5.60147	3.32056	0.0232056	1.21456
EGR3	WDR25	-0.326456	4.31292	3.82989	5.60147	2.56473	0.0156473	1.21217
AR	TXLNB	0.537283	1.92918	5.10041	0.742464	4.17792	0.0738608	1.21124
AR	MPV17	-0.543111	1.92918	2.87946	5.60147	3.22162	0.0222162	1.20953
EGR3	PTGS2	0.743052	4.31292	3.45909	1.37448	1.80164	0.0440308	1.20869
HOXB5	CRMP1	0.465855	3.41131	4.79182	5.60147	2.25256	0.0125256	1.20351
DLX3	ATG4C	-0.199502	4.29274	3.45339	5.60147	3.2356	0.022356	1.19834
CEBPA	OTUD4	0.387208	4.22504	2.75857	5.60147	2.73281	0.0173281	1.19708
HOXD3	ZNF501	0.7241	2.64755	5.01914	5.60147	2.07125	0.0107125	1.19591
FOXD1	SIM2	0.870991	1.27663	5.04855	0.698181	3.5764	0.0852756	1.19532
NFE2	SUPT4H1	0.546821	4.45978	4.02247	5.60147	2.05725	0.0105725	1.19514
HOXC10	DLX1	0.663469	3.52125	4.9423	0.98139	2.76099	0.0381456	1.19343
TCF7	GPATCH3	0.44162	4.32491	5.01142	5.60147	2.07236	0.0107236	1.1915
FOSB	LY6K	0.547909	1.54099	4.66392	2.13433	1.96567	0.0718085	1.18634
BACH2	DYNC1I1	-0.226364	2.61301	0.241037	5.60147	12.681	0.11681	1.18295
HOXC10	ARID1A	-0.417046	3.52125	1.89027	5.60147	3.30197	0.0230197	1.18189
MAF	ERICH2	0.184049	1.38103	4.92202	5.60147	4.63682	0.0363682	1.18174
HOXA4	EN1	0.535367	4.30094	4.48242	1.545	2.1408	0.0345733	1.18025
TCF7L2	NME7	0.771018	3.11301	2.3106	5.60147	2.50805	0.0150805	1.17496
HOXB5	PELO	-0.646498	3.41131	4.52641	3.92587	2.29848	0.0130055	1.17151
AR	RARRES1	0.388034	1.92918	4.80977	1.38911	3.73663	0.0625622	1.16922
BACH2	SLC35E4	-0.23203	2.61301	4.06963	5.60147	3.44381	0.0244381	1.16318
MAFB	INHBA	-0.446259	3.57308	0.972849	1.5802	3.02542	0.15644	1.16017
FOXD1	IQSEC2	0.730762	1.27663	4.56105	5.60147	2.76174	0.0176174	1.15966
AR	PURA	-0.49013	1.92918	3.24122	3.25242	1.71355	0.067838	1.15869
TEAD1	MYO5B	0.636468	4.96476	5.14763	5.60147	1.73355	0.00733553	1.15865
HOXB5	IQSEC2	0.655676	3.41131	4.56105	5.60147	2.00844	0.0100844	1.15741
PRDM1	EFHB	0.508735	4.49923	5.14592	5.60147	1.9155	0.00915499	1.157
RFX1	CRMP1	0.492663	3.91759	4.79182	5.60147	2.0757	0.010757	1.15672
MAFB	RBL1	-0.701615	3.57308	4.30735	5.60147	1.96841	0.00968408	1.15299
HOXB9	ZIC1	0.838825	4.39238	1.47999	5.60147	2.50518	0.0150547	1.15198
HOXC10	SLC15A2	-0.50681	3.52125	5.06149	5.60147	2.08899	0.0108899	1.15103
TEAD2	SNRNP27	0.601877	3.77835	2.90863	5.60147	2.3314	0.013314	1.15007
RFX1	METTL6	-0.50568	3.91759	3.61454	2.52011	2.70697	0.0235401	1.14989
FOXD1	RPAP3	0.660824	1.27663	3.61894	0.866432	5.6807	0.0765133	1.14976
RUNX3	ZSCAN18	-0.668924	4.38548	4.27624	5.60147	1.87321	0.00873213	1.14938
TCF7L2	GPATCH3	0.62401	3.11301	5.01142	5.60147	2.03463	0.0103463	1.1479
TCF7	KLF2	0.585818	4.32491	3.41281	1.24863	3.78402	0.0280715	1.14685
FOSB	TTF1	0.542288	1.54099	2.67438	5.60147	3.56734	0.0256734	1.14653
NFIX	MLC1	0.582124	2.49796	5.17329	5.60147	2.22252	0.0122252	1.14492
HOXA10	ZNF235	0.46404	1.02637	3.50723	5.60147	4.032	0.03032	1.14387
TCF7	C5AR1	-0.339915	4.32491	3.21113	0.884455	3.53439	0.0772378	1.13979
HNF4G	TP63	-0.662664	3.58529	4.12482	5.60147	2.02309	0.0102309	1.1362
TCF7	CD36	-0.299762	4.32491	3.60275	5.60147	2.6428	0.016428	1.13589
FOS	TMCO4	0.6011	2.01181	3.47293	5.60147	2.75238	0.0175238	1.13467
PRDM1	FAM180A	0.611123	4.49923	1.06116	0.95798	3.72525	0.108895	1.13388
DLX3	AFAP1	-0.420525	4.29274	4.42002	0.779503	2.4798	0.0735082	1.13376
RUNX3	BCL6	-0.389092	4.38548	3.35669	1.65564	2.08206	0.0571871	1.12912
SP7	SORCS2	0.599461	4.52729	1.05458	5.60147	3.19976	0.0219976	1.12842
DLX1	TCTEX1D2	0.779005	4.35323	4.09413	3.04678	2.20538	0.0120921	1.12808
AR	NTRK2	0.552514	1.92918	0.742707	2.21962	1.02574	0.622666	1.12229
TEF	LRCH1	-0.519304	2.8919	2.90496	5.60147	2.69743	0.0169743	1.1189
FOXD1	DIRAS1	0.598127	1.27663	4.33331	1.15663	4.2645	0.0684725	1.11753
TCF7	HTR7	-0.603449	4.32491	4.05307	3.59797	1.12813	0.0259762	1.1153
TEAD1	CSMD2	0.403108	4.96476	4.93132	0.8581	3.33331	0.0394863	1.11466
RUNX3	RPAP3	0.559503	4.38548	3.61894	2.44003	2.81763	0.0182519	1.11426
FOXD1	DPY19L1	-0.35325	1.27663	3.19031	5.60147	4.25172	0.0325172	1.1142
DLX3	SAP30	-0.52596	4.29274	4.19911	3.38764	2.42607	0.0142935	1.11374
IRX5	ZNF333	0.605586	3.26784	4.21259	5.60147	2.12238	0.0112238	1.11238
NFIC	SNAP25	0.314157	3.22858	5.16363	5.60147	2.50997	0.0150997	1.11187
MAFB	CHODL	0.678348	3.57308	4.80264	0.940892	2.12168	0.0477904	1.11054
RUNX3	CHMP1A	0.785923	4.38548	4.15369	1.01736	3.28982	0.0231352	1.10853
RFX4	NEGR1	0.749509	4.52318	1.98388	5.60147	2.28473	0.0128473	1.10582
BACH2	RAB33A	0.179013	2.61301	5.01117	0.461186	6.90902	0.148043	1.10573
HNF4G	SYT12	0.576752	3.58529	3.77174	5.60147	2.16709	0.0116709	1.10494
NFE2	RUNX3	0.591655	4.45978	4.99938	0.800179	2.29163	0.0456591	1.10448
NR3C1	BNC1	0.581151	3.10809	4.47577	2.41298	1.34753	0.0419466	1.10266
TCF7	ZFYVE28	0.519174	4.32491	2.09687	5.60147	2.60495	0.0160495	1.10261
TCF7	KIAA1549L	-0.173169	4.32491	1.04267	0.847251	11.6896	0.142492	1.10203
DLX3	THBS2	-0.289464	4.29274	1.19391	0.907202	7.17663	0.114009	1.1012
DLX6	DGKG	0.272911	4.33859	4.19863	1.06515	3.61345	0.0574063	1.09842
HOXC10	PPIP5K2	0.700428	3.52125	1.97221	5.60147	2.56823	0.0156823	1.09739
NFE2	RIMS4	0.894892	4.45978	5.16462	0.536613	3.53203	0.0280841	1.09716
TCF7	PLEKHM3	0.204443	4.32491	2.74609	5.60147	3.38291	0.0238291	1.09638
RFX1	KPTN	0.631727	3.91759	5.0547	5.60147	1.84648	0.00846475	1.09523
HOXB8	FAM155A	0.826877	4.1156	1.1155	0.878425	5.55444	0.05876	1.08835
CEBPA	OLFML1	-0.296263	4.22504	3.42037	0.775429	3.27809	0.0999878	1.08815
FOXC1	NR6A1	0.55376	0.909762	2.95546	5.60147	4.14437	0.0314437	1.08685
NFE2	TBC1D7	0.772843	4.45978	4.44545	5.60147	1.73021	0.00730207	1.08434
HOXA10	PIEZO2	0.903974	1.02637	3.28299	5.60147	3.06814	0.0206814	1.08265
HOXB6	CRMP1	0.801437	2.66559	4.79182	5.60147	1.96218	0.00962178	1.08258
EGR3	GRIA1	0.689945	4.31292	4.57356	0.529841	3.95784	0.0378265	1.07954
NFATC1	CCDC170	0.696212	3.8531	4.16762	0.402582	4.96504	0.0482438	1.0781
DLX5	CALCB	0.114048	3.70822	5.17381	5.60147	3.50707	0.0250707	1.07764
AR	NUDT12	-0.584274	1.92918	4.64151	4.27925	1.23692	0.0389083	1.07746
HOXB7	OSBPL6	-0.687648	2.24213	3.06029	5.60147	2.57851	0.0157851	1.07574
TEF	ATG4C	-0.506792	2.8919	3.45339	5.60147	2.51103	0.0151103	1.07569
GATA2	HOXA10	0.794772	4.45262	2.23429	0.445813	5.74789	0.0530874	1.0756
RFX1	SHROOM4	-0.206487	3.91759	4.73637	5.60147	2.79258	0.0179258	1.07435
SIX4	DOK1	0.855314	4.05726	3.41944	5.60147	1.86473	0.00864728	1.07179
BACH2	MOK	0.659671	2.61301	1.47739	0.459579	6.85517	0.133585	1.07176
RUNX3	AMZ1	0.729601	4.38548	4.63595	0.796327	1.81162	0.0499666	1.06925
RUNX2	SYT12	0.505375	0.72437	3.77174	5.60147	4.25058	0.0325058	1.06863
CEBPD	MYH11	-0.512379	2.72658	4.85345	5.60147	2.24992	0.0124992	1.06809
AR	TSHZ3	-0.619508	1.92918	1.98086	1.75653	1.36227	0.188539	1.06806
MAF	SH3RF1	-0.22593	1.38103	2.81302	2.56325	5.27106	0.0897888	1.06478
AR	CPNE7	-0.201476	1.92918	4.06147	5.60147	4.00499	0.0300499	1.06421
FOSB	ABCA1	-0.480305	1.54099	1.77163	5.60147	4.33723	0.0333723	1.06315
DLX6	PAFAH2	0.24505	4.33859	4.85546	5.47653	2.50121	0.0150169	1.06187
HOXA6	KIT	0.717799	3.43908	5.05942	5.60147	1.82925	0.00829246	1.06121
HOXB9	CAPS	0.56557	4.39238	4.45153	5.60147	1.90111	0.00901111	1.06117
NFE2	GPATCH3	0.576994	4.45978	5.01142	5.60147	1.81109	0.00811086	1.06109
SIX1	TRPC1	-0.467896	2.03212	2.47552	5.60147	3.37812	0.0237812	1.0592
HOXC10	CEP76	-0.323064	3.52125	4.642	5.60147	2.45722	0.0145722	1.05916
PRDM1	INSC	0.118398	4.49923	5.0126	0.788698	7.5652	0.0662987	1.05629
AR	HCFC1	0.488472	1.92918	4.54374	1.65338	2.28832	0.0651911	1.0561
AR	SMDT1	0.598994	1.92918	3.49671	3.07896	1.28349	0.0661258	1.0559
NR3C1	CSMD2	0.226493	3.10809	4.93132	0.839432	5.43351	0.0666647	1.05554
NFE2	RAD9A	0.372213	4.45978	3.4192	5.60147	2.38857	0.0138857	1.05447
HOXB8	ZKSCAN4	0.782306	4.1156	5.09458	5.60147	1.68199	0.00681994	1.05396
NFATC2	LAMA1	0.617719	3.38455	4.51861	5.60147	1.99722	0.00997222	1.05394
FOXD1	KLF16	-0.627028	1.27663	4.59169	0.745601	6.06296	0.0634117	1.05362
FOXD1	PITX2	-0.577323	1.27663	3.05551	1.6983	1.73904	0.158371	1.05334
HOXB4	IQSEC2	0.818893	4.14778	4.56105	5.60147	1.70967	0.00709666	1.05287
RUNX3	CAPS	0.326979	4.38548	4.45153	5.60147	2.28706	0.0128706	1.0525
TEAD1	TBX15	-0.36936	4.96476	2.23456	0.857804	4.59943	0.0649754	1.05047
MAFB	OLFML1	-0.299164	3.57308	3.42037	0.502848	3.69112	0.154779	1.05035
MAFB	AAR2	-0.438111	3.57308	4.68304	5.60147	2.17555	0.0117555	1.05019
BACH2	RNF182	0.262907	2.61301	4.60429	0.460406	5.96615	0.120416	1.04623
FOXC1	SLC38A4	-0.230834	0.909762	4.85653	5.60147	4.80585	0.0380585	1.04491
FOS	SLC38A4	-0.174627	2.01181	4.85653	5.60147	3.84127	0.0284127	1.04307
FOSB	CEACAM19	-0.42769	1.54099	2.95578	5.60147	3.63179	0.0263179	1.04298
ATF7	PELO	-0.446757	1.58256	4.52641	5.60147	2.96287	0.0196287	1.04253
JUNB	SYT12	0.720015	1.79628	3.77174	0.928655	4.10464	0.0558836	1.03913
DLX3	RBL1	-0.694591	4.29274	4.30735	5.60147	1.8014	0.00801401	1.03857
TCF7	ZNF282	-0.108747	4.32491	4.44936	5.60147	3.51676	0.0251676	1.03748
RUNX3	VPS33A	0.771755	4.38548	4.61573	0.827491	3.11094	0.0257952	1.03736
NFE2	LY6K	0.493395	4.45978	4.66392	0.797442	2.89545	0.0437619	1.03698
TCF7	ETHE1	-0.429949	4.32491	2.72319	5.60147	2.47437	0.0147437	1.03477
DLX5	MEAF6	0.351992	3.70822	3.96709	5.60147	2.45372	0.0145372	1.03462
MAFB	ATP6V1A	0.414933	3.57308	3.18298	5.60147	2.53914	0.0153914	1.03305
RFX1	KLF9	-0.299682	3.91759	0.703129	5.60147	5.25055	0.0425055	1.03197
NFE2	MEF2C	0.577026	4.45978	3.36399	1.07497	2.65143	0.0418152	1.03175
DLX3	TMEM158	-0.408536	4.29274	2.54125	0.224511	10.4111	0.098974	1.03102
DLX3	BICD2	0.726196	4.29274	4.10532	4.82332	1.88477	0.0088556	1.03029
BACH2	VPS4B	-0.134846	2.61301	1.0002	5.60147	7.73894	0.0673894	1.02954
DLX5	CHRNB1	0.386923	3.70822	5.06942	5.60147	2.16625	0.0116625	1.02933
HOXD9	EGR2	0.436745	3.98373	4.01681	5.60147	2.19613	0.0119613	1.02834
EGR2	UNC79	0.338358	3.58251	5.11741	2.81631	2.33642	0.0251903	1.0282
SIX1	PAMR1	-0.417766	2.03212	1.75653	2.58253	3.00903	0.0886699	1.02751
TCF7	ISLR	0.390794	4.32491	2.96697	0.668179	2.6141	0.117245	1.02694
BACH2	SETD2	0.654881	2.61301	3.35096	5.60147	2.35652	0.0135652	1.02676
DLX3	CDO1	0.128731	4.29274	5.08137	5.60147	3.10231	0.0210231	1.02585
NFIC	HNRNPA1L2	0.813755	3.22858	5.16542	5.60147	1.76394	0.0076394	1.02437
DLX5	BOD1	0.101139	3.70822	4.44553	5.60147	3.84702	0.0284702	1.02287
EGR3	C4orf3	0.766605	4.31292	2.8231	5.60147	1.98504	0.0098504	1.02234
FOSB	EXPH5	-0.363743	1.54099	4.82764	5.60147	3.14464	0.0214464	1.02225
FOXD1	SHROOM4	-0.319035	1.27663	4.73637	5.60147	3.61521	0.0261521	1.02162
ZIC1	SAP130	0.58122	1.10959	4.35864	5.60147	3.09555	0.0209555	1.02138
EGR3	PITX2	-0.251047	4.31292	3.05551	0.692488	5.00182	0.0890268	1.02016
BACH2	XKR8	0.352452	2.61301	5.01178	3.41664	2.14814	0.0300396	1.01763
CEBPA	C8orf34	-0.297044	4.22504	0.804916	5.60147	4.76458	0.0376458	1.01495
SIX1	ATG4C	-0.62832	2.03212	3.45339	5.60147	2.58688	0.0158688	1.01391
ZIC1	CRLF1	0.940512	1.10959	0.903185	5.60147	4.9095	0.039095	1.01336
MEF2B	PLGRKT	0.5066	4.09053	3.92102	5.60147	2.07233	0.0107233	1.01143
IRX5	IFIH1	0.388428	3.26784	4.45347	5.60147	2.35444	0.0135444	1.00977
RUNX3	CAPS2	0.457331	4.38548	0.583404	1.59278	5.4905	0.0983177	1.00604
RFX1	CNOT7	0.373587	3.91759	3.54624	5.60147	2.42579	0.0142579	1.00552
RUNX3	C5AR1	-0.292801	4.38548	3.21113	0.799699	2.33113	0.130555	1.00354
ERF	NFATC1	0.724731	3.63409	4.44425	5.60147	1.83355	0.0083355	1.00207
ZIC1	PAK3	0.461021	1.10959	2.94401	5.60147	3.9813	0.029813	1.00128
TEF	CMIP	0.724225	2.8919	2.73953	5.60147	2.33272	0.0133272	0.99916
HOXB8	HTR7	-0.591854	4.1156	4.05307	0.538859	2.69848	0.0695879	0.998987
NFATC1	RASSF9	-0.423404	3.8531	3.80725	2.55264	1.19069	0.0529039	0.99874
AR	CORIN	-0.106598	1.92918	4.83168	5.60147	4.76152	0.0376151	0.99685
RUNX3	STYK1	0.51779	4.38548	5.11366	1.44466	2.58693	0.0229664	0.996656
DLX5	CEBPA	0.904399	3.70822	4.75362	5.60147	1.66871	0.00668707	0.99648
RUNX3	COL21A1	-0.407066	4.38548	0.913536	0.268116	15.1611	0.150286	0.996277
RUNX2	PPP1R1C	0.507204	0.72437	5.01404	5.60147	3.64507	0.0264507	0.994894
MAF	ZSCAN16	0.519769	1.38103	5.12632	5.60147	2.7505	0.017505	0.992418
CEBPA	SPDL1	-0.535794	4.22504	4.50238	5.60147	1.90987	0.00909867	0.992099
TCF7	KCNK15	0.36426	4.32491	4.47178	5.60147	2.16202	0.0116202	0.991394
HOXB5	KIAA0319	0.834844	3.41131	5.11658	1.05145	2.15802	0.0299673	0.990828
HOXB6	ZIC1	0.867204	2.66559	1.47999	1.91056	4.4136	0.0343071	0.989719
CEBPB	QPCT	0.425075	2.71424	4.54336	5.60147	2.40273	0.0140273	0.98963
HOXD9	RAD9A	0.727833	3.98373	3.4192	5.60147	1.92347	0.00923472	0.98641
TEF	NR6A1	0.776844	2.8919	2.95546	5.60147	2.20327	0.0120327	0.985999
DLX2	TRABD2A	-0.215344	4.30221	5.02934	5.60147	2.50651	0.0150651	0.98555
ATF7	BHLHE41	0.454929	1.58256	3.60773	5.60147	3.15008	0.0215009	0.985413
RUNX3	HOXB4	0.727872	4.38548	4.83674	0.83643	2.68541	0.0284119	0.985289
AR	NSUN4	-0.47049	1.92918	4.27063	5.60147	2.68733	0.0168733	0.98455
RARG	GLIS1	0.420222	1.94154	2.9764	5.60147	3.23594	0.0223594	0.984188
HOXC9	ITGA11	0.397819	2.901	2.48004	5.60147	3.02685	0.0202685	0.983569
RFX1	LRRN3	0.53	3.91759	4.9836	2.64177	1.31409	0.0273582	0.982763
NFE2	BDKRB2	-0.36728	4.45978	2.6871	0.548878	6.52833	0.0622734	0.982146
PRDM1	ANKRD31	0.805692	4.49923	5.12106	5.60147	1.59264	0.0059264	0.981472
FOXD1	GNAL	-0.578152	1.27663	3.58182	0.952577	2.62666	0.148319	0.981094
GMEB1	COL4A4	-0.290669	3.70212	4.02361	5.60147	2.57244	0.0157244	0.981044
DLX5	ASNS	0.30554	3.70822	4.98909	5.60147	2.32984	0.0132984	0.981026
HOXB3	RARRES1	0.747294	1.46248	4.80977	1.09404	4.04575	0.0420498	0.978367
FOSB	SUPT4H1	0.593557	1.54099	4.02247	5.60147	2.73433	0.0173433	0.977327
DLX3	C20orf197	-0.365792	4.29274	5.13122	2.59994	1.37428	0.0339422	0.977163
SIX4	CC2D2B	0.331353	4.05726	5.02509	5.60147	2.1826	0.011826	0.976745
BACH2	GNAL	-0.27731	2.61301	3.58182	0.963604	2.31224	0.168783	0.976044
AR	MESP1	0.814638	1.92918	5.02753	0.423691	5.24161	0.0556071	0.975744
SIX1	UPF1	0.809877	2.03212	4.24705	5.60147	2.15465	0.0115465	0.97406
DLX1	INSC	0.145462	4.35323	5.0126	0.549528	7.1517	0.078061	0.973771
FOXD1	ENKUR	0.339484	1.27663	3.97036	0.504526	3.91168	0.286529	0.973038
CEBPD	ZNF436	0.340284	2.72658	4.51818	5.60147	2.59426	0.0159426	0.971174
HOXA10	MR1	0.418233	1.02637	2.86804	5.60147	4.28463	0.0328463	0.970535
MAFB	ZNF398	0.739541	3.57308	4.08191	0.369235	5.14207	0.0473727	0.970146
SIX1	SYDE2	0.423048	2.03212	4.07554	5.60147	2.77724	0.0177724	0.968692
RUNX3	SYDE2	0.588686	4.38548	4.07554	0.357803	5.29831	0.0484882	0.967171
AR	BMPR2	0.249669	1.92918	3.33504	5.60147	3.81503	0.0281503	0.966321
SIX4	SPOCK1	0.454225	4.05726	1.97576	5.60147	2.73286	0.0173286	0.965874
RUNX3	SLC50A1	0.816686	4.38548	4.83424	5.60147	1.61585	0.00615852	0.965117
RUNX3	TMEM243	-0.467162	4.38548	3.92821	5.60147	2.0449	0.010449	0.963231
RUNX3	DPP8	-0.669672	4.38548	1.4771	1.6657	1.8458	0.0720401	0.960831
SIX1	SUPT4H1	0.85072	2.03212	4.02247	5.60147	2.14809	0.0114809	0.960643
RUNX3	MNS1	0.382294	4.38548	4.0918	0.843752	3.77888	0.0438679	0.95952
CEBPB	GFRA1	0.662486	2.71424	1.7564	5.60147	2.88175	0.0188175	0.959329
RUNX3	DPAGT1	0.785436	4.38548	4.33957	5.60147	1.68111	0.00681112	0.95872
BACH2	NVL	0.130874	2.61301	3.8091	5.60147	4.15909	0.0315909	0.958692
NFE2	ICA1	0.40731	4.45978	5.13105	5.60147	1.94429	0.0094429	0.958546
TCF7	ZIC4	0.23202	4.32491	4.17134	5.60147	2.58056	0.0158056	0.956328
DLX6	CASP1	0.590704	4.33859	4.79233	0.810332	2.69635	0.0355563	0.954158
RFX1	ZMIZ2	0.514273	3.91759	3.89306	5.60147	2.05585	0.0105585	0.953673
DLX2	TMEM158	-0.354897	4.30221	2.54125	1.96632	4.05402	0.0306914	0.949288
TCF7L2	PPP1R37	0.787293	3.11301	4.75972	5.60147	1.80391	0.00803907	0.947591
MAFB	PDRG1	-0.229508	3.57308	5.00448	5.60147	2.58853	0.0158853	0.945256
FOXD1	GLI4	-0.407078	1.27663	4.12189	5.60147	3.34989	0.0234989	0.944535
HOXC10	SNAP25	0.223867	3.52125	5.16363	5.60147	2.59556	0.0159556	0.944257
HOXD3	TPX2	-0.426738	2.64755	3.66762	5.60147	2.57668	0.0157668	0.942963
TEF	GLI4	-0.356471	2.8919	4.12189	3.94734	2.91793	0.0192051	0.939942
TEAD1	IRGQ	-0.381865	4.96476	4.48674	5.60147	1.99069	0.00990691	0.939688
TCF7	RPS17	0.501325	4.32491	4.92398	5.60147	1.84885	0.00848852	0.938531
MAFB	FAM111A	-0.645593	3.57308	4.2429	1.30883	2.66171	0.0275142	0.938138
DLX5	HOXC6	-0.267783	3.70822	2.70229	0.448844	7.41833	0.104757	0.935984
RUNX3	PSORS1C1	-0.681198	4.38548	4.55412	1.1632	2.31266	0.025552	0.93516
DLX4	ZIC1	0.276622	4.51015	1.47999	5.60147	3.54715	0.0254715	0.934487
NFE2	GYG2	0.936678	4.45978	4.9312	5.60147	1.52868	0.00528681	0.932544
NFE2	DVL2	0.80068	4.45978	4.44005	5.60147	1.64016	0.00640164	0.932483
MAFB	DNAJB2	0.669879	3.57308	4.05137	0.433799	4.48844	0.0493116	0.931054
NFE2	TCF7	0.52928	4.45978	4.98428	0.828697	2.24516	0.0424961	0.930236
EGR1	CEP152	0.65523	3.002	4.60479	5.60147	1.94272	0.00942715	0.929192
NFE2L2	SLC38A4	-0.104124	2.63744	4.85653	5.60147	4.05824	0.0305824	0.927195
NFE2	HOXA10	0.115874	4.45978	2.23429	1.03066	6.87672	0.113251	0.926778
NFE2	BMP3	0.939115	4.45978	5.15654	0.687281	2.55761	0.0243787	0.925486
AR	LRP12	-0.494329	1.92918	0.455593	5.60147	6.68488	0.0568488	0.924873
FOXD1	XPO1	-0.440035	1.27663	4.65947	5.60147	3.06006	0.0206006	0.924271
ATF6	FAM189A2	0.598807	3.50059	4.82586	0.694417	2.64747	0.0496814	0.923948
AR	CDKN2C	0.608921	1.92918	4.16484	5.60147	2.40211	0.0140211	0.92301
HOXC8	SCN2A	0.553462	1.76895	4.91006	0.587438	2.39084	0.136599	0.922251
DLX3	FAM98B	-0.608527	4.29274	4.46808	2.54451	1.82645	0.0169975	0.922004
MAF	SCAF4	-0.34289	1.38103	2.8629	5.60147	4.01828	0.0301828	0.921008
BACH2	TTF1	0.202461	2.61301	2.67438	5.60147	3.94406	0.0294406	0.920231
FOXD1	PLEKHM3	0.337348	1.27663	2.74609	5.60147	4.2604	0.032604	0.920196
TCF7L2	MPV17	-0.591618	3.11301	2.87946	5.60147	2.329	0.01329	0.919451
DLX1	PLEKHH3	-0.587807	4.35323	4.1032	5.60147	1.84653	0.00846531	0.919328
TCF7	PCDHGA5	0.629548	4.32491	4.82768	0.86327	2.97912	0.0271873	0.919061
HOXD3	TSHZ2	0.672081	2.64755	2.23221	5.60147	2.59241	0.0159241	0.918464
HOXA4	GPM6B	-0.376307	4.30094	1.67921	4.30564	3.34452	0.0234674	0.918435
HOXC8	PPM1M	0.437252	1.76895	4.85373	5.60147	2.64828	0.0164828	0.917953
BACH2	EPDR1	0.856705	2.61301	1.40015	2.20864	1.43594	0.0923282	0.917789
NFATC1	COL21A1	-0.298794	3.8531	0.913536	1.01114	6.74451	0.127934	0.917599
PRDM1	MEX3B	0.363247	4.49923	4.6469	5.60147	2.0502	0.010502	0.915953
HOXC8	ZNF793	0.71092	1.76895	4.90365	5.60147	2.20339	0.0120339	0.915917
RUNX3	GLI4	-0.357387	4.38548	4.12189	2.40722	2.9726	0.0198076	0.915662
FOS	CXorf56	0.60419	2.01181	4.74757	5.60147	2.25342	0.0125342	0.913008
CEBPD	GPLD1	0.791934	2.72658	4.69457	0.683791	2.78356	0.0472786	0.912204
NFE2L2	HOXA10	0.360208	2.63744	2.23429	2.26729	3.20782	0.0590344	0.911379
TCF7	FBXL19	-0.51285	4.32491	4.92923	5.60147	1.81812	0.00818123	0.910941
PRDM1	KRT16	0.423914	4.49923	2.82907	5.60147	2.30657	0.0130657	0.910876
DLX2	SECISBP2L	0.481812	4.30221	3.75708	5.60147	2.02785	0.0102785	0.909261
HOXB6	OSBPL6	-0.490939	2.66559	3.06029	5.60147	2.57308	0.0157308	0.908005
TCF7	DUSP19	0.447536	4.32491	4.92026	5.60147	1.8965	0.00896496	0.906975
HEY2	UNC5C	0.734236	4.16271	1.75374	1.0074	2.67061	0.0627598	0.905048
NFE2	UNC5C	0.311717	4.45978	1.75374	1.10528	4.22079	0.0794666	0.903832
TCF7L2	TCF7	0.720208	3.11301	4.98428	0.996005	1.39573	0.0581774	0.903767
HOXB8	C4orf51	0.682124	4.1156	5.15321	5.60147	1.66785	0.00667851	0.902635
EN1	LIG4	-0.501922	3.97736	4.82367	5.60147	1.88681	0.0088685	0.902589
TCF7	ARMC1	0.426951	4.32491	3.86123	5.60147	2.08392	0.0108392	0.902114
CEBPD	OLFML1	-0.315977	2.72658	3.42037	1.40713	2.40918	0.0902772	0.901836
CEBPA	NRCAM	-0.310437	4.22504	4.15085	5.60147	2.28996	0.0128996	0.900839
DLX5	THBS2	-0.308899	3.70822	1.19391	0.848561	5.73959	0.134835	0.898092
FOXD1	VPS33A	0.832131	1.27663	4.61573	0.689265	5.08338	0.0522165	0.897106
DLX3	CEBPA	0.883559	4.29274	4.75362	5.60147	1.56672	0.00566719	0.896717
DLX5	B3GNTL1	-0.443924	3.70822	4.82169	5.60147	2.00551	0.0100551	0.896575
RUNX3	CRLF2	0.548525	4.38548	5.16521	0.43062	4.00104	0.0418396	0.895684
BACH2	KBTBD6	0.452022	2.61301	4.91258	3.31346	1.46964	0.0316836	0.895235
ZIC4	SCN1B	0.554968	3.73784	4.96026	5.60147	1.8426	0.00842599	0.894844
HOXB6	ZFHX4	0.831409	2.66559	2.49345	1.80424	2.11131	0.0424248	0.893047
HOXB4	MEF2C	0.63991	4.14778	3.36399	1.99341	1.64155	0.0305049	0.891272
RUNX3	CA12	-0.563012	4.38548	2.05367	0.827644	4.23452	0.0501338	0.890932
RUNX3	SLC14A1	-0.12562	4.38548	1.30391	5.60147	5.23065	0.0423065	0.890404
TCF7	VPS4B	-0.53555	4.32491	1.0002	5.60147	3.16645	0.0216645	0.890204
FOSB	METTL16	-0.575979	1.54099	2.75634	5.60147	3.09588	0.0209588	0.889188
HOXC10	AKR1C3	-0.542986	3.52125	0.788456	5.60147	3.77997	0.0277997	0.887349
HOXC4	HOXB9	0.568113	3.76201	4.98687	0.84205	3.34886	0.0294402	0.884829
DLX6	THBS2	-0.270759	4.33859	1.19391	0.867568	6.63799	0.109356	0.883256
TCF7	KBTBD6	0.669642	4.32491	4.91258	3.37604	1.35457	0.0135529	0.881798
MAFB	MYH11	-0.4794	3.57308	4.85345	5.60147	1.96351	0.00963514	0.88102
HOXB5	HOXB9	0.526089	3.41131	4.98687	0.690166	4.04161	0.0352363	0.879643
MAF	SPDL1	-0.536921	1.38103	4.50238	3.53364	3.27207	0.0227603	0.878573
AR	RRAGD	0.469579	1.92918	4.85002	5.60147	2.45295	0.0145295	0.877134
TCF7	ZFP69	-0.287454	4.32491	5.09983	5.60147	2.14907	0.0114907	0.877006
HOXA7	CSMD2	0.146372	2.95638	4.93132	2.44289	4.62006	0.0364069	0.876833
EGR2	ZNF354C	-0.630886	3.58251	4.87867	1.50136	1.56238	0.0338808	0.876326
DLX5	RAB6A	0.529997	3.70822	4.32632	5.60147	1.945	0.00945001	0.87541
TCF7L2	TMEM144	0.478124	3.11301	4.40687	1.30363	2.67624	0.0382183	0.874584
RUNX3	MLEC	-0.326941	4.38548	2.48433	5.60147	2.65181	0.0165181	0.873977
DLX3	MORF4L2	-0.654887	4.29274	3.74926	5.60147	1.81541	0.0081541	0.873974
HOXA5	OSBPL6	-0.531395	1.91462	3.06029	5.60147	2.79344	0.0179344	0.873754
NFE2	PRRX2	0.484804	4.45978	1.44452	0.987153	2.47188	0.114554	0.873029
FOSB	DERL1	-0.568317	1.54099	2.41283	5.60147	3.26144	0.0226144	0.873004
TFEB	CMIP	0.627018	4.17946	2.73953	5.60147	2.05365	0.0105365	0.870167
DLX5	ZNF226	-0.466179	3.70822	3.80085	5.47653	2.13227	0.0113268	0.86907
AR	SP7	0.290209	1.92918	5.17484	5.60147	2.86668	0.0186668	0.86842
BACH2	TPM1	0.485723	2.61301	2.39703	0.307991	9.7684	0.0946849	0.866654
MAFB	MPP4	-0.209061	3.57308	4.94421	1.39602	4.37121	0.0384501	0.866567
DLX5	CMYA5	0.669115	3.70822	3.84217	0.952433	1.85411	0.0514709	0.866513
DLX1	SHC4	0.382259	4.35323	5.06498	5.60147	1.94344	0.0094344	0.865632
HOXD9	GRPEL2	-0.454889	3.98373	4.692	5.60147	1.93768	0.00937682	0.865352
TCF7L2	WHAMM	-0.283087	3.11301	4.31622	1.86154	4.02201	0.0303813	0.865222
MAFB	ATF7IP2	-0.529786	3.57308	3.15803	5.60147	2.18313	0.0118313	0.864914
TCF7	CDK15	0.618717	4.32491	4.60727	0.615041	1.49643	0.0762032	0.864662
EN1	PAX9	0.727404	3.97736	4.22626	5.60147	1.72814	0.00728143	0.861836
DLX1	CYGB	0.581201	4.35323	2.54212	5.60147	2.12494	0.0112494	0.861218
SIX4	SIX4	1	4.05726	4.69077	1.0758	1.55992	0.026892	0.858881
BACH2	DDX28	0.602022	2.61301	5.11069	5.60147	1.96864	0.00968636	0.858739
ETV1	SLC46A3	0.640688	4.29835	3.93061	5.60147	1.79029	0.00790293	0.857872
TCF7	CAPS2	0.381364	4.32491	0.583404	1.52201	6.01276	0.0971244	0.855271
PRRX2	YKT6	0.698106	0.497948	3.38421	4.18491	4.69427	0.036977	0.854573
RFX1	RPAP3	0.555321	3.91759	3.61894	5.60147	1.97838	0.00978382	0.853623
AR	ARHGEF1	-0.400073	1.92918	4.14726	5.60147	2.7366	0.017366	0.852094
NFE2	RCAN3	0.38125	4.45978	3.23424	1.14884	3.72804	0.03614	0.851184
AR	DDR1	0.641287	1.92918	4.265	1.82845	1.90855	0.0461882	0.850479
BHLHE41	CMIP	0.668602	3.15116	2.73953	5.60147	2.19632	0.0119632	0.849497
HOXB6	PLXNA4	0.577612	2.66559	1.79421	5.60147	2.89522	0.0189522	0.849078
FOS	PCDHGA12	-0.460435	2.01181	3.36693	5.60147	2.76036	0.0176036	0.84891
MAFB	SHQ1	-0.593298	3.57308	4.03583	1.68562	2.50966	0.0234541	0.848872
CEBPA	FCHO2	0.584109	4.22504	1.78079	1.75985	3.83902	0.0285552	0.84785
TCF7	HOXA11	0.714181	4.32491	3.60564	1.17223	1.53481	0.0422095	0.845753
DLX3	ERBB4	-0.349054	4.29274	2.67854	1.34797	2.21718	0.0704945	0.845594
DLX1	BBS7	0.736562	4.35323	3.88927	5.60147	1.70846	0.00708464	0.845502
SIX1	ING3	-0.298792	2.03212	4.35753	5.60147	2.93984	0.0193984	0.845185
AR	EXTL1	-0.100409	1.92918	3.89325	5.60147	5.00028	0.0400028	0.844972
FOXD1	NSUN4	-0.528582	1.27663	4.27063	5.60147	2.84163	0.0184163	0.844776
DLX4	INSC	0.186074	4.51015	5.0126	1.3234	4.40992	0.034355	0.843438
DLX5	MYO5B	0.787004	3.70822	5.14763	5.60147	1.61906	0.00619063	0.843434
DLX3	DACT1	0.283758	4.29274	2.94147	1.17246	3.08678	0.0650219	0.84316
TEAD2	KRT16	0.215478	3.77835	2.82907	5.60147	3.10465	0.0210465	0.843028
MAFB	CLCN7	0.69529	3.57308	2.91961	5.60147	2.02393	0.0102393	0.841978
AR	UBE2R2	0.297345	1.92918	2.42523	5.60147	3.82381	0.0282381	0.841434
RUNX3	MRPS17	0.422875	4.38548	4.25021	5.60147	1.96762	0.00967621	0.840596
RUNX3	IL17RC	-0.423782	4.38548	3.65939	5.60147	2.06611	0.0106611	0.839126
HOXC10	ZNF501	0.594744	3.52125	5.01914	5.60147	1.79316	0.0079316	0.837412
RUNX3	PITX2	-0.441779	4.38548	3.05551	0.634857	4.6305	0.0480644	0.836436
DLX6	ZCWPW2	-0.284051	4.33859	2.92928	0.914602	3.31802	0.0763471	0.836391
NFE2	NLRP10	-0.110456	4.45978	3.14044	1.00684	2.48529	0.215804	0.835395
FOSB	PABPC1L	-0.439836	1.54099	3.42332	5.60147	3.08371	0.0208371	0.835128
MAFB	DLX4	0.286889	3.57308	5.15717	0.895421	3.59574	0.0490373	0.834663
HEY2	KIT	0.825133	4.16271	5.05942	5.60147	1.55231	0.00552307	0.834567
EGR2	MLC1	0.257335	3.58251	5.17329	5.60147	2.33602	0.0133602	0.833762
NFATC1	SNX33	-0.315523	3.8531	3.73206	5.60147	2.37877	0.0137877	0.833557
HOXB6	HOXB9	0.867701	2.66559	4.98687	0.825264	3.22545	0.0270623	0.830883
HOXA7	ERICH2	0.558405	2.95638	4.92202	5.60147	1.9403	0.009403	0.830404
TCF7L2	CAPS2	0.545437	3.11301	0.583404	1.95162	4.76197	0.0901973	0.830368
BACH2	CTDNEP1	0.502202	2.61301	2.64087	5.60147	2.62714	0.0162714	0.829804
CEBPD	GLIS1	0.60977	2.72658	2.9764	1.24658	2.69294	0.049951	0.829787
DLX5	TEC	0.640763	3.70822	3.97865	0.457661	3.41772	0.0559087	0.826719
TCF7L2	TXN2	0.799698	3.11301	3.16062	0.4369	4.60482	0.0522248	0.826705
HOXB5	PIEZO2	0.825314	3.41131	3.28299	5.60147	1.85867	0.00858666	0.826299
DLX2	PAFAH2	0.499184	4.30221	4.85546	5.60147	1.78963	0.00789632	0.825417
HOXB5	LUM	0.800096	3.41131	2.35255	0.88002	2.24701	0.0648214	0.823031
DLX3	TEC	0.600351	4.29274	3.97865	0.44064	3.98822	0.0456605	0.822773
JUNB	CDK15	0.586997	1.79628	4.60727	1.89494	1.39533	0.0639703	0.821681
DLX5	CLIC5	0.595313	3.70822	5.17241	5.60147	1.73779	0.00737789	0.820041
EGR2	LSP1	0.121647	3.58251	4.37812	2.99889	3.31132	0.043264	0.81972
EGR3	CALB2	0.896794	4.31292	5.09326	5.60147	1.49524	0.0049524	0.817124
HOXD3	KLHL3	0.559588	2.64755	4.3047	0.691087	2.49683	0.0742493	0.817087
DLX3	UGGT1	-0.303055	4.29274	2.85631	5.60147	2.5422	0.015422	0.816041
EGR1	EN1	0.510426	3.002	4.48242	0.898781	3.15268	0.0418894	0.815255
DLX5	AFAP1	-0.458812	3.70822	4.42002	0.759406	1.60004	0.0891827	0.814909
NFE2	GCNT4	-0.178752	4.45978	4.97042	5.60147	2.4792	0.014792	0.813949
FOXD1	EDEM1	-0.65595	1.27663	3.18445	0.921753	2.50423	0.132166	0.813542
ATF6	NACAD	-0.473397	3.50059	5.00113	5.60147	1.91503	0.00915032	0.813483
DLX5	CHPF2	-0.315705	3.70822	0.338527	5.60147	6.57095	0.0557095	0.812645
MAFB	NEDD9	-0.449119	3.57308	1.20121	5.60147	3.28609	0.0228609	0.811145
MAF	RUNX1	-0.652316	1.38103	2.64765	1.61047	3.45191	0.0611197	0.810427
RUNX3	HOXD9	0.5446	4.38548	4.45796	1.46973	2.46526	0.0210016	0.810184
FOXD1	ZSCAN5A	0.593843	1.27663	4.02492	5.60147	2.7332	0.017332	0.809688
AR	PPP1R37	0.675027	1.92918	4.75972	5.60147	2.10685	0.0110685	0.809659
AR	ETHE1	-0.463476	1.92918	2.72319	5.60147	2.98709	0.0198709	0.809554
MAFB	CCDC152	-0.392912	3.57308	4.95972	5.60147	2.02277	0.0102277	0.806904
EGR2	ZSCAN5A	0.443036	3.58251	4.02492	5.60147	2.0811	0.010811	0.805087
EGR3	SECISBP2L	0.74767	4.31292	3.75708	5.60147	1.69766	0.00697656	0.803757
DLX6	SLC35C1	-0.243555	4.33859	4.79715	5.60147	2.25485	0.0125485	0.803415
DLX4	CDK15	0.213187	4.51015	4.60727	5.60147	2.36662	0.0136662	0.802555
HOXC8	SNAP25	0.3153	1.76895	5.16363	5.60147	2.78534	0.0178534	0.80223
HOXB8	MEF2C	0.58158	4.1156	3.36399	0.820225	3.21901	0.0376989	0.80146
FOXD1	PRICKLE3	-0.802721	1.27663	4.92441	5.60147	2.25574	0.0125574	0.800713
MAFB	TRIM27	-0.589474	3.57308	3.39916	5.60147	1.99838	0.00998385	0.800128
AR	KPNA5	0.572769	1.92918	3.64664	2.34079	1.2925	0.0655608	0.799248
CEBPA	ST3GAL4	-0.402748	4.22504	4.76579	5.60147	1.91725	0.00917248	0.798852
DLX3	ASNS	0.28265	4.29274	4.98909	5.60147	2.11366	0.0111366	0.79817
MAFB	UBE2T	-0.589719	3.57308	5.03186	5.60147	1.76217	0.00762175	0.797669
DLX3	BCAT1	-0.676595	4.29274	3.83608	2.06139	1.58167	0.0219526	0.797466
MAFB	QPCT	0.638188	3.57308	4.54336	5.52575	1.78124	0.00781551	0.796965
TCF7	ERF	0.531908	4.32491	4.35991	1.77167	2.66663	0.0168026	0.796183
DLX5	MCCC1	-0.336126	3.70822	2.28651	1.94012	3.59117	0.0400704	0.795664
HOXB5	TMEM167A	-0.692755	3.41131	3.51266	5.60147	1.89846	0.00898463	0.793123
FOS	RAB40A	0.318238	2.01181	5.03876	5.60147	2.6527	0.016527	0.792227
FOXC1	HOXA10	0.732415	0.909762	2.23429	1.255	4.77411	0.0888135	0.792206
TEAD2	OLFML1	-0.393854	3.77835	3.42037	0.49812	5.95546	0.0523812	0.790924
TCF7L2	DDR1	0.781114	3.11301	4.265	2.36403	1.42071	0.02262	0.787893
MAFB	SHROOM3	0.364414	3.57308	3.38863	5.60147	2.35381	0.0135381	0.787581
MAFB	MEAF6	0.378435	3.57308	3.96709	5.60147	2.19171	0.0119171	0.784808
NFE2L2	PIEZO2	0.527622	2.63744	3.28299	5.60147	2.32076	0.0132076	0.784387
RUNX3	ZNF768	0.860468	4.38548	4.73457	5.60147	1.51668	0.00516678	0.784236
AR	AP3M1	-0.398701	1.92918	4.12961	2.03108	2.97231	0.0408914	0.784116
FOXD1	CCNJL	0.773994	1.27663	5.10536	5.60147	2.23897	0.0123897	0.783865
HOXD9	PITX2	-0.710108	3.98373	3.05551	0.883119	2.87176	0.0357249	0.783133
HOXA10	RAD9A	0.671119	1.02637	3.4192	5.60147	2.98621	0.0198621	0.782487
AR	CCNJL	0.621597	1.92918	5.10536	5.60147	2.09036	0.0109036	0.781626
TEF	KRT34	-0.315783	2.8919	2.29419	0.467364	4.09971	0.194687	0.781531
PRDM1	FAM135A	0.518518	4.49923	2.82869	5.60147	2.03622	0.0103622	0.779953
HOXB6	EN1	0.447828	2.66559	4.48242	1.69402	1.99161	0.0432022	0.779916
TCF7L2	ENO4	0.676529	3.11301	4.79943	0.25037	5.90551	0.0521527	0.779423
BACH2	CEACAM19	-0.132683	2.61301	2.95578	5.60147	4.21802	0.0321802	0.779162
DLX3	ZNF398	0.758127	4.29274	4.08191	5.60147	1.63864	0.00638637	0.778716
DLX6	EVA1A	-0.195818	4.33859	2.2095	1.4901	4.68722	0.059341	0.778002
RUNX3	ZC3H4	0.535949	4.38548	4.30544	5.54348	1.77776	0.00778063	0.775942
TCF7L2	PITX2	-0.537686	3.11301	3.05551	1.72563	1.0319	0.0851976	0.775897
TCF7	PCDHGA9	0.232629	4.32491	5.12376	5.60147	2.21323	0.0121323	0.775357
TCF7	MAP3K7CL	-0.533509	4.32491	2.08236	2.1926	1.55036	0.0474092	0.774333
TCF7	TTF1	0.67743	4.32491	2.67438	0.392431	5.12687	0.0489816	0.77217
RFX1	TMEM144	0.352329	3.91759	4.40687	1.83256	2.85319	0.0242153	0.770151
FOXD1	OMD	0.387393	1.27663	4.95586	0.430867	7.89201	0.0923999	0.770086
MAFB	BOD1	0.164397	3.57308	4.44553	5.60147	2.84833	0.0184833	0.770077
CEBPA	GAN	0.847378	4.22504	4.12659	5.60147	1.58601	0.00586015	0.769161
AR	LYRM2	0.718776	1.92918	3.68611	0.442352	5.25923	0.0646743	0.769053
DLX1	VEGFC	0.734306	4.35323	3.14248	0.473965	3.81961	0.0422741	0.768778
FOSB	FBXL19	-0.503837	1.54099	4.92923	5.60147	2.45799	0.0145799	0.768261
HOXB5	DGKG	0.502242	3.41131	4.19863	1.02142	3.24069	0.0322539	0.768007
DLX5	POLB	0.167936	3.70822	4.78715	5.60147	2.70141	0.0170141	0.767517
FOS	L3MBTL3	-0.359486	2.01181	4.0342	5.60147	2.72357	0.0172357	0.767179
DLX2	MYH11	-0.474624	4.30221	4.85345	5.60147	1.77733	0.00777327	0.766948
DLX3	MCCC1	-0.281281	4.29274	2.28651	2.40657	3.5944	0.0321	0.766618
TCF7	RBM43	0.672832	4.32491	2.89954	0.922224	2.00113	0.0491346	0.765089
DLX3	MRPS12	-0.275972	4.29274	4.32462	5.60147	2.20749	0.0120749	0.764944
RUNX2	DNAH12	-0.253216	0.72437	5.02408	5.60147	4.38032	0.0338032	0.764319
TEAD1	KRT16	0.177953	4.96476	2.82907	5.60147	2.88906	0.0188906	0.764107
NFE2	TPM1	0.480943	4.45978	2.39703	5.60147	2.20375	0.0120375	0.76398
RUNX3	SYNPO	0.350616	4.38548	2.1509	0.539143	5.61708	0.0762607	0.763807
RFX1	SMAD5	-0.666443	3.91759	2.35648	5.60147	2.06965	0.0106965	0.762931
SIX1	DHPS	0.576145	2.03212	4.3522	5.60147	2.2093	0.012093	0.762571
DLX5	FAM98B	-0.528083	3.70822	4.46808	3.36068	1.50611	0.0171899	0.761285
HOXC4	RARRES1	0.167467	3.76201	4.80977	1.16139	4.43563	0.0487679	0.761272
TEAD1	PTGS2	0.622639	4.96476	3.45909	3.09477	1.15956	0.0198077	0.760066
NFE2	CDH4	-0.248238	4.45978	4.18724	1.57253	2.03319	0.0512696	0.759881
MAFB	SLC23A3	0.678884	3.57308	5.05207	0.887253	1.75221	0.0398777	0.759753
HOXC10	USP22	0.803908	3.52125	3.0786	5.60147	1.84397	0.00843972	0.759699
DLX5	IRGQ	-0.16639	3.70822	4.48674	5.60147	2.76881	0.0176881	0.759451
HOXA2	LIG4	-0.56841	4.36219	4.82367	5.60147	1.67573	0.00675729	0.758617
SIX1	ADHFE1	-0.363283	2.03212	4.1388	5.60147	2.66338	0.0166338	0.758224
TCF7L2	ACVR1B	-0.35132	3.11301	4.38695	5.60147	2.25239	0.0125239	0.758109
CEBPA	SHROOM3	0.294761	4.22504	3.38863	5.60147	2.35831	0.0135831	0.757226
HOXA11	RALGAPA1	-0.534936	3.2013	3.25267	5.60147	2.13605	0.0113605	0.757145
HOXA11	PLEKHF1	0.927728	3.2013	4.66866	5.60147	1.6065	0.00606499	0.756748
DLX3	HRH1	-0.409728	4.29274	1.96824	0.89031	2.91847	0.0840849	0.756351
HOXC10	CDH6	-0.251256	3.52125	1.06117	5.60147	4.3247	0.0332469	0.756148
HOXA7	KRT34	-0.320976	2.95638	2.29419	0.466871	4.21371	0.176219	0.754703
FOS	C5AR1	-0.252199	2.01181	3.21113	5.60147	3.41749	0.0241749	0.753985
TCF7	PCDHGA12	-0.363131	4.32491	3.36693	0.872065	3.34304	0.0488523	0.753095
TEAD1	SCN2A	0.362907	4.96476	4.91006	0.70967	2.37429	0.0504996	0.752764
DLX3	EFHB	0.675188	4.29274	5.14592	5.60147	1.57246	0.00572463	0.752059
TEF	MTMR10	-0.421224	2.8919	4.25692	5.0316	2.26876	0.0126954	0.751505
NFE2L2	L3MBTL3	-0.546895	2.63744	4.0342	5.60147	2.09821	0.0109821	0.751075
NFE2	SCN1B	0.840459	4.45978	4.96026	0.442392	2.91159	0.031358	0.750966
DLX3	RAB15	-0.550979	4.29274	5.05748	5.60147	1.67066	0.00670658	0.750749
GLI3	SAP130	0.714963	1.32817	4.35864	5.60147	2.36566	0.0136566	0.74901
AR	EPB41L2	-0.411982	1.92918	2.23715	1.04971	5.40422	0.0742377	0.748812
SIX1	CEP152	0.731863	2.03212	4.60479	0.440783	4.57879	0.0539901	0.746242
HOXB4	ARMC1	0.759626	4.14778	3.86123	5.60147	1.65936	0.00659364	0.745608
BACH2	NUDT19	-0.209622	2.61301	4.69343	5.60147	2.82933	0.0182933	0.745328
TCF7	SLC35F5	-0.584239	4.32491	2.97571	5.60147	1.92088	0.00920875	0.745006
MAFB	MAGI2	0.304808	3.57308	2.9426	5.60147	2.59647	0.0159647	0.744128
DLX3	ST3GAL2	-0.396989	4.29274	2.97045	5.60147	2.19394	0.0119394	0.742754
DLX5	SHQ1	-0.580371	3.70822	4.03583	0.455649	3.91431	0.047863	0.741464
MAFB	TFAM	-0.630848	3.57308	4.04581	1.05193	2.87786	0.0268433	0.74108
JUNB	RAB40A	0.413797	1.79628	5.03876	5.60147	2.4436	0.014436	0.740053
MAFB	IDE	0.589245	3.57308	0.819582	0.792175	6.27356	0.0862612	0.739746
AR	MEX3C	-0.603711	1.92918	4.23486	5.60147	2.20787	0.0120787	0.736774
PRRX2	IQSEC2	0.77581	0.497948	4.56105	5.60147	3.27744	0.0227744	0.736697
BHLHE41	ARMCX4	0.414071	3.15116	2.39465	5.60147	2.61144	0.0161144	0.736521
MAFB	ARHGEF25	-0.274739	3.57308	4.2803	5.60147	2.33735	0.0133735	0.73571
BACH2	TANC1	-0.381536	2.61301	0.892331	5.60147	4.37443	0.0337443	0.735575
SIX4	C20orf27	0.672787	4.05726	3.81695	5.60147	1.72661	0.00726609	0.732189
FOS	ITGBL1	0.523869	2.01181	2.85324	5.60147	2.64391	0.0164391	0.732107
FOXC1	PCED1A	0.699471	0.909762	4.34191	5.60147	2.73048	0.0173048	0.731285
TCF7	SORBS2	0.672885	4.32491	2.84871	0.936122	2.08182	0.0452527	0.731114
RFX1	MEX3C	-0.76161	3.91759	4.23486	5.60147	1.63231	0.00632309	0.730506
DLX1	USP54	-0.407934	4.35323	4.71447	5.60147	1.8444	0.00844397	0.730361
TEAD1	WDR25	-0.610609	4.96476	3.82989	5.60147	1.67115	0.00671152	0.729436
FOSB	GRASP	0.463485	1.54099	5.14809	5.60147	2.44721	0.0144721	0.729436
MAF	OSCAR	0.245638	1.38103	5.13377	5.60147	3.27701	0.0227701	0.727912
TEF	PPIL6	0.259813	2.8919	4.89216	5.60147	2.44535	0.0144535	0.727717
SIX1	AP5Z1	0.812818	2.03212	3.88528	5.60147	2.0074	0.010074	0.726951
FOSB	TMEM37	0.754338	1.54099	4.92148	5.60147	2.08655	0.0108655	0.726508
HOXB8	EN1	0.269314	4.1156	4.48242	0.68542	3.68521	0.0578561	0.726058
HOXB4	ZNF783	0.62754	4.14778	3.69252	5.60147	1.76344	0.00763437	0.724797
TEF	CC2D2B	0.331712	2.8919	5.02509	5.60147	2.21232	0.0121231	0.724191
HEY2	TCF7	0.576048	4.16271	4.98428	1.21521	2.28198	0.0218499	0.724186
HOXB2	CSMD2	0.382842	3.60554	4.93132	5.60147	1.96577	0.0096577	0.72387
DLX3	BDKRB2	-0.433497	4.29274	2.6871	2.35307	1.79142	0.0343311	0.723645
MAFB	SLC3A1	-0.388517	3.57308	4.90876	0.959553	1.89884	0.0582819	0.72363
MAFB	SLC14A1	-0.303155	3.57308	1.30391	0.451084	8.70821	0.130264	0.72271
DLX2	ARHGAP42	-0.387505	4.30221	3.30225	5.60147	2.1093	0.011093	0.721553
RUNX3	SIX1	0.911497	4.38548	2.60397	0.711339	3.64144	0.0267453	0.721117
FOSB	BST1	-0.195395	1.54099	0.404566	5.60147	10.786	0.09786	0.72023
PRDM1	GPR157	0.623506	4.49923	4.41622	2.50852	1.78659	0.0129624	0.719707
TCF7	KMT2C	0.28499	4.32491	3.65123	5.60147	2.26084	0.0126084	0.718587
FOS	LY6K	0.835242	2.01181	4.66392	1.8127	1.71051	0.0295623	0.718358
DLX3	ZNF501	0.261846	4.29274	5.01914	5.60147	2.08748	0.0108748	0.717393
DLX1	PPP1R3E	0.172932	4.35323	4.63335	5.60147	2.47988	0.0147988	0.717035
BACH2	LGR6	0.636142	2.61301	5.1742	5.60147	1.8183	0.00818298	0.716832
TEAD2	MFAP5	0.841273	3.77835	2.7865	0.945297	1.51478	0.0565178	0.716805
NFE2L2	PITX2	-0.469951	2.63744	3.05551	1.9306	1.70078	0.057375	0.713481
MAF	BCO2	0.465993	1.38103	4.97801	5.60147	2.55525	0.0155525	0.713138
FOXD1	COL21A1	-0.42106	1.27663	0.913536	0.949372	7.7949	0.196205	0.713005
FOSB	ATL1	-0.2706	1.54099	3.15413	5.60147	3.65037	0.0265037	0.712777
NFATC1	RAB11B	0.786388	3.8531	3.39364	5.60147	1.71955	0.00719554	0.712679
BACH2	MCM4	0.561859	2.61301	4.89335	2.91182	1.41839	0.023996	0.711989
MAFB	WEE1	-0.420629	3.57308	3.49589	5.60147	2.13368	0.0113368	0.711906
MAFB	UBIAD1	-0.579595	3.57308	4.89796	0.727218	3.28699	0.0293518	0.711672
SIX1	NFE2	0.608516	2.03212	5.08595	5.60147	2.00664	0.0100664	0.711604
AR	MUL1	0.56503	1.92918	4.82327	5.60147	2.13049	0.0113049	0.709307
MAF	SF3B4	-0.43285	1.38103	4.15727	5.60147	2.81004	0.0181004	0.70803
DLX3	ZNF793	0.180043	4.29274	4.90365	5.60147	2.39167	0.0139167	0.706598
NFE2	BDKRB1	-0.377557	4.45978	2.66491	0.876896	3.41617	0.0525088	0.705827
DLX5	EGR3	0.88467	3.70822	4.901	0.466143	1.70584	0.0551848	0.70552
MAFB	TEX2	0.540943	3.57308	3.57015	2.7421	1.83806	0.0202825	0.705417
FOSB	EPHB1	0.735376	1.54099	4.74778	0.457255	4.15634	0.068953	0.705056
MEF2B	PDIK1L	-0.221036	4.09053	5.02674	5.60147	2.23674	0.0123674	0.704249
AR	SLC25A37	0.471214	1.92918	2.81194	0.875781	3.2837	0.0956044	0.702803
HOXB4	HTR7	-0.548099	4.14778	4.05307	0.968666	1.65656	0.0475288	0.702745
MAF	PRR16	-0.285835	1.38103	4.57095	0.466625	4.58343	0.182068	0.702614
RUNX3	CTSO	-0.198483	4.38548	3.92133	5.60147	2.47982	0.0147982	0.701624
JUNB	KIAA0408	0.616298	1.79628	4.89072	0.947757	2.35275	0.0580669	0.701032
DLX3	B3GNTL1	-0.406338	4.29274	4.82169	5.60147	1.81792	0.0081792	0.700501
HOXA5	PAX9	0.8457	1.91462	4.22626	5.60147	1.93998	0.00939985	0.698997
FOSB	SLC29A3	0.716856	1.54099	5.06339	1.4612	2.59399	0.0328997	0.697501
NFIC	EFS	0.53725	3.22858	4.04133	5.60147	1.92313	0.00923135	0.69709
DLX5	MORF4L2	-0.586305	3.70822	3.74926	5.60147	1.8328	0.00832804	0.696941
NFE2	UBE2R2	0.34358	4.45978	2.42523	5.60147	2.39663	0.0139663	0.696754
HOXB4	FAM155A	0.947446	4.14778	1.1155	0.734545	4.0782	0.0530055	0.696063
AR	ZFYVE28	0.500005	1.92918	2.09687	2.05708	3.03777	0.0550494	0.695788
AR	HOXD9	0.614224	1.92918	4.45796	0.675423	2.61463	0.0744966	0.694956
RUNX3	NUDT17	0.891745	4.38548	5.11096	0.766365	2.18511	0.0207436	0.694311
BACH2	ABCA1	-0.145537	2.61301	1.77163	5.60147	4.81635	0.0381635	0.693678
NFE2	FAM155A	0.960846	4.45978	1.1155	0.610459	2.96843	0.0800607	0.693489
RUNX2	STARD3NL	0.831765	0.72437	3.26956	5.60147	3.05616	0.0205616	0.693403
RUNX3	PPP4R1	-0.598142	4.38548	2.1005	5.60147	2.08007	0.0108007	0.69339
CREB3L1	GDPD5	0.590714	2.74752	3.89975	5.60147	1.9851	0.00985096	0.693293
RUNX2	CACFD1	0.370815	0.72437	4.80239	5.60147	3.63749	0.0263749	0.693216
RFX1	SLC39A1	0.802502	3.91759	3.24974	5.60147	1.70859	0.00708585	0.692859
FOSB	RPS17	0.465695	1.54099	4.92398	5.60147	2.43624	0.0143624	0.692575
DLX5	RAB15	-0.518136	3.70822	5.05748	5.60147	1.73287	0.00732871	0.691258
HOXA7	SLC9B1	0.28687	2.95638	4.87199	5.60147	2.29828	0.0129828	0.690598
FOXD1	CAPS2	0.430556	1.27663	0.583404	1.73098	6.88771	0.180564	0.690339
NR3C1	INSC	0.235334	3.10809	5.0126	0.462593	4.21891	0.0964166	0.689911
BHLHE41	CDKN2C	0.958215	3.15116	4.16484	5.60147	1.60873	0.00608732	0.689834
TCF7L2	OMD	0.435053	3.11301	4.95586	5.60147	1.94351	0.00943509	0.689408
TCF7L2	SCN3A	0.75031	3.11301	4.43071	1.70289	1.3774	0.0283602	0.688418
IRF6	NGF	-0.122869	4.42622	1.43446	5.60147	4.49955	0.0349955	0.688094
HOXB4	EN1	0.241848	4.14778	4.48242	2.65027	1.52969	0.0377157	0.687522
DLX3	RAB6A	0.488546	4.29274	4.32632	5.60147	1.76538	0.00765381	0.686715
PRRX2	MLC1	0.572241	0.497948	5.17329	5.60147	3.42525	0.0242524	0.685928
TCF7L2	FBXL19	-0.636363	3.11301	4.92923	5.60147	1.72602	0.00726021	0.685427
BACH2	TDP1	0.529558	2.61301	4.90241	2.06737	1.6979	0.0287185	0.683845
FOXD1	SPRYD3	0.808647	1.27663	4.48363	1.02103	2.62765	0.0550552	0.683691
NR3C1	DLX1	0.362935	3.10809	4.9423	0.97809	3.56666	0.0350609	0.681891
DLX3	RAD18	-0.390817	4.29274	4.20001	1.36021	2.9007	0.024503	0.681221
BACH2	ARFIP2	-0.306637	2.61301	4.40211	5.60147	2.42281	0.0142281	0.681074
AR	HSPA8	-0.222987	1.92918	3.25298	5.60147	3.4897	0.024897	0.681039
DLX1	ARHGAP42	-0.497174	4.35323	3.30225	5.60147	1.89621	0.00896207	0.68034
DLX2	TTYH3	-0.391154	4.30221	4.55325	5.60147	1.85445	0.00854446	0.680083
EGR3	MFAP3L	0.890857	4.31292	4.20433	5.60147	1.50078	0.00500783	0.680056
HOXC5	SLC9B1	0.466188	4.44425	4.87199	5.60147	1.70519	0.00705191	0.679904
CEBPB	ZNF436	0.339874	2.71424	4.51818	5.60147	2.27758	0.0127758	0.679354
ATF1	HIVEP3	0.760251	1.99475	2.31402	5.60147	2.42276	0.0142276	0.677573
NFE2	CPEB1	0.274657	4.45978	4.6182	0.74841	3.84719	0.0415849	0.677321
JUNB	L3MBTL3	-0.450444	1.79628	4.0342	5.60147	2.48857	0.0148857	0.677318
MAF	GPRC5A	-0.488525	1.38103	1.61589	5.60147	3.86737	0.0286737	0.677178
FOSB	LRRC6	0.204268	1.54099	4.14881	5.60147	3.58259	0.0258259	0.676827
FOXD1	TMEM243	-0.556733	1.27663	3.92821	5.60147	2.63857	0.0163857	0.676147
RARG	PALB2	-0.354919	1.94154	4.46877	5.60147	2.54111	0.0154111	0.675498
PRDM1	RFX8	-0.132613	4.49923	1.84857	3.08409	3.21792	0.0616774	0.675132
DLX2	ZNF793	0.478501	4.30221	4.90365	5.60147	1.70154	0.00701544	0.674984
TEAD2	SLC46A3	0.760538	3.77835	3.93061	0.434141	3.62332	0.0379901	0.67498
HOXB5	PLXNA4	0.22078	3.41131	1.79421	5.60147	3.52765	0.0252765	0.674931
DLX5	ETFB	-0.456267	3.70822	1.2047	0.527283	7.93981	0.0790717	0.674741
NFATC1	MLC1	0.303317	3.8531	5.17329	5.60147	1.99678	0.00996781	0.674071
GLI3	COL4A4	-0.387265	1.32817	4.02361	5.60147	2.95983	0.0195983	0.672456
MAFB	HDAC3	-0.543539	3.57308	3.77203	5.60147	1.87431	0.00874312	0.672449
RUNX3	TXLNB	0.327377	4.38548	5.10041	0.700491	3.17911	0.0412214	0.672204
DLX6	ARHGAP20	-0.288147	4.33859	0.77057	5.60147	4.0639	0.030639	0.671886
FOXD1	MAP3K7CL	-0.72628	1.27663	2.08236	2.35988	1.25974	0.116934	0.671174
AR	KIAA0319	0.837004	1.92918	5.11658	1.16117	1.91974	0.0363807	0.670021
HOXA11	KLKB1	-0.14568	3.2013	3.18301	5.60147	3.38188	0.0238188	0.669797
DLX6	GNG7	-0.242203	4.33859	4.48666	5.60147	2.16908	0.0116908	0.669692
AR	C9orf116	0.930868	1.92918	5.12118	5.60147	1.74455	0.00744549	0.669128
TCF7	RRP15	-0.142554	4.32491	3.06257	5.60147	3.06391	0.0206391	0.668821
MAFB	BLCAP	-0.547253	3.57308	2.83458	2.81249	2.2139	0.0193754	0.668685
FOS	KIAA0408	0.476795	2.01181	4.89072	0.895313	2.5627	0.0620816	0.668235
HOXC8	TPX2	-0.444669	1.76895	3.66762	5.60147	2.59338	0.0159338	0.667771
RUNX3	LURAP1L	-0.398752	4.38548	2.85432	0.435883	5.16968	0.0593205	0.667206
DLX5	FYN	0.444371	3.70822	3.64862	1.69016	2.43725	0.0269062	0.666378
SIX4	PRKG1	-0.48689	4.05726	2.96644	5.60147	2.00871	0.0100871	0.665098
TCF7	KCTD19	0.590875	4.32491	5.1617	5.60147	1.57213	0.00572129	0.664585
FOXC1	ZNF235	0.313948	0.909762	3.50723	5.60147	3.97759	0.0297759	0.664566
AR	KATNAL2	-0.244755	1.92918	3.34172	5.60147	3.28692	0.0228692	0.664381
DLX3	DIRC3	0.507038	4.29274	2.49857	0.396807	5.60121	0.0549424	0.664104
SIX1	ZBTB22	0.479335	2.03212	4.59947	5.60147	2.20137	0.0120137	0.663698
CEBPB	MEAF6	0.45358	2.71424	3.96709	5.60147	2.13566	0.0113566	0.663523
DLX6	LRRC8B	0.43686	4.33859	5.08239	5.60147	1.71638	0.00716379	0.663464
FOS	PLEKHM3	0.490644	2.01181	2.74609	5.60147	2.64919	0.0164919	0.663367
AR	EPHB1	0.582616	1.92918	4.74778	0.764021	3.40277	0.0477859	0.662953
AR	PCDHGA12	-0.362746	1.92918	3.36693	0.851517	5.58782	0.0590758	0.662301
DLX2	PLAG1	0.483403	4.30221	1.95713	5.60147	2.2759	0.012759	0.662052
TCF7	CAMTA1	-0.665036	4.32491	1.57542	5.60147	2.18959	0.0118959	0.661118
CREB3L1	ZIC1	0.709288	2.74752	1.47999	1.49142	4.43822	0.0346115	0.660774
MAF	ERCC2	-0.633015	1.38103	3.2915	5.60147	2.58355	0.0158355	0.65942
BACH2	TSPAN18	0.373774	2.61301	3.25695	0.459095	4.94206	0.0911746	0.65803
TEAD2	IRGQ	-0.352655	3.77835	4.48674	5.60147	1.98814	0.0098814	0.657887
EGR2	ARMCX4	0.213863	3.58251	2.39465	5.60147	3.07903	0.0207903	0.657871
ZIC4	ADAMTS10	0.961025	3.73784	3.24635	0.805761	1.47822	0.047361	0.657834
TEAD2	CYP27C1	0.608672	3.77835	4.17933	2.40045	1.60834	0.0177255	0.657749
DLX1	PIP4K2A	0.578409	4.35323	1.77841	5.60147	2.19429	0.0119429	0.657327
MAFB	ZNF138	0.366463	3.57308	4.16289	5.60147	2.04932	0.0104932	0.656579
DLX3	SLC3A1	-0.358826	4.29274	4.90876	0.846105	2.20759	0.0464879	0.65656
JUNB	TAF3	-0.595702	1.79628	1.03082	5.60147	3.79656	0.0279656	0.655996
RUNX3	CEP152	0.638417	4.38548	4.60479	0.39536	3.7955	0.0338891	0.655621
MAFB	LYSMD3	-0.287401	3.57308	4.3379	5.60147	2.19605	0.0119605	0.655398
HOXD3	ZNF45	0.178774	2.64755	4.86919	5.60147	2.80793	0.0180793	0.655353
RUNX3	BMP4	-0.407428	4.38548	4.42661	1.70101	1.91919	0.0253534	0.654636
PRRX2	AKAP17A	-0.38499	0.497948	4.45929	5.60147	4.22657	0.0322657	0.653025
TCF7L2	NIP7	-0.463008	3.11301	4.68585	5.60147	1.90475	0.00904751	0.651968
TCF7L2	CD36	-0.35151	3.11301	3.60275	5.60147	2.28888	0.0128888	0.651462
CEBPA	SLC35C1	-0.532201	4.22504	4.79715	5.60147	1.6522	0.00652198	0.651078
TCF7L2	ZFYVE28	0.597918	3.11301	2.09687	5.60147	2.29651	0.0129651	0.650941
MAFB	NDRG4	0.572715	3.57308	5.16926	5.60147	1.66071	0.00660711	0.650157
TEAD2	ANKS1B	-0.596374	3.77835	1.67235	5.60147	2.32447	0.0132447	0.649852
MAFB	FRK	-0.487686	3.57308	4.50799	0.367135	4.96948	0.0453292	0.649653
FOXD1	KANK4	0.389302	1.27663	5.17187	5.60147	2.6819	0.016819	0.64945
DLX1	TRABD2A	-0.245442	4.35323	5.02934	5.60147	2.05067	0.0105067	0.648534
RFX1	ATXN7L3B	0.716226	3.91759	2.44248	5.60147	1.89258	0.00892582	0.648493
MAFB	COG2	-0.291395	3.57308	4.16284	5.60147	2.20838	0.0120838	0.647882
HOXC4	ZNF783	0.49723	3.76201	3.69252	5.60147	1.88695	0.00886951	0.647534
FOXD1	NFE2	0.521132	1.27663	5.08595	5.60147	2.41452	0.0141452	0.64733
FOSB	TPCN2	0.549728	1.54099	4.79796	0.448032	5.16258	0.0688319	0.647099
FOXD1	ZNF106	0.693043	1.27663	2.22733	2.24756	3.51867	0.0415133	0.646976
HOXD3	DNAJC6	0.726367	2.64755	1.56569	1.33569	1.66555	0.0965381	0.646649
MAFB	LRRFIP2	0.456405	3.57308	4.15829	5.60147	1.89717	0.00897174	0.646538
HOXA6	AKAP17A	-0.409683	3.43908	4.45929	5.60147	1.94444	0.00944439	0.646288
DLX3	GLIS1	0.658959	4.29274	2.9764	0.998931	1.22488	0.0626796	0.645711
NFE2L2	SHROOM4	-0.33454	2.63744	4.73637	5.60147	2.23442	0.0123442	0.64566
CEBPA	DSP	0.795912	4.22504	4.35418	5.60147	1.51823	0.00518229	0.645304
NFE2	GLI2	0.23134	4.45978	2.32909	1.3085	2.95755	0.0693758	0.645156
SIX4	NGF	-0.168756	4.05726	1.43446	5.60147	3.95936	0.0295936	0.644621
HOXC10	GBP1	-0.694396	3.52125	2.47146	5.60147	1.96766	0.00967658	0.644512
MAFB	EFS	0.466519	3.57308	4.04133	0.759321	3.34965	0.0375881	0.644039
FOS	GPATCH3	0.749247	2.01181	5.01142	5.60147	1.83029	0.00830293	0.643024
HOXA3	ZNF45	0.457774	1.22036	4.86919	5.60147	2.61361	0.0161361	0.642596
FOXD1	SUPT4H1	0.875438	1.27663	4.02247	5.60147	2.17368	0.0117368	0.642437
DLX5	ST3GAL2	-0.359592	3.70822	2.97045	5.60147	2.27356	0.0127356	0.642427
AR	WHAMM	-0.219475	1.92918	4.31622	0.775972	6.52954	0.0692836	0.641536
RUNX2	GPR85	0.365282	0.72437	5.0457	2.96877	1.99039	0.0812908	0.641309
ZIC1	YKT6	0.465618	1.10959	3.38421	5.60147	3.10667	0.0210667	0.640977
RUNX3	METTL6	-0.460858	4.38548	3.61454	1.80952	2.4343	0.0199058	0.64055
CEBPA	TRABD2A	-0.365578	4.22504	5.02934	5.60147	1.81109	0.00811092	0.639198
DLX5	COX14	-0.461619	3.70822	1.91028	5.60147	2.43374	0.0143374	0.639136
RFX1	PRKD2	0.88088	3.91759	4.21056	5.60147	1.51711	0.00517111	0.638527
TCF7	OSBPL6	-0.554131	4.32491	3.06029	5.60147	1.84193	0.0084193	0.637093
BHLHE41	HOXD9	0.686849	3.15116	4.45796	0.936183	2.69992	0.0261003	0.636538
HOXA6	KCNK15	0.312105	3.43908	4.47178	5.60147	2.11709	0.0111709	0.63585
HOXC8	PPID	0.872598	1.76895	3.52545	5.60147	2.02791	0.0102791	0.635401
DLX3	TPX2	-0.58938	4.29274	3.66762	0.57523	3.75379	0.0316716	0.634593
FOXD1	FAM110A	0.753977	1.27663	4.5442	5.60147	2.18457	0.0118457	0.634028
HOXB9	MRPL15	0.774809	4.39238	4.38801	5.60147	1.50345	0.00503453	0.633159
ATF7	PLXNA4	0.212526	1.58256	1.79421	5.60147	4.85605	0.0385605	0.632956
CREM	GSTO2	0.335907	3.39993	4.88713	5.60147	2.00748	0.0100748	0.632312
RUNX3	MRPS34	0.52881	4.38548	1.61174	5.60147	2.30828	0.0130828	0.632272
FOXC1	ENKUR	0.636176	0.909762	3.97036	0.501611	3.59513	0.152279	0.631038
DLX5	CALU	-0.482796	3.70822	3.54574	5.60147	1.92195	0.00921954	0.630073
HOXD3	ZNF793	0.513432	2.64755	4.90365	5.60147	1.89073	0.00890734	0.628819
HOXC10	FANCF	0.753502	3.52125	4.92074	5.60147	1.55337	0.0055337	0.628643
FOXD1	PFKFB4	-0.696846	1.27663	4.80703	0.856485	3.9441	0.0434537	0.62773
RUNX3	SCN9A	-0.235698	4.38548	1.27872	5.60147	3.45331	0.0245331	0.627247
CEBPA	ARHGAP42	-0.412465	4.22504	3.30225	5.60147	1.98183	0.00981834	0.627243
DLX5	EFHB	0.609846	3.70822	5.14592	5.60147	1.60033	0.00600332	0.626256
FOXD1	TMEM182	0.162721	1.27663	4.63725	5.60147	3.94267	0.0294267	0.626041
TCF7L2	LRRC8E	0.466811	3.11301	4.99396	5.60147	1.83742	0.00837419	0.625488
RFX1	ITGA11	0.280848	3.91759	2.48004	5.60147	2.58362	0.0158362	0.625359
HOXB8	C8orf82	0.82585	4.1156	4.83271	5.60147	1.46402	0.00464023	0.62505
JUNB	IQSEC2	0.746208	1.79628	4.56105	5.60147	1.94054	0.00940536	0.625025
TCF7L2	PELO	-0.781237	3.11301	4.52641	0.393541	3.9969	0.0360693	0.624552
DLX5	HIVEP2	0.781711	3.70822	1.73747	4.39477	1.37163	0.0205605	0.624223
MAFB	PRKD3	-0.541541	3.57308	2.00328	5.60147	2.26772	0.0126772	0.624214
BACH2	TSPAN10	-0.201864	2.61301	4.28878	5.60147	2.77451	0.0177451	0.623879
DLX3	EFS	0.408862	4.29274	4.04133	0.438482	4.21037	0.0476307	0.623728
DLX4	MR1	0.652301	4.51015	2.86804	5.60147	1.75186	0.00751863	0.622536
HOXB5	ZFHX4	0.467087	3.41131	2.49345	1.03903	2.92414	0.0515457	0.622213
MAF	LRMP	0.560564	1.38103	5.17365	5.60147	2.23814	0.0123814	0.621699
MAFB	LYNX1	0.814125	3.57308	3.53108	0.205858	5.80628	0.0505735	0.620912
HOXA6	IQSEC2	0.694117	3.43908	4.56105	5.60147	1.62473	0.00624729	0.619034
ZIC1	AKAP17A	-0.102201	1.10959	4.45929	5.60147	5.2013	0.042013	0.618983
DLX2	PLEKHH3	-0.375443	4.30221	4.1032	5.60147	1.88378	0.00883784	0.618069
HOXA11	TNIP3	0.542189	3.2013	5.16725	5.60147	1.71665	0.00716654	0.61806
RFX1	METTL16	-0.54741	3.91759	2.75634	5.60147	1.95408	0.00954084	0.6173
DLX2	ANKRD50	0.420409	4.30221	1.02965	5.60147	2.98278	0.0198278	0.61695
TCF7	GIPC2	-0.273101	4.32491	4.18705	5.60147	2.07369	0.0107369	0.616783
NFE2	CDK15	0.383863	4.45978	4.60727	0.701714	2.58276	0.0431196	0.616386
MAFB	AFAP1	-0.431723	3.57308	4.42002	2.64907	1.11353	0.0306269	0.615986
EGR3	UNC79	0.530897	4.31292	5.11741	0.950357	2.23656	0.0247242	0.615775
TCF7	ZFHX3	0.621305	4.32491	3.1411	5.60147	1.74568	0.0074568	0.615435
CREM	SMIM20	0.69744	3.39993	4.41565	5.60147	1.63986	0.00639863	0.615415
SP7	EN1	0.199873	4.52729	4.48242	5.60147	2.22	0.0122	0.615349
TCF7L2	CORIN	-0.135761	3.11301	4.83168	5.60147	2.87173	0.0187173	0.614813
HOXA6	HTR7	-0.622855	3.43908	4.05307	0.586941	2.064	0.0584243	0.614484
HOXA2	PAX9	0.739715	4.36219	4.22626	5.60147	1.52571	0.00525713	0.612701
DLX6	MYH11	-0.155648	4.33859	4.85345	5.60147	2.39387	0.0139387	0.612589
DLX2	TSHZ2	0.501213	4.30221	2.23221	5.60147	2.0875	0.010875	0.612076
DLX5	ZNF398	0.667146	3.70822	4.08191	5.60147	1.65411	0.00654107	0.612018
BHLHE41	SIM2	0.787384	3.15116	5.04855	0.786993	2.5449	0.0243817	0.611686
TEF	MPP4	-0.290137	2.8919	4.94421	3.2872	2.38036	0.0188213	0.610946
PGR	SLC46A3	0.459298	4.5244	3.93061	5.60147	1.75847	0.00758466	0.610221
JUNB	HOXC6	-0.361811	1.79628	2.70229	0.298237	10.9192	0.106565	0.609472
AR	COG2	-0.159779	1.92918	4.16284	5.60147	3.45168	0.0245168	0.608245
TCF7L2	KIAA1549L	-0.242938	3.11301	1.04267	0.77669	8.68983	0.114254	0.608066
DLX1	ZNF793	0.604881	4.35323	4.90365	5.60147	1.54418	0.00544175	0.607768
MAFB	CDK5RAP1	-0.452485	3.57308	4.51705	5.60147	1.81685	0.00816846	0.607104
SIX1	SLC35F5	-0.802511	2.03212	2.97571	5.60147	2.0736	0.010736	0.60515
HOXB5	DNAJA3	-0.649765	3.41131	4.39082	4.18889	1.81475	0.0081607	0.603761
RUNX3	MSANTD1	0.343941	4.38548	5.11739	5.60147	1.78236	0.00782362	0.602913
FOXD1	CBLN3	0.153804	1.27663	4.35806	5.60147	4.08082	0.0308082	0.602614
HOXC8	ZNF334	0.804686	1.76895	4.39074	0.936832	1.97823	0.0520068	0.602395
MAFG	SLC38A4	-0.163028	0.408594	4.85653	5.60147	6.28684	0.0528684	0.6023
SIX1	C20orf27	0.531458	2.03212	3.81695	5.60147	2.19026	0.0119026	0.601968
GATA2	FIBIN	-0.250879	4.45262	4.15308	1.75242	3.08746	0.0239375	0.600854
EGR3	ANKRD13C	0.812734	4.31292	1.49068	5.60147	2.01661	0.0101661	0.600043
HOXD3	ZNF783	0.408852	2.64755	3.69252	5.60147	2.21163	0.0121163	0.599951
TCF7L2	EPHB1	0.828831	3.11301	4.74778	0.443159	3.14799	0.0350904	0.599677
HEY2	ADAMTSL3	0.870152	4.16271	1.61427	0.532713	3.46199	0.0555981	0.599551
NFE2	RRP8	0.214462	4.45978	4.79547	5.60147	2.10717	0.0110717	0.599394
CEBPD	SHROOM3	0.369819	2.72658	3.38863	5.60147	2.33838	0.0133838	0.599005
AR	ISLR	0.545252	1.92918	2.96697	0.593386	1.51831	0.212871	0.598546
MAF	LRRC6	0.188068	1.38103	4.14881	5.60147	3.68799	0.0268799	0.598356
HOXD9	SPOCK1	0.717631	3.98373	1.97576	5.60147	1.96298	0.00962983	0.598085
DLX5	NPR3	0.223301	3.70822	1.6229	1.51565	2.12799	0.13766	0.596658
SIX4	EIF5AL1	0.527809	4.05726	5.16918	5.60147	1.60077	0.00600775	0.596314
TCF7	TANC1	-0.558391	4.32491	0.892331	5.60147	2.77796	0.0177796	0.596198
SIX1	RHOQ	-0.667999	2.03212	3.06396	5.60147	2.1716	0.011716	0.592749
HOXB5	TSHZ3	-0.662007	3.41131	1.98086	0.955572	2.31431	0.0598587	0.592176
NFE2	ZFYVE28	0.419607	4.45978	2.09687	1.15434	3.21399	0.0406107	0.591216
CEBPA	DNAJB2	0.651091	4.22504	4.05137	5.60147	1.59377	0.00593773	0.590777
HOXB5	CRYGS	0.665021	3.41131	5.07964	5.60147	1.57936	0.00579358	0.590635
TEAD2	ZNF398	0.424506	3.77835	4.08191	5.60147	1.86308	0.0086308	0.589703
BACH2	PPP2R5A	-0.440178	2.61301	3.47608	5.60147	2.19698	0.0119698	0.588945
TEAD2	SLC15A2	-0.569211	3.77835	5.06149	5.60147	1.60262	0.0060262	0.588884
PRDM1	KCTD16	-0.212365	4.49923	2.18097	2.61071	2.70182	0.0400559	0.588782
RUNX3	ZNF783	0.249213	4.38548	3.69252	5.60147	2.18911	0.0118911	0.588439
SIX1	PTH1R	0.515958	2.03212	4.87339	5.60147	2.01677	0.0101677	0.58692
MAFB	SLC9B1	0.187798	3.57308	4.87199	5.25159	2.41493	0.0141557	0.586902
TEAD2	WDR25	-0.603348	3.77835	3.82989	5.60147	1.7041	0.00704098	0.586794
NFATC1	OSBPL6	-0.423559	3.8531	3.06029	5.60147	2.03197	0.0103197	0.58664
DLX3	SPDL1	-0.507588	4.29274	4.50238	0.626931	3.48695	0.0272974	0.585432
AR	LHX4	0.573848	1.92918	5.14928	1.33374	1.76802	0.0434962	0.58469
RFX1	XPO1	-0.348201	3.91759	4.65947	5.60147	1.8753	0.00875298	0.584406
AR	FIBIN	-0.280215	1.92918	4.15308	4.00514	1.34569	0.0482749	0.58414
HOXB6	MEF2C	0.605404	2.66559	3.36399	2.43544	1.87606	0.0235494	0.584113
RFX1	PLAGL1	-0.70264	3.91759	2.3564	5.60147	1.86237	0.00862366	0.583527
PRDM1	MRS2	0.304927	4.49923	4.59088	5.60147	1.87972	0.00879721	0.583405
EGR2	ENO4	0.402792	3.58251	4.79943	0.463961	2.70505	0.0671092	0.583306
TEAD2	BCL11B	0.719692	3.77835	5.14801	0.434564	3.0888	0.0310291	0.583044
DLX2	SLC35C1	-0.484264	4.30221	4.79715	5.60147	1.63634	0.00636338	0.582935
MAFB	TBX15	-0.341974	3.57308	2.23456	0.557558	3.99673	0.0956288	0.581853
CEBPA	GLIS1	0.580451	4.22504	2.9764	0.459299	3.14615	0.0550198	0.580339
RFX1	CACFD1	0.710589	3.91759	4.80239	5.60147	1.51234	0.00512342	0.58024
DLX2	NPR3	0.507017	4.30221	1.6229	0.977596	2.62847	0.0637699	0.580077
TEAD2	MCCC1	-0.598544	3.77835	2.28651	1.36939	3.21235	0.025494	0.579912
MAFB	EGR3	0.711241	3.57308	4.901	0.46285	2.18004	0.0461332	0.579779
HOXB5	SKIDA1	0.465179	3.41131	5.14447	5.60147	1.73159	0.00731592	0.579293
MAF	MAP3K13	-0.26665	1.38103	2.10909	5.60147	4.18237	0.0318237	0.579047
AR	FBXL19	-0.540914	1.92918	4.92923	5.60147	2.00278	0.0100278	0.578656
TEF	EN1	0.596423	2.8919	4.48242	0.798658	2.47505	0.0378416	0.578316
MAF	COMMD4	-0.543424	1.38103	3.80767	5.60147	2.4652	0.014652	0.578166
HOXB4	ZIC1	0.948716	4.14778	1.47999	0.366139	5.39915	0.0500541	0.576266
DLX3	CMYA5	0.482199	4.29274	3.84217	0.94056	2.26168	0.0340336	0.575788
HOXB5	KRT34	-0.253254	3.41131	2.29419	0.465794	4.29863	0.144862	0.57489
DLX6	AFAP1	-0.300638	4.33859	4.42002	0.755671	2.16409	0.0608877	0.574056
HOXB4	C8orf82	0.910501	4.14778	4.83271	5.60147	1.40061	0.00400609	0.573624
NFE2	B3GAT2	0.37255	4.45978	5.0675	1.39985	2.56856	0.0189459	0.573557
FOXD1	NMNAT1	-0.501497	1.27663	4.74781	0.464424	3.84966	0.105348	0.57252
RUNX3	ZNF444	0.823144	4.38548	4.54943	5.60147	1.43398	0.00433983	0.57249
FOSB	SNX32	-0.223456	1.54099	4.26126	5.60147	3.1843	0.021843	0.57169
AR	CDH4	-0.368908	1.92918	4.18724	2.06424	1.17337	0.079195	0.571628
TCF7	THSD1	-0.537819	4.32491	3.52806	0.858318	1.87335	0.0433002	0.571355
FOSB	SNAPC2	-0.315249	1.54099	4.79605	5.60147	2.6509	0.016509	0.571152
AR	ITSN2	-0.374959	1.92918	2.41163	5.60147	2.96684	0.0196684	0.570205
TCF7	TXN2	0.488123	4.32491	3.16062	0.411386	4.59832	0.0451345	0.569686
DLX5	ZNF500	-0.228639	3.70822	4.49888	2.09951	3.20645	0.0221763	0.569445
NFE2	TSPAN18	0.252569	4.45978	3.25695	0.504116	4.30387	0.0714764	0.568928
EGR3	BCO2	0.964769	4.31292	4.97801	5.60147	1.35962	0.00359619	0.5673
SIX1	LRP12	-0.477914	2.03212	0.455593	5.60147	5.30969	0.0430969	0.567144
HOXA7	BOD1	0.336371	2.95638	4.44553	5.60147	2.09382	0.0109382	0.567137
EGR2	TUSC3	-0.444018	3.58251	3.09678	5.60147	2.01558	0.0101558	0.564827
SIX1	CCDC3	-0.446733	2.03212	4.73931	2.84267	2.70288	0.0170833	0.564729
ZIC1	PLXNA4	0.571046	1.10959	1.79421	5.60147	3.51944	0.0251944	0.564659
HOXD3	PID1	0.657138	2.64755	1.54645	5.60147	2.49899	0.0149899	0.564548
DLX5	RBL1	-0.533775	3.70822	4.30735	5.60147	1.69616	0.00696157	0.56391
SOX11	L3MBTL1	0.663386	4.4872	4.60506	5.60147	1.49183	0.0049183	0.563396
SIX1	METTL6	-0.522273	2.03212	3.61454	5.60147	2.19462	0.0119462	0.563367
BACH2	BEND7	0.671801	2.61301	2.67012	2.28527	1.4292	0.0367849	0.563134
NFE2	ZMYND15	0.439981	4.45978	5.09766	5.60147	1.62003	0.0062003	0.562802
HOXC10	TBX15	-0.402858	3.52125	2.23456	0.925655	3.75855	0.0510251	0.562726
DLX3	ACKR3	0.344123	4.29274	4.88828	0.317969	5.25804	0.0466001	0.562598
CEBPD	C17orf107	0.523049	2.72658	5.0177	5.60147	1.78571	0.00785708	0.562392
DLX6	SWSAP1	0.168945	4.33859	5.07606	5.60147	2.21705	0.0121705	0.562347
SIX4	LRRN3	0.324299	4.05726	4.9836	2.58807	1.20249	0.0275549	0.562312
EGR2	PTGS2	0.515416	3.58251	3.45909	1.24898	1.62477	0.0433344	0.561681
TCF7L2	RBM43	0.888642	3.11301	2.89954	0.95999	1.47612	0.0494123	0.561641
DLX6	ERBB4	-0.298261	4.33859	2.67854	1.28832	1.94531	0.0646503	0.561599
BHLHE41	SLC38A4	-0.188107	3.15116	4.85653	5.60147	2.4311	0.014311	0.561021
ZIC4	ICA1	0.429566	3.73784	5.13105	5.60147	1.7106	0.00710603	0.560965
HOXA11	KATNAL2	-0.348875	3.2013	3.34172	5.60147	2.2125	0.012125	0.560832
HOXA7	OSCAR	0.530657	2.95638	5.13377	5.60147	1.72129	0.0072129	0.560113
NFATC2	MYO5B	0.836147	3.38455	5.14763	3.49539	1.66026	0.00662335	0.55994
HOXA11	ALMS1	0.776573	3.2013	1.93734	5.60147	2.0248	0.010248	0.559804
HNF4G	ACE	0.632885	3.58529	4.40354	5.60147	1.61772	0.00617718	0.559303
FOSB	RAB33A	0.354187	1.54099	5.01117	0.451886	5.57087	0.0812109	0.559164
JUNB	PCDHGA12	-0.494396	1.79628	3.36693	5.60147	2.39382	0.0139382	0.558836
MAFB	MAST3	0.782737	3.57308	4.43133	0.91793	2.01225	0.0243756	0.558008
RUNX3	SLC35F1	-0.149406	4.38548	1.5851	0.729551	4.40566	0.167073	0.557714
HOXB8	ZNF783	0.468335	4.1156	3.69252	5.60147	1.7836	0.00783604	0.557197
DLX4	ANKRD35	0.152344	4.51015	4.38505	5.60147	2.3844	0.013844	0.557102
ESR1	COL22A1	0.282483	2.29749	5.16825	5.60147	2.28982	0.0128982	0.554908
DLX5	SLC15A2	-0.277797	3.70822	5.06149	5.60147	1.96607	0.00966067	0.554727
AR	FAM214B	-0.571224	1.92918	2.28038	0.44131	6.33364	0.0789725	0.5547
NR3C1	SDK2	0.669617	3.10809	5.16346	5.60147	1.58187	0.00581867	0.554059
TEF	HOXD9	0.750062	2.8919	4.45796	1.36399	2.5955	0.0161809	0.553927
RUNX3	CORO1C	-0.703667	4.38548	4.41903	1.52039	1.28607	0.0207502	0.553289
SIX4	MRPL15	0.577176	4.05726	4.38801	5.60147	1.60051	0.00600508	0.553206
BACH2	ZDHHC18	-0.19683	2.61301	4.86874	5.60147	2.54777	0.0154777	0.553114
HOXC10	FGFR2	0.654642	3.52125	1.59024	1.0715	1.37743	0.102208	0.552979
RFX1	COPRS	0.656113	3.91759	1.64387	5.60147	2.10776	0.0110776	0.552629
HOXC4	SKIDA1	0.509221	3.76201	5.14447	5.60147	1.61849	0.00618491	0.552603
TCF7L2	DUSP19	0.515568	3.11301	4.92026	5.60147	1.72425	0.00724245	0.552384
DLX2	C4orf3	0.618849	4.30221	2.8231	5.60147	1.7496	0.00749603	0.552175
AR	KIAA1549L	-0.266736	1.92918	1.04267	0.964543	3.6862	0.2892	0.551696
CEBPD	ST3GAL4	-0.459326	2.72658	4.76579	5.60147	1.87787	0.00877874	0.551157
DLX6	GLIPR1L1	0.556842	4.33859	5.01925	0.977382	2.25979	0.0205707	0.550937
PRRX2	GYG2	0.573528	0.497948	4.9312	5.60147	3.18559	0.0218559	0.549226
MAFB	SCAF4	-0.154882	3.57308	2.8629	5.60147	3.03709	0.0203709	0.549059
DLX3	MARK1	0.398901	4.29274	2.96929	0.463044	3.28141	0.0710609	0.548991
CEBPA	EXTL1	-0.275148	4.22504	3.89325	5.60147	2.05252	0.0105252	0.547686
MAFB	PLEKHN1	0.763207	3.57308	5.16186	5.60147	1.4719	0.00471903	0.547678
ATF4	GSTO2	0.540933	3.4823	4.88713	5.60147	1.64533	0.00645329	0.54752
MAF	LRRC8B	0.366811	1.38103	5.08239	5.60147	2.51157	0.0151157	0.547505
DLX1	ZNF45	0.451614	4.35323	4.86919	5.60147	1.62719	0.00627187	0.547233
DLX3	CCND3	-0.527047	4.29274	4.53894	2.51591	2.03511	0.0104029	0.546984
HOXC10	MEX3B	0.591097	3.52125	4.6469	5.60147	1.62224	0.00622242	0.546886
HOXD3	LZTFL1	0.635268	2.64755	4.45144	4.1986	1.32973	0.0130706	0.546344
BACH2	RIN1	-0.269218	2.61301	4.57754	5.60147	1.22357	0.0247375	0.545964
DLX5	LMO4	0.771995	3.70822	2.07027	5.60147	1.87571	0.00875713	0.545303
MAFB	BCAP29	-0.752881	3.57308	1.42898	5.60147	2.16797	0.0116797	0.545232
SIX1	CC2D2B	0.166007	2.03212	5.02509	5.60147	2.9464	0.019464	0.544564
SIX4	SYT12	0.354936	4.05726	3.77174	5.60147	1.9281	0.00928103	0.544443
DLX3	SHQ1	-0.509351	4.29274	4.03583	0.418247	3.94303	0.0373744	0.543903
RFX1	RALGAPA1	-0.477677	3.91759	3.25267	5.60147	1.85785	0.00857845	0.543394
IRF6	LYNX1	0.1168	4.42622	3.53108	5.60147	2.85755	0.0185755	0.542774
MAFB	GXYLT2	-0.440853	3.57308	1.25229	0.598329	6.27589	0.0731882	0.542123
HOXD9	PLCE1	0.703309	3.98373	0.507643	5.60147	3.15466	0.0215466	0.541535
HOXC8	TRPA1	-0.318772	1.76895	4.86609	3.2856	1.6819	0.0356982	0.541301
HOXA6	DGKG	0.593718	3.43908	4.19863	1.09692	2.5535	0.0225421	0.541297
RFX1	CHD4	0.829835	3.91759	3.01633	5.60147	1.61133	0.0061133	0.541069
HOXC10	IRGQ	-0.311719	3.52125	4.48674	5.60147	1.98686	0.0098686	0.540901
AR	PLAC9	-0.223676	1.92918	1.1206	0.624182	6.46182	0.277242	0.540712
RUNX3	MOK	0.938965	4.38548	1.47739	0.479347	4.07781	0.0454418	0.540374
AR	RAD9A	0.753512	1.92918	3.4192	0.45367	4.05084	0.0590932	0.539771
MAFB	ZNF436	0.305296	3.57308	4.51818	2.25768	2.7533	0.0176169	0.539725
CEBPD	INSC	0.223747	2.72658	5.0126	0.639591	3.71132	0.0742715	0.539128
JUNB	TMCO4	0.56142	1.79628	3.47293	5.60147	2.2308	0.012308	0.538648
HOXA6	TCF7	0.894816	3.43908	4.98428	0.974817	1.65265	0.0217836	0.538286
HOXB5	SPOCK1	0.716972	3.41131	1.97576	5.60147	1.9959	0.00995896	0.538037
HOXB8	PYROXD2	-0.375964	4.1156	4.41649	5.60147	1.78647	0.0078647	0.53782
HOXC8	QPCT	0.199751	1.76895	4.54336	5.60147	2.99568	0.0199568	0.537614
MAFB	KIF23	-0.606511	3.57308	4.68996	0.411017	3.72048	0.034563	0.537181
DLX5	OXTR	-0.386402	3.70822	2.2533	1.00778	4.18665	0.0393967	0.536684
EGR3	SPDYA	0.851523	4.31292	4.99917	0.40705	2.91865	0.0245959	0.536486
FOS	PELO	-0.711984	2.01181	4.52641	0.362331	5.01193	0.0455471	0.53627
TCF7L2	HSH2D	0.402828	3.11301	5.15922	5.60147	1.81509	0.00815088	0.536152
SOX11	ESR1	0.432254	4.4872	2.90982	5.60147	1.89444	0.0089444	0.535692
EGR2	SIM2	0.453708	3.58251	5.04855	0.636716	2.81235	0.036454	0.535662
HOXA11	NR6A1	0.620156	3.2013	2.95546	5.60147	1.87102	0.00871018	0.535624
TCF7	GCNT4	-0.251507	4.32491	4.97042	5.60147	1.92005	0.00920046	0.534987
MAF	EFS	0.610794	1.38103	4.04133	0.938793	3.22521	0.0518298	0.534969
NFE2	TMCO4	0.42924	4.45978	3.47293	0.63621	3.64474	0.0346827	0.534675
HOXD3	SCN2A	0.292684	2.64755	4.91006	0.610874	2.42993	0.0945621	0.534063
MAFB	ACOX1	0.779864	3.57308	3.20201	5.60147	1.64805	0.00648054	0.533789
HOXB8	DPAGT1	0.939233	4.1156	4.33957	5.60147	1.40445	0.00404454	0.533743
DLX6	DPT	0.153198	4.33859	5.06057	0.94352	3.27894	0.0511997	0.532785
AR	MCU	0.597267	1.92918	3.49895	3.46294	1.80571	0.0211308	0.532707
NFE2	HLX	0.589698	4.45978	4.99999	1.61376	1.71881	0.0146042	0.532669
HOXB9	EPM2AIP1	0.801444	4.39238	2.70743	5.60147	1.61686	0.00616861	0.532466
HOXA4	OSBPL6	-0.362816	4.30094	3.06029	5.60147	1.99643	0.00996428	0.532126
RFX1	KRT17	-0.38935	3.91759	3.51699	1.56288	3.05922	0.0207427	0.532023
NFE2	TBXA2R	0.591509	4.45978	5.13718	1.17367	2.12781	0.0156944	0.53116
TEF	KCNMB1	0.322755	2.8919	5.14918	5.60147	1.99054	0.00990539	0.53081
HOXD3	HOXA7	0.409959	2.64755	3.43369	1.08791	1.69142	0.0773835	0.530686
HOXB9	MR1	0.499024	4.39238	2.86804	5.60147	1.82552	0.00825524	0.530671
HOXB5	ATXN7L3B	0.83852	3.41131	2.44248	5.60147	1.76698	0.00766983	0.530378
AR	TXN2	0.670383	1.92918	3.16062	0.580907	3.19155	0.0699817	0.530348
DLX3	ARPC5	-0.45392	4.29274	3.57561	5.60147	1.76821	0.00768389	0.530251
FOS	SLC25A37	0.248295	2.01181	2.81194	5.60147	3.1428	0.021428	0.52986
CEBPA	GSTO2	0.130717	4.22504	4.88713	5.60147	2.43762	0.0143762	0.529822
TCF7L2	RAB40A	0.55512	3.11301	5.03876	0.433244	3.66749	0.0382866	0.529712
HOXC8	STK33	0.577435	1.76895	4.97376	2.10473	1.85265	0.0267378	0.529686
TCF7	PELO	-0.543213	4.32491	4.52641	0.354813	4.0533	0.0346345	0.529684
AR	SYDE2	0.460392	1.92918	4.07554	0.46139	3.92138	0.0808537	0.529533
HOXA11	KRT34	-0.297769	3.2013	2.29419	0.464577	4.30082	0.121167	0.529455
RUNX3	ARHGAP8	0.410311	4.38548	5.04934	5.60147	1.63573	0.00635733	0.529241
DLX6	NCKAP5L	-0.361441	4.33859	3.93799	0.436776	4.19961	0.0466946	0.528926
AR	RUNX3	0.281378	1.92918	4.99938	1.6936	1.33243	0.0863334	0.528703
TCF7	IL17RC	-0.42139	4.32491	3.65939	0.433586	4.1158	0.0443107	0.527361
CEBPA	PRDM1	0.600674	4.22504	5.14719	5.60147	1.4851	0.00485101	0.527145
DLX5	MARK1	0.438631	3.70822	2.96929	0.470458	2.66957	0.0867535	0.52622
RUNX3	RFESD	-0.435268	4.38548	5.12861	5.60147	1.59971	0.00599711	0.526088
SMAD2	KLHL3	0.465779	3.2745	4.3047	5.60147	1.79561	0.00795611	0.52539
HOXC8	HSBP1	0.576882	1.76895	3.16138	5.60147	2.27661	0.0127661	0.525207
ATF6	PLXNA4	0.102393	3.50059	1.79421	5.60147	4.35071	0.0335071	0.525149
NFATC1	KATNAL2	-0.44874	3.8531	3.34172	5.60147	1.86782	0.00867822	0.524619
FOXD1	NFIB	-0.814293	1.27663	3.66984	2.15232	1.18694	0.0537657	0.524002
MAFB	ZNF415	0.40541	3.57308	4.70267	5.60147	1.77294	0.00772936	0.522902
HOXB5	CMIP	0.440173	3.41131	2.73953	5.60147	2.08677	0.0108677	0.522558
DLX2	PPARG	-0.364151	4.30221	2.98718	5.60147	1.996	0.00996	0.521142
PRDM1	GFRA1	0.32998	4.49923	1.7564	5.60147	2.4526	0.014526	0.520384
TEF	C16orf46	0.693428	2.8919	5.06131	0.947813	1.75337	0.0308375	0.520144
CEBPB	GLIS1	0.596753	2.71424	2.9764	1.06075	2.70575	0.037498	0.518853
TCF7L2	TTF1	0.799398	3.11301	2.67438	0.410079	4.42556	0.0428715	0.517811
RFX1	PSD3	-0.627248	3.91759	3.14866	5.60147	1.70157	0.00701565	0.517373
FOSB	RAD54B	-0.271928	1.54099	5.07806	5.60147	2.6416	0.016416	0.516879
HOXB5	PLEKHA2	0.54594	3.41131	3.23019	5.60147	1.83455	0.00834552	0.515916
CEBPA	MRPS12	-0.472305	4.22504	4.32462	5.60147	1.64751	0.00647513	0.51568
TCF7L2	SLC35F5	-0.697463	3.11301	2.97571	5.60147	1.79418	0.00794176	0.515676
CEBPA	C17orf107	0.373391	4.22504	5.0177	5.60147	1.68865	0.00688651	0.515633
AR	GPATCH3	0.359657	1.92918	5.01142	5.60147	2.20179	0.0120179	0.515382
SP1	EN1	0.665261	1.99002	4.48242	0.851923	3.11214	0.0327154	0.514722
AR	CPEB1	0.433239	1.92918	4.6182	0.65717	3.18252	0.0637222	0.514413
RFX1	FAM110A	0.569857	3.91759	4.5442	5.60147	1.57481	0.00574813	0.5144
HOXA3	OSBPL6	-0.379181	1.22036	3.06029	5.60147	3.09351	0.0209351	0.51372
BACH2	GRAMD1C	-0.274172	2.61301	4.63459	5.60147	2.23518	0.0123518	0.513477
MAFB	IL17RD	0.185144	3.57308	5.13507	5.60147	2.21688	0.0121688	0.513323
MAFB	SNX13	0.537711	3.57308	2.99688	1.50356	1.70105	0.0348427	0.513112
AR	RPL23	0.748913	1.92918	3.12025	5.60147	2.00998	0.0100998	0.512625
NFE2	RRAGD	0.264534	4.45978	4.85002	5.60147	1.85961	0.00859612	0.512347
BACH2	FBXO27	0.518361	2.61301	4.56382	0.70832	1.42723	0.0819085	0.511863
TEAD1	MFAP5	0.658172	4.96476	2.7865	0.959249	1.42039	0.0412468	0.511712
DLX1	MYH11	-0.5174	4.35323	4.85345	5.60147	1.54161	0.00541605	0.511265
FOSB	DHTKD1	0.561546	1.54099	4.77988	5.60147	2.0671	0.010671	0.511059
FOSB	TAF3	-0.113774	1.54099	1.03082	5.60147	7.6172	0.066172	0.510271
IKZF2	OMD	0.411459	2.78664	4.95586	5.60147	1.86116	0.00861164	0.510152
HOXA6	PITX2	-0.518583	3.43908	3.05551	0.924416	2.67546	0.0378509	0.510136
BACH2	GAR1	0.268799	2.61301	4.07851	0.393621	6.71046	0.0673573	0.509666
MAFB	FAM135A	0.743767	3.57308	2.82869	5.60147	1.70769	0.00707693	0.508888
AR	CD36	-0.240765	1.92918	3.60275	5.60147	2.88246	0.0188246	0.508614
FOSB	PPP1R10	0.507435	1.54099	2.20652	5.60147	2.84748	0.0184748	0.508431
FOXD1	ARHGAP8	0.288919	1.27663	5.04934	5.60147	2.76315	0.0176315	0.508243
HOXB6	IQSEC2	0.818071	2.66559	4.56105	5.60147	1.57788	0.00577879	0.507998
HEY2	DLX4	0.491419	4.16271	5.15717	1.5708	1.98185	0.015435	0.506916
AR	SNX33	-0.344867	1.92918	3.73206	5.60147	2.47339	0.0147339	0.506858
HOXC8	INSC	0.296954	1.76895	5.0126	0.481358	3.99023	0.100052	0.506011
PRDM1	OTUD4	0.231586	4.49923	2.75857	5.60147	2.34189	0.0134189	0.505962
SP2	WDR25	-0.300667	4.03015	3.82989	5.60147	1.98175	0.00981751	0.50576
HOXB8	SPOCK1	0.773091	4.1156	1.97576	5.60147	1.79801	0.00798013	0.505246
MAF	EFHB	0.448936	1.38103	5.14592	5.60147	2.25365	0.0125365	0.504907
SIX1	DOK1	0.530285	2.03212	3.41944	5.60147	2.14094	0.0114094	0.504176
DLX5	CPM	0.868707	3.70822	5.13515	5.60147	1.39099	0.00390991	0.503948
SIX1	ACE	0.633973	2.03212	4.40354	5.60147	1.85399	0.00853994	0.503139
TCF7L2	MAP3K7CL	-0.647982	3.11301	2.08236	2.65041	1.11359	0.040571	0.502983
BHLHE41	PITX2	-0.526776	3.15116	3.05551	0.746101	3.35244	0.0396369	0.50285
SIX1	IL21R	0.475891	2.03212	4.14189	1.25581	2.95844	0.0337812	0.502711
NFE2	TTC7A	0.600478	4.45978	1.83542	1.23178	2.76513	0.0300042	0.502316
DLX5	OLFM1	-0.249115	3.70822	5.1208	5.60147	1.96302	0.0096302	0.500917
NFATC2	AP4S1	-0.4172	3.38455	4.54798	5.60147	1.78139	0.00781392	0.500719
HOXB8	TPM1	0.787692	4.1156	2.39703	5.60147	1.68273	0.0068273	0.500066
DLX5	RANGRF	-0.324359	3.70822	4.76415	5.60147	1.84374	0.00843735	0.499326
DLX6	PLAG1	0.148539	4.33859	1.95713	5.60147	3.20452	0.0220452	0.499102
DLX3	LAMTOR3	0.579151	4.29274	4.35174	4.2102	1.65891	0.00660102	0.498801
FOXC1	OMD	0.814635	0.909762	4.95586	0.420031	5.54144	0.0583431	0.498774
ZIC4	BRSK1	0.420394	3.73784	4.95858	5.60147	1.67974	0.00679735	0.49833
MAFB	ELMO2	-0.453499	3.57308	4.64681	5.60147	1.69627	0.00696268	0.498135
AR	MRPS17	0.388011	1.92918	4.25021	5.60147	2.24455	0.0124455	0.49782
NR3C1	KRT16	0.261608	3.10809	2.82907	5.60147	2.52818	0.0152818	0.497818
AR	DKK2	-0.145814	1.92918	3.9044	0.637887	3.98494	0.17819	0.497479
TCF7	PAPPA	-0.33174	4.32491	1.39081	0.917209	2.25915	0.120253	0.497223
DLX1	CNN1	-0.246372	4.35323	2.5508	5.60147	2.36891	0.0136891	0.496941
HOXA2	RARRES1	0.439838	4.36219	4.80977	0.466219	3.80071	0.0303877	0.496907
RUNX3	GPD1L	0.336058	4.38548	4.51666	5.60147	1.75801	0.00758007	0.496872
RUNX3	NRN1	0.725631	4.38548	4.5155	1.00101	1.48616	0.0232389	0.496772
CEBPD	DIRC3	0.865277	2.72658	2.49857	0.45071	3.74585	0.0498977	0.496585
BACH2	GGA2	-0.192759	2.61301	4.24	5.60147	2.59786	0.0159786	0.496567
FOSB	C9orf116	0.667701	1.54099	5.12118	5.60147	1.88971	0.0088971	0.496248
MAF	AAR2	-0.444038	1.38103	4.68304	5.60147	2.32589	0.0132589	0.496077
HEY2	HIVEP3	0.270282	4.16271	2.31402	5.60147	2.41033	0.0141033	0.495745
CEBPB	MYH11	-0.419379	2.71424	4.85345	5.60147	1.8607	0.00860701	0.495607
ERF	ING1	0.793	3.63409	4.72674	5.60147	1.44844	0.0044844	0.495607
TCF7L2	ZFP69	-0.329734	3.11301	5.09983	5.60147	1.89201	0.00892006	0.49487
JUNB	CXorf56	0.599026	1.79628	4.74757	5.60147	1.90614	0.00906144	0.494249
RUNX3	PLAGL1	-0.600267	4.38548	2.3564	0.413431	4.73955	0.0406443	0.494027
NFE2	LURAP1L	-0.226561	4.45978	2.85432	5.60147	2.31861	0.0131861	0.493912
DLX5	FRMD4A	-0.493022	3.70822	1.26783	5.60147	2.51267	0.0151267	0.493484
FOSB	SART3	-0.396191	1.54099	4.12334	5.60147	2.43567	0.0143567	0.493091
TCF7L2	LRRC1	0.487158	3.11301	4.14432	1.94098	2.56432	0.0157405	0.492397
HOXC10	UAP1L1	0.607332	3.52125	4.39191	5.60147	1.58868	0.00588683	0.492038
DLX1	MRPL40	0.329612	4.35323	3.03984	5.60147	2.00425	0.0100425	0.491771
PRDM1	COG2	-0.50411	4.49923	4.16284	5.60147	1.58607	0.00586065	0.491612
MAF	TFAM	-0.687491	1.38103	4.04581	1.49448	2.62395	0.0326286	0.491493
RUNX3	HCRTR1	0.311587	4.38548	5.16618	5.60147	1.7217	0.00721697	0.491336
TEF	STYK1	0.480484	2.8919	5.11366	1.62347	2.48296	0.0171442	0.49105
MAFB	FAM114A2	0.231041	3.57308	4.61419	5.60147	2.0973	0.010973	0.491039
FOXD1	ZFP69	-0.449677	1.27663	5.09983	5.60147	2.30108	0.0130108	0.490973
NR3C1	NKTR	0.629856	3.10809	2.78083	5.60147	1.86315	0.0086315	0.490396
NFATC1	EXD2	0.314594	3.8531	4.52683	5.60147	1.85808	0.00858095	0.490067
EGR2	SORCS2	0.608199	3.58251	1.05458	1.04731	2.95197	0.0688998	0.48946
MAF	MYO5B	0.383611	1.38103	5.14763	5.60147	2.35765	0.0135765	0.488957
CEBPD	SPDL1	-0.519895	2.72658	4.50238	5.60147	1.77187	0.00771867	0.488937
TCF7	SNX32	-0.181053	4.32491	4.26126	5.60147	2.19289	0.0119289	0.488922
ATF4	PPIL6	0.487043	3.4823	4.89216	5.60147	1.64061	0.00640609	0.488467
TCF7	KCTD16	-0.136534	4.32491	2.18097	2.372	1.75748	0.0906934	0.486909
EGR1	KCNE4	-0.274701	3.002	1.08362	5.60147	3.65798	0.0265798	0.486679
EGR2	DLG3	0.557256	3.58251	4.67381	1.09525	1.97627	0.0240906	0.486541
RUNX2	AKAP17A	-0.401277	0.72437	4.45929	5.60147	3.13524	0.0213524	0.486061
HOXA6	LAMA3	-0.349655	3.43908	1.90392	5.60147	2.50976	0.0150976	0.485929
TEAD1	ZNF398	0.351861	4.96476	4.08191	5.60147	1.71091	0.00710914	0.485826
AR	ERAP2	0.345968	1.92918	2.51359	0.76219	4.84902	0.0781603	0.484626
PRDM1	AVPI1	0.862361	4.49923	1.46901	5.60147	1.8294	0.00829405	0.484431
RUNX3	COASY	0.397233	4.38548	4.42131	5.60147	1.67165	0.0067165	0.4844
BACH2	BOC	-0.169638	2.61301	2.51504	0.424716	9.41282	0.10835	0.482898
DLX5	ARPC5	-0.56918	3.70822	3.57561	2.89027	2.06512	0.0107022	0.482082
EGR2	SYDE2	0.472183	3.58251	4.07554	5.60147	1.72315	0.00723149	0.481211
TCF7	IQSEC2	0.738551	4.32491	4.56105	5.60147	1.41616	0.00416157	0.480942
MAFG	GLIS1	0.81363	0.408594	2.9764	0.846795	2.98125	0.192288	0.480329
DLX4	MEF2C	0.216314	4.51015	3.36399	5.60147	2.19191	0.0119191	0.480285
BACH2	RPUSD4	0.514744	2.61301	4.27972	0.209555	6.67264	0.059655	0.480164
DLX5	PAFAH2	0.223455	3.70822	4.85546	2.69212	2.66037	0.0166634	0.480161
FOS	WHAMM	-0.228932	2.01181	4.31622	5.60147	2.63579	0.0163579	0.480108
FOXD1	FAM71F1	0.606296	1.27663	4.77923	0.575183	2.42427	0.0929807	0.479609
NFATC2	HPRT1	-0.399128	3.38455	3.89877	5.60147	1.86936	0.00869355	0.479437
MAFB	IL16	0.535359	3.57308	4.42171	1.11545	1.52487	0.0332917	0.478955
AR	TTC32	0.856138	1.92918	4.81267	1.14315	1.1756	0.0448332	0.478921
MAFB	FOXC2	-0.113619	3.57308	2.54601	2.78919	4.60029	0.0360992	0.478758
AR	BIN1	0.850416	1.92918	3.34239	0.822482	1.7221	0.0615476	0.478033
HOXB8	ASPSCR1	0.740673	4.1156	4.28371	5.60147	1.45052	0.00450516	0.477985
JUNB	MOB2	-0.389403	1.79628	4.0811	5.60147	2.29962	0.0129962	0.477886
MAFB	CCNF	-0.588755	3.57308	5.10375	5.60147	1.52179	0.00521793	0.477554
JUNB	RPAP3	0.552217	1.79628	3.61894	5.60147	2.11895	0.0111895	0.47676
DLX2	FCHO2	0.572078	4.30221	1.78079	5.60147	1.98028	0.00980278	0.476581
AR	MVB12A	0.467004	1.92918	3.51766	5.60147	2.21301	0.01213	0.476534
EN1	ATG4C	-0.47729	3.97736	3.45339	5.60147	1.74401	0.00744013	0.476491
AR	RPS17	0.467849	1.92918	4.92398	5.60147	1.97103	0.00971025	0.476453
MAFB	RPS26	0.253368	3.57308	3.96449	5.60147	2.11851	0.0111851	0.476385
MAFB	ATP11C	-0.217151	3.57308	2.75182	5.60147	2.55731	0.0155731	0.476303
DLX2	STARD10	0.620893	4.30221	4.73552	5.60147	1.46031	0.00460313	0.476297
MAFB	STX1A	-0.395859	3.57308	4.27317	5.60147	1.78712	0.00787122	0.476247
TCF7	HOGA1	-0.314072	4.32491	5.11001	5.60147	1.71342	0.00713415	0.475264
CEBPA	COX14	-0.480522	4.22504	1.91028	5.60147	2.06101	0.0106101	0.475052
RUNX3	LRP12	-0.554092	4.38548	0.455593	5.60147	3.31058	0.0231058	0.474353
FOS	AP3M1	-0.639101	2.01181	4.12961	5.60147	1.85731	0.00857313	0.473579
TCF7	LPAR2	0.727342	4.32491	5.07159	5.60147	1.38312	0.00383118	0.473536
ZIC1	ICA1	0.385323	1.10959	5.13105	5.60147	2.52546	0.0152546	0.473408
MAF	C8orf34	-0.278123	1.38103	0.804916	5.60147	5.74567	0.0474567	0.472204
FOXD1	CSF1R	0.518741	1.27663	5.02032	0.689841	2.70553	0.076046	0.471873
TCF7L2	C15orf40	0.758373	3.11301	3.68354	5.60147	1.60357	0.00603572	0.471464
AR	VAV2	-0.263073	1.92918	3.76619	2.79445	1.76033	0.0501399	0.471437
PRDM1	JPH2	-0.324251	4.49923	4.55804	5.60147	1.73024	0.00730244	0.470624
TCF7	SCUBE1	0.158982	4.32491	4.80997	5.60147	2.1699	0.011699	0.470281
TCF7	NHS	0.302871	4.32491	1.85259	5.60147	2.4257	0.014257	0.470087
ATF7	CXorf56	0.655279	1.58256	4.74757	5.60147	1.89738	0.00897384	0.469563
AR	FOXC1	0.599385	1.92918	0.596117	3.72862	1.19931	0.15225	0.469294
AR	VPS4B	-0.450124	1.92918	1.0002	5.60147	3.64571	0.0264571	0.469268
MAFB	GFOD1	0.399937	3.57308	4.47667	2.1369	1.6133	0.0212661	0.469004
HOXC4	KRT34	-0.266479	3.76201	2.29419	0.465259	3.78274	0.115838	0.468883
EGR2	KCNE4	-0.246795	3.58251	1.08362	0.361296	11.5182	0.117536	0.468618
DLX3	EGR3	0.642986	4.29274	4.901	0.457587	2.26068	0.0334736	0.46842
ETV1	DOCK2	0.637876	4.29835	5.13627	4.16478	1.52245	0.00523579	0.467523
FOXD1	SIX1	0.914051	1.27663	2.60397	1.06963	1.97071	0.0729388	0.46718
HOXA10	NR6A1	0.788056	1.02637	2.95546	5.60147	2.43278	0.0143278	0.466737
TCF7L2	CLCN4	0.814064	3.11301	4.94733	0.446418	2.72065	0.0305747	0.465571
NR3C1	FYCO1	0.398277	3.10809	3.92076	5.60147	1.89925	0.00899248	0.464315
DLX5	SPDL1	-0.427755	3.70822	4.50238	0.684295	3.40134	0.0279305	0.464276
RUNX2	KIT	0.632702	0.72437	5.05942	5.60147	2.45532	0.0145532	0.46412
HOXB5	RIC8B	0.445095	3.41131	3.18218	5.60147	1.90145	0.00901453	0.463905
DLX3	ZDHHC6	-0.551571	4.29274	4.01108	0.880424	2.27649	0.0243666	0.463819
HOXA7	ENO4	0.407985	2.95638	4.79943	0.430835	4.18893	0.0443418	0.463258
MAF	ARHGEF25	-0.325264	1.38103	4.2803	5.60147	2.63224	0.0163224	0.462726
FOXD1	TPM1	0.785588	1.27663	2.39703	0.361728	7.39467	0.0719101	0.462407
HOXC9	OLFML1	-0.167667	2.901	3.42037	5.60147	2.78278	0.0178278	0.462323
PRDM1	SYNJ2	-0.316625	4.49923	5.23378	5.60147	1.66447	0.00664471	0.461906
GATA2	LRRC1	0.922609	4.45262	4.14432	0.637441	2.2338	0.0190477	0.461757
EGR3	LRRC20	0.828906	4.31292	4.47707	0.838501	2.2093	0.0155681	0.461599
FOSB	CD36	-0.214541	1.54099	3.60275	5.60147	3.17705	0.0217705	0.461468
NR3C1	MRS2	0.483485	3.10809	4.59088	5.60147	1.70163	0.00701631	0.461368
DLX3	FYN	0.333956	4.29274	3.64862	1.77944	2.49695	0.0198339	0.46095
DLX5	ATP6V1A	0.574367	3.70822	3.18298	5.60147	1.70953	0.0070953	0.460616
HOXC10	HOXC8	0.750279	3.52125	2.38843	0.435733	4.24828	0.0394332	0.460606
TCF7	ARFIP2	-0.505927	4.32491	4.40211	5.60147	1.55047	0.00550466	0.460491
RUNX3	ELOVL3	0.206353	4.38548	4.88924	1.73009	2.48662	0.0241825	0.460309
MEF2C	FAM110A	0.582074	2.80676	4.5442	5.60147	1.66464	0.00664641	0.460097
MAF	SLC15A2	-0.282696	1.38103	5.06149	5.60147	2.59796	0.0159796	0.459517
EGR2	RFWD3	0.145562	3.58251	4.27477	2.79057	3.25703	0.022676	0.459439
DLX3	ZNF138	0.222933	4.29274	4.16289	5.60147	2.01924	0.0101924	0.459272
BACH2	ZBTB3	-0.236377	2.61301	4.874	5.60147	2.22386	0.0122386	0.45896
EGR3	TMTC1	0.964977	4.31292	1.00184	5.60147	1.98825	0.00988255	0.458913
FOSB	BOC	-0.433444	1.54099	2.51504	0.417392	7.73984	0.0845541	0.458871
FOSB	BDH2	-0.433006	1.54099	3.96245	5.60147	2.32978	0.0132978	0.458831
TCF3	NRN1	0.327274	2.97137	4.5155	3.28232	2.10111	0.0151486	0.458751
FOXC1	ANAPC15	-0.458732	0.909762	4.46936	1.09604	5.24307	0.0427876	0.45863
DLX1	NLRP10	-0.161187	4.35323	3.14044	0.90909	3.0078	0.0760913	0.458483
MAF	TRIM27	-0.643257	1.38103	3.39916	5.60147	2.22054	0.0122054	0.458426
FOSB	ETHE1	-0.30076	1.54099	2.72319	5.60147	3.09483	0.0209483	0.45834
FOXD1	ACADSB	-0.281321	1.27663	4.16521	5.60147	2.89158	0.0189158	0.458316
SIX1	NUDT12	-0.545616	2.03212	4.64151	3.44918	1.06343	0.0242521	0.457793
HOXA6	KCTD19	0.769304	3.43908	5.1617	5.60147	1.42109	0.00421088	0.457751
TCF7	SOD3	-0.332392	4.32491	1.99002	0.940463	2.68232	0.063426	0.457725
EGR3	EFHB	0.494711	4.31292	5.14592	5.60147	1.49645	0.0049645	0.456904
TCF7	PSORS1C1	-0.566244	4.32491	4.55412	1.46486	1.323	0.0211347	0.456814
NFATC1	FAM117A	0.386563	3.8531	4.64075	1.20973	2.81474	0.0193948	0.45649
TEF	SYNPO	0.682855	2.8919	2.1509	0.80616	3.1108	0.0428184	0.456095
HOXC8	BNC1	0.86193	1.76895	4.47577	1.61193	1.38082	0.0300096	0.455827
FOXD1	ATG10	0.900731	1.27663	2.78905	2.07387	1.2996	0.0527148	0.455659
HOXB5	HIVEP3	0.821586	3.41131	2.31402	0.421026	4.09671	0.0407185	0.455488
ATF7	ARMC1	0.541879	1.58256	3.86123	5.60147	2.14454	0.0114454	0.455258
FOXD1	L3MBTL3	-0.371467	1.27663	4.0342	5.60147	2.62089	0.0162089	0.455245
MAFB	GRAMD1B	-0.450395	3.57308	1.70761	1.16833	1.9643	0.0721835	0.455235
SIX1	TRIT1	-0.647949	2.03212	3.74016	5.60147	1.87777	0.00877773	0.454683
RUNX3	SLC18A2	0.587444	4.38548	5.15998	0.294893	3.7984	0.0304989	0.454132
FOXD1	WHAMM	-0.280036	1.27663	4.31622	0.831814	5.85126	0.060427	0.453825
DLX5	BICD2	0.737014	3.70822	4.10532	1.93087	2.02507	0.0103281	0.453108
MEF2C	MYH11	-0.241192	2.80676	4.85345	5.60147	2.14587	0.0114587	0.45254
GATA2	RAB40A	0.427181	4.45262	5.03876	4.75343	1.6142	0.00614923	0.452205
EN1	TMEM167A	-0.764482	3.97736	3.51266	0.998299	2.60699	0.0162603	0.451987
HOXA2	ABCA6	-0.256646	4.36219	3.31579	5.60147	2.05676	0.0105676	0.45195
HOXA2	EN1	0.55022	4.36219	4.48242	0.505703	2.60958	0.0318276	0.451879
TCF7L2	AP3M1	-0.565661	3.11301	4.12961	1.11751	2.80528	0.0198128	0.451668
JUNB	BAIAP2L1	0.164651	1.79628	2.91938	5.60147	3.59583	0.0259583	0.451447
SIX1	ATP2A1	0.756306	2.03212	5.12114	5.60147	1.62766	0.00627655	0.450402
MAFB	DENND1A	-0.572278	3.57308	2.27551	0.366076	5.34477	0.0494455	0.450149
RUNX3	DDIT3	-0.229323	4.38548	3.02618	3.17893	2.50163	0.0185882	0.449883
RUNX3	BGN	-0.365969	4.38548	1.92955	5.60147	2.18615	0.0118615	0.44982
NFE2L2	RARRES1	0.424121	2.63744	4.80977	1.42196	2.31369	0.0254116	0.449801
HOXA2	OSBPL6	-0.345538	4.36219	3.06029	5.60147	1.91089	0.00910892	0.449747
HOXB5	ASPSCR1	0.668897	3.41131	4.28371	5.60147	1.5349	0.00534897	0.449523
HOXA11	HOXB5	0.564744	3.2013	3.81932	0.994601	2.00979	0.0325564	0.449365
NFATC2	GPR157	0.814316	3.38455	4.41622	4.56766	1.278	0.00632112	0.449123
HOXA6	PELO	-0.555181	3.43908	4.52641	4.74471	1.65878	0.00659534	0.448608
TEAD2	FGFR2	0.507011	3.77835	1.59024	2.27883	1.45297	0.0444687	0.448542
EGR3	RFX8	-0.223982	4.31292	1.84857	1.09307	2.4604	0.0933869	0.448496
CEBPA	BICD2	0.730805	4.22504	4.10532	5.60147	1.43893	0.00438933	0.448457
ATF1	OMD	0.479444	1.99475	4.95586	5.60147	1.89254	0.00892537	0.448454
HOXD3	LAMA1	0.279864	2.64755	4.51861	5.60147	2.12477	0.0112477	0.448202
HEY2	NR6A1	0.684012	4.16271	2.95546	5.60147	1.59516	0.00595164	0.447517
MAFB	MCCC1	-0.359817	3.57308	2.28651	0.606018	5.26134	0.0477302	0.447377
TCF7	IBA57	0.647993	4.32491	4.90426	5.60147	1.41133	0.00411331	0.446933
CREM	ZNF501	0.408785	3.39993	5.01914	5.60147	1.68032	0.00680324	0.446689
FOXD1	TXLNB	0.35741	1.27663	5.10041	0.762081	3.02707	0.0831936	0.446633
ZIC1	RUNX3	0.682781	1.10959	4.99938	0.767954	2.68535	0.0571782	0.446607
DLX5	SAP30	-0.405442	3.70822	4.19911	2.21699	2.34957	0.0135693	0.446233
MAFB	TNS1	-0.271547	3.57308	2.70208	1.50616	2.77922	0.0406422	0.446023
HOXC8	AKAP7	0.771399	1.76895	4.53142	1.06531	1.27523	0.0530874	0.445951
RUNX3	KCNE4	-0.28884	4.38548	1.08362	5.60147	2.95874	0.0195874	0.44559
HOXB5	MCRS1	0.628853	3.41131	4.59678	5.60147	1.52775	0.00527752	0.445357
FOXD1	C3	0.435556	1.27663	4.91572	5.60147	2.27667	0.0127667	0.445017
JUNB	PLXNA4	0.381873	1.79628	1.79421	5.60147	3.08864	0.0208864	0.444732
FOXD1	RAB11B	0.524441	1.27663	3.39364	5.60147	2.43485	0.0143485	0.44464
FOXD1	ATP2A1	0.649156	1.27663	5.12114	5.60147	1.95485	0.00954855	0.443746
MAFB	FAM184A	-0.243266	3.57308	4.83973	5.60147	1.95992	0.0095992	0.443325
ELK1	RARRES1	0.519675	4.0837	4.80977	1.27551	2.11879	0.0160478	0.442686
DLX5	ATL3	-0.305891	3.70822	3.38671	5.60147	2.01893	0.0101893	0.442669
NFATC1	TPCN2	0.37466	3.8531	4.79796	5.60147	1.67938	0.00679383	0.442661
DLX3	RGS4	-0.254114	4.29274	0.464125	0.465615	11.4321	0.164231	0.442595
HOXA11	PDIK1L	-0.178277	3.2013	5.02674	4.4643	2.42235	0.0142376	0.441706
AR	IL17RC	-0.440338	1.92918	3.65939	0.449682	4.81689	0.0655854	0.441618
AR	TMEM144	0.402197	1.92918	4.40687	1.263	2.524	0.040506	0.441523
RUNX3	DHRS7B	-0.203254	4.38548	1.43388	1.64894	4.49409	0.0465741	0.441123
MAF	DLX4	0.251271	1.38103	5.15717	1.62773	2.92781	0.0517155	0.441064
DLX3	DLD	-0.455104	4.29274	3.13392	2.1636	1.7766	0.0187142	0.440424
[truncated: 5,854 more rows]

## Sheet: Individual2_specific_network
TF	TG	corr	-log10P_TF	-log10P_TG	-log10P_Regulation	Fold	Activity	Score
NRL	LRRC4C	0.781453	4.66716	3.6248	5.71957	43.675	0.42675	1409.32
BACH2	HRCT1	0.860277	1.84639	4.73701	5.71957	48.7538	0.477538	1001.95
FOSB	PPARGC1A	0.814626	1.54464	4.96382	5.71957	28.4067	0.274067	278.125
BACH2	VSTM2L	0.872322	1.84639	4.75495	5.71957	24.6902	0.236902	256.215
FOXC2	LRRC4C	0.606458	1.97151	3.6248	5.71957	31.2208	0.302208	233.881
PKNOX2	SBSN	0.63717	3.80394	4.16488	5.71957	19.6093	0.186093	210.692
ZIC1	SBSPON	0.505548	2.66382	4.33228	5.71957	19.7293	0.187293	123.306
AR	ERMN	0.16704	3.1561	4.70375	5.71957	28.8092	0.278092	113.632
HOXB8	LRRC4C	0.69824	4.01038	3.6248	5.71957	14.462	0.13462	113.025
ZIC4	SBSPON	0.548819	4.34749	4.33228	5.71957	14.3171	0.133171	112.722
CEBPA	SBSN	0.843472	4.64148	4.16488	5.71957	11.4406	0.104406	111.396
HOXC4	LRRC4C	0.455928	4.26209	3.6248	5.71957	16.0444	0.150444	97.2442
FOSB	FHAD1	0.913725	1.54464	4.1551	5.71957	17.4239	0.164239	95.9866
HOXB5	LRRC4C	0.450646	3.33933	3.6248	5.71957	17.8727	0.168727	94.0838
MAFB	MTHFD2L	0.58001	3.25379	3.99292	5.71957	15.1725	0.141725	92.6793
BACH2	PDE10A	0.389027	1.84639	4.26796	5.71957	23.3224	0.223224	91.2851
HOXA6	LRRC4C	0.652636	3.43122	3.6248	5.71957	14.4992	0.134992	90.8694
BACH2	TSPAN2	-0.269499	1.84639	4.45487	5.71957	26.876	0.25876	88.1745
AR	GPER1	0.69242	3.1561	5.05579	5.71957	12.0015	0.110015	83.4368
MAF	COL5A3	0.691514	1.43172	1.48803	5.71957	30.6406	0.296406	76.5275
ZIC1	GSK3B	0.636508	2.66382	4.12937	5.71957	14.1479	0.131479	74.491
MAFF	LRRC4C	0.453499	3.50182	3.6248	5.71957	15.2369	0.142369	71.4217
BACH2	PRDM15	0.547581	1.84639	4.78856	5.71957	16.1248	0.151248	67.5342
BACH2	NFKBIZ	0.768753	1.84639	3.65567	5.71957	15.5076	0.145076	66.7699
TCF7L2	LRRC4C	0.659575	2.23722	3.6248	5.71957	14.597	0.13597	60.7195
FOXC2	IGF1	0.396749	1.97151	2.97808	5.71957	21.416	0.20416	58.2535
HOXB6	LRRC4C	0.675493	2.72773	3.6248	5.71957	12.6746	0.116746	56.5259
PRRX2	LRRC4C	0.577797	0.372399	3.6248	5.71957	35.2712	0.342712	53.9239
HOXD3	ABCA5	0.697533	3.51126	2.80556	5.71957	12.1193	0.111193	52.9619
FOXC2	NFKBIZ	0.613267	1.97151	3.65567	5.71957	14.7962	0.137962	51.6041
CEBPG	FAM151B	0.501779	3.13378	4.62831	5.71957	11.5359	0.105359	50.5931
AR	FMO3	0.323813	3.1561	4.12174	0.753717	30.5865	0.501367	48.6877
MAFK	LRRC4C	0.410611	2.45727	3.6248	5.71957	15.7021	0.147021	48.2916
NR4A2	NOS1AP	0.657081	3.53918	5.22321	5.71957	8.5378	0.075378	44.7109
SIX2	SCG2	0.3976	3.14432	5.04446	5.71957	11.6359	0.106359	44.6397
AR	FHAD1	0.58933	3.1561	4.1551	5.71957	10.2511	0.0925114	41.9202
AR	RPP30	-0.453882	3.1561	3.96266	5.71957	11.8201	0.108201	41.5235
MAFB	COL5A3	0.487964	3.25379	1.48803	5.71957	17.9931	0.169931	41.3174
ZIC4	ABCB5	0.899113	4.34749	5.33098	5.71957	6.40737	0.0540737	41.2942
SIX2	SLC15A3	0.753078	3.14432	4.57517	5.71957	8.58107	0.0758107	40.3096
ZIC1	HRCT1	0.876995	2.66382	4.73701	5.71957	8.31181	0.0731181	38.4672
CEBPA	LHFPL5	-0.220064	4.64148	4.96917	5.71957	11.8659	0.108659	37.4296
HOXA11	LRRC4C	0.381973	4.03405	3.6248	5.71957	10.9184	0.099184	34.5957
BACH2	ZNF273	0.646858	1.84639	3.21957	5.71957	13.0303	0.120303	34.4766
ZIC4	GSK3B	0.527081	4.34749	4.12937	5.71957	8.46954	0.0746954	34.2387
BACH2	PIGC	0.672906	1.84639	4.20714	5.71957	11.0524	0.100524	33.2166
NRL	VSTM2L	0.786648	4.66716	4.75495	5.71957	6.21368	0.0521368	32.3471
HOXB7	LRRC4C	0.719974	2.2733	3.6248	5.71957	10.2372	0.092372	32.0881
RFX1	AGO1	0.771199	4.29055	3.78365	5.71957	6.95915	0.0595915	29.6958
AR	TNNC2	0.730081	3.1561	5.20933	2.04585	8.20189	0.143578	28.9187
BACH2	RIMS3	0.724041	1.84639	4.89285	5.71957	9.26239	0.0826239	28.6314
NRL	OPHN1	0.545115	4.66716	3.09028	5.71957	8.34093	0.0734093	27.534
MAF	ARHGAP28	0.586615	1.43172	3.198	5.71957	13.8566	0.128566	27.3676
PKNOX2	HSPA12A	-0.408644	3.80394	4.06574	5.71957	9.00845	0.0800845	26.0784
BACH2	ZNF684	0.473571	1.84639	5.13667	5.71957	10.4752	0.0947518	25.4979
ALX4	ADAMTSL3	0.804018	4.72075	1.22978	5.71957	10.1774	0.0917743	24.936
MAFB	PDSS1	-0.610014	3.25379	5.08029	5.71957	7.0935	0.060935	24.9292
HOXD3	SLC24A3	0.517765	3.51126	2.93984	5.71957	9.47199	0.0847199	24.5307
MAFB	STX6	0.793146	3.25379	3.12287	5.71957	7.76748	0.0676748	24.2308
FOSB	LANCL2	0.763976	1.54464	3.82499	5.71957	10.1275	0.0912755	23.8649
FOSB	RPP21	0.852068	1.54464	4.77877	5.71957	8.65864	0.0765864	23.8551
TEAD2	LHFPL5	-0.306516	4.15977	4.96917	5.71957	8.60029	0.0760029	23.6872
TCF7L1	LHFPL5	-0.268555	2.50427	4.96917	5.71957	11.6242	0.106242	23.606
HOXD3	LHFPL5	-0.210603	3.51126	4.96917	5.71957	11.1074	0.101074	23.5954
AR	GRIA3	-0.121253	3.1561	1.11582	5.71957	31.4714	0.304714	23.4212
NRL	TMEM200B	0.827444	4.66716	5.15764	1.60667	7.05163	0.102187	23.0597
SIX2	ZCWPW1	0.484238	3.14432	4.9311	5.71957	7.83107	0.0683107	22.9722
MAFB	PRUNE2	-0.482078	3.25379	1.88328	5.71957	12.0786	0.110786	22.6093
MAFF	SBSN	0.304207	3.50182	4.16488	5.71957	9.88669	0.0888669	22.2955
MAFK	TNNC2	0.837497	2.45727	5.20933	3.69683	6.57727	0.0845241	22.033
FOXC2	LRRN4CL	-0.127109	1.97151	3.89462	5.71957	20.3655	0.193655	22.0153
AR	OLFML2A	0.138121	3.1561	5.08131	5.71957	13.6735	0.126735	21.9546
ATF5	FAM151B	0.304028	3.1891	4.62831	5.71957	9.76167	0.0876167	21.9522
MAFF	CPEB3	0.298467	3.50182	3.48375	5.71957	10.613	0.0961302	21.247
AR	LRRC4C	0.345547	3.1561	3.6248	5.71957	10.2051	0.0920513	21.24
FOSB	SYDE2	0.785655	1.54464	3.80477	5.71957	9.44624	0.0844624	21.0704
TCF7L1	RABL3	0.403044	2.50427	4.46352	5.71957	9.54382	0.0854382	21.0111
SIX1	IGF1	0.452567	2.092	2.97808	5.71957	11.693	0.10693	20.1637
FOSL1	SMIM3	-0.14796	1.31107	1.86076	5.71957	31.7273	0.307273	20.1271
ZIC1	ABCB5	0.893431	2.66382	5.33098	2.19335	8.98959	0.0802206	20.0682
IRF1	LRRC4C	0.691051	2.65145	3.6248	5.71957	7.7759	0.067759	20.0152
AR	ADO	-0.593494	3.1561	4.06062	5.71957	7.17361	0.0617361	19.2664
NRL	PDE10A	0.520894	4.66716	4.26796	1.10447	8.90692	0.18367	18.7475
MAF	MTHFD2L	0.323814	1.43172	3.99292	5.71957	13.6583	0.126583	18.3055
ZIC4	GTF2IRD2	0.614655	4.34749	3.84255	5.71957	6.0837	0.050837	18.1635
HOXA7	EPGN	-0.611889	2.78701	2.14423	5.71957	9.81732	0.0881732	18.104
HOXD8	ABCA5	0.807942	4.16452	2.80556	5.71957	6.216	0.05216	17.5056
TCF7L1	GPSM1	-0.588229	2.50427	4.64677	5.71957	7.16774	0.0616774	17.3081
FOXC2	CCDC97	0.448192	1.97151	4.76657	5.71957	8.87509	0.0787509	16.8368
SIX2	TRMT5	-0.482228	3.14432	5.03743	5.71957	6.69525	0.0569525	16.6583
SIX2	RTP4	0.678765	3.14432	5.26084	5.71957	5.59301	0.0459301	16.4971
RFX1	SUSD5	0.599488	4.29055	1.74906	5.71957	8.51103	0.0751103	16.4491
HOXD3	MTMR4	0.594032	3.51126	4.8421	5.71957	5.82472	0.0482472	16.2337
ALX4	LRRC4C	0.243049	4.72075	3.6248	5.71957	8.76788	0.0776788	16.2013
BACH2	EFHD2	0.345654	1.84639	3.93447	5.71957	11.1169	0.101169	16.1526
AR	SERPINE3	0.548372	3.1561	5.29533	5.71957	6.04208	0.0504208	15.9691
FOSB	SERPINE3	0.64019	1.54464	5.29533	5.71957	7.7664	0.067664	15.7387
AR	RBM23	0.75747	3.1561	4.63534	5.71957	5.50318	0.0450318	15.7071
TCF7L2	CCDC69	0.74202	2.23722	4.32753	5.71957	6.67433	0.0567433	15.5615
HOXD9	LRRC4C	0.433556	4.42625	3.6248	5.71957	6.74306	0.0574306	15.4074
HOXA7	SLC14A2	-0.400695	2.78701	4.89875	5.71957	7.47536	0.0647536	15.146
HOXD3	LANCL3	0.222921	3.51126	4.95087	1.2573	13.5446	0.228415	15.0739
ZIC4	HRCT1	0.710235	4.34749	4.73701	5.71957	4.73031	0.0373031	14.7619
TEF	LRRC4C	0.405722	3.81032	3.6248	5.71957	7.26933	0.0626933	14.6067
AR	PITPNM2	0.768615	3.1561	4.18526	5.71957	5.51653	0.0451653	14.4683
SIX2	BCL2L11	0.754711	3.14432	4.36836	5.71957	5.46467	0.0446467	14.4658
MAFB	ARHGAP28	0.389889	3.25379	3.198	5.71957	8.39621	0.0739621	14.41
HOXC10	LHFPL5	-0.307929	3.72429	4.96917	5.71957	7.16175	0.0616175	14.3835
MAF	PDSS1	-0.557893	1.43172	5.08029	5.71957	8.34389	0.0734389	14.2218
ZIC1	CSF2RA	0.889823	2.66382	5.26535	5.71957	4.98924	0.0398923	14.2077
MAF	CDKN1C	0.579214	1.43172	4.5788	5.71957	8.51504	0.0751504	13.8973
SIX2	RFX7	-0.538132	3.14432	4.22111	5.71957	6.34678	0.0534678	13.8628
BACH2	SLC30A7	-0.305275	1.84639	2.18967	5.71957	14.4856	0.134856	13.7899
SIX2	TBC1D30	0.440589	3.14432	5.3002	5.71957	6.23213	0.0523213	13.694
AR	ST3GAL6	-0.296422	3.1561	4.21269	5.71957	8.21042	0.0721042	13.3447
BACH2	HOXC4	0.438985	1.84639	4.85599	5.71957	8.19091	0.0719091	13.2596
AR	ADAMTS15	0.230677	3.1561	5.28219	5.71957	8.17619	0.0717619	12.9056
BACH2	SPAG1	0.568346	1.84639	4.76716	5.71957	7.23116	0.0623116	12.8925
AR	RCAN2	0.341198	3.1561	1.07462	5.71957	14.4438	0.134438	12.8523
RFX1	ADAMTSL3	0.535033	4.29055	1.22978	5.71957	9.40918	0.0840918	12.7758
MAF	PRUNE2	-0.42973	1.43172	1.88328	5.71957	14.3318	0.133318	12.6626
BACH2	CPT1C	0.366411	1.84639	4.29296	5.71957	9.22537	0.0822537	12.6053
FOS	PPARGC1A	0.548796	2.29216	4.96382	5.71957	6.45457	0.0545457	12.5737
SIX2	CSRNP2	-0.405666	3.14432	4.84798	5.71957	6.46606	0.0546606	12.5007
BACH2	PTRH1	0.534653	1.84639	4.95262	5.71957	7.1913	0.061913	12.4504
NFATC2	NFATC2	1	3.12279	3.50603	5.71957	4.95035	0.0395035	12.2459
BACH2	TMEM200B	0.556562	1.84639	5.15764	0.928519	9.18111	0.270283	12.2122
NRL	FMO3	0.36282	4.66716	4.12174	0.530392	17.8716	0.183147	12.1167
AR	LINC00346	0.417767	3.1561	4.81882	5.71957	6.26737	0.0526737	11.9969
NR4A2	LCA5	0.401874	3.53918	4.07376	5.71957	6.52545	0.0552545	11.9489
BACH2	ENTPD1	0.551374	1.84639	5.09758	5.71957	6.85514	0.0585514	11.9138
HOXC6	LANCL3	0.356156	2.69343	4.95087	1.70635	9.79739	0.149824	11.8956
CEBPG	TSLP	0.699175	3.13378	5.25217	5.71957	4.76859	0.0376859	11.8284
IRX2	SBSN	0.752389	4.63734	4.16488	5.71957	4.30359	0.0330359	11.8166
BACH2	TAF1B	0.374651	1.84639	3.41261	5.71957	9.85191	0.0885191	11.7749
RFX1	L3HYPDH	-0.490407	4.29055	3.1351	5.71957	6.08367	0.0508367	11.6688
IRF1	GPER1	0.802471	2.65145	5.05579	5.71957	4.87704	0.0387704	11.6338
RFX1	PITPNM2	0.838504	4.29055	4.18526	5.71957	4.20302	0.0320302	11.5938
MAFB	DENND2C	0.852928	3.25379	4.03243	5.71957	4.76818	0.0376818	11.5005
CEBPA	SLPI	0.808284	4.64148	4.71806	0.808115	8.63738	0.0930382	11.4948
FOSB	ADO	-0.581127	1.54464	4.06062	5.71957	7.93375	0.0693375	11.4683
ZIC1	ZSCAN9	0.913204	2.66382	5.01592	5.71957	4.58062	0.0358062	11.4464
FOSL1	IRAK2	0.464244	1.31107	5.01176	5.71957	8.61396	0.0761396	11.443
HOXC4	MAP1LC3B2	0.340892	4.26209	5.09425	0.934969	10.1594	0.162271	11.4084
ATF1	LRRC4C	0.325143	2.77537	3.6248	5.71957	8.31257	0.0731257	11.3723
HOXC10	ABCA5	0.555105	3.72429	2.80556	5.71957	6.35148	0.0535148	11.2759
HOXC10	KRT14	0.678139	3.72429	4.23377	5.71957	4.79819	0.0379819	11.1457
MAF	STX6	0.683537	1.43172	3.12287	5.71957	8.4975	0.074975	11.1364
AR	HTRA3	0.665509	3.1561	4.09055	5.71957	5.27113	0.0427113	11.0636
IRF1	EPGN	-0.281339	2.65145	2.14423	5.71957	11.5025	0.105025	11.0519
BACH2	RNF114	0.381535	1.84639	4.42132	5.71957	8.37841	0.0737841	11.0128
AR	ZRSR2	-0.518475	3.1561	3.14639	5.71957	6.59268	0.0559268	10.8577
IRF1	IGF1	0.591484	2.65145	2.97808	5.71957	6.8923	0.058923	10.8486
AR	DNAJC16	0.827373	3.1561	3.35944	5.71957	5.15235	0.0415235	10.7345
FOSB	KRT34	-0.266512	1.54464	2.76667	5.71957	13.3057	0.123057	10.6662
ZIC1	CCDC24	0.410682	2.66382	5.20505	5.71957	6.23406	0.0523406	10.627
AR	SUSD5	0.500624	3.1561	1.74906	5.71957	8.68688	0.0768688	10.5546
ALX4	FMO3	0.202157	4.72075	4.12174	5.71957	7.33814	0.0633814	10.4638
AR	C6orf132	0.590595	3.1561	3.24284	1.26583	9.25727	0.146522	10.3784
MAFK	ERMN	0.319297	2.45727	4.70375	5.71957	7.52052	0.0652052	10.3511
FOXC2	LINC00346	0.555989	1.97151	4.81882	5.71957	6.34033	0.0534033	10.2294
NRL	ASAP2	-0.516292	4.66716	1.96285	5.71957	6.65691	0.0565691	10.1871
FOXC2	FBXL13	-0.143071	1.97151	4.21944	5.71957	12.6849	0.116849	10.0896
JDP2	PPARGC1A	0.827235	0.838953	4.96382	5.71957	7.66167	0.0666168	10.0567
SIX2	TNRC6A	0.515358	3.14432	2.83827	5.71957	6.69577	0.0569577	10.0324
AR	EGFLAM	0.526129	3.1561	5.01194	1.59849	2.64793	0.284144	10.0093
HOXA2	GLIS1	-0.359933	4.5324	3.24356	5.71957	6.2672	0.052672	9.99057
HOXA7	ABCA5	0.48482	2.78701	2.80556	5.71957	7.25652	0.0625652	9.84383
BACH2	HAPLN1	-0.19079	1.84639	1.42743	5.71957	18.7932	0.177932	9.61729
AR	KLHL24	0.542496	3.1561	1.16063	5.71957	9.68958	0.0868958	9.56993
SIX2	ERMN	0.337781	3.14432	4.70375	5.71957	6.29941	0.0529941	9.53885
AR	VDR	-0.320392	3.1561	3.74604	5.71957	7.13202	0.0613202	9.47511
TEF	PIGZ	0.68987	3.81032	3.74378	5.71957	4.62686	0.0362686	9.44537
TCF7L1	TUFT1	-0.244747	2.50427	2.78545	5.71957	10.3118	0.0931175	9.37609
ZIC4	SYNDIG1	0.961025	4.34749	2.15429	0.616467	5.96398	0.283297	9.37486
TCF7L2	FHAD1	0.623871	2.23722	4.1551	5.71957	5.83929	0.0483929	9.37325
AR	PPARGC1A	0.758629	3.1561	4.96382	5.71957	4.20852	0.0320852	9.17896
ZIC4	CSF2RA	0.829754	4.34749	5.26535	5.71957	3.44513	0.0244513	9.15132
AR	UNC5C	0.72569	3.1561	2.13315	1.00421	4.5507	0.408672	9.12434
TCF7L1	NUDT13	0.163049	2.50427	5.16339	5.71957	9.20428	0.0820428	9.10603
HOXC10	LANCL3	0.54123	3.72429	4.95087	5.71957	4.5206	0.035206	9.08413
BACH2	TAMM41	0.611778	1.84639	4.29525	5.71957	6.24242	0.0524242	9.08145
HOXD8	SLC24A3	0.627029	4.16452	2.93984	5.71957	5.05423	0.0405423	8.99711
HOXC10	SLC24A3	0.336675	3.72429	2.93984	5.71957	7.04406	0.0604406	8.97621
FOSB	GDF5	-0.166126	1.54464	5.12484	5.71957	11.4282	0.104282	8.96383
TCF7L1	EGFR	0.469257	2.50427	3.17834	5.71957	6.96456	0.0596456	8.8742
HOXA11	SLC1A2	0.842803	4.03405	4.99002	5.71957	3.55854	0.0255854	8.8348
TEAD4	LRRN4CL	-0.483755	4.0781	3.89462	5.71957	5.01063	0.0401063	8.83113
RXRB	ABCA5	0.515167	4.1993	2.80556	5.71957	5.52126	0.0452126	8.66575
FOXC2	ZNF212	0.61763	1.97151	4.6963	5.71957	5.65725	0.0465725	8.61749
DBP	ERMN	0.227615	3.91504	4.70375	5.71957	6.47386	0.0547386	8.49575
IRF1	PDE4A	0.836422	2.65145	4.43689	2.35436	2.65167	0.137419	8.44165
CEBPD	SBSN	0.621296	2.88805	4.16488	5.71957	4.96876	0.0396876	8.42893
NRL	YIPF6	0.520806	4.66716	4.09858	5.71957	4.37197	0.0337197	8.40012
ZIC1	GLIS1	-0.124286	2.66382	3.24356	5.71957	12.1024	0.111024	8.25283
MAFB	APBB1IP	0.582487	3.25379	0.338822	0.45903	36.5396	0.765483	8.24492
BACH2	PRICKLE2	0.170749	1.84639	3.72916	5.71957	11.5438	0.105438	8.18467
MAF	TRIM22	0.522586	1.43172	0.68569	5.71957	17.1967	0.161967	8.17296
TCF7L1	CCDC34	0.332736	2.50427	4.34614	5.71957	6.79897	0.0579897	8.16664
HOXC11	LHFPL5	-0.309292	4.46642	4.96917	5.71957	5.05666	0.0405666	8.05394
MAFB	CDKN1C	0.399616	3.25379	4.5788	5.71957	5.3783	0.043783	8.01857
ZIC1	LRRC4C	0.622572	2.66382	3.6248	5.71957	5.33713	0.0433713	7.9589
ZIC4	CCDC24	0.402997	4.34749	5.20505	5.71957	4.43052	0.0343052	7.92763
HOXD3	HAPLN3	-0.362468	3.51126	1.96721	1.24599	13.4794	0.188416	7.92295
AR	CCDC34	0.323821	3.1561	4.34614	5.71957	6.10011	0.0510011	7.90389
SIX2	POMT1	-0.464592	3.14432	4.69257	5.71957	5.01229	0.0401229	7.88501
TEAD4	LRRC4C	0.424078	4.0781	3.6248	5.71957	5.20204	0.0420204	7.83765
CEBPD	LHFPL5	-0.231713	2.88805	4.96917	5.71957	6.92489	0.0592489	7.80362
FOSB	HOXB5	0.435517	1.54464	3.66539	5.71957	7.92205	0.0692206	7.73373
HOXB5	EMX2	-0.61056	3.33933	3.4835	0.964349	3.43317	0.328744	7.73019
ZIC1	FMO3	0.100787	2.66382	4.12174	0.396738	39.0577	0.450513	7.72521
MYC	LHFPL5	-0.266065	2.82788	4.96917	5.71957	6.5285	0.055285	7.7182
FOSB	ATOH8	0.935855	1.54464	1.7894	5.71957	7.70422	0.0670422	7.64159
HOXA11	ADPRH	0.422549	4.03405	5.15611	5.71957	4.42682	0.0342682	7.62585
HOXC4	LHFPL5	-0.17638	4.26209	4.96917	5.71957	6.4837	0.054837	7.59656
MAFB	GNG11	-0.709146	3.25379	3.51232	0.934931	7.83845	0.127483	7.5715
ALX4	SLC1A2	0.854392	4.72075	4.99002	5.71957	3.1111	0.021111	7.56064
AR	NTRK2	0.552514	3.1561	1.04806	2.82737	1.572	0.922265	7.49154
FOS	FHAD1	0.755664	2.29216	4.1551	5.71957	4.79114	0.0379114	7.47702
ZIC4	ZNF624	0.306441	4.34749	5.18886	2.46356	7.12378	0.0614508	7.45517
FOXL1	CCDC34	0.577082	4.70318	4.34614	5.71957	3.84708	0.0284708	7.3897
RUNX1	SCG2	0.520483	2.93158	5.04446	5.71957	4.61949	0.0361949	7.36085
FOXC2	C14orf39	0.459322	1.97151	5.20684	5.71957	5.73739	0.0473739	7.33005
HOXA11	EPGN	-0.278561	4.03405	2.14423	5.71957	7.8093	0.068093	7.32841
SIX2	CCDC69	0.305915	3.14432	4.32753	5.71957	6.06937	0.0506937	7.32537
CEBPB	SBSN	0.67505	3.0906	4.16488	5.71957	4.36961	0.033696	7.31754
SIX2	SOX30	0.34247	3.14432	5.11736	5.71957	5.34369	0.0434369	7.31574
SIX1	RFX7	-0.835291	2.092	4.22111	5.71957	4.68958	0.0368958	7.29964
ALX4	EPGN	-0.371802	4.72075	2.14423	5.71957	6.33649	0.0533649	7.27881
GSC	IL3RA	0.895657	4.46241	4.96197	5.71957	3.08065	0.0208065	7.27058
FOSB	PITPNM2	0.68463	1.54464	4.18526	5.71957	5.87717	0.0487717	7.25614
FOXC2	PWWP2B	0.456659	1.97151	4.95633	5.71957	5.84687	0.0484687	7.23266
FOSL1	ANKS6	0.692201	1.31107	4.07214	5.71957	6.36586	0.0536586	7.22007
ZIC4	MAP1LC3B2	0.961025	4.34749	5.09425	5.71957	2.97585	0.0197585	7.1578
RXRB	PDSS1	-0.462529	4.1993	5.08029	5.71957	4.08937	0.0308937	7.13006
SIX1	PIGC	0.803603	2.092	4.20714	5.71957	4.71861	0.037186	7.09819
FOXL1	LRRN4CL	-0.243813	4.70318	3.89462	5.71957	5.78709	0.0478708	7.07633
SIX2	ZNF667	-0.430564	3.14432	4.29065	5.71957	5.14119	0.0414119	7.0736
AR	PIGC	0.254105	3.1561	4.20714	5.71957	6.53176	0.0553176	6.9728
MAFB	SMPDL3A	0.909813	3.25379	4.68299	5.71957	3.49506	0.0249506	6.91454
PKNOX2	ERMN	0.557938	3.80394	4.70375	5.71957	4.01346	0.0301346	6.90577
HOXA11	ADAMTSL3	0.75657	4.03405	1.22978	5.71957	6.18957	0.0518957	6.89559
TCF7L1	IRAK2	0.154122	2.50427	5.01176	5.71957	8.35327	0.0735327	6.79575
HOXD9	VSTM4	0.563373	4.42625	3.75786	5.71957	4.08408	0.0308408	6.75081
CEBPG	SLC25A33	0.82766	3.13378	4.92378	5.71957	3.57958	0.0257958	6.74471
ALX4	SCG2	0.758961	4.72075	5.04446	5.71957	3.09522	0.0209522	6.70395
ZIC1	LDB3	0.414532	2.66382	3.8427	1.00545	6.8107	0.230313	6.69221
CEBPA	NFATC2	0.654453	4.64148	3.50603	0.909754	7.31239	0.0941246	6.66862
SIX2	LPIN3	-0.457729	3.14432	4.51386	2.86667	4.38009	0.0816585	6.66109
MYC	SBSN	0.328783	2.82788	4.16488	5.71957	5.99845	0.0499845	6.64063
NRL	RBM23	0.756732	4.66716	4.63534	5.71957	3.2009	0.022009	6.59647
BACH2	AGAP3	0.780244	1.84639	4.07762	5.71957	4.95254	0.0395254	6.57703
HOXA11	CEACAM19	-0.507341	4.03405	2.65075	5.71957	5.08562	0.0408562	6.44726
BACH2	DLST	0.504715	1.84639	3.09174	5.71957	6.7545	0.057545	6.40527
ZIC1	PLEKHO2	0.793341	2.66382	4.76954	5.71957	3.86155	0.0286155	6.37043
TEAD2	LANCL3	0.729963	4.15977	4.95087	1.06444	5.74651	0.0692241	6.36552
FOXC2	TXNDC16	0.415871	1.97151	4.93187	0.859492	6.70747	0.270428	6.30405
DBP	LHFPL5	-0.122464	3.91504	4.96917	5.71957	7.31077	0.0631077	6.28694
TCF7L1	NUP133	0.567271	2.50427	3.45727	5.71957	5.25074	0.0425074	6.2698
AR	HOXB5	0.609893	3.1561	3.66539	0.82803	5.76501	0.185619	6.25165
ZIC1	OPA3	0.65828	2.66382	3.96438	5.71957	4.49524	0.0349524	6.24719
BACH2	GIGYF2	0.661119	1.84639	3.25144	5.71957	5.76398	0.0476398	6.23355
SIX2	ZNF710	-0.536073	3.14432	4.79688	5.71957	4.20381	0.0320381	6.22848
ZIC4	ZSCAN9	0.80913	4.34749	5.01592	5.71957	3.03043	0.0203043	6.20957
HOXB6	MAP1LC3B2	0.540558	2.72773	5.09425	0.624557	10.6753	0.12284	6.15202
PKNOX2	CLDN23	0.61442	3.80394	5.29961	5.71957	3.47588	0.0247588	6.09677
CEBPG	CCDC85C	0.676728	3.13378	4.63346	5.71957	3.83	0.0283	6.09168
BACH2	MLXIPL	0.633085	1.84639	5.30956	5.71957	4.65503	0.0365503	6.03979
NR1D1	COL24A1	0.335095	3.5567	3.8599	5.71957	5.26797	0.0426797	5.91589
ZIC4	OLFML1	0.221114	4.34749	3.9713	5.71957	5.72581	0.0472581	5.90831
ZIC1	VASH1	0.844843	2.66382	5.14286	0.447355	8.84702	0.12848	5.88531
NRL	TMEM200A	-0.393595	4.66716	0.449654	5.71957	11.6517	0.106517	5.86342
TCF7L1	GRIA3	-0.128493	2.50427	1.11582	5.71957	17.4019	0.164019	5.86154
SIX2	PIGZ	0.142584	3.14432	3.74378	5.71957	8.31434	0.0731434	5.83812
NRL	HEPH	-0.332628	4.66716	2.63503	5.71957	5.50186	0.0450186	5.79511
MAFB	ECM2	0.210814	3.25379	1.32251	5.71957	11.075	0.10075	5.78952
FOXJ2	LRRC4C	0.617409	4.2708	3.6248	5.71957	3.79219	0.0279219	5.78847
MAFK	RFK	0.642883	2.45727	4.73568	5.71957	4.20633	0.0320633	5.77088
FOXF2	EMX2	-0.670379	4.48359	3.4835	5.71957	3.62863	0.0262863	5.7121
HOXA3	GLIS1	-0.470479	1.61208	3.24356	1.8007	7.31833	0.175876	5.70182
AR	HECW1	0.592192	3.1561	3.10176	0.657736	8.97967	0.166167	5.68957
MAFB	CYP2R1	0.716438	3.25379	3.50401	0.56388	6.8939	0.178964	5.68265
FOSB	OSCP1	0.492033	1.54464	5.08661	5.71957	5.59259	0.0459259	5.67915
ERG	IRAK2	0.578607	4.38615	5.01176	5.71957	3.3284	0.023284	5.63786
CEBPD	TSLP	0.73262	2.88805	5.25217	5.71957	3.50762	0.0250762	5.59062
AR	TMEM200B	0.388524	3.1561	5.15764	2.38654	2.20413	0.168022	5.58976
NRL	RFK	0.470879	4.66716	4.73568	5.71957	3.60341	0.0260341	5.58425
AR	KCTD21	-0.377945	3.1561	5.09216	5.71957	4.52491	0.0352491	5.54118
CEBPG	INHBB	-0.501337	3.13378	0.213641	5.71957	17.4668	0.164668	5.52165
TCF7L2	PITPNM2	0.897567	2.23722	4.18526	5.71957	3.91669	0.0291669	5.49126
NRL	ENTPD1	0.747475	4.66716	5.09758	1.23491	4.65393	0.0535918	5.4773
AR	AKNA	0.326385	3.1561	3.02507	0.78356	8.96857	0.250065	5.476
TCF7L1	LRRC2	0.47915	2.50427	2.65258	0.451237	15.3636	0.24765	5.46459
IRF1	KCNMB2	0.79573	2.65145	4.20247	0.465609	6.26978	0.210918	5.45935
SIX1	PIGZ	0.39962	2.092	3.74378	5.71957	6.04228	0.0504228	5.45396
JUND	HRCT1	0.555543	2.82398	4.73701	5.71957	4.11431	0.0311431	5.44635
CEBPA	PHLDB3	0.818843	4.64148	5.19832	5.71957	2.74513	0.0174513	5.41343
ZIC1	ELF4	0.651227	2.66382	4.89776	5.71957	3.87351	0.0287351	5.40897
NRL	EFHD1	0.721002	4.66716	2.32512	1.03893	3.18083	0.209045	5.4051
CEBPA	CYP2R1	0.670778	4.64148	3.50401	0.515801	8.89856	0.107919	5.4038
BACH2	SYNPO	-0.164628	1.84639	2.55037	5.71957	11.5189	0.105189	5.37248
HOXB8	ADRA2C	0.918871	4.01038	4.63848	5.71957	2.89138	0.0189138	5.34645
JDP2	BARX1	0.471659	0.838953	5.30194	0.814585	16.8031	0.185993	5.341
HOXA4	LRRC4C	0.316355	4.40759	3.6248	5.71957	4.82083	0.0382082	5.32479
AR	HOXA13	0.800646	3.1561	5.32183	5.71957	3.17223	0.0217223	5.30015
MAFB	EGF	0.70192	3.25379	4.62411	0.755797	5.35858	0.123863	5.29788
MAFB	NOC3L	-0.508014	3.25379	4.45726	5.71957	4.0695	0.030695	5.26388
FOSB	KIF27	-0.392967	1.54464	3.21225	5.71957	7.38398	0.0638398	5.25699
MAFB	FOXD1	-0.456881	3.25379	3.76018	0.46178	9.28289	0.218503	5.23572
CEBPA	GAS1	0.329299	4.64148	3.57889	2.01544	7.37355	0.0640367	5.20557
BACH2	GRIA3	-0.102832	1.84639	1.11582	5.71957	21.2188	0.202188	5.1986
TCF7L1	TRERF1	0.589925	2.50427	1.47437	5.71957	6.96763	0.0596763	5.18008
IRF1	TRMT5	-0.54337	2.65145	5.03743	5.71957	4.06011	0.0306011	5.15736
ALX4	LRRC7	0.936467	4.72075	5.27655	5.71957	2.52638	0.0152637	5.14489
SIX2	LANCL2	0.419129	3.14432	3.82499	5.71957	4.75294	0.0375294	5.14283
HOXD8	MTMR4	0.663108	4.16452	4.8421	5.71957	3.14071	0.0214071	5.14201
ZIC1	ABL2	0.478853	2.66382	4.21282	5.71957	4.61591	0.0361591	5.13
FOXF2	AGO1	0.616887	4.48359	3.78365	5.71957	3.45551	0.0245551	5.07878
ZIC1	TMEM59L	0.969663	2.66382	4.67508	3.51393	3.99182	0.029974	5.07719
HOXD9	IFIT1	-0.431212	4.42625	5.07867	5.71957	3.56568	0.0256568	5.07207
NRL	HHIPL1	0.524244	4.66716	3.6085	0.564652	9.02462	0.112238	5.04967
FOXL1	PHTF1	0.597187	4.70318	2.7192	5.71957	3.92786	0.0292786	5.02359
ZIC4	SCAMP5	0.656564	4.34749	4.28008	2.62214	4.47526	0.0348722	4.99942
FOXD2	HTRA3	0.962902	4.67979	4.09055	5.71957	2.73331	0.0173331	4.99479
SIX2	ZNF449	-0.393081	3.14432	4.89096	5.71957	4.33076	0.0333076	4.98741
FOXC1	HTRA3	0.924214	0.921288	4.09055	5.71957	5.51973	0.0451973	4.96985
TCF7L1	MECR	0.501724	2.50427	4.62512	5.71957	4.39828	0.0339828	4.96794
FOXL1	LRGUK	0.519743	4.70318	4.60981	5.71957	3.31688	0.0231688	4.9529
JUN	VSTM2L	0.961791	2.82703	4.75495	5.71957	3.13277	0.0213277	4.94076
MAFB	CPEB3	0.717424	3.25379	3.48375	0.0691434	29.6659	0.295812	4.9344
AR	C14orf39	0.576937	3.1561	5.20684	5.71957	3.55384	0.0255384	4.92164
ZIC1	CACNA1A	0.940505	2.66382	1.67103	0.681434	6.41093	0.266465	4.87345
TEF	EPGN	-0.360082	3.81032	2.14423	5.71957	5.8832	0.048832	4.8341
HOXC6	LHFPL5	-0.19444	2.69343	4.96917	5.71957	6.22065	0.0522065	4.83392
NRL	EMX2	-0.581356	4.66716	3.4835	1.00233	3.22798	0.155891	4.7673
PRRX1	LANCL3	0.281271	1.28418	4.95087	3.11386	9.75119	0.087695	4.76172
CEBPA	OVOL2	0.590617	4.64148	5.28037	5.71957	2.94033	0.0194033	4.72347
BACH2	CLEC3B	0.239512	1.84639	4.10074	5.71957	7.26285	0.0626285	4.71798
CREM	KRT14	0.724096	3.89421	4.23377	5.71957	3.16875	0.0216875	4.6925
SIX2	TOMM22	0.574583	3.14432	3.86647	5.71957	3.96255	0.0296255	4.69028
FOSB	KIAA1522	0.505818	1.54464	5.0488	5.71957	5.08407	0.0408407	4.68465
HOXC4	GRIA3	-0.197632	4.26209	1.11582	5.71957	9.84629	0.0884629	4.68244
NRL	OCEL1	0.506964	4.66716	5.17942	5.71957	3.13078	0.0213078	4.67593
SIX1	SLC15A3	0.669209	2.092	4.57517	5.71957	4.09567	0.0309567	4.64486
ZIC4	CACNA1A	0.779094	4.34749	1.67103	0.915102	6.38993	0.140315	4.6439
NRL	RPP30	-0.616337	4.66716	3.96266	5.71957	3.21519	0.0221519	4.64342
IRF1	SIX1	0.617822	2.65145	2.54692	1.04788	5.66041	0.187605	4.64263
ZIC1	ARHGEF37	-0.296863	2.66382	5.18062	5.71957	4.96027	0.0396027	4.60296
FOXL1	HTRA3	0.685562	4.70318	4.09055	5.71957	3.01984	0.0201984	4.60134
DBP	FAM151B	0.256528	3.91504	4.62831	5.71957	4.6901	0.036901	4.60126
MAFB	HAPLN1	-0.265006	3.25379	1.42743	0.374464	29.9943	0.33119	4.57853
MAFK	ZNF483	0.59108	2.45727	3.51356	5.71957	4.48519	0.0348519	4.56266
MAFB	CACHD1	0.376176	3.25379	3.65459	0.640586	9.36524	0.168881	4.53206
MAFF	ERMN	0.178864	3.50182	4.70375	5.71957	5.70256	0.0470256	4.51885
BACH2	DDX19B	0.537479	1.84639	4.62247	5.71957	4.67997	0.0367997	4.51868
AR	NXNL2	0.644058	3.1561	4.44404	0.468801	3.86223	0.275731	4.50988
ZIC4	VEZF1	0.218544	4.34749	2.45249	5.71957	6.3276	0.053276	4.49281
BACH2	HOXB5	0.169494	1.84639	3.66539	5.71957	8.78979	0.0778979	4.49228
PPARG	GSTM1	0.725769	3.89383	5.277	5.71957	2.84536	0.0184536	4.47863
HOXD8	LHFPL5	-0.206191	4.16452	4.96917	5.71957	4.80606	0.0380606	4.46424
MAFB	BFSP1	0.229727	3.25379	4.04647	5.71957	5.59559	0.0459559	4.44867
HOXC4	MTMR4	0.47653	4.26209	4.8421	5.71957	3.35527	0.0235527	4.44505
CEBPG	CACHD1	0.543592	3.13378	3.65459	5.71957	4.06466	0.0306466	4.43556
RFX1	LPAR6	-0.618679	4.29055	3.09573	5.71957	3.60963	0.0260963	4.42737
AR	LYVE1	0.258148	3.1561	5.18321	5.71957	4.80661	0.0380661	4.41936
HOXA7	GRIA3	-0.173465	2.78701	1.11582	5.71957	12.4764	0.114764	4.41781
NFE2L2	PPARGC1A	0.571867	2.74024	4.96382	5.71957	3.68851	0.0268851	4.41191
MAFB	RNF217	0.706731	3.25379	1.9201	5.71957	4.68308	0.0368308	4.35586
AR	L3HYPDH	-0.358581	3.1561	3.1351	5.71957	5.15972	0.0415972	4.35556
RXRB	LHFPL5	-0.129456	4.1993	4.96917	5.71957	5.82984	0.0482984	4.35046
ZIC4	LDB3	0.342678	4.34749	3.8427	0.909114	6.06099	0.137873	4.34912
ZIC1	IQSEC1	0.88225	2.66382	3.87311	5.71957	3.42858	0.0242858	4.33497
HOXD3	BFSP1	0.58784	3.51126	4.04647	5.71957	3.54849	0.0254849	4.32006
PPARG	PTK2B	0.864712	3.89383	2.48073	5.71957	3.5483	0.025483	4.31978
FOSB	C6orf132	0.784866	1.54464	3.24284	0.456383	11.467	0.209865	4.31785
ATF1	PPARGC1A	0.639392	2.77537	4.96382	5.71957	3.46138	0.0246138	4.29235
BACH2	SLC6A17	0.603378	1.84639	5.29419	5.71957	4.09447	0.0309447	4.27426
NRL	PTRH1	0.548395	4.66716	4.95262	5.71957	2.97754	0.0197754	4.269
TCF7L1	FHAD1	0.206857	2.50427	4.1551	5.71957	6.39123	0.0539123	4.242
AR	ITM2C	0.681135	3.1561	4.06552	5.71957	3.45562	0.0245562	4.2418
MAF	BFSP1	0.272077	1.43172	4.04647	5.71957	7.37747	0.0637747	4.24177
MAF	CACHD1	0.352193	1.43172	3.65459	1.14332	9.46988	0.212251	4.23487
DBP	ABCA5	0.482542	3.91504	2.80556	5.71957	4.27068	0.0327068	4.23437
RFX1	DNAJC7	0.809012	4.29055	2.76038	5.71957	3.3229	0.023229	4.23009
ETV2	LDLRAD2	0.391701	4.71737	5.17922	5.71957	3.3212	0.023212	4.21979
FOXC1	LRRN4CL	-0.294396	0.921288	3.89462	5.71957	8.85535	0.0785535	4.20268
TCF7L1	IAH1	0.477557	2.50427	3.33714	5.71957	4.81562	0.0381562	4.19433
NRL	NOS1AP	0.19608	4.66716	5.22321	5.71957	4.43083	0.0343083	4.15595
MAF	EGF	0.761557	1.43172	4.62411	0.95645	4.90015	0.175517	4.14744
FOSB	VSTM4	0.831222	1.54464	3.75786	0.941717	2.56515	0.355664	4.14531
HOXD3	ARHGAP28	0.440037	3.51126	3.198	5.71957	4.3592	0.033592	4.13844
ZIC1	PPP2R3C	0.639413	2.66382	2.23221	5.71957	4.88963	0.0388963	4.13589
AR	TEX2	-0.642217	3.1561	4.18349	1.36951	3.2171	0.11047	4.12709
AR	ZNF606	-0.611381	3.1561	5.0615	5.71957	3.26214	0.0226214	4.12219
AR	EFHD2	0.325259	3.1561	3.93447	5.71957	4.74508	0.0374508	4.1052
HOXC10	PDHB	0.636817	3.72429	3.65755	5.71957	3.41898	0.0241898	4.10337
IRF1	ZNF414	0.764038	2.65145	4.88509	5.71957	3.22837	0.0222837	4.07197
NRL	CYP27C1	-0.4668	4.66716	4.14957	2.48513	2.81885	0.0641631	4.06343
RFX2	SUSD5	0.542128	1.69054	1.74906	5.71957	7.17303	0.0617303	4.05972
FOSL1	HAUS6	0.387041	1.31107	4.26483	5.71957	6.24834	0.0524834	4.05914
BACH2	AP3B2	0.354949	1.84639	5.32314	5.71957	5.03793	0.0403793	4.05912
TCF7L2	RPP30	-0.600566	2.23722	3.96266	5.71957	4.18269	0.0318269	4.05387
NRL	ZNF212	0.833427	4.66716	4.6963	5.71957	2.52838	0.0152838	4.0375
RXRB	CDKN1C	0.354276	4.1993	4.5788	5.71957	3.75479	0.0275479	4.03003
NRL	CYP4X1	0.789141	4.66716	5.09332	0.503924	6.77352	0.0628898	4.02686
MAFK	GEM	0.840557	2.45727	1.77841	5.71957	4.90523	0.0390523	4.02461
RFX1	ALOX12	0.444467	4.29055	5.31995	5.71957	3.17795	0.0217795	4.01622
HOXA11	TMEM200A	-0.298813	4.03405	0.449654	5.71957	11.8538	0.108538	3.98858
JUND	VSTM2L	0.780203	2.82398	4.75495	5.71957	3.12678	0.0212678	3.98474
SIX2	RILPL2	0.549012	3.14432	2.76038	5.71957	4.35611	0.0335611	3.98451
TCF7L1	SLC36A1	-0.547849	2.50427	3.38637	5.71957	4.40384	0.0340384	3.98327
AR	IQCC	0.367399	3.1561	5.30195	5.71957	3.90224	0.0290224	3.98233
FOSB	UPP1	-0.307703	1.54464	3.47794	1.45388	8.73439	0.189255	3.97274
TEAD2	KIN	0.71921	4.15977	4.68192	5.71957	2.78105	0.0178105	3.96824
HEY2	PDE4A	0.778233	4.53593	4.43689	1.45193	3.07792	0.0566638	3.96608
AR	IGF1	0.299275	3.1561	2.97808	5.71957	5.48901	0.04489	3.96429
FOXL1	GPR1	-0.419946	4.70318	1.65614	0.668295	11.7962	0.153649	3.96206
NRL	UNC5C	0.611835	4.66716	2.13315	1.20052	3.78606	0.142922	3.95701
HOXA7	MTMR4	0.439125	2.78701	4.8421	5.71957	3.9522	0.029522	3.95466
ALX4	PITX2	-0.488863	4.72075	3.75624	5.71957	3.36775	0.0236775	3.95358
FOXF2	AMACR	-0.602965	4.48359	4.73947	5.71957	2.87331	0.0187331	3.94462
IRF1	LPAR6	-0.543209	2.65145	3.09573	5.71957	4.4607	0.034607	3.9368
ZIC1	TLE2	0.963297	2.66382	4.50288	0.844349	6.06137	0.0665078	3.93298
RFX1	ZNF212	0.679599	4.29055	4.6963	5.71957	2.79569	0.0179569	3.93191
HOXC10	RIMS2	-0.269485	3.72429	3.18973	5.71957	5.15242	0.0415242	3.91749
SIX2	FEM1C	-0.29938	3.14432	4.10583	5.71957	4.7377	0.037377	3.91457
AR	GSTM1	0.505921	3.1561	5.277	5.71957	3.39281	0.0239281	3.91248
AR	UPP1	-0.272191	3.1561	3.47794	1.13975	6.83424	0.167789	3.90492
REL	ELK4	0.46789	4.19823	4.42804	5.71957	3.3411	0.023411	3.8913
MAFB	SEC31B	0.676552	3.25379	4.98563	0.797249	6.00926	0.0735545	3.86754
MAFB	RAPGEF4	0.300897	3.25379	3.38241	0.811109	6.98669	0.206078	3.86738
HOXC10	HTR7	0.812183	3.72429	4.13194	1.48845	2.87629	0.0721423	3.86019
ZIC1	HHIPL1	0.786784	2.66382	3.6085	0.967425	7.74504	0.0681057	3.85933
NRL	RIMS3	0.827826	4.66716	4.89285	0.947723	3.26509	0.0659729	3.85919
AR	ZNF414	0.491706	3.1561	4.88509	5.71957	3.52402	0.0252402	3.85677
FOSB	THBD	0.806699	1.54464	5.32472	5.71957	3.72192	0.0272192	3.84451
HOXB5	CCDC97	0.773677	3.33933	4.76657	5.71957	2.88843	0.0188843	3.84196
RFX2	ALOX12	0.681035	1.69054	5.31995	5.71957	3.84894	0.0284894	3.84142
ZIC1	ZNF667	-0.334529	2.66382	4.29065	5.71957	4.71267	0.0371267	3.8263
MAF	SMPDL3A	0.848854	1.43172	4.68299	5.71957	3.95772	0.0295772	3.81048
AR	VSIG10	0.625377	3.1561	3.91026	5.71957	3.47618	0.0247618	3.79968
TCF7L1	KATNAL1	0.611814	2.50427	2.6231	5.71957	4.58867	0.0358867	3.7853
SIX1	TRMT5	-0.548797	2.092	5.03743	5.71957	3.91023	0.0291023	3.76423
FOXL1	CCDC68	0.368379	4.70318	3.19479	5.71957	3.98037	0.0298037	3.75566
HOXB5	MAP1LC3B2	0.250146	3.33933	5.09425	0.367021	15.0492	0.159694	3.75341
SOX5	LRRC4C	0.503876	2.37189	3.6248	5.71957	4.41612	0.0341612	3.73801
FOSB	SVEP1	0.222368	1.54464	1.58402	5.71957	11.4675	0.104675	3.73541
CEBPA	MARK1	0.546045	4.64148	2.99418	0.496916	8.91875	0.110881	3.72912
CEBPG	SLC14A2	-0.244683	3.13378	4.89875	5.71957	4.69382	0.0369382	3.72498
HOXB5	RCAN2	0.233006	3.33933	1.07462	5.71957	9.31618	0.0831618	3.70517
AR	DUSP7	-0.555599	3.1561	5.09878	5.71957	3.23214	0.0223214	3.68939
ZIC1	MAP1LC3B2	0.683361	2.66382	5.09425	5.71957	3.1837	0.021837	3.68742
FOXC2	EMX2	-0.209731	1.97151	3.4835	1.92509	4.5985	0.289085	3.6861
SIX2	FZD4	0.431305	3.14432	3.38751	5.71957	4.27852	0.0327852	3.68575
MAF	CPEB3	0.422214	1.43172	3.48375	0.284484	24.4296	0.251517	3.68111
FOS	SERPINE3	0.735087	2.29216	5.29533	5.71957	3.2302	0.022302	3.67632
BACH2	GPATCH8	0.320054	1.84639	3.3352	5.71957	6.21323	0.0521323	3.65138
GSC	CCDC97	0.584412	4.46241	4.76657	5.71957	2.8203	0.018203	3.65002
TCF7L1	CCDC112	0.437177	2.50427	4.35727	5.71957	4.18829	0.0318829	3.64345
FOXP2	TGFBRAP1	0.690121	4.37716	4.65145	5.71957	2.68218	0.0168218	3.62602
TEAD4	CCDC34	0.574452	4.0781	4.34614	5.71957	3.03913	0.0203913	3.60887
HOXD3	PAMR1	0.549872	3.51126	1.84617	2.3032	1.66957	0.26261	3.5995
SIX1	TNRC6A	0.68338	2.092	2.83827	5.71957	4.46717	0.0346717	3.59459
FOXF2	C2orf88	-0.308442	4.48359	4.47429	5.71957	3.72123	0.0272123	3.58375
MAFB	ABCA5	0.475187	3.25379	2.80556	5.71957	4.32589	0.0332589	3.5696
MAFB	SLPI	0.764963	3.25379	4.71806	0.813221	5.03536	0.0741869	3.56746
BACH2	NDUFV3	0.320029	1.84639	3.13225	5.71957	6.32363	0.0532363	3.56375
SIX1	CCDC69	0.510397	2.092	4.32753	5.71957	4.20305	0.0320305	3.55798
MAFB	ASAP2	-0.224666	3.25379	1.96285	5.71957	7.09897	0.0609897	3.55327
AR	VSTM4	0.533688	3.1561	3.75786	1.71376	1.50482	0.217338	3.54772
FOSB	HOXA13	0.831537	1.54464	5.32183	5.71957	3.55143	0.0255143	3.54259
FOXL1	NOS1AP	0.638929	4.70318	5.22321	4.21783	2.8635	0.0186583	3.53703
ZIC1	KCNMB2	0.200147	2.66382	4.20247	5.71957	5.76808	0.0476808	3.5245
MAFB	SLC18A2	-0.497528	3.25379	5.26339	5.71957	3.23516	0.0223516	3.52404
MAF	DENND2C	0.644691	1.43172	4.03243	5.71957	4.58648	0.0358648	3.50178
FOXL1	EPGN	-0.466673	4.70318	2.14423	5.71957	4.13882	0.0313882	3.49688
MAF	TRABD2B	0.252705	1.43172	3.85812	0.850438	12.4982	0.235439	3.49315
SIX1	FEM1C	-0.63674	2.092	4.10583	5.71957	3.86677	0.0286677	3.4676
MAF	ECM2	0.185508	1.43172	1.32251	5.71957	13.6473	0.126473	3.46759
NFIC	ZNF502	0.695792	4.28693	5.06466	5.71957	2.56459	0.0156459	3.46705
AR	KRT34	-0.307879	3.1561	2.76667	0.466702	8.24035	0.334738	3.46082
HOXA6	IGF1	0.527079	3.43122	2.97808	5.71957	3.8843	0.028843	3.45124
HOXA11	ADCY1	0.886945	4.03405	5.32768	5.71957	2.34651	0.0134651	3.44487
ZIC4	TMEM59L	0.79194	4.34749	4.67508	5.71957	2.49735	0.0149735	3.44258
AR	TUBGCP3	0.561405	3.1561	4.27652	5.71957	3.36198	0.0236198	3.44154
TCF7L2	LDLRAD2	0.767705	2.23722	5.17922	5.71957	3.13531	0.0213531	3.40621
TCF7L1	SERGEF	0.393752	2.50427	4.50383	5.71957	4.19019	0.0319019	3.39548
JUND	PDE10A	0.570001	2.82398	4.26796	5.71957	3.47764	0.0247764	3.38566
TCF7L2	PPARGC1A	0.726842	2.23722	4.96382	5.71957	3.25257	0.0225257	3.38247
FOXC2	LRCH4	0.520614	1.97151	4.9144	5.71957	3.9597	0.029597	3.3811
AR	SP140L	0.650718	3.1561	2.97551	0.453896	8.54921	0.142436	3.37759
JUN	HRCT1	0.802174	2.82703	4.73701	2.03212	4.45474	0.0347273	3.37711
NRL	MAP3K7CL	-0.703899	4.66716	2.26308	4.89431	1.07094	0.0865631	3.3733
MAFB	IFNAR2	-0.559175	3.25379	3.32553	0.342248	12.5993	0.128948	3.36435
SIX2	HOXA11	0.68337	3.14432	4.43106	1.02681	2.94838	0.116568	3.36003
SIX2	OGN	0.734318	3.14432	5.19202	0.643006	2.93935	0.14791	3.35129
TCF7L2	GPER1	0.605236	2.23722	5.05579	5.71957	3.46535	0.0246535	3.34512
SIX2	PIGC	0.260419	3.14432	4.20714	5.71957	4.64478	0.0364478	3.33569
TCF7L2	ADO	-0.555945	2.23722	4.06062	5.71957	3.93232	0.0293232	3.33085
BACH2	RAD51B	0.305641	1.84639	1.04466	5.71957	10.4437	0.0944365	3.32558
TCF7L1	TMEM159	-0.388933	2.50427	3.82116	5.71957	4.48211	0.034821	3.32229
NRL	ZNF483	0.380742	4.66716	3.51356	5.71957	3.59069	0.0259069	3.3219
TCF7L2	DNAJC16	0.911812	2.23722	3.35944	5.71957	3.45027	0.0245027	3.31369
HEY2	NXNL2	0.786268	4.53593	4.44404	0.446189	5.84215	0.0798852	3.30045
DBP	KLHL2	0.399367	3.91504	4.71556	5.71957	3.34169	0.0234169	3.29992
SIX2	PRKAB2	-0.263907	3.14432	4.17677	5.71957	4.61008	0.0361008	3.29919
AR	GNPDA1	0.675948	3.1561	3.61666	5.71957	3.27837	0.0227837	3.29624
MAFK	YIPF6	0.441552	2.45727	4.09858	5.71957	4.13342	0.0313342	3.29427
NR4A2	NRN1	0.39511	3.53918	4.47566	5.71957	3.57334	0.0257334	3.29165
MAFF	OPHN1	0.231652	3.50182	3.09028	5.71957	5.3147	0.043147	3.28791
CEBPA	BCL2L14	-0.363735	4.64148	4.73212	1.00331	3.63736	0.112639	3.28403
HOXB3	LRRC4C	0.428785	1.3108	3.6248	5.71957	5.83044	0.0483044	3.28179
TCF7L2	AGO1	0.687569	2.23722	3.78365	5.71957	3.67926	0.0267926	3.28152
CEBPA	CTNNBIP1	0.766113	4.64148	4.98641	2.20694	3.42986	0.0244412	3.28039
AR	DOCK11	-0.353942	3.1561	3.61998	5.71957	4.29793	0.0329793	3.27833
AR	BCL2L11	0.891379	3.1561	4.36836	5.71957	2.71672	0.0171672	3.27824
FOXC2	GSC	0.887093	1.97151	4.93199	0.636093	6.9761	0.0855176	3.27325
ZIC1	AGO1	0.566451	2.66382	3.78365	5.71957	3.70241	0.0270241	3.26722
AR	ABL2	0.290431	3.1561	4.21282	0.941172	6.19351	0.145068	3.26545
MAF	CYP2R1	0.611844	1.43172	3.50401	0.742606	7.149	0.199953	3.25834
AR	NFASC	-0.241107	3.1561	2.21384	2.03228	3.62309	0.260756	3.23448
AR	PRDM6	0.246511	3.1561	3.78479	1.53504	5.65841	0.126326	3.23099
NR4A2	RFX7	-0.784128	3.53918	4.22111	5.71957	2.75197	0.0175197	3.23035
BACH2	ADAR	0.602751	1.84639	2.83377	5.71957	4.75859	0.0375859	3.22622
NRL	ZSCAN9	0.851683	4.66716	5.01592	5.71957	2.25358	0.0125357	3.22157
HOXD3	SLC25A33	0.570664	3.51126	4.92378	5.71957	2.94073	0.0194073	3.22051
TCF7L2	GGT7	0.751113	2.23722	3.83068	5.71957	3.49944	0.0249944	3.22027
HOXB8	IGF1	0.506025	4.01038	2.97808	5.71957	3.58637	0.0258637	3.20628
NRL	KLHL24	0.562406	4.66716	1.16063	5.71957	4.81789	0.0381789	3.20509
MAFB	ABHD15	-0.494294	3.25379	4.43651	5.71957	3.3385	0.023385	3.18618
AR	GPR153	-0.353318	3.1561	5.14462	5.71957	3.65351	0.0265351	3.18101
TEAD4	GLIS1	-0.334768	4.0781	3.24356	0.856028	6.08281	0.137931	3.18037
FOXC2	NAT1	-0.257719	1.97151	5.118	5.71957	5.15059	0.0415059	3.17961
MAFB	TRABD2B	0.213825	3.25379	3.85812	0.627562	11.0287	0.171134	3.17937
ZIC1	ZBTB47	0.815367	2.66382	4.61754	0.679272	5.17963	0.0900326	3.17696
HOXB5	GRIA3	-0.152492	3.33933	1.11582	5.71957	10.387	0.0938702	3.16872
HOXD9	EPGN	-0.291895	4.42625	2.14423	5.71957	4.99378	0.0399378	3.16017
AR	MAGEF1	0.654656	3.1561	4.83234	1.86232	3.58506	0.0473771	3.15821
MAFB	AKR1C2	0.756183	3.25379	3.2745	0.762975	4.04581	0.126871	3.1553
HOXA6	KCNMB2	0.915096	3.43122	4.20247	0.450351	5.97902	0.0885219	3.14522
SIX1	ZNF667	-0.664094	2.092	4.29065	5.71957	3.57816	0.0257816	3.14519
ZIC1	GTF2IRD2	0.814276	2.66382	3.84255	0.382855	9.69781	0.101593	3.14389
ZIC4	SERPINE3	0.451396	4.34749	5.29533	5.71957	2.85214	0.0185214	3.13977
AR	OSGIN1	0.654548	3.1561	4.41068	5.71957	3.00349	0.0200349	3.13599
IRF1	C14orf39	0.827746	2.65145	5.20684	5.71957	2.74618	0.0174618	3.13427
TEF	APOL3	0.773892	3.81032	4.71057	1.27199	4.14995	0.0427433	3.13408
HOXC4	GLIS1	-0.22858	4.26209	3.24356	1.24596	5.88205	0.13528	3.13293
ZIC1	OLFML1	0.114912	2.66382	3.9713	5.71957	7.20938	0.0620938	3.11253
RFX1	BAMBI	-0.515289	4.29055	2.75447	5.71957	3.52641	0.0252641	3.10313
NFIB	ZNF502	0.672426	2.00021	5.06466	5.71957	3.36522	0.0236522	3.10113
BACH2	ZNF182	0.125168	1.84639	5.0987	5.71957	7.29692	0.0629692	3.09676
TEF	SLC15A3	0.608202	3.81032	4.57517	5.71957	2.81381	0.0181381	3.09505
BACH2	OGDH	0.479716	1.84639	2.65678	5.71957	5.32006	0.0432005	3.09338
ELF4	LRRC4C	0.610255	4.3383	3.6248	5.71957	2.9251	0.019251	3.09082
HOXA2	LRRC4C	0.228401	4.5324	3.6248	5.71957	4.32506	0.0332505	3.08649
DBP	SLPI	0.662302	3.91504	4.71806	0.848045	4.86195	0.0610311	3.07848
BACH2	AIFM1	0.412443	1.84639	4.37052	5.71957	4.54964	0.0354964	3.0743
AR	RTP4	0.880987	3.1561	5.26084	5.71957	2.48077	0.0148077	3.07337
HOXB5	ZNF212	0.606882	3.33933	4.6963	5.71957	2.92135	0.0192135	3.05543
HOXB9	LRRC4C	0.776377	4.51574	3.6248	5.71957	2.6096	0.016096	3.05311
AR	TLR3	0.290509	3.1561	5.00379	5.71957	3.9422	0.029422	3.04357
MAF	NOC3L	-0.466604	1.43172	4.45726	5.71957	4.75663	0.0375663	3.04325
AR	CAMTA2	-0.525475	3.1561	3.35817	5.71957	3.62452	0.0262452	3.03019
MAFB	TMEM200A	-0.192085	3.25379	0.449654	5.71957	14.236	0.13236	3.02881
TCF7L1	TAF1B	0.433407	2.50427	3.41261	5.71957	4.31237	0.0331237	3.0261
HOXB8	ZNF212	0.796971	4.01038	4.6963	5.71957	2.44248	0.0144248	3.02475
TCF7L1	HAUS6	0.643478	2.50427	4.26483	5.71957	3.3144	0.023144	3.01525
CEBPG	ABCA5	0.777768	3.13378	2.80556	5.71957	3.32065	0.0232065	3.01394
AR	CYTH3	0.277157	3.1561	3.57415	5.71957	4.63419	0.0363419	3.01157
TCF7L1	PHF7	0.293447	2.50427	5.10921	5.71957	4.27308	0.0327308	3.00349
SIX2	NME5	-0.230645	3.14432	4.61121	5.71957	4.49205	0.0349205	3.00036
NRL	BCL2L11	0.571883	4.66716	4.36836	5.71957	2.67803	0.0167803	2.9968
JUN	PDE10A	0.641312	2.82703	4.26796	5.71957	3.14964	0.0214964	2.99648
SIX1	GAK	0.75036	2.092	3.9909	5.71957	3.43412	0.0243412	2.99518
TCF7L2	FMO3	0.286046	2.23722	4.12174	0.589351	11.0174	0.174766	2.99319
SIX2	CACNB2	0.655146	3.14432	4.32607	5.71957	2.97132	0.0197132	2.98558
CEBPA	ERMN	0.151194	4.64148	4.70375	5.71957	4.50598	0.0350598	2.98261
BACH2	EFHD1	0.811164	1.84639	2.32512	0.530848	5.81405	0.277037	2.9776
GSC	FOXC2	0.887093	4.46241	2.44269	5.71957	2.8693	0.018693	2.96637
TEF	LIPC	0.586315	3.81032	3.53929	5.71957	3.10858	0.0210858	2.96431
NRL	GIGYF2	0.697267	4.66716	3.25144	5.71957	2.76861	0.0176861	2.96336
THRB	TMEM254	0.626081	3.79106	4.8025	5.71957	2.68939	0.0168939	2.96214
NFATC2	XG	0.707661	3.12279	2.58709	2.93375	1.05596	0.166266	2.94478
MAF	APBB1IP	0.566451	1.43172	0.338822	0.466689	23.542	0.972619	2.93634
FOS	LANCL2	0.686837	2.29216	3.82499	5.71957	3.4599	0.024599	2.9314
FOXL1	NTF3	-0.361043	4.70318	2.65723	5.71957	3.90341	0.0290341	2.92479
NRL	NOA1	0.627963	4.66716	4.35178	5.71957	2.5631	0.015631	2.92259
BACH2	MTHFD2L	0.179362	1.84639	3.99292	5.71957	6.7285	0.057285	2.91519
TEAD4	C3orf62	-0.571739	4.0781	5.0676	5.71957	2.63431	0.0163431	2.90953
SIX1	LPIN3	-0.698614	2.092	4.51386	2.20327	3.65109	0.0547558	2.9058
TEF	DHX33	-0.455503	3.81032	3.91922	5.71957	3.27768	0.0227768	2.90452
BACH2	SLC25A20	0.534518	1.84639	4.97149	5.71957	3.75242	0.0275242	2.89843
AR	PDE4A	0.713764	3.1561	4.43689	1.91251	1.05902	0.142924	2.89331
AR	ENPP2	-0.225253	3.1561	0.953562	2.04127	12.011	0.173991	2.89186
HOXA11	GRIA3	-0.170381	4.03405	1.11582	5.71957	8.63315	0.0763315	2.89064
MAFB	FAM160A1	0.696953	3.25379	2.22573	0.856685	6.32373	0.105631	2.88837
NRL	FGFBP3	0.689497	4.66716	5.27396	5.71957	2.29517	0.0129517	2.88553
SIX2	NLRP10	-0.14644	3.14432	3.3316	2.53984	1.23001	0.60174	2.88378
NRL	ITM2C	0.710081	4.66716	4.06552	5.71957	2.49367	0.0149367	2.87034
ZIC4	CYP11A1	0.935138	4.34749	5.12748	4.98417	2.23468	0.0123562	2.86886
FOXC2	LZTS3	0.596262	1.97151	5.05187	0.614369	9.32625	0.0843024	2.86855
TEF	RTP4	0.712373	3.81032	5.26084	3.3903	2.98056	0.0198513	2.8645
NRL	MAPK8IP1	0.805527	4.66716	5.08035	5.43233	2.23327	0.0123383	2.85897
SIX2	SMAD3	0.775907	3.14432	2.00143	2.69383	3.99739	0.0543516	2.85783
ZIC1	MLXIPL	0.75609	2.66382	5.30956	5.71957	2.71462	0.0171462	2.84693
HOXA6	ADAMTSL3	0.86768	3.43122	1.22978	0.401687	13.1538	0.146781	2.83949
HOXA10	EPGN	-0.47359	0.544789	2.14423	5.71957	9.97677	0.0897677	2.83384
AR	ADCY1	0.820998	3.1561	5.32768	5.71957	2.4579	0.014579	2.82935
FOXC2	ZNF667	-0.217332	1.97151	4.29065	0.85554	12.4627	0.144022	2.8231
FOSB	CYP27C1	-0.175392	1.54464	4.14957	5.71957	7.14227	0.0614227	2.82076
CEBPA	CPEB3	0.611986	4.64148	3.48375	5.71957	2.78581	0.0178581	2.81575
ZIC1	SYNDIG1	0.683361	2.66382	2.15429	0.535043	4.68629	0.285454	2.80681
BACH2	UQCC1	0.363807	1.84639	3.34832	5.71957	5.19639	0.0419639	2.80519
IRF1	TMEM200B	0.621075	2.65145	5.15764	2.00865	2.60193	0.0631591	2.80358
IRF1	RFK	0.483063	2.65145	4.73568	5.71957	3.38139	0.0238139	2.79355
NRL	ADPRH	0.788708	4.66716	5.15611	0.662266	4.97076	0.044614	2.78752
NRL	PIGC	0.859143	4.66716	4.20714	3.04391	2.87916	0.0188485	2.78663
RFX1	SLC1A2	0.230181	4.29055	4.99002	5.71957	3.68233	0.0268233	2.78408
HOXC10	TUFT1	-0.706163	3.72429	2.78545	5.71957	3.1247	0.021247	2.78171
PRRX2	FMO3	0.583291	0.372399	4.12174	0.454762	24.0429	0.283205	2.77234
RFX1	CLN6	0.574764	4.29055	4.5911	5.71957	2.62731	0.0162731	2.76861
PRRX2	LINC00346	0.657345	0.372399	4.81882	5.71957	6.92452	0.0592452	2.76789
HOXA7	HOXA7	1	2.78701	3.16578	1.27992	1.47309	0.166133	2.76368
IRF1	SERPINE3	0.626811	2.65145	5.29533	5.71957	2.89587	0.0189587	2.76353
NRL	OSGIN1	0.827435	4.66716	4.41068	5.71957	2.25545	0.0125545	2.7586
FOXC2	TACR1	0.277637	1.97151	5.18165	0.539129	11.3795	0.158532	2.75853
AR	CYP27C1	-0.275573	3.1561	4.14957	2.35263	2.07473	0.156489	2.7567
IRF1	PIGC	0.495615	2.65145	4.20714	5.71957	3.49113	0.0249113	2.75005
MAFB	SLC25A25	0.582703	3.25379	5.13138	0.423198	7.62701	0.0875281	2.74863
TCF7L2	RNF114	0.807185	2.23722	4.42132	5.71957	3.00186	0.0200186	2.74423
BACH2	KCNA1	0.39307	1.84639	5.31933	5.71957	4.05795	0.0305795	2.74001
TCF7L1	PROCR	0.59292	2.50427	4.20941	5.71957	3.31291	0.0231291	2.73924
HOXC10	PRR16	-0.389171	3.72429	4.56681	5.71957	3.23511	0.0223511	2.73745
MAFB	ITGA2	-0.276441	3.25379	2.15542	5.71957	5.49361	0.0449361	2.73741
MAFF	VSTM2L	0.330836	3.50182	4.75495	5.71957	3.48735	0.0248735	2.73306
HOXC10	ERC1	0.712174	3.72429	3.32496	5.71957	2.88009	0.0188009	2.73126
TCF7L2	TMEM200B	0.750758	2.23722	5.15764	0.942295	3.25975	0.102616	2.73052
HOXA7	PAMR1	0.472637	2.78701	1.84617	5.00461	1.25349	0.178925	2.72961
ALX4	LINC00346	0.457788	4.72075	4.81882	5.71957	2.69717	0.0169717	2.72655
IRF1	TCF7L2	0.912443	2.65145	2.14853	5.71957	3.56617	0.0256617	2.7207
IRF1	UNC5C	0.699697	2.65145	2.13315	1.10895	3.87802	0.159833	2.72024
HOXC10	IAH1	0.81547	3.72429	3.33714	5.71957	2.72252	0.0172252	2.71847
SIX2	CCZ1	0.685939	3.14432	3.42407	5.71957	3.08264	0.0208264	2.71179
NRL	GAS2L1	0.693904	4.66716	4.75022	5.71957	2.32294	0.0132294	2.70401
FOSB	MRAS	-0.237664	1.54464	2.62526	5.71957	7.52013	0.0652013	2.70275
CEBPA	TRAF3	-0.539386	4.64148	2.62846	5.71957	3.22436	0.0222436	2.69942
SIX1	ZCWPW1	0.412682	2.092	4.9311	5.71957	3.86472	0.0286472	2.69578
HOXA3	SCG2	0.255469	1.61208	5.04446	5.71957	5.28913	0.0428913	2.69561
LEF1	LRRC2	0.728987	4.7403	2.65258	5.71957	2.82036	0.0182036	2.69165
HOXB8	MAP1LC3B2	0.419248	4.01038	5.09425	0.237996	11.6648	0.11318	2.69125
FOSB	CCDC34	0.511032	1.54464	4.34614	5.71957	4.23664	0.0323664	2.69066
SIX2	ADCY1	0.708851	3.14432	5.32768	5.71957	2.5521	0.015521	2.69029
SIX1	NLRP10	-0.226613	2.092	3.3316	4.86299	1.14701	0.305343	2.69004
CEBPD	CYP2R1	0.713545	2.88805	3.50401	1.1579	5.04059	0.0637564	2.68699
AR	AMBRA1	0.612008	3.1561	0.272348	5.71957	9.96252	0.0896252	2.68655
AR	CAPRIN1	0.447028	3.1561	2.49969	5.71957	4.18278	0.0318278	2.68539
RXRB	ZNF624	0.596937	4.1993	5.18886	5.71957	2.4631	0.014631	2.68101
HOXB8	EMX2	-0.464437	4.01038	3.4835	0.962453	2.98007	0.143861	2.67717
RXRB	ABCB5	0.232328	4.1993	5.33098	5.71957	3.53947	0.0253947	2.6738
ZIC1	SCAMP5	0.794669	2.66382	4.28008	0.606557	7.4309	0.0651431	2.66026
ZIC1	TREH	0.780007	2.66382	5.32557	5.71957	2.60842	0.0160842	2.65528
FOXC2	RIMS3	0.664836	1.97151	4.89285	0.69357	6.37251	0.0935443	2.65151
HOXB5	SYTL3	0.747668	3.33933	4.03411	0.628052	3.40979	0.122927	2.65149
CEBPA	KLHL2	0.350082	4.64148	4.71556	5.71957	3.00945	0.0200945	2.65025
RFX2	AGO1	0.481001	1.69054	3.78365	5.71957	4.41172	0.0341172	2.64867
BACH2	SARDH	0.214338	1.84639	5.26709	5.71957	5.23919	0.0423919	2.64792
HOXC11	PDHB	0.631189	4.46642	3.65755	5.71957	2.67683	0.0167683	2.64717
FOXF2	ZNF592	0.735615	4.48359	4.57018	5.71957	2.32047	0.0132047	2.64165
TEAD4	ARHGEF37	-0.693454	4.0781	5.18062	5.71957	2.34435	0.0134435	2.64092
HOXC4	NOA1	0.653924	4.26209	4.35178	5.71957	2.51382	0.0151382	2.63991
ZIC1	MXRA5	-0.334825	2.66382	2.30101	0.793703	6.16205	0.262703	2.63688
FOSL1	EFHD2	0.531129	1.31107	3.93447	5.71957	4.61934	0.0361934	2.6199
AR	LRRN4CL	-0.272838	3.1561	3.89462	5.71957	4.22759	0.0322759	2.61732
ETV3	SIX1	0.752098	4.25738	2.54692	5.71957	2.91789	0.0191789	2.6103
BACH2	CDC14A	0.288646	1.84639	4.52413	5.71957	4.87581	0.0387581	2.60614
MAFB	MARK1	0.549972	3.25379	2.99418	0.789377	5.34006	0.11536	2.60553
HOXB5	GLIS1	-0.192977	3.33933	3.24356	0.788934	10.8088	0.146149	2.60497
MAFB	BLNK	0.806227	3.25379	5.32225	5.71957	2.37302	0.0137302	2.60187
RFX1	DCK	-0.629565	4.29055	5.05417	5.71957	2.39143	0.0139143	2.59828
MAFF	SOX30	0.42379	3.50182	5.11736	5.71957	2.99559	0.0199559	2.59661
AR	TXNDC16	0.381116	3.1561	4.93187	0.82349	3.60027	0.147439	2.59314
ERG	SLC35F1	-0.135268	4.38615	1.6565	0.921459	9.74691	0.293475	2.59051
ETV2	LRRC4C	0.531118	4.71737	3.6248	5.71957	2.78803	0.0178803	2.58946
NRL	AMACR	-0.4005	4.66716	4.73947	5.71957	2.80755	0.0180755	2.57139
MAFK	CAPRIN2	-0.530781	2.45727	2.1134	5.71957	4.56783	0.0356783	2.56938
HOXB5	HTRA3	0.590381	3.33933	4.09055	5.71957	2.91149	0.0191149	2.567
HOXA6	SCG2	0.216516	3.43122	5.04446	5.71957	3.99295	0.0299295	2.56159
BACH2	CYTH3	0.106231	1.84639	3.57415	5.71957	8.50495	0.0750495	2.55935
ZIC1	FAM117A	0.495227	2.66382	5.01393	5.47653	3.20414	0.0220489	2.55913
AR	SYT14	-0.564757	3.1561	1.41205	0.949732	3.38071	0.316478	2.55751
HOXA3	LRRC4C	0.109207	1.61208	3.6248	5.71957	8.88171	0.0788171	2.55508
BACH2	SERPINE3	0.13761	1.84639	5.29533	5.71957	6.28125	0.0528125	2.55278
AR	IL7R	0.443247	3.1561	4.32565	1.08808	2.10684	0.184013	2.55264
BACH2	B4GALT4	-0.225045	1.84639	2.63458	5.71957	6.90425	0.0590425	2.5524
HOXA11	UNC5C	0.542919	4.03405	2.13315	5.71957	3.62605	0.0262605	2.54448
ZIC1	ZNF624	0.348251	2.66382	5.18886	0.510284	10.6057	0.0973531	2.53612
GSC	BST1	0.840816	4.46241	1.00607	3.78444	4.73623	0.0374162	2.53158
JUN	LINC00346	0.78712	2.82703	4.81882	5.71957	2.58784	0.0158784	2.5201
MAFK	OSGIN1	0.649504	2.45727	4.41068	5.71957	3.04993	0.0204993	2.51729
SIX1	TMEM59L	0.702673	2.092	4.67508	5.71957	3.07813	0.0207813	2.51435
HOXD3	ZNF354C	0.456627	3.51126	5.04628	1.41603	3.06705	0.0715473	2.5141
TCF7L1	PODNL1	-0.501991	2.50427	2.67169	5.71957	4.15169	0.0315169	2.5136
TEAD2	PRR16	-0.408405	4.15977	4.56681	5.71957	2.92898	0.0192898	2.50716
AR	KPTN	0.604928	3.1561	5.20527	5.71957	2.65789	0.0165789	2.5047
ERG	SH2B3	0.350652	4.38615	3.13027	5.71957	3.55405	0.0255405	2.49953
AR	DCLK1	0.322164	3.1561	1.55937	2.26488	1.45982	0.475556	2.493
HLF	IL20RB	0.643166	4.74536	4.99996	5.71957	2.2624	0.012624	2.49279
PKNOX2	PHYHIPL	0.500915	3.80394	5.32828	5.71957	2.63092	0.0163092	2.49165
AR	SOX30	0.204639	3.1561	5.11736	5.71957	4.16266	0.0316266	2.4887
BACH2	SKP1	0.287953	1.84639	3.97748	5.71957	5.05987	0.0405987	2.48467
ZIC1	NOP2	-0.200016	2.66382	4.59559	5.71957	4.73788	0.0373788	2.48019
HOXC11	LANCL3	0.448214	4.46642	4.95087	5.71957	2.64929	0.0164929	2.47695
ZIC4	HHIPL1	0.786179	4.34749	3.6085	0.842406	5.37795	0.044279	2.47412
MAF	SLC18A2	-0.497173	1.43172	5.26339	5.71957	3.93448	0.0293448	2.47408
BACH2	ABCB6	-0.423231	1.84639	3.66837	5.71957	4.41629	0.0341629	2.47372
TCF7L2	PEX11A	0.866718	2.23722	4.90317	5.71957	2.69011	0.0169011	2.47236
FOSB	DBT	0.509421	1.54464	4.28788	5.71957	4.11123	0.0311123	2.46838
IRF1	RPP30	-0.488125	2.65145	3.96266	5.71957	3.4372	0.0243719	2.45731
SIX1	LANCL2	0.636243	2.092	3.82499	5.71957	3.44668	0.0244668	2.4556
THRB	LNX1	0.606524	3.79106	5.06759	5.71957	2.48335	0.0148335	2.45503
TCF7L1	ELK4	0.200052	2.50427	4.42804	5.71957	4.92688	0.0392688	2.45481
AR	ASAP2	-0.31634	3.1561	1.96285	5.71957	5.20346	0.0420346	2.45163
FOXL1	ZNF667	-0.412239	4.70318	4.29065	1.52842	4.90294	0.0393092	2.45053
JUN	GIGYF2	0.763297	2.82703	3.25144	5.71957	3.01998	0.0201998	2.44802
ATF2	ZNF470	0.676123	3.21258	4.68487	5.71957	2.6092	0.016092	2.44376
MYC	ZNF568	0.669128	2.82788	3.95829	5.71957	2.93999	0.0193998	2.44334
IRF1	GAS2L1	0.600501	2.65145	4.75022	3.0731	3.77595	0.0278326	2.44269
MAFB	ERMN	0.106951	3.25379	4.70375	5.71957	5.62576	0.0462576	2.43638
ZIC1	PPP1R26	0.626973	2.66382	5.19138	5.71957	2.76913	0.0176913	2.42943
FOXC2	BBC3	0.750198	1.97151	4.71466	0.715561	3.81947	0.127461	2.42913
HOXD9	FHAD1	0.677583	4.42625	4.1551	5.71957	2.41073	0.0141073	2.42402
TEF	PIGT	0.797373	3.81032	3.16738	5.71957	2.65621	0.0165621	2.42138
HOXD8	LANCL3	0.184068	4.16452	4.95087	1.04009	7.34723	0.0832782	2.41519
BACH2	ING1	0.345246	1.84639	5.07884	5.71957	4.14373	0.0314373	2.41223
AR	ADPRH	0.411586	3.1561	5.15611	0.527968	7.46029	0.0912974	2.40855
CEBPA	CDK15	-0.446713	4.64148	4.86602	0.502254	4.10563	0.115709	2.4073
HOXC10	HAPLN3	-0.238862	3.72429	1.96721	5.71957	5.42533	0.0442533	2.40313
AR	ADAMTSL3	0.757893	3.1561	1.22978	0.959979	3.70675	0.22957	2.40302
TEF	YPEL1	0.64532	3.81032	4.88262	5.71957	2.43571	0.0143571	2.40129
SIX2	ADA	0.528459	3.14432	5.17363	0.429223	7.41229	0.0877745	2.40069
IRF1	PEX11A	0.735186	2.65145	4.90317	5.71957	2.65257	0.0165257	2.39633
HOXA10	LRRC4C	0.278639	0.544789	3.6248	5.71957	9.23497	0.0823497	2.3934
ZIC4	CLEC3B	0.489445	4.34749	4.10074	0.947158	3.31769	0.08728	2.39319
ZIC4	TMEM129	0.719603	4.34749	4.84648	4.12092	2.51783	0.0152027	2.39166
JUN	PIGC	0.886656	2.82703	4.20714	5.71957	2.55203	0.0155203	2.38903
HOXC5	ABCA5	0.396009	4.67699	2.80556	5.71957	3.37867	0.0237867	2.38856
FOXF2	PIGT	0.605048	4.48359	3.16738	5.71957	2.76057	0.0176057	2.38853
MAF	CDK15	-0.428498	1.43172	4.86602	3.52941	1.23218	0.183258	2.37913
HOXC9	LHFPL5	-0.234363	3.16558	4.96917	5.71957	3.89567	0.0289567	2.3786
CEBPA	ENTPD5	-0.639769	4.64148	4.73686	5.71957	2.29053	0.0129053	2.37814
HOXD3	ACAP2	0.521243	3.51126	4.85315	5.71957	2.71997	0.0171997	2.3767
FOSB	PRDM6	0.372456	1.54464	3.78479	5.71957	4.8943	0.038943	2.3737
BACH2	CTU1	0.287073	1.84639	4.65281	5.71957	4.63244	0.0363244	2.37359
FOXC2	TRIM41	0.402134	1.97151	4.92383	5.71957	3.79826	0.0279826	2.37306
ZIC4	TREH	0.923191	4.34749	5.32557	3.37653	2.37798	0.0138166	2.37125
TEF	RBM23	0.714008	3.81032	4.63534	5.71957	2.38004	0.0138004	2.36912
HOXD3	TMEM68	0.489786	3.51126	4.35306	5.71957	2.90465	0.0190465	2.36885
HOXB5	RTP4	0.805185	3.33933	5.26084	5.71957	2.28235	0.0128235	2.3679
IRF1	PPARGC1A	0.523251	2.65145	4.96382	5.71957	3.0023	0.020023	2.36786
TEAD4	HTRA3	0.36297	4.0781	4.09055	5.71957	3.15794	0.0215794	2.36003
TCF7L1	LANCL3	0.207721	2.50427	4.95087	0.288636	17.6787	0.17954	2.35942
BACH2	NFASC	-0.22975	1.84639	2.21384	0.94823	4.00899	0.660878	2.35937
MAF	RNF217	0.643852	1.43172	1.9201	5.71957	5.35337	0.0435337	2.35931
AR	ANKRD12	0.449519	3.1561	3.32213	5.71957	3.49706	0.0249706	2.35403
CEBPA	KCTD1	0.627125	4.64148	4.10537	5.71957	2.42097	0.0142097	2.35125
ZIC1	PRRX2	0.529638	2.66382	1.02148	0.66267	5.99689	0.410406	2.35044
MAF	HAPLN1	-0.221566	1.43172	1.42743	0.440174	29.0351	0.406076	2.35003
CTCF	IGF1	0.379159	2.22212	2.97808	5.71957	4.57729	0.0357729	2.34991
FOSB	CYTH3	0.297452	1.54464	3.57415	5.71957	5.52063	0.0452063	2.34405
HOXB5	PPARGC1A	0.696438	3.33933	4.96382	5.71957	2.44758	0.0144758	2.33938
HOXA5	LRRC4C	0.181815	1.5395	3.6248	5.71957	6.86506	0.0586506	2.33654
IRF1	PDE10A	0.31651	2.65145	4.26796	0.845808	7.34592	0.104953	2.33562
IRF1	P2RY11	0.702443	2.65145	5.08454	1.2281	4.26471	0.0470882	2.33551
HOXC6	MAP1LC3B2	0.181781	2.69343	5.09425	0.920341	8.60602	0.1182	2.33508
BACH2	CCDC120	0.528008	1.84639	5.22304	5.71957	3.36684	0.0236684	2.32082
FOXC2	TMEM200A	-0.118363	1.97151	0.449654	5.71957	20.1597	0.191597	2.3181
MAF	ABCA5	0.452761	1.43172	2.80556	5.71957	5.24621	0.0424621	2.31717
ZIC1	HSPA12A	-0.117474	2.66382	4.06574	5.71957	6.16427	0.0516427	2.31655
AR	FILIP1	0.383446	3.1561	5.05968	0.646477	4.60082	0.127091	2.31463
ZIC4	ELF4	0.514485	4.34749	4.89776	5.71957	2.48558	0.0148558	2.31364
NRL	EYA4	0.4143	4.66716	2.56215	1.9499	4.17544	0.0573368	2.3127
MAFB	TSHR	0.445738	3.25379	3.79067	0.908059	4.38835	0.105534	2.31202
MAFK	EYA4	0.795119	2.45727	2.56215	1.50988	5.73914	0.0532101	2.3082
HOXC10	RANBP2	0.633975	3.72429	3.14584	5.71957	2.88197	0.0188197	2.30419
FOSB	ING1	0.741653	1.54464	5.07884	5.71957	3.17837	0.0217837	2.30405
FOXF2	MAP1LC3B2	0.268298	4.48359	5.09425	5.71957	3.1117	0.021117	2.30313
HOXA11	TBC1D30	0.754864	4.03405	5.3002	2.73482	2.832	0.0183899	2.29881
AR	NOS1AP	0.70211	3.1561	5.22321	5.71957	2.42849	0.0142849	2.29652
MAFB	NOL3	0.69619	3.25379	4.5484	3.06401	2.41686	0.0300957	2.29626
AR	ZFC3H1	-0.428637	3.1561	3.00278	5.71957	3.6826	0.026826	2.2953
HOXA11	DMGDH	-0.191193	4.03405	3.32267	5.71957	4.48775	0.0348775	2.29424
NRL	TRMT12	0.825032	4.66716	5.09104	5.71957	2.01149	0.0101149	2.28125
FOSB	DNAJC16	0.544253	1.54464	3.35944	5.71957	4.28783	0.0328783	2.27722
FOXC2	ENTPD1	0.249325	1.97151	5.09758	1.3174	6.20856	0.110829	2.27138
FOXF2	SERPINE3	0.738695	4.48359	5.29533	5.71957	2.08492	0.0108492	2.26901
FOXD2	SYTL4	0.903378	4.67979	4.8156	5.71957	1.9823	0.00982301	2.26738
MAFB	SNRPC	-0.64779	3.25379	2.72381	5.71957	3.17427	0.0217427	2.26632
FOSB	DHX34	-0.384012	1.54464	4.6733	5.71957	4.30696	0.0330696	2.25818
SIX2	LINC00346	0.380728	3.14432	4.81882	5.71957	3.15815	0.0215815	2.24885
HOXA11	LRRN4CL	-0.290738	4.03405	3.89462	5.71957	3.47544	0.0247544	2.24767
IRF1	HOXB5	0.615277	2.65145	3.66539	0.729988	6.06609	0.0847858	2.24504
TCF7L2	EFHD2	0.505464	2.23722	3.93447	5.71957	3.51168	0.0251168	2.24454
ERG	WDR5	0.424309	4.38615	4.64429	1.09201	4.07671	0.058291	2.24297
CEBPA	STX6	0.852643	4.64148	3.12287	5.71957	2.34934	0.0134934	2.24082
JUNB	HRCT1	0.496871	2.1397	4.73701	5.71957	3.33003	0.0233003	2.23499
MAFK	C1S	0.829197	2.45727	3.25769	5.71957	2.97697	0.0197697	2.23439
HOXA6	EMX2	-0.469581	3.43122	3.4835	0.890541	2.85548	0.156463	2.23315
HOXD9	CEACAM19	-0.470684	4.42625	2.65075	5.71957	3.20478	0.0220478	2.23184
FOSB	DAPK2	0.46469	1.54464	1.54914	5.71957	6.44069	0.0544068	2.22858
HOXD9	TMEM200A	-0.363143	4.42625	0.449654	5.71957	7.85753	0.0685753	2.22745
BACH2	KIF27	-0.116279	1.84639	3.21225	5.71957	8.02448	0.0702448	2.22346
RXRB	TRABD2B	0.507192	4.1993	3.85812	0.856493	2.81191	0.112337	2.22317
GSC	AKAP8	0.555894	4.46241	4.72108	5.71957	2.38901	0.0138901	2.22275
IRF1	PITPNM2	0.881079	2.65145	4.18526	5.71957	2.55355	0.0155355	2.21848
TEF	SYTL4	0.648662	3.81032	4.8156	5.71957	2.37317	0.0137317	2.21844
CEBPA	TSLP	0.244264	4.64148	5.25217	5.71957	3.09938	0.0209938	2.21607
TCF7L1	CCDC24	0.466649	2.50427	5.20505	5.71957	3.0713	0.020713	2.21323
MAFB	KLHL2	0.331723	3.25379	4.71556	5.71957	3.29722	0.0229722	2.20502
MAFB	CLP1	0.582951	3.25379	5.11303	5.71957	2.55388	0.0155388	2.2013
AR	FAM86B1	0.435739	3.1561	5.23327	5.71957	2.86222	0.0186222	2.19405
RFX2	PITPNM2	0.695672	1.69054	4.18526	5.71957	3.33495	0.0233495	2.19221
HOXA3	GRIA3	-0.25496	1.61208	1.11582	5.71957	9.65168	0.0865168	2.19039
RXRB	PAMR1	0.424825	4.1993	1.84617	1.48634	2.2234	0.200987	2.18757
ZIC1	BAG5	0.733636	2.66382	3.616	5.71957	2.87941	0.0187941	2.18728
BACH2	TUT1	0.337563	1.84639	5.03519	5.71957	4.02103	0.0302103	2.18047
FOXD2	LRRN4CL	-0.223699	4.67979	3.89462	5.71957	3.59843	0.0259843	2.18043
MAFF	RPP30	-0.484488	3.50182	3.96266	5.71957	2.93214	0.0193214	2.17847
SIX2	KCNMB2	0.333871	3.14432	4.20247	0.464867	5.90301	0.179608	2.17439
HOXA7	NLRP10	-0.33024	2.78701	3.3316	3.70647	1.1626	0.164161	2.16913
FOXF2	SCARA5	0.411246	4.48359	5.30422	5.71957	2.53132	0.0153132	2.16833
ZIC4	KCNMB2	0.176599	4.34749	4.20247	5.71957	3.96163	0.0296163	2.1652
SIX1	GPR132	0.68337	2.092	5.23882	5.71957	2.80199	0.0180199	2.16288
NRL	NFASC	-0.351033	4.66716	2.21384	1.14619	2.81545	0.18435	2.15771
SIX2	GGT7	0.129856	3.14432	3.83068	5.71957	5.43503	0.0443503	2.15639
HOXD3	RAD17	0.622955	3.51126	3.43986	5.71957	2.7929	0.017929	2.15495
HOXA11	EYA4	0.873816	4.03405	2.56215	1.42726	3.01402	0.0554385	2.15391
FOSL1	TMEM159	-0.595625	1.31107	3.82116	5.71957	4.08605	0.0308605	2.15211
AR	SFXN4	0.462409	3.1561	4.39944	5.71957	2.97172	0.0197172	2.15176
IRF1	GRIA3	-0.201314	2.65145	1.11582	5.71957	8.45757	0.0745757	2.14862
FOXL1	MRAS	-0.370433	4.70318	2.62526	2.07819	5.26638	0.0428698	2.14596
CEBPA	ABCA5	0.413477	4.64148	2.80556	5.71957	3.18526	0.0218526	2.14357
HOXC6	GLIS1	-0.257715	2.69343	3.24356	1.2389	5.83736	0.130925	2.13178
HOXA6	RCAN2	0.290198	3.43122	1.07462	5.71957	6.41472	0.0541472	2.12576
TCF7L1	HSD17B7	0.442534	2.50427	5.2175	5.71957	3.08305	0.0208305	2.1239
CEBPA	SLC25A33	0.419614	4.64148	4.92378	5.71957	2.52567	0.0152567	2.11351
SIX1	ZNF449	-0.574959	2.092	4.89096	5.71957	3.05535	0.0205535	2.11302
NRL	ITGA2	-0.320322	4.66716	2.15542	5.71957	3.92136	0.0292136	2.11134
ZIC1	ZNF273	0.722097	2.66382	3.21957	5.71957	2.99195	0.0199195	2.11103
NRL	C11orf71	0.55516	4.66716	5.23935	5.71957	2.22285	0.0122285	2.11056
FOSB	TMEM200B	0.526203	1.54464	5.15764	0.915041	5.00666	0.109774	2.10823
FOSB	GPER1	0.290478	1.54464	5.05579	5.71957	4.56068	0.0356068	2.10695
BACH2	BAG5	0.573145	1.84639	3.616	5.71957	3.64133	0.0264133	2.10506
MAF	GNG11	-0.608328	1.43172	3.51232	0.920938	5.21472	0.143262	2.10467
TEAD4	ENTPD1	0.662584	4.0781	5.09758	3.3199	2.196	0.0209488	2.10367
FOSB	NLRP10	-0.151173	1.54464	3.3316	4.14193	1.03854	0.628592	2.10352
ZIC4	ARHGEF37	-0.219009	4.34749	5.18062	5.71957	3.27499	0.0227499	2.10201
THRB	SBSN	0.826785	3.79106	4.16488	5.71957	2.24939	0.0124939	2.09837
MAFB	TSPAN2	-0.445058	3.25379	4.45487	0.558265	3.59748	0.161875	2.09729
RXRB	CCDC144NL	0.410692	4.1993	5.13944	5.71957	2.59444	0.0159444	2.09712
HOXA11	PIGT	0.678723	4.03405	3.16738	5.71957	2.61564	0.0161564	2.09613
BACH2	TIMM50	0.570075	1.84639	4.45279	5.71957	3.34033	0.0234033	2.09564
NRL	SLC15A3	0.696969	4.66716	4.57517	5.71957	2.14674	0.0114674	2.09546
FOXP2	EN1	-0.295762	4.37716	3.4839	5.71957	3.39033	0.0239033	2.09056
KLF11	CRMP1	-0.397871	4.31139	5.08021	5.71957	2.60783	0.0160783	2.08989
HOXC11	PRR16	-0.43626	4.46642	4.56681	5.71957	2.58671	0.0158671	2.08895
AR	HOXA10	0.833493	3.1561	1.34282	0.73719	1.7918	0.447267	2.08693
NRL	USF2	0.801113	4.66716	2.60371	5.71957	2.49709	0.0149709	2.08154
HOXA7	SLC24A3	0.208086	2.78701	2.93984	5.71957	5.14404	0.0414404	2.07872
FOXO6	LDLRAD2	0.784626	4.72486	5.17922	5.71957	1.9637	0.00963697	2.07823
ETV2	SIX1	0.612281	4.71737	2.54692	5.71957	2.77753	0.0177753	2.07732
ZIC4	MXRA5	-0.246475	4.34749	2.30101	0.956004	5.66799	0.15545	2.07687
ZIC1	SERPINE3	0.326406	2.66382	5.29533	5.71957	3.35034	0.0235034	2.07367
MAFF	CDC42EP4	0.479759	3.50182	3.94271	5.71957	2.89177	0.0189177	2.07256
ZIC1	ITPKB	0.301519	2.66382	4.99045	5.71957	3.54638	0.0254638	2.0703
SIX2	ARHGEF37	-0.394969	3.14432	5.18062	5.71957	2.92333	0.0192333	2.06904
ZIC1	SNRNP35	0.717105	2.66382	4.73899	5.71957	2.5604	0.015604	2.06862
HOXD3	CCDC112	0.285534	3.51126	4.35727	5.71957	3.41773	0.0241773	2.06465
AR	NOP2	-0.383288	3.1561	4.59559	5.71957	3.0933	0.020933	2.05889
MAFB	SSH1	-0.32035	3.25379	3.10919	2.23345	3.64272	0.0779377	2.05499
MAF	ATP7B	0.547596	1.43172	4.92416	3.32293	2.61634	0.0611664	2.05295
RUNX1	OPHN1	0.348043	2.93158	3.09028	5.71957	3.91054	0.0291054	2.05261
ZIC1	BST1	0.780753	2.66382	1.00607	5.71957	4.67036	0.0367036	2.05149
SIX2	GPR1	-0.2517	3.14432	1.65614	0.892029	5.30237	0.330602	2.04957
NRL	DNAJC7	0.728075	4.66716	2.76038	5.71957	2.51747	0.0151747	2.0495
CEBPG	MYNN	0.636133	3.13378	4.22284	5.71957	2.62209	0.0162209	2.04789
HOXB5	TRPM3	0.105323	3.33933	2.23766	5.71957	7.2576	0.062576	2.04429
HOXA3	EPGN	-0.420232	1.61208	2.14423	5.71957	5.48284	0.0448284	2.04206
AR	COLQ	-0.175071	3.1561	3.94964	0.449042	11.6921	0.178119	2.04085
FOS	RPP21	0.677426	2.29216	4.77877	5.71957	2.74824	0.0174824	2.03912
NRL	LINC00346	0.926674	4.66716	4.81882	5.71957	1.89893	0.00898933	2.0348
FOSL1	GPSM1	-0.427606	1.31107	4.64677	5.71957	4.22887	0.0322887	2.0345
ZIC4	FAM117A	0.513107	4.34749	5.01393	5.04863	2.46111	0.0146208	2.03189
MAFB	ZFPM1	0.542899	3.25379	4.24427	0.468084	7.33159	0.0789371	2.03102
FOS	HRCT1	0.357669	2.29216	4.73701	5.71957	3.55882	0.0255882	2.02274
IRF1	GGT7	0.677367	2.65145	3.83068	5.71957	2.82091	0.0182091	2.02126
JUNB	RPP30	-0.586338	2.1397	3.96266	5.71957	3.2086	0.022086	2.01504
MAFK	BCL2L11	0.849964	2.45727	4.36836	5.71957	2.52603	0.0152603	2.01159
TCF7L1	ZFP69B	0.416705	2.50427	5.20483	5.71957	3.09325	0.0209324	2.01147
HOXB5	LDLRAD2	0.831661	3.33933	5.17922	2.92718	2.73756	0.0174344	2.0095
HEY2	NTRK2	0.616323	4.53593	1.04806	1.59783	2.00717	0.213815	2.00914
SIX2	FRMPD4	-0.181223	3.14432	0.280863	5.71957	15.3234	0.143234	2.00908
HOXA7	GLIS1	-0.143291	2.78701	3.24356	1.52747	6.32081	0.160522	2.00752
MAFB	CDK15	-0.438782	3.25379	4.86602	1.20503	1.67919	0.14236	2.00123
SIX1	RELB	0.881085	2.092	5.1179	5.71957	2.48903	0.0148903	1.99972
MAFK	ADO	-0.513905	2.45727	4.06062	5.71957	3.15816	0.0215816	1.99899
FOXF2	HOXB5	0.609472	4.48359	3.66539	5.71957	2.43342	0.0143342	1.99826
NRL	TBC1D22A	0.520168	4.66716	3.34443	5.71957	2.63339	0.0163339	1.99751
SIX1	ZNF212	0.758685	2.092	4.6963	5.71957	2.71863	0.0171863	1.99193
SIX2	RBP5	0.531791	3.14432	5.16861	5.71957	2.56415	0.0156415	1.98256
FOXC2	BIN3	0.499284	1.97151	4.21164	5.71957	3.43332	0.0243331	1.98094
IRF1	TNNC2	0.6528	2.65145	5.20933	1.61659	3.3275	0.0408119	1.97947
FOXD2	C2orf88	-0.181517	4.67979	4.47429	5.71957	3.55825	0.0255825	1.97884
HOXD9	GRIA3	-0.260744	4.42625	1.11582	5.71957	5.70198	0.0470198	1.97477
SIX2	ZNF71	-0.569058	3.14432	5.14849	5.71957	2.49741	0.0149741	1.97041
MAFK	ASAP2	-0.412867	2.45727	1.96285	5.71957	4.68654	0.0368654	1.96782
HOXA7	RCAN2	0.140094	2.78701	1.07462	5.71957	9.56024	0.0856024	1.96396
BACH2	FNBP1L	0.491118	1.84639	2.81019	5.71957	4.20395	0.0320395	1.96315
ZIC4	PPP4R4	0.115138	4.34749	3.95545	3.16569	6.11247	0.0512353	1.96294
CEBPG	SLC18A2	-0.593897	3.13378	5.26339	5.71957	2.43727	0.0143727	1.96268
FOXC2	GMNC	0.171553	1.97151	5.13951	0.698709	7.70565	0.209703	1.96258
FOSL1	MRAS	-0.371142	1.31107	2.62526	5.71957	5.70511	0.0470511	1.96126
MAFB	C17orf97	0.299758	3.25379	4.45694	5.71957	3.34994	0.0234994	1.95729
MAF	SEC31B	0.543965	1.43172	4.98563	1.07357	5.96258	0.0787011	1.95611
TCF7L1	HTR7	0.420553	2.50427	4.13194	4.48278	1.59804	0.0625351	1.94947
AR	RPP21	0.656229	3.1561	4.77877	5.71957	2.42183	0.0142183	1.9493
CEBPA	PPL	0.819367	4.64148	3.28229	5.71957	2.22598	0.0122598	1.94839
HOXB6	ZNF212	0.827658	2.72773	4.6963	5.71957	2.36085	0.0136085	1.94829
BACH2	HEPH	-0.176799	1.84639	2.63503	5.71957	6.80451	0.0580451	1.94319
BACH2	PCDHGA4	0.701526	1.84639	5.12358	5.71957	2.81193	0.0181193	1.93398
CTCF	LRRC4C	0.518804	2.22212	3.6248	5.71957	3.3859	0.023859	1.93083
HOXA13	LDLRAD2	0.963187	4.73616	5.17922	5.71957	1.79488	0.00794878	1.92797
SIX2	RELB	0.457099	3.14432	5.1179	5.71957	2.69756	0.0169756	1.92658
AR	LDB3	0.61594	3.1561	3.8427	1.63301	1.13711	0.13887	1.92631
FOXC1	SYTL4	0.840968	0.921288	4.8156	5.71957	3.5433	0.025433	1.92307
MXD4	L3HYPDH	-0.484384	2.14241	3.1351	5.71957	3.75294	0.0275294	1.92254
MAFK	TMEM200A	-0.285303	2.45727	0.449654	5.71957	10.8302	0.0983023	1.91957
AR	TMEM229B	0.557373	3.1561	5.28979	1.35684	2.96328	0.0512383	1.91703
NRL	BTBD3	-0.476301	4.66716	3.0769	5.80975	1.29245	0.0372702	1.91417
HOXC4	ZNF212	0.485189	4.26209	4.6963	5.71957	2.42219	0.0142219	1.91346
RFX1	ACKR3	-0.295298	4.29055	3.43114	5.71957	3.31544	0.0231544	1.90876
ZIC4	OPA3	0.439185	4.34749	3.96438	5.71957	2.65751	0.0165751	1.90702
CEBPA	SLC14A2	-0.245397	4.64148	4.89875	5.71957	2.99298	0.0199298	1.90362
ATF5	UHMK1	-0.459096	3.1891	3.00477	5.71957	3.29545	0.0229545	1.9034
NRL	CCNO	0.442143	4.66716	5.31167	3.62006	2.74322	0.0174676	1.90133
AR	TBC1D22A	0.780405	3.1561	3.34443	5.71957	2.56982	0.0156982	1.90069
FOS	SYDE2	0.652911	2.29216	3.80477	5.71957	2.96544	0.0196544	1.89819
HOXC10	SLC18A2	-0.612509	3.72429	5.26339	5.71957	2.23537	0.0123537	1.89641
ZIC4	FAM210B	0.787532	4.34749	2.9928	5.71957	2.36703	0.0136703	1.89641
HOXA11	GLE1	0.947694	4.03405	4.84081	5.71957	1.92842	0.00928424	1.89513
HEY2	HEY2	1	4.53593	5.04171	0.440478	3.97952	0.0471992	1.89205
BACH2	VWA3B	0.566038	1.84639	5.31968	5.71957	2.98918	0.0198918	1.8908
HOXD9	RFX2	0.719799	4.42625	2.44322	5.71957	2.61684	0.0161684	1.88373
FOXD2	LRGUK	0.515851	4.67979	4.60981	5.71957	2.29129	0.0129129	1.88322
FOXF2	ZNF674	0.659295	4.48359	5.01087	5.71957	2.07233	0.0107233	1.88264
CEBPA	GHR	0.37123	4.64148	0.474231	5.71957	6.86578	0.0586578	1.88221
CEBPA	KCNE1	0.864639	4.64148	5.15119	0.698658	1.98403	0.0656028	1.87989
BACH2	LINC00346	0.514833	1.84639	4.81882	5.71957	3.22473	0.0222473	1.8796
TCF7L2	ITM2C	0.797153	2.23722	4.06552	5.71957	2.68539	0.0168539	1.87688
FOXL1	SYTL4	0.608819	4.70318	4.8156	5.71957	2.12165	0.0112165	1.87682
HOXD3	EPB41L4B	0.48382	3.51126	5.27805	0.426296	6.54591	0.0749734	1.8759
KLF10	CRMP1	-0.448094	2.58326	5.08021	5.71957	2.91308	0.0191308	1.87442
AR	DOK4	0.540291	3.1561	4.43599	3.21003	2.12376	0.0362969	1.87177
FOXC2	PRRC2C	0.496443	1.97151	4.49287	0.833481	6.91658	0.0737516	1.8696
HOXA6	EYA1	0.88634	3.43122	3.59611	0.901813	1.84173	0.102882	1.8688
NRL	RIPK3	-0.559419	4.66716	4.30736	5.71957	2.27593	0.0127593	1.86788
HOXB5	ENKUR	0.588542	3.33933	4.41428	0.912764	4.20545	0.0559734	1.86402
AR	HOXA7	0.336518	3.1561	3.16578	2.94446	1.60759	0.11661	1.85591
MAFB	TMEM123	0.664166	3.25379	3.20815	3.11955	3.46586	0.0247234	1.85324
HOXB5	IGF1	0.244353	3.33933	2.97808	5.71957	4.18424	0.0318424	1.85182
CEBPD	BCL2L14	-0.415076	2.88805	4.73212	3.53844	1.33516	0.0689842	1.84877
FOXP2	RCAN2	0.149864	4.37716	1.07462	5.71957	7.28535	0.0628535	1.84624
TCF7L1	SH2B3	0.715221	2.50427	3.13027	0.373555	9.25186	0.095122	1.84318
HOXA3	NLRP10	-0.573264	1.61208	3.3316	3.01563	1.25864	0.157661	1.84246
IRF2	HSPB6	0.282335	3.28882	2.76405	5.71957	4.07495	0.0307495	1.8394
NRL	SLC25A20	0.879687	4.66716	4.97149	5.71957	1.8507	0.00850704	1.838
SIX1	ZNF593	0.864702	2.092	4.73113	5.71957	2.49957	0.0149957	1.8348
CEBPA	HSPA12A	-0.297491	4.64148	4.06574	1.68925	4.91129	0.0393639	1.83339
CEBPD	MARK1	0.660808	2.88805	2.99418	0.933074	4.8469	0.0709264	1.83293
BACH2	TACR1	0.538917	1.84639	5.18165	0.464636	5.10376	0.149751	1.83099
HOXB5	HOXB5	1	3.33933	3.66539	0.534124	5.20553	0.0537382	1.82882
RFX1	HOXB5	0.742238	4.29055	3.66539	5.71957	2.22874	0.0122874	1.82834
JUN	RPP30	-0.531659	2.82703	3.96266	5.71957	2.86944	0.0186944	1.82736
HOXC11	GRIA3	-0.231414	4.46642	1.11582	5.71957	5.78592	0.0478592	1.82661
HOXD3	GMNC	0.164105	3.51126	5.13951	0.662109	6.30331	0.147674	1.82519
GABPA	SBSN	0.421711	3.32931	4.16488	5.71957	2.88648	0.0188648	1.82118
AR	ZNF182	0.107735	3.1561	5.0987	5.71957	4.81447	0.0381447	1.82101
TCF7L2	HTRA3	0.669263	2.23722	4.09055	5.71957	2.83203	0.0183203	1.81753
TCF7L1	DNAJC30	-0.396197	2.50427	4.70497	5.71957	3.15519	0.0215519	1.81561
SIX2	GPR39	0.744413	3.14432	2.26154	0.92335	2.12154	0.175042	1.81511
HOXD9	ADPRH	0.343403	4.42625	5.15611	5.71957	2.57179	0.0157179	1.812
CEBPA	RGS20	0.526366	4.64148	1.3517	0.762143	8.34933	0.0862148	1.81173
TCF7L2	LINC00346	0.670423	2.23722	4.81882	5.71957	2.65131	0.0165131	1.80988
CEBPB	LHFPL5	-0.112382	3.0906	4.96917	5.71957	4.80947	0.0380947	1.80863
RFX2	L3HYPDH	-0.343852	1.69054	3.1351	5.71957	4.69366	0.0369366	1.8071
CEBPA	TSHR	0.473198	4.64148	3.79067	2.02995	3.79807	0.0281343	1.80592
ZIC4	PRRX2	0.361769	4.34749	1.02148	0.80265	6.57825	0.212574	1.8032
AR	VEGFC	-0.273497	3.1561	2.79449	1.31126	2.33035	0.244506	1.80221
HOXD4	MAP1LC3B2	0.125942	4.67202	5.09425	5.71957	3.77875	0.0277875	1.80019
PRRX2	EMX2	-0.547061	0.372399	3.4835	2.87579	3.3976	0.259534	1.79964
IRF1	INIP	0.8291	2.65145	4.70218	5.71957	2.31368	0.0131368	1.797
AR	KIF27	-0.312514	3.1561	3.21225	0.464394	6.48885	0.187959	1.79451
RXRB	PPP1R14C	0.614692	4.1993	3.58861	1.40997	2.29429	0.0598605	1.79373
FOS	HOXB5	0.572648	2.29216	3.66539	5.71957	3.10116	0.0210116	1.79308
SIX2	SYTL3	0.50668	3.14432	4.03411	0.817073	1.5923	0.214359	1.79241
CTCF	C3orf62	-0.196805	2.22212	5.0676	5.71957	4.29329	0.0329329	1.79222
MAF	C17orf97	0.344899	1.43172	4.45694	5.71957	4.30366	0.0330366	1.78972
ZIC4	HSPA12A	-0.11946	4.34749	4.06574	5.71957	4.38079	0.0338079	1.78869
AR	ELMSAN1	0.483879	3.1561	4.18512	1.08515	3.82841	0.0673483	1.78826
MAFK	MRPL54	0.807671	2.45727	3.40974	5.71957	2.7051	0.017051	1.78528
AR	MRC2	-0.517571	3.1561	3.7078	2.40576	2.06042	0.0594331	1.78432
DBP	CDK15	-0.3522	3.91504	4.86602	0.830035	4.75156	0.0673131	1.78128
AR	CYP19A1	0.68889	3.1561	5.31866	0.456113	4.48446	0.0752331	1.77949
MAFF	TSPAN11	-0.195824	3.50182	4.00894	5.71957	3.90087	0.0290087	1.77927
NRL	RNF114	0.877778	4.66716	4.42132	0.485151	4.32001	0.046863	1.77902
TCF7L2	ENTPD1	0.421725	2.23722	5.09758	5.71957	3.09036	0.0209036	1.77703
AR	KLHL36	-0.397741	3.1561	2.97188	5.71957	3.42796	0.0242796	1.77592
FOXC2	SRRT	0.348435	1.97151	4.50303	5.71957	3.70679	0.0270679	1.77516
DDIT3	KLHL2	0.659336	1.10479	4.71556	5.71957	3.54687	0.0254687	1.77474
PKNOX2	ACAN	0.351779	3.80394	1.281	5.71957	4.78067	0.0378067	1.77205
FOXC1	EMX2	-0.511408	0.921288	3.4835	1.88188	4.26751	0.134301	1.77021
IRF1	NFASC	-0.418625	2.65145	2.21384	2.33465	2.16426	0.142478	1.76902
NRL	RAD50	-0.539139	4.66716	2.37508	5.71957	2.82789	0.0182789	1.76689
FOXD2	NOS1AP	0.909698	4.67979	5.22321	1.81925	2.63955	0.0165189	1.76386
MAF	FOXD1	-0.493434	1.43172	3.76018	0.468491	4.71823	0.29988	1.76086
CEBPA	EMB	0.341088	4.64148	4.66755	5.71957	2.60111	0.0160111	1.76017
AR	DBT	0.390602	3.1561	4.28788	5.71957	2.96247	0.0196247	1.75772
ZIC1	FAM210B	0.715002	2.66382	2.9928	5.71957	2.87403	0.0187403	1.75598
NRL	HTRA3	0.145344	4.66716	4.09055	5.71957	3.86134	0.0286134	1.75348
BACH2	RIPK3	-0.230298	1.84639	4.30736	5.71957	4.61981	0.0361981	1.75186
HOXC10	CCDC149	0.487082	3.72429	4.35757	5.71957	2.53067	0.0153067	1.75134
HEY2	PPARGC1A	0.136006	4.53593	4.96382	5.71957	3.70127	0.0270127	1.75115
ATF4	FAM151B	0.255661	3.56251	4.62831	5.71957	3.24096	0.0224096	1.7511
RXRB	PEG10	0.395709	4.1993	5.25962	5.71957	2.43672	0.0143672	1.75004
SIX2	RPP30	-0.297873	3.14432	3.96266	5.71957	3.41427	0.0241427	1.74982
NRL	NBAS	0.602163	4.66716	4.38932	3.51123	1.29997	0.0310544	1.74856
FOXD2	CCDC34	0.480104	4.67979	4.34614	5.71957	2.33846	0.0133846	1.74809
HOXB5	NOA1	0.578358	3.33933	4.35178	5.71957	2.47086	0.0147086	1.74706
CEBPA	RBKS	-0.426327	4.64148	4.785	5.71957	2.36342	0.0136342	1.74507
ZIC4	SCRG1	0.505369	4.34749	0.222455	5.71957	8.40674	0.0740674	1.74063
SIX1	ZNF710	-0.651043	2.092	4.79688	5.71957	2.71472	0.0171472	1.73944
MAFK	RBM23	0.660806	2.45727	4.63534	5.71957	2.56947	0.0156947	1.73607
NRL	SOCS3	0.466496	4.66716	4.10462	5.71957	2.40908	0.0140908	1.7351
TCF7L1	CYTH3	0.210151	2.50427	3.57415	5.71957	4.54422	0.0354422	1.73273
TCF7L2	NPTXR	0.813581	2.23722	4.29242	5.71957	2.52979	0.0152979	1.72939
SIX2	GLE1	0.686428	3.14432	4.84081	5.71957	2.27232	0.0127232	1.72771
FOXC2	ADAR	0.494697	1.97151	2.83377	5.71957	3.84313	0.0284313	1.72722
ZIC1	SUSD5	0.304679	2.66382	1.74906	5.71957	5.1391	0.041391	1.72706
FOXL1	SMIM3	-0.15168	4.70318	1.86076	5.71957	5.29103	0.0429103	1.72376
HOXB5	LINC00346	0.648827	3.33933	4.81882	5.71957	2.27034	0.0127034	1.72229
SIX2	PFDN4	0.445407	3.14432	3.94535	5.71957	2.88709	0.0188709	1.72181
JUN	RIMS3	0.924634	2.82703	4.89285	5.71957	2.10909	0.0110909	1.71115
JUN	DIRAS1	0.906454	2.82703	4.00059	3.85998	1.30168	0.0331926	1.70974
ZIC4	ZNF667	-0.253847	4.34749	4.29065	5.71957	3.06086	0.0206086	1.7084
MAF	AKR1C2	0.71472	1.43172	3.2745	0.957219	3.41947	0.155341	1.70371
CEBPA	CCDC12	0.533257	4.64148	4.14349	5.71957	2.27597	0.0127597	1.70344
ZIC1	NAA60	0.856131	2.66382	4.58468	5.71957	2.25979	0.0125979	1.70248
NRL	IGF1	0.432669	4.66716	2.97808	5.71957	2.77685	0.0177685	1.69712
HOXB8	FMO3	0.448205	4.01038	4.12174	0.473505	4.33396	0.111603	1.69679
NRL	BBC3	0.859246	4.66716	4.71466	1.16764	2.40332	0.0319729	1.69638
HOXD3	WDYHV1	0.496402	3.51126	4.90799	2.49027	2.08681	0.0381562	1.69628
SIX2	DPYSL3	-0.256481	3.14432	4.53377	5.71957	3.39124	0.0239141	1.69597
CEBPA	C12orf43	-0.436306	4.64148	4.69044	5.71957	2.33448	0.0133448	1.6925
IRF1	YIPF6	0.582786	2.65145	4.09858	5.71957	2.71332	0.0171332	1.68395
HOXD8	HAPLN3	-0.41827	4.16452	1.96721	0.844928	7.38602	0.0785304	1.67935
CEBPA	TMEM62	-0.463923	4.64148	4.63149	5.71957	2.28622	0.0128622	1.67733
JUND	CYP27C1	-0.428815	2.82398	4.14957	5.71957	2.96651	0.0196651	1.67664
RXRB	ARHGAP28	0.467856	4.1993	3.198	5.71957	2.71672	0.0171672	1.676
HOXC6	ZNF354C	0.575776	2.69343	5.04628	1.93198	2.35994	0.0468267	1.67081
BACH2	CHCHD4	0.716744	1.84639	5.16365	0.885611	3.90802	0.0706332	1.67053
FOXO6	IGF1	0.476136	4.72486	2.97808	5.71957	2.64669	0.0164669	1.67006
HOXB5	ITM2C	0.882867	3.33933	4.06552	5.71957	2.13805	0.0113805	1.66807
RXRB	RPP30	-0.220916	4.1993	3.96266	5.71957	3.3591	0.023591	1.6662
MAF	TMEM123	0.581352	1.43172	3.20815	5.71957	3.83674	0.0283674	1.66226
FOXP2	SLC24A3	0.858542	4.37716	2.93984	5.71957	2.19599	0.0119599	1.65958
SIX2	ICAM1	0.75085	3.14432	4.8834	5.71957	2.16241	0.0116241	1.65753
MAFK	IL7R	0.668675	2.45727	4.32565	0.949865	1.92661	0.127407	1.65717
AR	CCZ1	0.481386	3.1561	3.42407	5.71957	2.91217	0.0191217	1.6569
NFIX	IGF1	0.576915	2.11506	2.97808	5.71957	3.36709	0.0236709	1.65654
BACH2	SOCS3	0.33664	1.84639	4.10462	5.71957	3.90538	0.0290538	1.65574
ZIC1	TMEM200B	0.744898	2.66382	5.15764	0.635409	2.97383	0.0854945	1.65333
TCF7L1	TRIM22	0.286298	2.50427	0.68569	5.71957	8.17743	0.0717743	1.65035
NRL	WDR1	-0.626639	4.66716	1.84215	5.71957	2.86712	0.0186712	1.6496
MAFB	ENTPD5	-0.589768	3.25379	4.73686	5.71957	2.34847	0.0134847	1.64645
CTCF	ARHGEF37	-0.512614	2.22212	5.18062	5.71957	2.76336	0.0176336	1.64468
BACH2	RPP30	-0.223666	1.84639	3.96266	5.71957	4.72123	0.0372123	1.64444
JUN	ZNF273	0.739805	2.82703	3.21957	5.71957	2.62566	0.0162566	1.64391
HOXA11	EYA2	0.620843	4.03405	0.467963	5.71957	5.46736	0.0446736	1.63729
AR	KIAA1522	0.77119	3.1561	5.0488	0.65299	3.76299	0.054187	1.6362
CEBPA	WDPCP	-0.266541	4.64148	2.48597	5.71957	3.58957	0.0258957	1.63512
ZIC1	C14orf28	-0.176158	2.66382	5.04118	5.71957	4.00761	0.0300761	1.63083
FOXP2	GYG1	0.269387	4.37716	3.79822	5.71957	3.07087	0.0207087	1.62902
RFX1	GNPDA1	0.580084	4.29055	3.61666	5.71957	2.34743	0.0134743	1.62845
NRL	ZBTB10	0.567987	4.66716	4.89195	3.32676	1.91707	0.0196867	1.62819
AR	ABCB6	-0.424576	3.1561	3.66837	5.71957	2.95777	0.0195777	1.62805
BACH2	ELOF1	0.464098	1.84639	4.95782	5.71957	3.13562	0.0213562	1.62718
IRF1	EFHD2	0.61986	2.65145	3.93447	5.71957	2.65509	0.0165509	1.62528
AR	FANCC	0.418488	3.1561	4.07037	2.43048	1.37031	0.0906919	1.62386
HOXC5	TLCD2	0.783395	4.67699	3.76447	4.02332	2.27909	0.0128125	1.62044
FOXC1	TXNDC16	0.642858	0.921288	4.93187	0.849265	5.46264	0.119423	1.61829
NRL	AKNA	0.617744	4.66716	3.02507	0.723188	4.31509	0.0594149	1.61708
BACH2	ZNF226	0.322292	1.84639	3.98736	5.71957	3.98719	0.0298719	1.61641
AR	IRAK3	0.598413	3.1561	4.1127	0.409466	6.88044	0.0736862	1.6125
RXRB	CELF6	0.518998	4.1993	4.55541	5.71957	2.25666	0.0125666	1.61034
ZIC1	SPIRE2	0.646501	2.66382	5.20044	0.903908	4.13235	0.0480863	1.60864
ERG	HAUS3	0.488918	4.38615	4.93992	5.71957	2.20429	0.0120429	1.60843
HOXC10	CEP290	0.753785	3.72429	1.82132	5.71957	2.89686	0.0189686	1.60695
MAF	GABRB1	0.418174	1.43172	5.29953	5.71957	3.51526	0.0251526	1.60456
ARNT	HHIPL1	0.560026	2.12001	3.6085	5.71957	3.10722	0.0210722	1.60441
JDP2	SUSD5	0.715795	0.838953	1.74906	5.71957	5.68804	0.0468804	1.60194
FOXF2	HTRA3	0.370241	4.48359	4.09055	5.71957	2.59082	0.0159082	1.60071
HEY2	CAMSAP1	0.300526	4.53593	4.51685	5.71957	2.68877	0.0168894	1.59924
HOXD3	SRPX2	-0.410173	3.51126	2.71603	5.71957	3.21913	0.0221913	1.59827
SIX2	IFT57	0.559066	3.14432	1.83918	5.71957	3.48044	0.0248044	1.59639
AR	ARRDC2	0.56888	3.1561	4.71386	1.07374	2.00939	0.0873282	1.59465
CEBPA	LANCL3	0.278963	4.64148	4.95087	5.71957	2.64452	0.0164452	1.59453
MAF	SLC40A1	0.607576	1.43172	5.09548	5.71957	3.0566	0.020566	1.59366
FOSL1	ASNSD1	0.632495	1.31107	4.51209	5.71957	3.27363	0.0227363	1.59285
FOSB	FILIP1	0.71522	1.54464	5.05968	0.453201	6.28121	0.100063	1.59219
NFIC	ZNF354C	0.628347	4.28693	5.04628	3.45995	2.40266	0.0140895	1.59211
CEBPG	RYR1	0.703684	3.13378	5.32154	5.71957	2.11743	0.0111743	1.5881
LEF1	LANCL3	0.572671	4.7403	4.95087	5.71957	2.02153	0.0102153	1.58741
TCF7L1	ERCC6	-0.13527	2.50427	1.53773	5.71957	7.8152	0.068152	1.58689
NR4A2	CYP4X1	0.305875	3.53918	5.09332	5.71957	2.79563	0.0179563	1.58309
CEBPG	PLEKHG1	0.752692	3.13378	4.01242	5.71957	2.28166	0.0128166	1.583
NRL	ZNF684	0.496055	4.66716	5.13667	0.787797	3.98888	0.0423304	1.58191
MAFB	GABRB1	0.346406	3.25379	5.29953	5.71957	2.70842	0.0170842	1.58083
HOXC10	CCDC112	0.834104	3.72429	4.35727	5.71957	2.01383	0.0101383	1.58063
MAF	TMEM200A	-0.151927	1.43172	0.449654	5.71957	17.3107	0.163107	1.57952
ZIC4	ESR1	-0.133066	4.34749	2.69496	5.71957	4.73601	0.0373601	1.57776
NRL	SYTL3	0.446948	4.66716	4.03411	0.876864	2.10717	0.101283	1.5748
MAF	LY6K	-0.534172	1.43172	3.60833	0.74526	6.94678	0.110099	1.57297
AR	ATP6V1C2	-0.216407	3.1561	5.19733	5.71957	3.32726	0.0232726	1.57217
TCF7L1	BEND7	-0.277117	2.50427	2.74941	1.43218	4.39123	0.13099	1.57182
TEAD4	GPER1	0.518152	4.0781	5.05579	5.71957	2.17874	0.0117874	1.56924
ZIC4	PPP2R3C	0.473276	4.34749	2.23221	5.71957	2.99412	0.0199412	1.56846
BACH2	AAMDC	0.505906	1.84639	1.56586	5.71957	4.85593	0.0385593	1.56644
HOXA11	GLIS1	-0.212106	4.03405	3.24356	1.14371	3.57271	0.138001	1.56499
JUNB	SERPINE3	0.669744	2.1397	5.29533	5.71957	2.46249	0.0146249	1.56309
FOS	TMEM200B	0.846586	2.29216	5.15764	0.886925	3.66146	0.0480282	1.56101
BACH2	FBXO27	0.518361	1.84639	4.55723	0.819591	2.97271	0.146749	1.55948
TCF7L2	TNNC2	0.458548	2.23722	5.20933	1.23719	4.18631	0.056234	1.55648
BACH2	ZSCAN21	0.31358	1.84639	4.9033	5.71957	3.63412	0.0263412	1.55439
TEAD4	RAD9A	0.585169	4.0781	3.4428	5.71957	2.38558	0.0138558	1.55324
TCF7L1	MRAS	-0.417443	2.50427	2.62526	0.880908	7.44379	0.0863081	1.5532
BACH2	PLA2G6	-0.233418	1.84639	4.94089	5.71957	4.10237	0.0310236	1.55008
TCF7L2	GRIA3	-0.151872	2.23722	1.11582	5.71957	8.96686	0.0796686	1.54907
RFX1	C10orf88	-0.530267	4.29055	4.38744	5.71957	2.22039	0.0122039	1.54707
ZIC4	CYS1	0.50184	4.34749	5.26042	5.71957	2.11384	0.0111384	1.54554
HOXD3	MBTPS2	0.415137	3.51126	4.18277	5.71957	2.6635	0.016635	1.54511
NRL	SKP1	0.419045	4.66716	3.97748	5.71957	2.42916	0.0142916	1.54462
TCF7L2	LDB3	0.886188	2.23722	3.8427	1.50624	1.32148	0.101489	1.53902
HOXB5	SLC15A3	0.831102	3.33933	4.57517	5.71957	2.03897	0.0103897	1.5385
BACH2	COL3A1	0.345086	1.84639	2.72078	5.71957	4.47056	0.0347056	1.53841
CEBPA	CDKN1C	0.220606	4.64148	4.5788	5.71957	2.94631	0.0194631	1.53772
AR	SVEP1	0.799315	3.1561	1.58402	0.468399	3.67231	0.223612	1.53702
TCF7L2	ABCB5	0.345088	2.23722	5.33098	5.71957	3.10307	0.0210307	1.53622
RUNX1	RFK	0.62693	2.93158	4.73568	5.71957	2.32625	0.0132625	1.53585
MAFF	GRIA3	-0.167156	3.50182	1.11582	5.71957	6.93082	0.0593082	1.53559
FOXC2	RBPJ	0.514906	1.97151	2.24957	5.71957	3.96308	0.0296308	1.53379
MAFB	ATL2	0.670654	3.25379	3.90185	5.71957	2.34354	0.0134354	1.53337
NRL	C20orf197	-0.377577	4.66716	5.28406	1.40569	3.72602	0.0314338	1.53305
MAFF	OSGIN1	0.486572	3.50182	4.41068	5.71957	2.45284	0.0145284	1.53179
MAFF	CAPRIN2	-0.385138	3.50182	2.1134	5.71957	3.60089	0.0260089	1.52682
AR	PAK2	0.612787	3.1561	4.14021	5.71957	2.39234	0.0139234	1.52551
FOSB	SLC30A7	-0.231806	1.54464	2.18967	5.71957	6.34301	0.05343	1.51975
ATF2	KLHL2	0.740491	3.21258	4.71556	5.71957	2.11677	0.0111677	1.51673
JUNB	ZNF273	0.760227	2.1397	3.21957	5.71957	2.8038	0.018038	1.51494
HOXB5	CYP46A1	0.368737	3.33933	5.03075	5.71957	2.62659	0.0162659	1.51371
SIX2	TSPAN11	-0.119868	3.14432	4.00894	5.71957	4.71422	0.0371422	1.51322
ZIC1	SLC17A9	-0.167705	2.66382	4.50033	5.71957	4.16045	0.0316045	1.51199
MYC	STX6	0.466462	2.82788	3.12287	5.71957	3.08207	0.0208207	1.51193
ZIC4	ADAMTS10	0.961025	4.34749	2.87228	0.850754	2.14856	0.0689128	1.51165
TCF7L2	SARDH	0.531539	2.23722	5.26709	5.71957	2.61409	0.0161409	1.51156
JUND	PIGC	0.658254	2.82398	4.20714	5.71957	2.40478	0.0140478	1.51108
NFIX	ZNF414	0.855233	2.11506	4.88509	5.71957	2.29944	0.0129944	1.51015
ZIC1	SCRG1	0.401869	2.66382	0.222455	5.71957	11.0278	0.100278	1.50621
FOSL1	CCDC34	0.627753	1.31107	4.34614	5.71957	3.25794	0.0225794	1.505
HOXB8	ALKBH2	0.628049	4.01038	4.83167	5.71957	2.05278	0.0105278	1.50424
CREM	ERC1	0.773301	3.89421	3.32496	5.71957	2.19589	0.0119589	1.5039
ERG	CCNJ	0.408131	4.38615	5.09535	5.71957	2.26931	0.0126931	1.50274
CEBPG	KCTD18	0.654645	3.13378	4.67563	5.71957	2.22858	0.0122858	1.50214
SIX2	MFN2	-0.318644	3.14432	4.16307	5.71957	3.05861	0.0205861	1.50213
IRF1	ADO	-0.56074	2.65145	4.06062	5.71957	2.64479	0.0164479	1.50211
CEBPB	CYP2R1	0.642322	3.0906	3.50401	1.11528	4.23404	0.0457102	1.50145
AR	KATNB1	-0.23384	3.1561	5.1211	5.71957	3.18233	0.0218233	1.50128
MAFB	ZNF703	0.719369	3.25379	4.19414	1.65187	1.13188	0.0816902	1.49945
HOXA7	BEND7	-0.365816	2.78701	2.74941	1.2951	5.18643	0.0796362	1.49941
SIX2	CDV3	0.609142	3.14432	2.80175	5.71957	2.76587	0.0176587	1.4991
MAFB	LY6K	-0.501778	3.25379	3.60833	0.530688	5.97052	0.0802804	1.49854
BARX1	HOXB5	0.616599	4.72145	3.66539	5.71957	2.14452	0.0114452	1.49802
NRL	FIBIN	-0.223836	4.66716	4.1573	1.33961	3.28038	0.0784119	1.4965
TCF7L1	ZNF300	0.437602	2.50427	4.98957	5.71957	2.74327	0.0174327	1.49562
AR	RNF114	0.576052	3.1561	4.42132	0.93233	3.76942	0.0528797	1.49382
CEBPG	PRR16	-0.33693	3.13378	4.56681	5.71957	2.88	0.0188	1.49326
BACH2	DAPK3	0.577185	1.84639	3.56866	5.71957	3.16717	0.0216717	1.49304
HEY2	EMX2	-0.256713	4.53593	3.4835	1.47606	2.3975	0.104002	1.49292
CEBPG	STARD3	-0.604042	3.13378	4.69807	5.71957	2.28343	0.0128343	1.49067
HOXC4	IGF1	0.210035	4.26209	2.97808	5.71957	3.66486	0.0266486	1.48917
BCL6	NFATC2	0.799322	2.90315	3.50603	5.71957	2.35597	0.0135597	1.48658
FOXL1	TRMT10B	0.220232	4.70318	3.82957	5.71957	3.10588	0.0210588	1.4839
ERG	PRKAB2	-0.350016	4.38615	4.17677	5.71957	2.57178	0.0157178	1.48251
RXRB	MAP1LC3B2	0.241324	4.1993	5.09425	0.860578	3.62137	0.0921451	1.48249
TEAD4	AEN	0.676092	4.0781	4.70509	0.863925	2.94824	0.0448458	1.48181
NFE2L2	PDSS1	-0.38204	2.74024	5.08029	5.71957	2.76288	0.0176288	1.48161
FOXC1	CCDC34	0.42194	0.921288	4.34614	5.71957	4.44254	0.0344254	1.47782
HOXA5	HTRA3	0.90321	1.5395	4.09055	5.71957	2.68904	0.0168904	1.47758
RFX1	ACER3	-0.357199	4.29055	3.00045	5.71957	2.92	0.0192	1.47453
MAF	PAMR1	0.230958	1.43172	1.84617	2.29116	2.86234	0.36796	1.47313
MYC	KLHL2	0.582563	2.82788	4.71556	5.71957	2.38553	0.0138553	1.46858
NRL	OLFML1	0.530978	4.66716	3.9713	0.565309	2.69999	0.0977627	1.46853
IRF1	BARX1	0.118379	2.65145	5.30194	5.71957	4.45743	0.0345743	1.46687
TEAD2	BCL2L14	-0.504377	4.15977	4.73212	3.23723	1.42412	0.032041	1.46659
HOXD4	LRRC4C	0.207281	4.67202	3.6248	5.71957	3.2477	0.022477	1.46564
RFX1	PLEKHG6	-0.564499	4.29055	5.27567	5.71957	2.00174	0.0100174	1.46548
HOXD3	HTR7	0.390897	3.51126	4.13194	0.809092	2.50452	0.127468	1.46489
TEF	ARHGEF37	-0.378004	3.81032	5.18062	5.71957	2.41703	0.0141703	1.46171
NFIX	EFCAB6	-0.205545	2.11506	3.92275	5.71957	4.39784	0.0339784	1.45756
NFIB	PIGM	-0.601249	2.00021	4.64103	5.71957	2.6943	0.016943	1.45729
HOXB5	SYTL4	0.584078	3.33933	4.8156	5.71957	2.21932	0.0121932	1.45372
FOS	GDF5	-0.193769	2.29216	5.12484	5.71957	3.87853	0.0287853	1.45349
ZIC1	TACR1	0.432332	2.66382	5.18165	5.71957	2.62307	0.0162307	1.45312
AR	HSD17B6	0.786301	3.1561	5.09466	0.718388	3.08506	0.0518146	1.45188
MYC	HTR7	0.706644	2.82788	4.13194	1.54216	1.24844	0.0913046	1.45146
HOXB5	RPP30	-0.578934	3.33933	3.96266	5.71957	2.38672	0.0138672	1.4502
NR4A2	FIZ1	0.786224	3.53918	5.22516	5.71957	1.91195	0.00911951	1.44998
TCF7L1	KIF11	0.615191	2.50427	5.04888	5.71957	2.3732	0.013732	1.44983
HOXD3	COL5A3	0.361012	3.51126	1.48803	5.71957	4.19944	0.0319944	1.44952
ATF5	IFIT1	-0.45818	3.1891	5.07867	5.71957	2.41309	0.0141309	1.4473
MYC	PPP1R14C	0.532868	2.82788	3.58861	1.01598	3.39834	0.0774689	1.44639
CEBPA	ANKRD35	0.762213	4.64148	4.21103	0.490004	3.99292	0.0495106	1.44314
ZIC1	CLPB	0.170014	2.66382	4.84473	5.71957	3.92766	0.0292766	1.44303
TCF7L1	ATP6V1C2	-0.207357	2.50427	5.19733	5.71957	3.59417	0.0259417	1.43927
ELF4	BARX1	0.427299	4.3383	5.30194	0.646822	5.23621	0.0431462	1.43625
HOXA5	EPGN	-0.493701	1.5395	2.14423	5.71957	4.44894	0.0344894	1.43028
BACH2	BIN3	0.32646	1.84639	4.21164	5.71957	3.67678	0.0267678	1.42905
HOXC5	ZNF354C	0.480438	4.67699	5.04628	2.23459	2.1243	0.0264848	1.42556
NRL	MLXIPL	0.54183	4.66716	5.30956	5.71957	1.95053	0.00950527	1.42382
DBP	ITGA2	-0.342202	3.91504	2.15542	5.71957	3.47785	0.0247785	1.42332
NFIB	ZNF568	0.783711	2.00021	3.95829	5.71957	2.56396	0.0156396	1.42311
BACH2	LOX	-0.244035	1.84639	3.2	5.71957	4.67915	0.0367915	1.41972
AR	UNG	0.280958	3.1561	4.66035	5.71957	2.9989	0.019989	1.41686
HEY2	SBSPON	0.169079	4.53593	4.33228	2.00024	5.12826	0.0414943	1.4142
SIX1	LINC00346	0.676676	2.092	4.81882	5.71957	2.46832	0.0146832	1.41407
MAFB	ASPN	0.243572	3.25379	5.26719	5.71957	2.98413	0.0198413	1.41367
FOSB	ADAT1	0.50675	1.54464	4.34314	5.71957	3.24233	0.0224233	1.41365
HOXB8	CYP46A1	0.500397	4.01038	5.03075	5.71957	2.14197	0.0114197	1.41242
AR	PTPN23	-0.26696	3.1561	4.59492	5.71957	3.07371	0.0207371	1.4114
MAFB	SLC40A1	0.496477	3.25379	5.09548	5.71957	2.30192	0.0130192	1.41095
MAFF	ASAP2	-0.317998	3.50182	1.96285	5.71957	3.89481	0.0289481	1.40953
BARX1	PTGIS	0.605544	4.72145	2.5639	5.71957	2.39934	0.0139934	1.40767
TCF7L2	L3HYPDH	-0.481908	2.23722	3.1351	5.71957	3.24318	0.0224318	1.40644
SIX2	CCDC34	0.332734	3.14432	4.34614	5.71957	2.87863	0.0187863	1.40643
ZIC4	ABL2	0.285182	4.34749	4.21282	5.71957	2.72661	0.0172661	1.40642
ZIC1	TMEM129	0.765742	2.66382	4.84648	1.66521	3.45423	0.0247236	1.40587
TEF	C14orf39	0.646849	3.81032	5.20684	5.71957	1.97056	0.00970563	1.40383
AR	P2RY11	0.593817	3.1561	5.08454	0.605569	4.81395	0.0504983	1.40281
ATF5	ITGA2	-0.396263	3.1891	2.15542	5.71957	3.54206	0.0254206	1.40278
NRL	ADO	-0.341242	4.66716	4.06062	5.71957	2.50995	0.0150995	1.40184
NRL	PCOLCE	0.536907	4.66716	1.71675	5.71957	2.93829	0.0193829	1.40131
FOXC2	PITPNM1	0.284164	1.97151	5.02222	5.71957	3.49076	0.0249076	1.39919
AR	HTRA1	-0.512348	3.1561	3.85307	1.07886	2.22216	0.0936542	1.3989
ETV3	LRRC4C	0.575378	4.25738	3.6248	5.71957	2.23259	0.0123259	1.39756
HOXD9	FAP	-0.242795	4.42625	2.0051	5.71957	3.90379	0.0290379	1.3971
JUNB	VSTM2L	0.67137	2.1397	4.75495	5.71957	2.4556	0.014556	1.39644
CEBPD	SLC25A33	0.646935	2.88805	4.92378	5.71957	2.20383	0.0120383	1.39595
ZIC1	CYP4X1	0.53123	2.66382	5.09332	5.71957	2.40507	0.0140507	1.39308
FOXL1	LRRC4C	0.155589	4.70318	3.6248	5.71957	3.56864	0.0256864	1.39067
NRL	IL7R	0.348518	4.66716	4.32565	1.0347	2.42574	0.0786932	1.38971
ZIC1	OPHN1	0.676931	2.66382	3.09028	5.71957	2.64344	0.0164344	1.38463
CTCF	OPHN1	0.34112	2.22212	3.09028	5.71957	3.75179	0.0275179	1.38322
TCF7L2	IGF1	0.579099	2.23722	2.97808	5.71957	3.05181	0.0205181	1.38183
AR	PCNT	0.494753	3.1561	3.77806	0.958231	2.89011	0.0845448	1.38127
JUNB	HSPA12A	-0.334809	2.1397	4.06574	5.71957	3.42141	0.0242141	1.38015
IRF1	SOX30	0.137077	2.65145	5.11736	5.71957	4.13411	0.031341	1.37833
MAFF	HTRA3	0.464118	3.50182	4.09055	5.71957	2.46728	0.0146728	1.37657
CEBPA	SLC22A23	0.875407	4.64148	1.60464	5.29022	2.55806	0.0155883	1.3754
TCF7L2	UPP1	-0.298421	2.23722	3.47794	1.41356	4.99575	0.083865	1.37517
HOXB5	KIF27	-0.426284	3.33933	3.21225	5.71957	2.84644	0.0184644	1.37458
FOXC2	PDE10A	0.917044	1.97151	4.26796	0.541927	3.18372	0.103153	1.3733
CEBPG	CCDC144NL	0.199797	3.13378	5.13944	5.71957	3.27616	0.0227616	1.37247
MAFB	MAK	-0.459471	3.25379	4.95168	0.788981	4.63578	0.0506548	1.37155
HOXC4	CCDC97	0.500876	4.26209	4.76657	5.71957	2.11277	0.0111277	1.36829
TEAD4	LRRC7	0.547385	4.0781	5.27655	0.925876	3.17904	0.0394431	1.36747
JDP2	FHAD1	0.680444	0.838953	4.1551	5.71957	3.71397	0.0271397	1.36747
HOXA3	MAP1LC3B2	0.182746	1.61208	5.09425	0.865917	9.18256	0.114461	1.36588
HOXA7	WDYHV1	0.637175	2.78701	4.90799	2.47478	1.71812	0.0367582	1.36221
BACH2	TMEM159	-0.143775	1.84639	3.82116	5.71957	5.36293	0.0436293	1.35752
SIX2	BTN3A2	0.581817	3.14432	4.48263	5.71957	2.27286	0.0127286	1.35694
ZIC1	DNMT3B	0.319938	2.66382	5.22186	4.52229	3.14282	0.0214481	1.35664
HOXD8	PAMR1	0.631794	4.16452	1.84617	1.58572	1.57061	0.112112	1.3563
CEBPG	CCDC12	0.565778	3.13378	4.14349	5.71957	2.3648	0.013648	1.35616
CEBPA	MYOM2	-0.431405	4.64148	5.16164	2.4321	2.8706	0.0187938	1.35612
HOXD9	PIGT	0.767067	4.42625	3.16738	5.71957	2.06631	0.0106631	1.35523
NR1D1	GRIN2A	0.636047	3.5567	5.23601	5.71957	1.99996	0.00999965	1.3549
ZIC1	ZNF414	0.532298	2.66382	4.88509	5.71957	2.41546	0.0141546	1.35454
AR	ZDHHC4	-0.235239	3.1561	4.27197	2.57792	4.59264	0.0360531	1.35383
FOSB	ANKS6	0.178145	1.54464	4.07214	5.71957	5.11828	0.0411828	1.35091
FOXC2	ST3GAL6	-0.129931	1.97151	4.21269	5.71957	5.20435	0.0420435	1.35051
HEY2	ZBTB18	0.556497	4.53593	4.82568	3.17018	1.90875	0.0183203	1.35037
JUN	MAP1LC3B2	0.51965	2.82703	5.09425	0.767885	3.55705	0.0660328	1.34979
SIX1	RPP30	-0.623581	2.092	3.96266	5.71957	2.69329	0.0169329	1.3484
MAFF	PPARGC1A	0.437223	3.50182	4.96382	5.71957	2.33072	0.0133072	1.34819
HOXA6	LINC00346	0.797533	3.43122	4.81882	5.71957	1.92696	0.00926957	1.3472
TEAD4	BARX1	0.252439	4.0781	5.30194	3.94872	3.04703	0.0205009	1.34633
FOSB	RPP30	-0.458096	1.54464	3.96266	5.71957	3.43676	0.0243676	1.34306
HOXB5	FAM167B	0.448234	3.33933	5.09755	5.71957	2.3233	0.013233	1.34169
JUNB	LINC00346	0.667731	2.1397	4.81882	5.71957	2.4115	0.014115	1.34037
HOXA6	BCL2L11	0.843906	3.43122	4.36836	5.71957	1.95006	0.00950061	1.34037
ZIC1	CYP11A1	0.660144	2.66382	5.12748	5.71957	2.18762	0.0118762	1.33986
ZIC1	RALGPS1	0.567558	2.66382	4.54128	0.565511	3.98777	0.0862785	1.33588
MAF	ITGA2	-0.220927	1.43172	2.15542	5.71957	6.37036	0.0537036	1.33405
TEAD4	CPA1	0.44965	4.0781	5.33259	5.71957	2.123	0.01123	1.33341
HOXB5	APOL3	0.749223	3.33933	4.71057	0.505699	5.06887	0.0441191	1.33282
BACH2	TXNDC16	0.421862	1.84639	4.93187	0.461988	5.68805	0.131963	1.33215
HOXB6	EMX2	-0.507577	2.72773	3.4835	0.935857	2.13566	0.137984	1.33012
NR1H2	IGF1	0.522623	3.70204	2.97808	5.71957	2.57027	0.0157027	1.33009
TCF7L2	VSTM4	0.599513	2.23722	3.75786	0.855429	2.6688	0.115539	1.32946
NRL	GRIA3	-0.140027	4.66716	1.11582	5.71957	6.16481	0.0516481	1.328
TEF	ITGA2	-0.33743	3.81032	2.15542	5.71957	3.43712	0.0243712	1.32774
CEBPA	INHBB	-0.408556	4.64148	0.213641	5.71957	8.08338	0.0708338	1.32675
CEBPA	PDCD1LG2	-0.385045	4.64148	3.09382	0.421757	7.09627	0.0801605	1.32653
SIX2	TBC1D22A	0.499757	3.14432	3.34443	5.71957	2.65848	0.0165848	1.32531
ALX4	AEN	0.40456	4.72075	4.70509	5.71957	2.1814	0.011814	1.32451
RXRB	GMNC	0.148488	4.1993	5.13951	0.727875	4.66304	0.121706	1.32382
HOXD8	SLC14A2	-0.154111	4.16452	4.89875	5.71957	3.25865	0.0225865	1.32353
MAF	KLHL2	0.306022	1.43172	4.71556	5.71957	3.88222	0.0288222	1.32226
TEF	C11orf71	0.565676	3.81032	5.23935	5.71957	2.01561	0.0101561	1.32221
ZIC4	RALGPS1	0.508592	4.34749	4.54128	0.652129	3.86848	0.0521677	1.32148
AR	RAD50	-0.530012	3.1561	2.37508	5.71957	2.96279	0.0196279	1.32145
ZIC1	GPER1	0.116666	2.66382	5.05579	5.71957	4.3669	0.033669	1.32131
AR	SNX21	0.184523	3.1561	3.83354	5.71957	3.75519	0.0275519	1.32115
ELF1	FAM151B	0.543839	3.82923	4.62831	5.71957	2.1259	0.011259	1.31951
TCF7L1	CCDC84	0.329183	2.50427	3.47106	5.71957	3.38112	0.0238112	1.3176
DBP	IL20RB	0.580723	3.91504	4.99996	0.446535	4.43315	0.0585455	1.31745
ALX4	IRAK3	0.638102	4.72075	4.1127	5.71957	1.95189	0.00951894	1.31655
AR	RILPL2	0.518841	3.1561	2.76038	0.45602	6.07533	0.105125	1.31648
HOXD3	CNOT6L	0.50312	3.51126	3.67539	4.65418	1.96627	0.0221436	1.31575
FOXD2	MRAS	-0.289371	4.67979	2.62526	5.71957	3.09091	0.0209091	1.31413
ATF5	ZNF624	0.396736	3.1891	5.18886	5.71957	2.43623	0.0143623	1.31385
MAFF	ARID5B	0.641704	3.50182	4.59773	0.46276	3.90319	0.0703869	1.31353
FOXF2	MPPED2	0.330456	4.48359	3.61142	5.71957	2.63041	0.0163041	1.31251
MAFF	PTGS2	0.636449	3.50182	2.87033	2.29356	1.18523	0.0754136	1.31145
ZIC4	NOP2	-0.152726	4.34749	4.59559	5.71957	3.28483	0.0228483	1.30985
MAF	ASPN	0.287682	1.43172	5.26719	5.71957	3.78692	0.0278692	1.30955
HOXB5	FHAD1	0.56965	3.33933	4.1551	5.71957	2.2738	0.012738	1.30938
HEY2	CYP4X1	0.635719	4.53593	5.09332	3.48373	2.1736	0.0117671	1.30866
HOXB5	LRRN4CL	-0.348459	3.33933	3.89462	5.71957	2.80174	0.0180174	1.30846
ZIC1	CYP46A1	0.728883	2.66382	5.03075	0.443256	4.86656	0.0620904	1.30827
NRL	ZNF624	0.1979	4.66716	5.18886	5.71957	2.73927	0.0173927	1.30597
TCF7L1	ZNF215	0.619802	2.50427	5.21671	0.904336	2.23146	0.0798992	1.30555
JUNB	HTRA1	-0.748656	2.1397	3.85307	5.71957	2.48529	0.0148529	1.30314
ZIC1	LRRN4CL	-0.19511	2.66382	3.89462	5.71957	3.89171	0.0289171	1.30289
SIX1	GGT7	0.295123	2.092	3.83068	5.71957	3.64164	0.0264164	1.30129
ZIC1	ADRA2C	0.927962	2.66382	4.63848	0.401128	5.312	0.0532324	1.30056
HOXA11	BCL2L11	0.716259	4.03405	4.36836	5.71957	1.9312	0.00931196	1.29826
HOXC6	CCDC112	0.427891	2.69343	4.35727	5.71957	2.68381	0.0168381	1.29796
MAFB	MYBL1	-0.555456	3.25379	0.762046	0.87378	9.68799	0.111198	1.29645
ZIC1	LINGO1	0.407857	2.66382	5.17616	5.66842	2.57695	0.015777	1.29602
BACH2	SCARF2	-0.220101	1.84639	3.62923	5.71957	4.45105	0.0345105	1.2958
RFX1	HOXA13	0.574451	4.29055	5.32183	5.71957	1.90605	0.00906054	1.29563
AR	KPNA5	0.572769	3.1561	3.69616	2.03828	1.3131	0.0724285	1.29525
AR	RFX7	-0.592553	3.1561	4.22111	2.17783	1.71171	0.0439702	1.29395
ALX4	LSM1	-0.52863	4.72075	3.8658	5.71957	2.11055	0.0111055	1.2933
ATF2	ADHFE1	0.685632	3.21258	5.14093	5.71957	1.99821	0.00998205	1.29185
FOSB	ANTXR2	-0.28344	1.54464	2.23297	5.71957	5.33124	0.0433124	1.29114
TCF7L2	VSTM2L	0.369346	2.23722	4.75495	5.71957	2.94774	0.0194774	1.29025
NRL	CORO2B	-0.348974	4.66716	1.3487	1.15045	2.54313	0.200617	1.28933
FOSB	OSGIN1	0.57105	1.54464	4.41068	5.71957	2.95811	0.0195811	1.2889
JUND	DIRAS1	0.695648	2.82398	4.00059	3.81852	1.36411	0.0314637	1.28804
NRL	BARX1	0.136348	4.66716	5.30194	5.71957	3.13138	0.0213138	1.28794
HOXB5	FMO3	0.239276	3.33933	4.12174	0.478009	5.61666	0.145546	1.28693
FOSL1	IL7R	0.694528	1.31107	4.32565	1.04062	1.82459	0.171688	1.284
PPARG	YIPF6	0.478027	3.89383	4.09858	5.71957	2.28644	0.0128644	1.28345
MAFB	NUP43	-0.492019	3.25379	4.58799	5.71957	2.31783	0.0131783	1.28321
TCF7L1	UMPS	0.450226	2.50427	4.6928	5.71957	2.61849	0.0161849	1.28254
BACH2	EPM2AIP1	0.703921	1.84639	3.61479	3.36152	1.31012	0.0618617	1.27997
IRF1	FHAD1	0.374851	2.65145	4.1551	5.71957	2.87969	0.0187969	1.27855
FOSB	ITGAV	-0.454355	1.54464	5.17451	5.71957	3.0303	0.020303	1.27792
ALX4	RCAN2	0.20934	4.72075	1.07462	5.71957	5.11291	0.0411291	1.27732
RFX1	SMIM13	-0.462234	4.29055	4.89236	5.71957	2.09714	0.0109714	1.27687
CEBPA	HAPLN3	-0.482881	4.64148	1.96721	0.312864	9.71566	0.0952645	1.27675
SIX2	PRSS3	-0.453651	3.14432	4.33281	5.71957	2.46502	0.0146502	1.27657
MAF	ABHD15	-0.384092	1.43172	4.43651	5.71957	3.5656	0.025656	1.2765
AR	C1S	0.766723	3.1561	3.25769	5.71957	2.255	0.01255	1.27601
CEBPB	BCL2L14	-0.346582	3.0906	4.73212	3.73702	1.32777	0.0506517	1.27393
JUND	PRDM15	0.411328	2.82398	4.78856	5.71957	2.56171	0.0156171	1.27277
NRL	PCDHB11	0.78974	4.66716	5.29009	5.71957	1.67878	0.0067878	1.27083
FOS	PIGC	0.617393	2.29216	4.20714	5.71957	2.494	0.01494	1.26882
ZIC4	IQSEC1	0.625194	4.34749	3.87311	5.71957	2.03512	0.0103512	1.2684
ALX4	CORO2B	-0.249662	4.72075	1.3487	5.71957	4.26783	0.0326783	1.26797
CEBPD	KLHL2	0.48769	2.88805	4.71556	5.71957	2.39173	0.0139173	1.26448
MAFF	BARX1	0.248178	3.50182	5.30194	5.71957	2.74617	0.0174617	1.26378
MAFB	SPECC1L	0.434714	3.25379	3.61644	5.71957	2.63747	0.0163747	1.26357
TCF7L2	OSGIN1	0.835247	2.23722	4.41068	5.71957	2.21118	0.0121118	1.26248
CEBPG	MTIF2	0.535181	3.13378	4.03899	5.71957	2.373	0.01373	1.26233
SOX5	ADPRH	0.473845	2.37189	5.15611	5.71957	2.51424	0.0151424	1.26189
FOXF2	IRAK3	0.237229	4.48359	4.1127	5.71957	2.80052	0.0180052	1.26159
SIX1	PRKAB2	-0.404695	2.092	4.17677	5.71957	3.04644	0.0204644	1.26091
MAFB	IL12RB2	-0.189142	3.25379	5.31025	5.71957	3.1443	0.021443	1.26028
IRF1	HOXA13	0.550888	2.65145	5.32183	5.71957	2.25471	0.0125471	1.25779
ERG	ZNF470	0.347193	4.38615	4.68487	5.71957	2.3251	0.013251	1.2572
TEAD2	ARHGAP28	0.229461	4.15977	3.198	5.71957	3.22757	0.0222757	1.25524
RFX1	CES4A	-0.535393	4.29055	5.23452	5.71957	1.93974	0.0093974	1.25365
FOSB	PSG4	-0.23596	1.54464	1.26752	5.71957	7.40402	0.0640402	1.25286
TCF7L1	DPY19L2	0.651187	2.50427	4.529	5.71957	2.29267	0.0129267	1.25193
NFE2L2	BARX1	0.367725	2.74024	5.30194	0.45407	7.49451	0.0688526	1.25179
JDP2	CCDC69	0.661837	0.838953	4.32753	5.71957	3.55731	0.0255731	1.25025
MAFF	ADO	-0.375605	3.50182	4.06062	5.71957	2.58293	0.0158293	1.24898
HOXD3	IL20RB	0.613036	3.51126	4.99996	0.440759	4.63119	0.0567552	1.24686
FOXL1	UBE2O	0.559963	4.70318	3.23254	5.71957	2.17511	0.0117511	1.24457
JUN	NRN1	0.950461	2.82703	4.47566	5.71957	1.93386	0.00933864	1.24221
SIX2	RAB31	0.484222	3.14432	2.04068	5.71957	3.18906	0.0218906	1.24059
MAFK	RPP30	-0.407472	2.45727	3.96266	5.71957	2.89056	0.0189056	1.24015
NRL	MRPL54	0.593796	4.66716	3.40974	5.71957	2.09425	0.0109425	1.23856
HOXB5	KCNMB2	0.460867	3.33933	4.20247	0.43921	5.90406	0.0738272	1.23817
JUND	GIGYF2	0.612854	2.82398	3.25144	5.71957	2.52247	0.0152247	1.23604
BACH2	TLE2	0.846705	1.84639	4.50288	5.71957	2.32102	0.0132102	1.23452
BACH2	HLX	0.84555	1.84639	5.19751	5.71957	2.20519	0.0120519	1.23346
HOXC5	MTMR4	0.36931	4.67699	4.8421	5.71957	2.18152	0.0118152	1.23298
HOXC10	PRICKLE2	0.54606	3.72429	3.72916	5.71957	2.25841	0.0125841	1.23277
TEAD2	KRT14	0.641406	4.15977	4.23377	0.352373	5.74536	0.0538714	1.23199
MAFK	SOX30	0.320061	2.45727	5.11736	5.71957	2.86571	0.0186571	1.23076
MAFB	TRIM22	0.15868	3.25379	0.68569	5.71957	8.31205	0.0731205	1.2307
TEF	RAD50	-0.51508	3.81032	2.37508	5.71957	2.70516	0.0170516	1.2298
JUN	TMEM200B	0.880431	2.82703	5.15764	0.875942	3.16476	0.0345226	1.22856
RXRB	KAT2A	0.374741	4.1993	5.03119	5.71957	2.2208	0.012208	1.22771
MYC	SLC25A33	0.696934	2.82788	4.92378	5.71957	2.06647	0.0106647	1.22318
RFX1	PPARGC1A	0.557563	4.29055	4.96382	5.71957	1.932	0.00931998	1.22295
EGR1	HTRA3	0.760808	2.92496	4.09055	5.71957	2.11208	0.0111208	1.22289
HOXD3	GAS1	0.542531	3.51126	3.57889	0.581209	4.47726	0.0689073	1.22249
HOXB5	PIGT	0.734583	3.33933	3.16738	5.71957	2.23208	0.0123208	1.22211
AR	BMF	0.809697	3.1561	5.26492	5.71957	1.85501	0.00855013	1.22053
MAFB	CHI3L2	0.664377	3.25379	5.31955	5.71957	1.9508	0.00950798	1.21995
ALX4	EMX2	-0.383144	4.72075	3.4835	0.387677	7.0074	0.0712495	1.21954
MAFB	GAPVD1	0.737408	3.25379	2.6643	5.71957	2.39104	0.0139104	1.21611
CEBPD	CDC37L1	0.74858	2.88805	4.26353	4.35198	1.6388	0.018498	1.21605
HOXC4	RFX7	-0.307674	4.26209	4.22111	5.52575	2.17069	0.0182533	1.21191
SIX1	NPTXR	0.705733	2.092	4.29242	5.71957	2.39503	0.0139503	1.21105
CEBPG	GAS1	0.44987	3.13378	3.57889	0.619214	6.04171	0.0641305	1.21051
NRL	OSR2	0.808875	4.66716	4.60021	5.71957	1.71155	0.0071155	1.20968
TCF7L1	HOXB4	-0.328218	2.50427	4.54233	0.783947	6.5509	0.0630463	1.20884
NRL	TMEM229B	0.842127	4.66716	5.28979	0.984961	2.722	0.0216656	1.20767
AR	APOL3	0.91175	3.1561	4.71057	0.650069	2.42164	0.0565877	1.20751
AR	SLC30A1	-0.373329	3.1561	1.80078	5.71957	3.69187	0.0269187	1.20606
MAFF	TMEM200A	-0.195043	3.50182	0.449654	5.71957	8.80088	0.0780088	1.20596
FOXF2	TXNDC16	0.685992	4.48359	4.93187	5.71957	1.78043	0.00780427	1.20553
AR	YIPF6	0.584235	3.1561	4.09858	5.71957	2.24315	0.0124315	1.20537
MAF	SNRPC	-0.584681	1.43172	2.72381	5.71957	3.57805	0.0257805	1.20297
ZIC4	TMEM200B	0.572846	4.34749	5.15764	0.819716	2.72382	0.0419202	1.20224
FOXC1	PPARGC1A	0.933555	0.921288	4.96382	5.71957	2.77363	0.0177363	1.20124
NR4A2	CCDC97	0.517221	3.53918	4.76657	5.71957	2.13003	0.0113003	1.20122
ZIC1	TRAPPC6A	0.559967	2.66382	4.48335	5.71957	2.34081	0.0134081	1.20051
JUNB	PDE10A	0.472672	2.1397	4.26796	5.71957	2.76058	0.0176058	1.19992
FOS	PITPNM2	0.662251	2.29216	4.18526	5.71957	2.38386	0.0138386	1.19875
SIX2	ACER3	-0.247961	3.14432	3.00045	5.71957	3.53219	0.0253219	1.19674
SIX1	NME5	-0.359308	2.092	4.61121	5.71957	3.00679	0.0200679	1.19623
BACH2	TSPAN11	-0.109031	1.84639	4.00894	5.71957	5.61434	0.0461434	1.19585
TCF7L1	VPS53	-0.470442	2.50427	3.0247	5.71957	2.97321	0.0197321	1.19573
FOS	VSTM2L	0.497181	2.29216	4.75495	5.71957	2.52544	0.0152544	1.19399
RXRB	ADPRH	0.240163	4.1993	5.15611	0.865407	5.03777	0.0526564	1.19376
ZIC1	RPP30	-0.406147	2.66382	3.96266	5.71957	2.76218	0.0176218	1.19355
ZIC4	PPP1R26	0.500512	4.34749	5.19138	5.71957	1.94805	0.00948054	1.19325
TEAD2	SBSN	0.111288	4.15977	4.16488	5.71957	3.82586	0.0282586	1.19224
CEBPA	TFPT	-0.288679	4.64148	3.69003	4.94142	2.76395	0.0176515	1.19197
AR	SMDT1	0.598994	3.1561	3.62455	2.25683	1.16203	0.0663315	1.19197
RFX1	ATP6V1B2	-0.432838	4.29055	3.88573	5.71957	2.27139	0.0127139	1.19191
FOSB	TRERF1	0.356382	1.54464	1.47437	5.71957	5.58508	0.0458508	1.18875
ZIC4	CYP4X1	0.541869	4.34749	5.09332	5.71957	1.90786	0.00907859	1.18867
BACH2	NEU1	0.600367	1.84639	3.84046	5.71957	2.76468	0.0176468	1.18796
RXRB	RIMS2	-0.274428	4.1993	3.18973	5.71957	2.92902	0.0192902	1.1879
FOXC2	ZNFX1	0.467205	1.97151	1.59657	5.71957	4.28981	0.0328981	1.18705
CEBPA	BCAT1	-0.600242	4.64148	4.51964	1.10152	2.8617	0.0299039	1.18694
TEF	ADAT1	0.548458	3.81032	4.34314	5.71957	2.09205	0.0109205	1.186
MAFF	CYTH3	0.541431	3.50182	3.57415	5.71957	2.3173	0.013173	1.18315
FOXD2	TXNDC16	0.508191	4.67979	4.93187	0.868332	3.26	0.0355897	1.18166
SIX2	CEACAM19	-0.367123	3.14432	2.65075	0.46058	6.2702	0.133669	1.1812
HOXB5	OSR2	0.874616	3.33933	4.60021	5.71957	1.8346	0.00834596	1.17662
FOSB	TFAP2A	-0.441789	1.54464	2.71181	5.71957	3.86944	0.0286944	1.17519
BACH2	HTRA1	-0.230629	1.84639	3.85307	5.71957	4.07315	0.0307315	1.17468
HEY2	RALGPS1	0.633326	4.53593	4.54128	1.00475	2.04236	0.0438566	1.17408
ALX4	LRRN4CL	-0.210742	4.72075	3.89462	5.71957	2.85468	0.0185468	1.17333
MAF	BEND7	-0.149712	1.43172	2.74941	1.11779	10.2205	0.174217	1.17293
MAFK	HEY2	0.806199	2.45727	5.04171	0.449338	4.33777	0.0601556	1.17109
TCF7L2	C6orf132	0.674897	2.23722	3.24284	0.42977	6.86585	0.0808586	1.16823
ATF5	TRABD2B	0.225124	3.1891	3.85812	5.71957	3.26096	0.0226096	1.16807
DBP	TRAF3	-0.60983	3.91504	2.62846	5.71957	2.37192	0.0137192	1.16799
HOXB5	EPGN	-0.159201	3.33933	2.14423	5.71957	4.75954	0.0375954	1.16665
HOXC10	ANTXR1	0.61459	3.72429	2.86931	3.66171	1.49895	0.0323491	1.16612
TEAD4	PIGT	0.598633	4.0781	3.16738	5.71957	2.19895	0.0119895	1.166
HOXC9	HHIPL1	0.565272	3.16558	3.6085	5.71957	2.34577	0.0134577	1.16588
HOXA11	BRAP	0.465883	4.03405	4.37167	5.71957	2.15189	0.0115189	1.16482
JUNB	PPARGC1A	0.227528	2.1397	4.96382	5.71957	3.44491	0.0244491	1.16415
FOSB	LDB3	0.631132	1.54464	3.8427	1.5125	1.32636	0.154809	1.16342
HOXB6	AMZ1	0.832225	2.72773	4.69361	2.32042	1.81874	0.0258544	1.16258
SIX2	FTSJ1	-0.386107	3.14432	4.74713	5.71957	2.44311	0.0144311	1.16218
NRL	PITX2	-0.462064	4.66716	3.75624	1.97241	1.26466	0.0575041	1.16192
AR	CLDN23	0.115209	3.1561	5.29961	5.71957	3.78484	0.0278484	1.1617
MAFF	RFK	0.275674	3.50182	4.73568	5.71957	2.66629	0.0166628	1.16169
FOXC2	TBC1D22A	0.209306	1.97151	3.34443	5.71957	4.36751	0.0336751	1.16093
AR	ATOH8	0.619119	3.1561	1.7894	1.1697	2.18731	0.129556	1.15898
TCF7L1	TMEM127	-0.535329	2.50427	3.30198	5.71957	2.69646	0.0169646	1.15819
MAF	IL12RB2	-0.225185	1.43172	5.31025	5.71957	3.97524	0.0297524	1.15814
TEAD4	ZNF667	-0.659414	4.0781	4.29065	4.29225	2.10556	0.011085	1.15592
AR	ZNF273	0.161352	3.1561	3.21957	5.71957	4.04597	0.0304597	1.15567
AR	CACNB2	0.910722	3.1561	4.32607	1.15029	1.12922	0.0714556	1.15413
TCF7L2	ZNF273	0.395069	2.23722	3.21957	5.71957	3.20801	0.0220801	1.15287
NRL	RFX7	-0.755456	4.66716	4.22111	0.916951	1.52129	0.0555057	1.15235
FOS	KIF27	-0.488126	2.29216	3.21225	5.71957	2.91919	0.0191919	1.15167
FOS	ADO	-0.483013	2.29216	4.06062	5.71957	2.67437	0.0167437	1.15142
HOXD9	TRIB1	0.721302	4.42625	3.80367	5.71957	1.88004	0.00880042	1.14919
FOXO6	LRRC4C	0.538035	4.72486	3.6248	5.71957	2.05889	0.0105889	1.14903
MAFK	VDR	-0.311922	2.45727	3.74604	5.71957	3.18953	0.0218953	1.14686
DBP	CEBPB	0.771639	3.91504	2.81634	5.71957	2.11405	0.0111405	1.14609
FOXC2	GPER1	0.230301	1.97151	5.05579	5.71957	3.4948	0.024948	1.14473
TEAD4	IRAK3	0.447963	4.0781	4.1127	5.71957	2.20454	0.0120454	1.14112
MAFF	CLDN23	0.284702	3.50182	5.29961	5.71957	2.50635	0.0150635	1.14094
AR	GLIS1	-0.113329	3.1561	3.24356	2.28143	1.01426	0.424815	1.14044
MAFK	ZNF674	0.591698	2.45727	5.01087	5.71957	2.22793	0.0122793	1.14
SIX2	ZNF212	0.264041	3.14432	4.6963	5.71957	2.814	0.01814	1.13835
IRF1	TEX2	-0.725121	2.65145	4.18349	1.79705	2.34331	0.0335841	1.13751
IRF1	NXNL2	0.633037	2.65145	4.44404	0.46581	3.144	0.103926	1.13529
TEAD2	DPY19L2	0.644995	4.15977	4.529	5.71957	1.87136	0.00871362	1.13331
TFAP2E	SCG2	0.448236	4.64395	5.04446	5.71957	1.96098	0.00960976	1.13177
ZIC4	AGO1	0.393552	4.34749	3.78365	5.71957	2.31832	0.0131832	1.13165
ZIC4	NAA60	0.779745	4.34749	4.58468	5.71957	1.73392	0.0073392	1.1312
NRL	KLHL36	-0.461837	4.66716	2.97188	5.71957	2.32673	0.0132673	1.13101
HOXC4	NLRP10	-0.244158	4.26209	3.3316	2.80331	1.10465	0.105325	1.13077
TEAD2	TRAF1	0.178344	4.15977	4.96405	5.71957	2.86953	0.0186953	1.12998
TCF7L2	C11orf68	0.587403	2.23722	3.41844	5.71957	2.65522	0.0165522	1.12925
SIX2	PNPLA7	0.500701	3.14432	4.82122	5.71957	2.18724	0.0118724	1.12735
CTCF	MAP1LC3B2	0.258851	2.22212	5.09425	0.86843	5.81774	0.0761393	1.12719
FOSB	PC	0.763383	1.54464	2.86386	5.71957	2.96575	0.0196575	1.12602
GABPA	ZNF502	0.526577	3.32931	5.06466	5.71957	2.06936	0.0106936	1.1238
MAFB	CLTB	0.683085	3.25379	2.7637	5.71957	2.3567	0.013567	1.12332
HOXB5	PRKAB2	-0.371941	3.33933	4.17677	5.71957	2.50811	0.0150811	1.12232
MAFB	FBXW11	0.530697	3.25379	4.58839	5.71957	2.15116	0.0115116	1.12219
BACH2	HAS1	-0.269689	1.84639	3.30241	5.71957	3.98977	0.0298977	1.12193
AR	TMEM159	-0.134167	3.1561	3.82116	5.71957	4.01598	0.0301598	1.12092
ZIC4	ZNF273	0.623489	4.34749	3.21957	5.71957	2.0796	0.010796	1.12065
FOXO3	SBSN	0.630957	2.34657	4.16488	5.71957	2.35074	0.0135074	1.11988
CEBPA	SYNE1	0.405615	4.64148	5.19784	5.71957	1.99919	0.00999194	1.11805
ALX4	SCRG1	0.160201	4.72075	0.222455	5.71957	11.2889	0.102889	1.11765
TCF7L1	HFE	0.44245	2.50427	4.4489	0.853468	4.27611	0.0620535	1.11635
MAFB	FMNL3	-0.591991	3.25379	3.28245	3.35024	2.16591	0.0242979	1.11478
ERG	CDC26	0.482319	4.38615	4.81585	5.71957	1.97012	0.00970117	1.11371
AR	RBP5	0.393093	3.1561	5.16861	5.71957	2.31274	0.0131274	1.11349
SIX1	SCG2	0.136054	2.092	5.04446	5.71957	4.21527	0.0321527	1.11299
FOXJ3	HTR7	0.489514	3.08513	4.13194	5.39221	1.61344	0.0204989	1.11287
ZIC4	ITPKB	0.233233	4.34749	4.99045	5.71957	2.52253	0.0152253	1.11157
NRL	CEACAM19	-0.484427	4.66716	2.65075	0.779958	4.64588	0.0511533	1.11087
RXRB	VDR	-0.29027	4.1993	3.74604	5.71957	2.62123	0.0162123	1.10985
ZIC1	PDE10A	0.567997	2.66382	4.26796	0.491307	5.83032	0.0599758	1.10941
HOXA10	CEACAM19	-0.566829	0.544789	2.65075	5.71957	5.39317	0.0439317	1.10927
TCF7L2	HOXB5	0.740168	2.23722	3.66539	0.449217	6.13311	0.0663244	1.1091
ERG	LRRN4CL	-0.198602	4.38615	3.89462	5.71957	2.93958	0.0193958	1.10634
BACH2	RNF24	0.570492	1.84639	1.58114	5.71957	3.94427	0.0294427	1.10625
FOSB	ATP6V1C2	-0.205824	1.54464	5.19733	5.71957	3.9572	0.029572	1.10594
REL	TRABD2B	0.262102	4.19823	3.85812	5.71957	2.69166	0.0169166	1.10563
GSC	HOXB5	0.391613	4.46241	3.66539	5.71957	2.30616	0.0130616	1.10356
FOSL1	ANKMY1	-0.542894	1.31107	3.52584	5.71957	3.31569	0.0231569	1.1021
HOXB5	RFX7	-0.734306	3.33933	4.22111	0.715809	3.66338	0.0405587	1.10084
MAFK	UNC5C	0.804279	2.45727	2.13315	5.71957	2.69419	0.0169419	1.10062
BACH2	CAPN15	0.379922	1.84639	4.72031	2.4586	1.38898	0.0971435	1.09847
HOXA11	AEN	0.481422	4.03405	4.70509	5.71957	2.03342	0.0103342	1.09825
FOSB	DOK4	0.751848	1.54464	4.43599	5.71957	2.49292	0.0149292	1.09662
HOXD3	LY6K	-0.380699	3.51126	3.60833	1.05429	4.05975	0.0531112	1.09647
NRL	STAU1	0.909644	4.66716	4.28533	5.71957	1.64038	0.00640379	1.09308
BACH2	DNAJC7	0.373149	1.84639	2.76038	5.71957	3.70853	0.0270853	1.09264
SIX1	AMPH	0.457536	2.092	4.43631	5.71957	2.67892	0.0167892	1.09235
FOXO6	APOL3	0.905416	4.72486	4.71057	4.18729	1.74117	0.00742624	1.09107
HOXA10	VSTM4	0.409762	0.544789	3.75786	5.71957	5.29379	0.0429379	1.09062
NRL	CHN1	0.699908	4.66716	4.17062	1.05521	2.99661	0.0252894	1.08943
FOXO6	SCRG1	0.682407	4.72486	0.222455	5.71957	5.67658	0.0467658	1.08907
HOXB8	NOA1	0.632015	4.01038	4.35178	5.71957	1.90558	0.00905579	1.08867
HOXA11	C14orf39	0.563634	4.03405	5.20684	5.71957	1.86239	0.00862393	1.08756
HOXC6	PRICKLE2	0.602267	2.69343	3.72916	5.71957	2.34161	0.0134161	1.08694
FOSL1	GPER1	0.364136	1.31107	5.05579	5.71957	3.34928	0.0234928	1.08624
MAFK	TSPAN11	-0.159152	2.45727	4.00894	5.71957	4.01526	0.0301526	1.08567
NFIX	LRRC4C	0.795635	2.11506	3.6248	5.71957	2.33154	0.0133154	1.08314
FOXL1	CCR7	0.301349	4.70318	5.30448	5.71957	2.16351	0.0116351	1.08243
RXRA	PDSS1	-0.673867	0.227174	5.08029	5.71957	5.45509	0.0445509	1.08104
BACH2	ANKRD9	0.35527	1.84639	4.92105	5.71957	2.97003	0.0197003	1.08028
MAFF	VDR	-0.269787	3.50182	3.74604	5.71957	2.86329	0.0186329	1.07993
ZIC1	MAT2B	-0.301157	2.66382	3.58671	5.71957	3.10859	0.0210859	1.07873
ETV2	PRDM8	-0.336724	4.71737	4.74357	5.71957	2.15888	0.0115888	1.07823
ZIC1	CLEC3B	0.306084	2.66382	4.10074	0.934699	3.36377	0.10251	1.07764
FOXJ2	FMO3	0.301078	4.2708	4.12174	0.472177	5.52325	0.0779628	1.0776
ATF5	GDF6	0.204528	3.1891	2.42969	5.71957	3.98332	0.0298332	1.07716
RXRB	C17orf97	0.798573	4.1993	4.45694	5.71957	1.72833	0.00728328	1.07608
SIX2	GSAP	-0.223492	3.14432	3.69801	5.71957	3.23586	0.0223586	1.07536
SIX2	SLC35A3	0.256394	3.14432	2.26289	5.71957	3.74888	0.0274888	1.07527
ERG	MFAP1	0.224072	4.38615	2.87441	5.71957	3.1276	0.021276	1.07519
NRL	RELB	0.810944	4.66716	5.1179	0.784814	3.18678	0.0221772	1.07439
TCF7L2	VSIG10	0.64869	2.23722	3.91026	5.71957	2.38678	0.0138678	1.07432
NRL	ZNF579	0.823018	4.66716	5.00742	5.71957	1.60718	0.00607181	1.07355
HOXD3	DPY19L2	0.295154	3.51126	4.529	5.71957	2.55807	0.0155807	1.06998
HOXC5	CCDC112	0.402559	4.67699	4.35727	5.71957	2.09023	0.0109023	1.06927
MYC	LANCL3	0.422376	2.82788	4.95087	1.2819	2.64474	0.0532763	1.0681
RUNX1	SLC15A3	0.64592	2.93158	4.57517	5.71957	2.05045	0.0105045	1.06727
DBP	DHX33	-0.26359	3.91504	3.91922	5.71957	2.70537	0.0170537	1.06727
ERG	RSPO2	0.439078	4.38615	5.1285	0.453134	3.98886	0.0597815	1.06723
AR	TMEM200A	-0.251029	3.1561	0.449654	5.71957	7.7531	0.067531	1.06683
AR	ESR1	-0.2451	3.1561	2.69496	2.04272	1.07866	0.232076	1.06604
ALX4	TOMM22	0.70084	4.72075	3.86647	5.71957	1.80652	0.00806519	1.06602
NRL	SLC2A11	0.818288	4.66716	4.29455	0.877389	2.85096	0.0259799	1.06585
NRL	NLRP10	-0.209641	4.66716	3.3316	1.83827	1.25471	0.141724	1.06556
AR	CASC3	0.492379	3.1561	4.23021	3.27348	1.40279	0.0352793	1.06497
HOXB5	IGDCC4	-0.30545	3.33933	3.66765	5.71957	2.78538	0.0178538	1.06407
DBP	CPEB3	0.712687	3.91504	3.48375	2.79025	2.53881	0.0154484	1.06375
HOXB7	EMX2	-0.649281	2.2733	3.4835	0.907817	1.78965	0.127068	1.06147
MAF	IFNAR2	-0.403258	1.43172	3.32553	0.31318	13.2322	0.133387	1.06131
CEBPA	SLC38A11	0.61995	4.64148	5.31633	3.92152	1.91947	0.00921442	1.06103
AR	GGT5	0.323813	3.1561	3.98606	0.934432	3.23682	0.0860824	1.06065
HOXC11	HHIPL1	0.407844	4.46642	3.6085	5.71957	2.25231	0.0125231	1.06044
HOXA4	EMX2	-0.465635	4.40759	3.4835	0.972588	1.96611	0.077229	1.05579
IRF1	IFIT3	0.457929	2.65145	4.40715	2.89002	1.11708	0.0610742	1.05507
MAFB	AHSA1	-0.485748	3.25379	3.55914	0.875733	4.54201	0.0471285	1.05451
RXRB	MAN1C1	0.285438	4.1993	1.95731	2.74167	3.25017	0.0504068	1.05381
RFX2	PPARGC1A	0.799208	1.69054	4.96382	5.71957	2.23028	0.0123028	1.05252
CEBPA	LNX1	0.276436	4.64148	5.06759	5.71957	2.25483	0.0125483	1.05224
FOXF2	LINC00346	0.507993	4.48359	4.81882	5.71957	1.88691	0.00886908	1.05055
GSC	BTN2A2	0.446423	4.46241	4.75029	5.71957	1.97995	0.0097995	1.05016
BACH2	LDB3	0.204487	1.84639	3.8427	1.94553	1.52295	0.244015	1.04898
MAF	ASAP2	-0.121575	1.43172	1.96285	5.71957	7.83813	0.0683813	1.04738
FOXC2	FAM167B	0.189004	1.97151	5.09755	5.71957	3.64459	0.0264459	1.04713
FOXC2	CCDC69	0.300691	1.97151	4.32753	5.71957	3.21629	0.0221629	1.04593
TCF7L1	DIP2C	0.42194	2.50427	3.9265	0.437855	6.77218	0.0849856	1.04554
HOXC10	OVOL2	0.475027	3.72429	5.28037	5.71957	1.98476	0.00984756	1.0443
SP2	DENND2C	0.502882	4.1391	4.03243	5.71957	2.05703	0.0105703	1.04384
FOSL1	SVEP1	0.204616	1.31107	1.58402	5.71957	7.07039	0.0607039	1.04316
MAF	BLNK	0.682042	1.43172	5.32225	5.71957	2.43845	0.0143845	1.04264
TCF7L1	SLMAP	0.508497	2.50427	3.81666	2.86454	3.27591	0.0228328	1.04136
FOXL1	ST3GAL6	-0.356065	4.70318	4.21269	5.71957	2.18241	0.0118241	1.04124
HOXA6	GRIA3	-0.142905	3.43122	1.11582	5.71957	6.28988	0.0528988	1.04123
TCF7L1	ENG	0.664081	2.50427	3.22608	5.71957	2.40863	0.0140863	1.04114
ZIC4	PLEKHO2	0.417619	4.34749	4.76954	5.71957	2.03317	0.0103317	1.04041
HOXC6	NLRP10	-0.339828	2.69343	3.3316	2.73815	1.10071	0.113117	1.03962
JUNB	PIGC	0.711019	2.1397	4.20714	5.71957	2.25769	0.0125769	1.03949
FOS	NLRP10	-0.177843	2.29216	3.3316	4.22821	1.03135	0.175384	1.03869
DBP	SBSN	0.631721	3.91504	4.16488	5.71957	1.91786	0.00917858	1.0371
FOXC2	ADPRH	0.330517	1.97151	5.15611	0.449379	6.82155	0.100406	1.03412
CEBPA	RFX8	-0.311269	4.64148	1.92187	0.833752	2.87131	0.155549	1.03395
MAFB	REXO2	0.497438	3.25379	3.92415	5.71957	2.25912	0.0125912	1.03334
MAF	CHI3L2	0.721383	1.43172	5.31955	5.71957	2.38061	0.0138061	1.03281
HOXC10	LY6K	-0.521921	3.72429	3.60833	5.71957	2.18004	0.0118004	1.032
JUN	HOXB5	0.555606	2.82703	3.66539	5.71957	2.33914	0.0133914	1.03149
MAFB	SIRT7	0.509346	3.25379	4.9769	5.71957	2.06087	0.0106087	1.03143
AR	AMACR	-0.457173	3.1561	4.73947	5.71957	2.19876	0.0119876	1.03094
AR	SARDH	0.495296	3.1561	5.26709	0.641445	4.10903	0.0474671	1.0301
CEBPA	RNF220	-0.574452	4.64148	2.74823	5.71957	2.14547	0.0114547	1.02999
BACH2	C14orf39	0.391708	1.84639	5.20684	5.71957	2.74302	0.0174302	1.02981
FOSB	C14orf39	0.616107	1.54464	5.20684	5.71957	2.47027	0.0147027	1.02935
NRL	AFG3L2	0.80558	4.66716	3.5306	2.41606	1.35803	0.0236295	1.02916
HOXB5	ADAMTSL3	0.430117	3.33933	1.22978	0.389954	11.7652	0.126946	1.02874
BACH2	FARSB	0.315894	1.84639	3.37055	5.71957	3.56224	0.0256224	1.0263
HOXB5	ESR1	-0.41336	3.33933	2.69496	1.02815	2.41928	0.110874	1.02592
PRRX2	LRRN4CL	-0.316543	0.372399	3.89462	5.71957	6.7705	0.057705	1.0259
AR	PRKD2	0.56519	3.1561	4.69513	1.77102	1.31849	0.0524488	1.02572
FOSB	HTRA1	-0.491244	1.54464	3.85307	5.71957	3.02635	0.0202635	1.02548
ZIC4	OPHN1	0.66153	4.34749	3.09028	5.71957	2.00516	0.0100516	1.02455
TEAD2	PIGM	-0.50264	4.15977	4.64103	5.71957	1.94709	0.00947095	1.02349
TCF7L2	CCDC34	0.230997	2.23722	4.34614	5.71957	3.3652	0.023652	1.02249
FOXL1	GLIS1	-0.307243	4.70318	3.24356	0.892175	4.05968	0.0601611	1.0213
HOXB5	ZNFX1	0.800068	3.33933	1.59657	5.71957	2.60607	0.0160607	1.02114
NFE2L2	PRDM6	0.500462	2.74024	3.78479	2.12762	2.61076	0.0353807	1.02007
FOXC2	CCDC22	0.505775	1.97151	5.12746	5.71957	2.43265	0.0143265	1.01916
MAF	MARK1	0.436553	1.43172	2.99418	0.934149	4.55343	0.128	1.01892
HOXA7	FAP	-0.439063	2.78701	2.0051	0.89704	5.20481	0.0888802	1.01818
ERG	COX7B	0.560763	4.38615	3.92414	5.71957	1.9469	0.00946896	1.01769
TEAD4	HOXA11	0.636517	4.0781	4.43106	1.66491	1.54321	0.0343428	1.0149
FOXF2	HRH1	0.140161	4.48359	2.53824	5.71957	3.87195	0.0287195	1.01451
TCF7L1	VSTM4	0.293775	2.50427	3.75786	0.858058	2.79534	0.152753	1.01293
ZIC4	LRRC4C	0.322269	4.34749	3.6248	5.71957	2.43273	0.0143273	1.01242
FOSB	ITM2C	0.425452	1.54464	4.06552	5.71957	3.12143	0.0212143	1.0119
MAFB	CLDN23	0.121689	3.25379	5.29961	5.71957	3.44517	0.0244517	1.01104
TEF	SCUBE3	0.78434	3.81032	1.05062	0.794029	6.4063	0.0632875	1.01081
MAF	SSH1	-0.445231	1.43172	3.10919	1.55875	2.67169	0.122297	1.00941
MAFB	FKBP7	-0.498016	3.25379	3.12391	0.646874	4.55177	0.0676077	1.00769
MAFB	TMEM222	0.410188	3.25379	4.67453	5.71957	2.25221	0.0125221	1.00638
MAFF	ABCB6	-0.653426	3.50182	3.66837	5.71957	2.03084	0.0103084	1.00506
DBP	CTNNBIP1	0.530486	3.91504	4.98641	3.83027	2.16554	0.0116792	1.00325
ZIC1	ADAM33	0.610865	2.66382	3.61801	0.817864	4.2462	0.0490434	1.00273
MAF	SLC14A2	-0.245573	1.43172	4.89875	5.71957	3.72818	0.0272817	1.00197
HOXB5	PEX11A	0.911724	3.33933	4.90317	5.71957	1.69293	0.00692928	1.00159
MAF	CACNA2D3	0.27504	1.43172	3.06207	5.71957	4.34103	0.0334103	1.00025
FOXD2	ASB6	-0.640342	4.67979	4.75963	5.71957	1.71475	0.00714745	0.999829
HOXA13	LIPC	0.919477	4.73616	3.53929	5.71957	1.67641	0.00676412	0.999632
RXRB	KLHL2	0.346826	4.1993	4.71556	5.71957	2.17134	0.0117134	0.999067
BACH2	SNAI1	0.722834	1.84639	4.71874	0.485488	3.64129	0.0897091	0.998756
TEF	GGT7	0.568142	3.81032	3.83068	5.71957	2.03365	0.0103365	0.997033
JDP2	TMEM200B	0.625001	0.838953	5.15764	2.54351	1.95709	0.0739419	0.995416
RFX1	MEIG1	0.235537	4.29055	5.32224	5.71957	2.36688	0.0136688	0.995259
TCF7L2	C14orf39	0.87689	2.23722	5.20684	5.71957	1.89744	0.00897439	0.994864
MAF	ENTPD5	-0.561174	1.43172	4.73686	5.71957	2.69434	0.0169434	0.993712
ERG	EMB	0.358193	4.38615	4.66755	5.71957	2.11825	0.0111825	0.993502
HOXA11	TEX2	-0.68423	4.03405	4.18349	1.59563	1.72232	0.0313063	0.993479
MAFK	ITM2C	0.583891	2.45727	4.06552	5.71957	2.29589	0.0129589	0.992624
HOXB5	TMEM200A	-0.315778	3.33933	0.449654	5.71957	6.57026	0.0557026	0.992523
CTCF	CYS1	0.197167	2.22212	5.26042	5.71957	3.28894	0.0228894	0.992376
AR	CASS4	0.711365	3.1561	5.30877	0.0975006	9.64984	0.0884652	0.99206
FOXC2	PRRT3	0.567283	1.97151	4.57838	0.39249	6.93673	0.0711125	0.991378
RUNX1	NLRP10	-0.171212	2.93158	3.3316	3.69735	1.02961	0.155705	0.991192
FOSL1	SERPINE3	0.295647	1.31107	5.29533	5.71957	3.44789	0.0244789	0.990834
HOXC10	PODNL1	-0.416611	3.72429	2.67169	5.71957	2.60347	0.0160347	0.989779
MAF	ATL2	0.658473	1.43172	3.90185	5.71957	2.7254	0.017254	0.989354
MAFK	RELB	0.455033	2.45727	5.1179	5.71957	2.30905	0.0130905	0.989332
BACH2	EPHA2	-0.175151	1.84639	3.90797	5.71957	4.23275	0.0323275	0.989115
FOXC2	IL7	0.695367	1.97151	0.0939329	5.71957	12.0987	0.110987	0.98902
MAFB	ADCY2	0.238814	3.25379	3.49162	0.915319	5.33184	0.0746635	0.988632
JDP2	RBM23	0.842051	0.838953	4.63534	5.71957	2.85074	0.0185074	0.988154
SIX1	PRPF18	0.794638	2.092	3.93068	5.71957	2.20093	0.0120093	0.987847
CEBPB	KLHL2	0.491856	3.0906	4.71556	5.71957	2.13071	0.0113071	0.987761
RFX2	GNPDA1	0.72928	1.69054	3.61666	5.71957	2.52941	0.0152941	0.986588
MAFB	XG	0.751595	3.25379	2.58709	1.52028	1.57473	0.0651207	0.986356
FOXJ2	OPHN1	0.423319	4.2708	3.09028	5.71957	2.32628	0.0132628	0.985903
ZIC4	TLE2	0.711488	4.34749	4.50288	0.665162	3.574	0.0297618	0.985458
CEBPA	LRRN3	-0.320977	4.64148	5.11576	0.807026	2.50571	0.0638409	0.983918
NRL	PRSS3	-0.696187	4.66716	4.33281	0.913217	3.29397	0.0232298	0.983753
HOXD8	BFSP1	0.543574	4.16452	4.04647	5.71957	1.95808	0.0095808	0.982871
HOXA11	RFK	0.746895	4.03405	4.73568	5.71957	1.7059	0.00705902	0.982753
TCF7L2	KRT34	-0.283449	2.23722	2.76667	0.452608	8.75644	0.141296	0.982475
ZIC1	C17orf97	0.180911	2.66382	4.45694	5.71957	3.3716	0.023716	0.982304
IRF1	PHTF1	0.216598	2.65145	2.7192	5.71957	3.8534	0.028534	0.982087
FOXC2	RBM23	0.418221	1.97151	4.63534	5.71957	2.6777	0.016777	0.982029
ZIC1	IBA57	0.596627	2.66382	5.18185	4.35315	2.22641	0.0122803	0.98019
SIX2	ZNF593	0.34538	3.14432	4.73113	5.71957	2.39265	0.0139265	0.979198
FOSB	EFHD2	0.174464	1.54464	3.93447	5.71957	4.54585	0.0354585	0.9775
HOXD3	C12orf76	0.718796	3.51126	4.97797	1.39026	2.1704	0.0257629	0.976675
HOXC6	ABCA5	0.20929	2.69343	2.80556	5.71957	3.82023	0.0282023	0.974569
RFX1	SARDH	0.528903	4.29055	5.26709	5.71957	1.79413	0.00794132	0.974025
HOXD3	TBRG1	0.849744	3.51126	1.75657	5.71957	2.3698	0.013698	0.973085
IRF1	TMEM229B	0.79026	2.65145	5.28979	1.31548	1.77816	0.0374528	0.971031
HOXB5	ARHGEF37	-0.544427	3.33933	5.18062	5.71957	1.93117	0.00931166	0.968704
MAFB	SGCG	0.473849	3.25379	5.31465	5.71957	2.02186	0.0102186	0.968296
HOXA2	GRIA3	-0.260699	4.5324	1.11582	5.71957	4.11807	0.0311807	0.968292
IRF1	ESR1	-0.184214	2.65145	2.69496	1.73058	2.17739	0.195156	0.967984
FOSB	CDH23	0.724192	1.54464	5.28535	5.71957	2.26394	0.0126394	0.967632
CREM	BCL2L14	-0.459117	3.89421	4.73212	1.79848	1.5739	0.0403986	0.967491
HOXC10	CREB5	-0.222361	3.72429	1.13706	5.71957	4.7654	0.0376547	0.966425
AR	RFK	0.603582	3.1561	4.73568	5.71957	1.95682	0.0095682	0.966081
IRF1	RIMS3	0.516045	2.65145	4.89285	0.835336	3.57037	0.0482746	0.963888
FOXC2	ARHGEF37	-0.195913	1.97151	5.18062	5.71957	3.4446	0.024446	0.963728
TCF7L2	HOXA13	0.728776	2.23722	5.32183	5.71957	1.97987	0.00979873	0.962795
HOXB8	TRPM3	0.120041	4.01038	2.23766	5.71957	4.48352	0.0348352	0.962306
HEY2	ARRDC2	0.833728	4.53593	4.71386	0.995647	2.19179	0.0246871	0.960371
ZIC4	VASH1	0.461545	4.34749	5.14286	0.429799	4.43991	0.0487654	0.960304
FOXL1	BDKRB2	0.422928	4.70318	2.51186	0.583842	6.04678	0.0543951	0.959473
MAFK	TBC1D22A	0.538696	2.45727	3.34443	5.71957	2.50885	0.0150885	0.958528
TCF7L1	TNC	-0.283639	2.50427	1.91772	1.31542	5.04212	0.106084	0.958432
HOXA7	ENKUR	0.469462	2.78701	4.41428	0.835818	3.5841	0.0553818	0.958204
NRL	ZNF414	0.825039	4.66716	4.88509	5.71957	1.56794	0.00567939	0.958062
NRL	SPAG1	0.523997	4.66716	4.76716	5.71957	1.79873	0.00798732	0.958015
HOXA2	APOL3	0.617445	4.5324	4.71057	3.08459	2.11162	0.0111567	0.957967
FOSL1	LRRC2	0.268707	1.31107	2.65258	0.425073	14.0645	0.171452	0.957863
RFX2	CLN6	0.597854	1.69054	4.5911	5.71957	2.4643	0.014643	0.957691
DBP	FAM126B	0.595789	3.91504	2.04757	5.71957	2.43754	0.0143754	0.9572
RFX1	BCL2L11	0.645397	4.29055	4.36836	5.71957	1.77753	0.0077753	0.956215
RFX1	FEM1C	-0.531853	4.29055	4.10583	5.71957	1.92603	0.00926034	0.955782
MAFK	PPARGC1A	0.406912	2.45727	4.96382	5.71957	2.40159	0.0140159	0.955552
CEBPG	SEC31B	0.480032	3.13378	4.98563	2.56774	2.6671	0.0185777	0.954203
ATF5	ASAP2	-0.436834	3.1891	1.96285	5.71957	3.01609	0.0201609	0.95102
MAFF	SKP1	0.438502	3.50182	3.97748	5.71957	2.22369	0.0122369	0.950566
HOXD8	SLC25A33	0.58267	4.16452	4.92378	5.71957	1.78043	0.00780432	0.949533
FOSB	TMEM159	-0.232491	1.54464	3.82116	5.71957	4.01377	0.0301377	0.949413
IRF1	EMX2	-0.500601	2.65145	3.4835	1.2888	1.28355	0.124083	0.949073
CEBPG	SBSN	0.317822	3.13378	4.16488	5.71957	2.56088	0.0156088	0.948365
MAFF	YIPF6	0.197599	3.50182	4.09858	5.71957	2.96894	0.0196894	0.948218
NRL	HEY2	0.371753	4.66716	5.04171	0.417648	4.9737	0.0521522	0.947651
ALX4	NTRK2	0.987591	4.72075	1.04806	0.675447	3.82858	0.0749647	0.947236
MITF	BARX1	0.532023	0.744213	5.30194	0.587885	8.74879	0.0876031	0.945851
DBP	SLC25A33	0.411234	3.91504	4.92378	5.71957	2.02837	0.0102837	0.945767
FOXC1	LRRC4C	0.187332	0.921288	3.6248	5.71957	5.6649	0.046649	0.945562
PPARG	BARX1	0.780568	3.89383	5.30194	4.35082	1.76307	0.00764353	0.944835
NRL	LRR1	0.598336	4.66716	5.24071	5.71957	1.67394	0.00673938	0.944303
AR	KLHL3	-0.307126	3.1561	3.33814	1.84983	1.85726	0.0849393	0.944247
ZIC4	SNRNP35	0.559304	4.34749	4.73899	5.71957	1.79691	0.00796908	0.943776
ATF7	LANCL2	0.652413	1.58164	3.82499	5.71957	2.6049	0.016049	0.943768
ATF5	AMACR	-0.3449	3.1891	4.73947	5.71957	2.34793	0.0134793	0.943645
ZIC1	AMZ1	0.902856	2.66382	4.69361	0.736311	2.45975	0.0459638	0.939723
ERG	KLF12	0.421563	4.38615	2.78017	2.47618	2.05756	0.0358685	0.939432
RXRB	RCHY1	0.534418	4.1993	4.78869	5.71957	1.83353	0.00833534	0.939401
AR	PHTF1	0.343157	3.1561	2.7192	5.71957	2.91388	0.0191388	0.939364
SIX2	NUDT12	-0.518519	3.14432	4.73573	2.40989	1.02486	0.0492507	0.939185
IRF1	MAGI3	0.158704	2.65145	2.21651	5.71957	4.72502	0.0372502	0.93894
ZIC4	FBXL18	0.570163	4.34749	4.29193	4.35549	2.00706	0.0100851	0.937924
TCF7L1	GYG1	0.250856	2.50427	3.79822	5.71957	3.16857	0.0216857	0.937744
MAFB	PAMR1	0.15733	3.25379	1.84617	1.03268	3.80748	0.252032	0.936555
BACH2	ASNSD1	0.126491	1.84639	4.51209	5.71957	4.47332	0.0347332	0.936484
TEAD4	PRKAB2	-0.443091	4.0781	4.17677	5.71957	2.05535	0.0105535	0.936351
HOXA5	LRGUK	0.408444	1.5395	4.60981	5.71957	2.92494	0.0192494	0.933461
NRL	ZNF394	0.83949	4.66716	4.92073	5.71957	1.54686	0.00546856	0.932791
AR	PRRX2	0.423925	3.1561	1.02148	2.26775	1.72656	0.174262	0.932502
NRL	FNBP1L	0.74574	4.66716	2.81019	5.71957	1.88447	0.00884471	0.932422
SIX1	ARHGEF37	-0.605799	2.092	5.18062	5.71957	2.15309	0.0115309	0.932308
MAFB	PLEKHG1	0.878214	3.25379	4.01242	0.467525	1.97257	0.0879335	0.929798
ALX4	IL7R	0.901117	4.72075	4.32565	0.753876	2.9426	0.0227717	0.929546
HOXA3	MTMR4	0.394177	1.61208	4.8421	5.71957	2.85096	0.0185096	0.928679
SIX2	DDX27	0.461389	3.14432	2.28925	5.71957	2.76606	0.0176606	0.927938
BACH2	UBAP2L	0.553857	1.84639	0.6279	5.71957	5.54925	0.0454925	0.927148
CEBPA	CAPRIN2	-0.211371	4.64148	2.1134	5.71957	3.33951	0.0233951	0.926523
HOXC9	PDHB	0.535563	3.16558	3.65755	5.71957	2.1917	0.011917	0.926324
HOXC10	PSTPIP2	0.658541	3.72429	4.68692	5.71957	1.78776	0.00787763	0.925942
NRL	SCG2	0.15324	4.66716	5.04446	5.71957	2.67641	0.0167641	0.925842
ZIC1	HOXB7	0.53139	2.66382	2.64224	5.71957	2.63862	0.0163862	0.92493
MAFK	ESR1	-0.467172	2.45727	2.69496	2.0749	1.76346	0.0816922	0.924753
HOXD9	TBC1D30	0.541852	4.42625	5.3002	5.71957	1.73339	0.00733387	0.924273
HOXA6	AHDC1	0.839869	3.43122	3.54365	5.71957	1.85358	0.0085358	0.924123
TEAD2	MFAP5	0.841273	4.15977	2.67075	0.935426	1.61827	0.0652493	0.92316
HOXA2	LRGUK	0.363687	4.5324	4.60981	5.71957	2.03966	0.0103966	0.921619
CEBPD	ADCY2	0.403619	2.88805	3.49162	0.825476	4.40466	0.0622754	0.921588
SIX1	TBC1D30	0.2728	2.092	5.3002	5.71957	2.86153	0.0186153	0.921576
SIX1	RTP4	0.425327	2.092	5.26084	5.71957	2.4208	0.014208	0.920864
FOXD2	LRRC4C	0.277603	4.67979	3.6248	5.71957	2.41446	0.0141446	0.919829
HOXC10	TSPAN2	-0.660302	3.72429	4.45487	0.862238	3.64106	0.0267437	0.91981
MYC	MARK1	0.719577	2.82788	2.99418	0.847072	2.80987	0.0633987	0.919395
CEBPA	PPP1R3D	0.508937	4.64148	5.08028	5.71957	1.76069	0.00760693	0.919314
IRF1	NPAS1	-0.268486	2.65145	3.74337	1.25677	4.20889	0.0652004	0.919057
HOXD3	CTNNBIP1	0.257065	3.51126	4.98641	5.71957	2.45432	0.0145432	0.918857
AR	FRMD4B	-0.495449	3.1561	0.921868	0.349398	13.2849	0.137322	0.918834
NRL	GSC	0.66034	4.66716	4.93199	5.71957	1.64317	0.00643168	0.918783
BACH2	C1QTNF6	0.402893	1.84639	4.00336	5.71957	2.87422	0.0187422	0.917582
ZIC4	SLC2A11	0.79195	4.34749	4.29455	0.252828	5.43033	0.0451769	0.917112
SIX2	GPR132	0.186389	3.14432	5.23882	5.71957	2.83875	0.0183875	0.916628
HOXA11	IL7R	0.854384	4.03405	4.32565	1.09702	2.0321	0.0275772	0.916546
MYC	CYP2R1	0.529504	2.82788	3.50401	0.796286	4.52005	0.0484558	0.915067
FOXD2	PPARGC1A	0.877027	4.67979	4.96382	5.71957	1.51738	0.00517384	0.914802
MAFB	ATP7B	0.423965	3.25379	4.92416	1.2226	2.82173	0.0389974	0.913876
NFIC	ZNF568	0.665318	4.28693	3.95829	5.71957	1.78999	0.00789991	0.913105
RFX1	FNIP2	-0.403649	4.29055	2.00237	5.71957	2.70271	0.0170271	0.912775
ATF5	CYP27C1	-0.435281	3.1891	4.14957	5.71957	2.23753	0.0123753	0.912281
FOXD2	TRMT10B	0.410585	4.67979	3.82957	3.0402	2.57587	0.0158098	0.911028
FOXC2	DNAJC3	-0.118604	1.97151	2.87209	5.71957	5.39454	0.0439454	0.910596
CEBPA	CAMK1D	0.845235	4.64148	2.49723	0.755417	2.19255	0.0560813	0.910013
LEF1	ZNF215	0.822773	4.7403	5.21671	4.36378	1.6282	0.00629373	0.909831
FOXL1	PPARGC1A	0.623006	4.70318	4.96382	5.71957	1.65827	0.00658269	0.908074
ERG	MTHFD2L	0.320429	4.38615	3.99292	5.71957	2.2543	0.012543	0.907573
FOXP2	SMPDL3A	0.627775	4.37716	4.68299	5.71957	1.71773	0.00717726	0.907395
FOXC2	NMI	0.415527	1.97151	5.00104	5.71957	2.53013	0.0153013	0.907177
TEAD2	PAMR1	0.300754	4.15977	1.84617	1.72001	2.63689	0.0864848	0.905972
FOXL1	ADAMTS15	0.383269	4.70318	5.28219	5.60147	1.89489	0.00895257	0.904778
RFX1	NELFA	0.605675	4.29055	4.42209	5.71957	1.77532	0.00775325	0.904699
FOXC2	HOXB6	0.436235	1.97151	3.06626	0.653037	6.03101	0.0870232	0.903839
HOXD8	ACAP2	0.581018	4.16452	4.85315	5.71957	1.76289	0.00762886	0.903287
HOXB8	AMZ1	0.948743	4.01038	4.69361	0.677469	2.164	0.0345002	0.903254
TCF7L2	ZNF182	0.205029	2.23722	5.0987	5.71957	3.14591	0.0214591	0.903032
HOXA5	PPARGC1A	0.910593	1.5395	4.96382	5.71957	2.08698	0.0108698	0.902866
TEF	DBT	0.504856	3.81032	4.28788	5.71957	1.97086	0.00970864	0.902714
TCF7L2	ATP6V1C2	-0.344761	2.23722	5.19733	5.71957	2.54587	0.0154587	0.902356
TEF	UNC5C	0.444097	3.81032	2.13315	0.828195	2.42907	0.124214	0.901995
FOXD2	CCR7	0.433554	4.67979	5.30448	5.71957	1.80926	0.00809261	0.901292
FOXF2	SCAMP5	0.617339	4.48359	4.28008	5.71957	1.75654	0.0075654	0.900438
BARX1	FRMD3	0.666377	4.72145	4.81655	5.71957	1.63525	0.00635251	0.900379
ERG	EDNRA	0.644329	4.38615	3.23461	0.55907	3.03346	0.0580497	0.89995
ZBTB33	SBSPON	0.582411	4.48086	4.33228	5.71957	1.78125	0.00781248	0.899881
ATF5	AEN	0.27774	3.1891	4.70509	5.71957	2.50626	0.0150626	0.899841
HOXA11	GPER1	0.88883	4.03405	5.05579	5.71957	1.55719	0.00557186	0.899608
CEBPA	LY6K	-0.528015	4.64148	3.60833	5.71957	1.9239	0.00923898	0.899038
NFIX	TIAM1	-0.508196	2.11506	3.42019	5.71957	2.62499	0.0162499	0.896902
REL	YIPF6	0.597112	4.19823	4.09858	5.71957	1.83226	0.00832255	0.896111
HOXB5	AHDC1	0.635292	3.33933	3.54365	5.71957	2.02765	0.0102765	0.895955
AR	ACADS	0.566447	3.1561	5.02224	5.71957	1.9122	0.00912204	0.895772
HOXA11	VSTM4	0.104679	4.03405	3.75786	5.71957	3.68002	0.0268002	0.895142
CEBPA	TMEM68	0.591585	4.64148	4.35306	5.71957	1.74855	0.00748551	0.89481
FOS	KIAA1522	0.526044	2.29216	5.0488	5.71957	2.17883	0.0117883	0.894318
HOXD9	C20orf197	-0.383966	4.42625	5.28406	5.71957	1.9108	0.00910803	0.893924
BACH2	FHL2	-0.246721	1.84639	2.62114	5.71957	4.15091	0.0315091	0.89323
MAFF	RELB	0.389126	3.50182	5.1179	5.71957	2.07691	0.0107691	0.892145
SIX2	PEX26	0.550288	3.14432	3.20039	5.71957	2.25072	0.0125072	0.891583
HOXA7	KCNAB2	0.635629	2.78701	5.0236	1.16947	2.59291	0.033022	0.89112
HEY2	PNPLA7	0.49371	4.53593	4.82122	5.71957	1.80105	0.00801053	0.890934
CEBPA	C18orf25	0.39092	4.64148	4.08895	5.71957	2.03247	0.0103247	0.890478
FOXC2	RBFOX2	0.478221	1.97151	3.10107	1.4089	3.6524	0.0590806	0.888875
HOXA11	GUCD1	0.75515	4.03405	4.27848	5.71957	1.70092	0.00700917	0.888745
HOXD8	ARHGAP28	0.417122	4.16452	3.198	5.71957	2.24431	0.0124431	0.887325
MAFB	PPP1R1C	-0.273637	3.25379	5.14372	5.71957	2.40669	0.0140669	0.886792
AR	TFAP2A	-0.531482	3.1561	2.71181	1.40579	1.19009	0.116506	0.886637
IRF1	ZNF483	0.510244	2.65145	3.51356	5.71957	2.37322	0.0137322	0.886033
NRL	ZNF273	0.801559	4.66716	3.21957	5.71957	1.73917	0.0073917	0.885598
FOXP2	HAPLN3	-0.497785	4.37716	1.96721	5.71957	2.46475	0.0146475	0.88508
HOXC5	HAPLN3	-0.173719	4.67699	1.96721	2.4409	4.96885	0.0455809	0.883598
FOS	SLC30A7	-0.476866	2.29216	2.18967	5.71957	3.08854	0.0208854	0.883035
HOXA6	ZNF212	0.507366	3.43122	4.6963	5.71957	1.96188	0.00961877	0.882431
MAF	NOL3	0.793836	1.43172	4.5484	1.8298	2.0394	0.0456849	0.881306
NFATC2	TRIM62	0.794877	3.12279	4.99223	5.71957	1.72202	0.00722019	0.881225
NRL	BNIP2	0.759775	4.66716	1.61748	5.71957	2.2134	0.012134	0.881056
IRF1	ASPA	0.512142	2.65145	5.32708	0.552034	4.44538	0.0496068	0.880601
HOXB5	OSER1	0.604866	3.33933	4.6069	0.702169	3.83143	0.0351614	0.880229
FOS	ZNF273	0.490038	2.29216	3.21957	5.71957	2.6216	0.016216	0.879321
BACH2	FAM222A	0.314872	1.84639	5.33035	5.71957	2.78149	0.0178149	0.878294
SIX2	TRIM23	-0.377959	3.14432	3.8953	0.913863	3.40258	0.0609963	0.878019
ZIC1	SLC2A11	0.939705	2.66382	4.29455	0.102775	9.27647	0.0855509	0.876818
AR	FOXF2	0.349867	3.1561	4.99941	0.888355	1.57457	0.113378	0.875491
GSC	IQSEC1	0.838137	4.46241	3.87311	5.71957	1.64285	0.00642854	0.875021
HOXC11	DMGDH	-0.17401	4.46642	3.32267	5.71957	2.98441	0.0198441	0.874731
FOXL1	ENKUR	0.491419	4.70318	4.41428	0.460777	3.05666	0.0608058	0.87375
MAF	FKBP7	-0.459861	1.43172	3.12391	1.06499	4.76505	0.0835587	0.872145
MAF	TSHR	0.500777	1.43172	3.79067	0.85395	2.49908	0.150218	0.871274
SOX6	LHFPL5	-0.215996	1.42969	4.96917	5.71957	3.68558	0.0268558	0.868716
REL	APOBEC3C	0.397982	4.19823	3.29399	5.71957	2.23466	0.0123466	0.868515
FOSB	ELMSAN1	0.59965	1.54464	4.18512	0.946816	3.61379	0.0654451	0.868037
DBP	LEPR	0.496703	3.91504	1.93338	1.76167	3.93375	0.0332986	0.867577
NFATC2	SH3D21	0.523836	3.12279	4.57223	5.71957	2.00856	0.0100856	0.866591
ZIC1	ANKRD9	0.334047	2.66382	4.92105	5.71957	2.42614	0.0142614	0.866586
SIX2	PPHLN1	0.549935	3.14432	1.75748	5.71957	2.78796	0.0178796	0.866432
CEBPA	C7orf69	-0.254202	4.64148	4.28672	0.724222	2.37634	0.0994816	0.865932
FOXF2	GPR1	-0.333744	4.48359	1.65614	5.71957	3.02054	0.0202054	0.865073
HOXA11	HOXA11	1	4.03405	4.43106	0.957536	1.48225	0.0340966	0.865039
BACH2	BBC3	0.738256	1.84639	4.71466	0.892654	1.98636	0.0759006	0.864906
NFIC	CDKN1C	0.563448	4.28693	4.5788	5.71957	1.7716	0.00771604	0.864722
BACH2	FOPNL	-0.340675	1.84639	2.23513	5.71957	3.81623	0.0281623	0.864236
MAFB	FEM1A	0.76685	3.25379	5.12921	5.71957	1.69605	0.00696046	0.864149
BACH2	KATNAL1	0.191715	1.84639	2.6231	5.71957	4.56439	0.0356439	0.864027
SIX1	SIRT6	0.888312	2.092	4.75541	5.71957	1.89979	0.00899787	0.86402
RFX1	KANK1	-0.642192	4.29055	1.00049	0.922794	2.5181	0.134664	0.862619
FOXL1	TXNDC16	0.362054	4.70318	4.93187	0.374922	5.36487	0.0510618	0.862528
FOXL1	CPXM2	-0.386757	4.70318	2.94364	1.75925	3.55686	0.0257419	0.862483
GSC	GPRC5A	0.437225	4.46241	0.970617	5.71957	3.36366	0.0236366	0.861161
IRX2	COL24A1	0.277711	4.63734	3.8599	5.71957	2.31035	0.0131035	0.860734
ALX4	AKNA	0.415964	4.72075	3.02507	5.71957	2.1679	0.011679	0.860219
NRL	IL3RA	0.769502	4.66716	4.96197	0.365283	3.89792	0.0338704	0.859407
HOXA7	KCTD21	-0.518477	2.78701	5.09216	5.71957	2.01375	0.0101375	0.85915
CEBPA	CWC15	0.243374	4.64148	3.58163	5.71957	2.49059	0.0149059	0.859081
NRL	CACNA1A	0.820284	4.66716	1.67103	3.07735	1.30387	0.0334624	0.858959
FOSB	TAF1B	0.285684	1.54464	3.41261	5.71957	3.69641	0.0269641	0.858476
AR	ATF7IP	0.372918	3.1561	3.57769	5.71957	2.45306	0.0145306	0.858465
ZIC4	SUSD5	0.239749	4.34749	1.74906	5.71957	3.41183	0.0241183	0.858019
HOXD8	MAN1C1	0.289361	4.16452	1.95731	5.71957	3.06932	0.0206932	0.85684
HOXA7	FAM167B	0.337594	2.78701	5.09755	5.71957	2.33658	0.0133658	0.85671
FOXJ2	ZNF212	0.795764	4.2708	4.6963	5.71957	1.59009	0.00590091	0.856552
HEY2	PRSS3	-0.223836	4.53593	4.33281	5.71957	2.41074	0.0141074	0.855712
SIX2	CRTC1	0.295559	3.14432	4.34415	5.71957	2.48745	0.0148745	0.854352
MAFB	WNT2B	0.701396	3.25379	1.67284	1.06528	3.44171	0.0609353	0.852933
FOSL1	TRIM2	-0.61377	1.31107	3.19549	5.71957	2.95843	0.0195843	0.852121
RXRB	CBX4	0.673571	4.1993	4.1503	5.71957	1.73192	0.00731915	0.851118
CEBPB	MARK1	0.548281	3.0906	2.99418	0.913307	3.95596	0.0463895	0.850377
MAFB	ARID5B	0.428591	3.25379	4.59773	0.432968	5.14584	0.0595018	0.849996
SIX2	KPNA5	0.505604	3.14432	3.69616	5.71957	2.16611	0.0116611	0.848929
TCF7L2	SLC25A20	0.743619	2.23722	4.97149	5.71957	1.92961	0.00929614	0.848557
ALX4	TRIM23	-0.386544	4.72075	3.8953	5.50872	2.05434	0.010548	0.848479
RORA	XG	0.756997	3.27424	2.58709	1.49574	1.7185	0.051437	0.847809
FOSL1	NUFIP1	0.580496	1.31107	4.97319	5.71957	2.53936	0.0153936	0.84623
AR	SYTL3	0.547284	3.1561	4.03411	0.912855	1.75647	0.0757331	0.846137
TCF7L1	CHCHD5	0.469553	2.50427	4.11687	5.71957	2.31791	0.0131791	0.845824
FOSL1	ADO	-0.282184	1.31107	4.06062	5.71957	3.67651	0.0267651	0.845509
NRL	ADAR	0.835701	4.66716	2.83377	5.71957	1.7599	0.00759896	0.845422
CTCF	TRPM3	0.465704	2.22212	2.23766	0.454931	6.89104	0.116373	0.844804
JDP2	LDLRAD2	0.843144	0.838953	5.17922	0.343887	8.24779	0.0810691	0.842388
HOXB5	EYA1	0.423073	3.33933	3.59611	0.942094	2.04302	0.0861397	0.842321
AR	HOXA11	0.624397	3.1561	4.43106	1.82673	1.17571	0.0449129	0.842298
HOXA2	HTRA3	0.716281	4.5324	4.09055	5.71957	1.66546	0.00665457	0.8418
HOXA4	LRGUK	0.357178	4.40759	4.60981	5.71957	2.00927	0.0100927	0.841745
MAF	ZFPM1	0.475086	1.43172	4.24427	0.499496	6.26581	0.0930224	0.840486
ATF5	NFKBIZ	0.537132	3.1891	3.65567	5.71957	2.11044	0.0111044	0.83936
ZIC1	PDZD7	0.538479	2.66382	5.24276	0.400737	5.27558	0.0527427	0.838547
HOXB8	GRIA3	-0.121893	4.01038	1.11582	5.71957	5.7075	0.047075	0.838222
MAFF	NFATC2	0.365839	3.50182	3.50603	0.408451	6.559	0.0695454	0.836844
AR	ZNF493	-0.523302	3.1561	1.88354	5.71957	2.72526	0.0172526	0.836575
AR	SBSPON	0.499557	3.1561	4.33228	0.459248	3.76733	0.0707506	0.836112
AR	ACSS1	0.391637	3.1561	5.30641	5.71957	2.07423	0.0107423	0.835894
NR4A2	VPS4A	0.801524	3.53918	4.5204	5.71957	1.67882	0.0067882	0.835831
TEAD4	TOMM22	0.650383	4.0781	3.86647	5.71957	1.79416	0.00794165	0.835754
TCF7L1	EGFLAM	0.358026	2.50427	5.01194	1.57364	2.24474	0.0526453	0.835667
FOXC2	CCNO	0.149091	1.97151	5.31167	5.71957	3.59904	0.0259904	0.835298
AR	UBIAD1	0.722755	3.1561	5.04489	0.903858	1.77311	0.0451377	0.83247
CREM	ZNF470	0.461766	3.89421	4.68487	5.71957	1.9061	0.00906096	0.832188
TCF7L1	NTF3	-0.249484	2.50427	2.65723	0.465864	5.56561	0.19323	0.831764
HOXC10	RAD17	0.653193	3.72429	3.43986	5.71957	1.90984	0.00909841	0.831674
HOXA6	FAM120AOS	0.557662	3.43122	4.66163	5.71957	1.87052	0.00870525	0.83074
JUNB	TMEM200B	0.818284	2.1397	5.15764	0.881476	3.08961	0.033778	0.830722
HOXD3	PHF7	0.472009	3.51126	5.10921	5.71957	1.90187	0.00901867	0.830719
BACH2	LINGO1	0.593463	1.84639	5.17616	0.40177	5.96279	0.061085	0.830017
HOXA6	CCDC97	0.579242	3.43122	4.76657	5.71957	1.8345	0.008345	0.829511
ERG	COL5A3	0.112641	4.38615	1.48803	5.71957	4.96896	0.0396896	0.829273
JUN	HSPA12A	-0.227018	2.82703	4.06574	5.71957	2.90934	0.0190934	0.829034
CEBPA	KIRREL3	-0.449575	4.64148	0.845962	5.71957	3.40793	0.0240793	0.828526
FOXC2	CLPB	0.241371	1.97151	4.84473	0.855679	6.18843	0.0676718	0.826136
RXRB	SBSN	0.122158	4.1993	4.16488	5.71957	3.14751	0.0214751	0.825975
NRL	C14orf39	0.833523	4.66716	5.20684	5.71957	1.48093	0.00480929	0.82513
FOSB	ENOX1	-0.368042	1.54464	0.284703	5.71957	9.94751	0.0894751	0.82394
NRL	TRMT5	-0.502543	4.66716	5.03743	0.419292	4.05544	0.0410006	0.823721
ZIC4	SLC17A9	-0.126734	4.34749	4.50033	5.71957	2.96131	0.019613	0.823696
HOXD8	HTR7	0.400465	4.16452	4.13194	0.96894	2.46839	0.0499638	0.823474
JUNB	EFHD2	0.573678	2.1397	3.93447	5.71957	2.29732	0.0129732	0.823264
BACH2	ATOX1	0.671853	1.84639	1.66974	5.71957	3.18223	0.0218223	0.822698
NRL	CCDC69	0.419671	4.66716	4.32753	5.71957	1.89534	0.00895337	0.822695
HOXB5	CLCF1	0.603308	3.33933	3.88893	5.71957	1.94419	0.00944186	0.822596
AR	SPEG	-0.43032	3.1561	3.69379	0.446875	5.18979	0.0706464	0.821941
FOXO6	ADAMTSL3	0.578583	4.72486	1.22978	5.71957	2.6269	0.016269	0.82177
AR	BARX1	0.280492	3.1561	5.30194	0.054994	18.0675	0.176024	0.8209
AR	GNL2	-0.325991	3.1561	1.03077	5.71957	4.21224	0.0321224	0.820734
HOXD9	PIGZ	0.609466	4.42625	3.74378	5.71957	1.79258	0.00792583	0.820698
HOXA11	RBM22	0.757487	4.03405	4.27026	5.71957	1.66132	0.00661319	0.819971
ERG	TMEM62	-0.129755	4.38615	4.63149	5.71957	2.88511	0.0188511	0.819957
ETV2	STK32B	-0.473731	4.71737	1.43417	0.658575	5.92531	0.0655592	0.819942
MAFF	RBM23	0.439979	3.50182	4.63534	5.71957	2.0024	0.010024	0.819902
KLF4	DENND2C	0.944965	0.510868	4.03243	5.71957	3.25929	0.0225929	0.819878
RXRA	ABCA5	0.615541	0.227174	2.80556	5.71957	6.56032	0.0556032	0.818507
HOXC5	ARHGAP28	0.417375	4.67699	3.198	5.71957	2.09419	0.0109419	0.818168
BARX1	VIT	0.201221	4.72145	3.58167	5.71957	2.60993	0.0160993	0.817776
[truncated: 8,550 more rows]

## Sheet: Individual3_specific_network
TF	TG	corr	-log10P_TF	-log10P_TG	-log10P_Regulation	Fold	Activity	Score
TFAP2A	PABPC5	0.685891	2.12337	5.02333	5.7476	11.9917	0.109917	55.4246
SIX2	ACVR1C	0.752597	3.16677	5.04507	5.7476	9.3225	0.083225	53.6189
SIX2	IQCE	0.56644	3.16677	4.23915	5.7476	10.4722	0.0947218	43.3533
NR3C2	HELB	-0.415648	3.84273	4.62618	5.7476	10.2882	0.0928823	40.5833
FOXC2	POU3F3	0.628824	2.81653	5.19178	5.7476	8.81053	0.0781053	36.3687
TFAP2A	IQCA1	-0.371623	2.12337	3.37297	5.7476	14.3975	0.133975	29.5077
SIX2	GLIPR1	0.671172	3.16677	2.50396	5.7476	9.85262	0.0885262	26.6801
SIX2	ALKBH8	-0.487014	3.16677	4.23688	5.7476	8.65993	0.0765993	24.9132
NR3C2	CYB561D1	0.528916	3.84273	4.65765	5.7476	6.65004	0.0565004	20.4435
IRF1	TEK	0.561364	2.69805	3.53916	1.47501	15.9351	0.15037	18.9454
SIX2	TRIB2	0.741793	3.16677	3.38777	5.7476	6.69011	0.0569011	17.4122
TFAP2A	LRRC17	0.567493	2.12337	4.40254	5.7476	7.52062	0.0652062	14.9527
SIX2	ACTL10	0.428977	3.16677	5.13273	5.7476	6.55173	0.0555173	14.5771
TFAP2A	NRN1	0.725455	2.12337	4.4528	2.76478	1.92322	0.378372	13.8
NFE2	PRRT3	0.88424	4.25408	4.76421	0.471132	12.3863	0.126676	13.2479
TFAP2A	PRRT3	0.681532	2.12337	4.76421	0.388508	20.6779	0.232697	12.8885
SIX2	APBB1IP	-0.175719	3.16677	0.373792	5.7476	31.845	0.30845	11.7429
SIX2	DNAJC25	0.611736	3.16677	4.35897	5.7476	5.10742	0.0410742	10.1817
MAF	RASSF9	0.696053	0.986989	3.68621	2.86591	4.29777	0.31888	9.94646
ATF5	KLRD1	0.288336	2.9446	3.3896	5.7476	8.22838	0.0722838	9.83821
MAF	GPR155	0.838525	0.986989	3.19292	0.876593	14.3344	0.292664	9.7177
NR3C2	RASSF9	0.318262	3.84273	3.68621	2.98929	5.76064	0.118935	9.23323
HOXC8	HOXC8	1	2.26323	3.07489	0.814094	4.89108	0.319766	8.86075
NFE2	IQCA1	-0.328257	4.25408	3.37297	5.7476	6.05324	0.0505324	8.28088
TFAP2A	GABRB3	0.637775	2.12337	5.16892	5.7476	4.92872	0.0392872	7.79048
IRF1	IRX2	-0.45498	2.69805	4.93716	5.7476	5.02719	0.0402719	7.05235
HOXC10	EMX2	0.816258	3.25038	3.77603	1.13142	1.65548	0.369176	6.92751
TFAP2A	MTF1	0.267816	2.12337	3.77007	5.7476	8.00894	0.0700894	6.91713
FOXC2	WDR19	-0.214357	2.81653	2.99321	5.7476	8.60868	0.0760868	6.80334
TFAP2A	SIM1	0.584452	2.12337	4.11539	0.526797	5.24719	0.479324	6.76683
SIX2	OXTR	0.285507	3.16677	2.61448	5.7476	7.32495	0.0632495	6.29456
ATF5	WIZ	0.580531	2.9446	4.42678	5.7476	4.3205	0.033205	6.23969
FOXC2	DLEU7	0.562565	2.81653	5.15585	5.7476	4.17835	0.0317835	6.23565
FOXC2	SMOC2	-0.131629	2.81653	4.37906	5.7476	8.66224	0.0766224	6.19328
NR3C2	CRISPLD2	0.555712	3.84273	2.14802	0.555105	13.3927	0.180145	6.14317
MAF	SDCBP2	0.511917	0.986989	5.10057	5.7476	6.76354	0.0576354	5.77405
TFAP2A	SH3D21	0.488624	2.12337	4.90446	5.7476	4.93503	0.0393503	5.67958
NR3C2	SELPLG	0.740698	3.84273	4.37221	0.466143	5.14128	0.19027	5.67471
ERG	ERG	1	4.07346	4.76887	1.27909	2.03181	0.11238	5.67356
FOSL2	KCNB1	0.301014	1.4838	4.24275	5.7476	7.56067	0.0656067	5.4026
NR3C2	AMPD3	0.126329	3.84273	4.3751	5.7476	7.07924	0.0607924	5.25355
HOXC10	KCNJ6	-0.502413	3.25038	5.16374	5.7476	3.82379	0.0282379	5.23327
TFAP2A	POU3F3	0.338113	2.12337	5.19178	5.7476	5.42651	0.0442651	5.14603
TFAP2A	PCBP4	0.780507	2.12337	4.71004	5.7476	3.88632	0.0288632	5.03265
FOXC2	ECT2L	0.621862	2.81653	5.13699	5.7476	3.60926	0.0260926	4.87011
TFAP2A	HELB	-0.232781	2.12337	4.62618	5.7476	6.59521	0.0559521	4.84984
RUNX3	MTX3	-0.618186	4.16478	4.39027	5.7476	3.24402	0.0224402	4.72933
SIX2	ZNF790	-0.543568	3.16677	4.84391	5.7476	3.6803	0.026803	4.72737
SIX2	DPH3	-0.594399	3.16677	4.19375	5.7476	3.74359	0.0274359	4.66003
NFE2	AP5B1	0.657115	4.25408	4.91592	5.7476	2.97283	0.0197283	4.63232
NR3C2	PLEKHG1	0.581726	3.84273	4.02114	0.465508	5.65609	0.191768	4.53867
NFE2	NOX5	0.964885	4.25408	4.50924	0.759687	3.23378	0.097351	4.42661
HOXC8	SRFBP1	0.408089	2.26323	3.50536	5.7476	5.34171	0.0434171	4.31562
RUNX3	CCL28	-0.224489	4.16478	4.72762	5.7476	4.63144	0.0363144	4.27279
HOXC8	EMX2	0.752631	2.26323	3.77603	1.33974	1.25277	0.393916	4.25247
FOXC2	AXDND1	0.327239	2.81653	5.16057	5.7476	4.47122	0.0347122	4.243
SIX2	MMP16	0.827406	3.16677	1.49123	5.7476	4.87527	0.0387527	4.24294
TFAP2A	JPH2	0.430687	2.12337	4.25678	0.457312	10.8838	0.212266	4.11283
FOXF2	JPH2	0.617686	4.16797	4.25678	5.7476	3.06162	0.0206162	3.97577
SIX2	SMIM8	-0.354387	3.16677	2.99478	5.7476	5.02934	0.0402934	3.91463
HOXC8	DKK2	0.507718	2.26323	4.82478	0.871279	4.79436	0.167012	3.86782
RUNX3	RPS6KA5	-0.632505	4.16478	3.88988	5.7476	3.09023	0.0209023	3.80421
NR3C2	NINJ2	0.198524	3.84273	4.87835	0.766442	9.52549	0.139651	3.79436
RUNX3	CNDP2	0.709446	4.16478	4.38351	5.7476	2.80648	0.0180648	3.77411
NR3C2	KCNJ6	-0.222985	3.84273	5.16374	0.426243	12.6739	0.157334	3.76072
FOXC2	ZNF772	0.288917	2.81653	5.08556	5.7476	4.4962	0.034962	3.73899
FOXC2	JPH2	0.351826	2.81653	4.25678	0.449823	11.1241	0.176377	3.72281
NR3C2	DICER1	-0.456539	3.84273	3.13626	5.7476	3.9561	0.029561	3.6983
SIX2	TP53BP1	-0.404446	3.16677	2.6858	5.7476	4.84675	0.0384675	3.68621
FOSL2	RASSF9	0.617703	1.4838	3.68621	5.7476	4.86095	0.0386095	3.64449
NFE2	2022-12-01	0.869519	4.25408	2.1757	0.463653	5.89885	0.162751	3.58235
TFAP2A	NOX5	0.689819	2.12337	4.50924	0.647278	2.02257	0.414087	3.58057
HOXC10	TTC26	-0.510505	3.25038	3.85733	5.7476	3.6527	0.026527	3.56459
SIX2	TEK	0.437817	3.16677	3.53916	0.463651	7.3871	0.206287	3.46693
DLX1	GALNT3	0.590772	4.05794	4.90815	5.7476	2.80221	0.0180221	3.41537
TP63	KIF9	-0.417831	3.9174	4.56016	5.7476	3.36411	0.0236411	3.41194
RUNX3	PTPN3	-0.503095	4.16478	4.1762	0.693416	6.45511	0.0870775	3.41056
ERG	WDR78	-0.30672	4.07346	3.88853	4.68065	4.38678	0.0338941	3.38118
FOSL2	MTF1	0.531185	1.4838	3.77007	5.7476	4.97538	0.0397538	3.37801
RUNX3	ALKBH8	-0.48744	4.16478	4.23688	5.7476	3.16127	0.0216127	3.37767
PITX2	LANCL2	-0.611562	2.98482	4.40008	5.7476	3.23903	0.0223903	3.34796
SIX2	SERPINE3	0.498567	3.16677	5.14256	5.7476	3.20861	0.0220861	3.30706
HOXC10	PDE12	0.598442	3.25038	4.64765	5.7476	3.06795	0.0206795	3.29658
HOXC8	PLD5	0.609142	2.26323	5.11753	5.7476	3.37224	0.0237224	3.24395
HOXC8	FGF1	-0.370237	2.26323	4.16888	2.17989	4.08726	0.103156	3.21063
RFX7	TOX2	-0.692587	4.4266	4.6234	5.7476	2.54632	0.0154632	3.20779
STAT4	SRFBP1	0.269426	3.47527	3.50536	5.7476	4.63804	0.0363804	3.18308
NR3C2	GREM1	0.56713	3.84273	1.44116	2.51903	1.96463	0.202884	3.15352
PITX2	MCMDC2	0.645552	2.98482	5.04286	5.7476	2.92144	0.0192144	3.13499
MAFG	SDCBP2	0.845616	0.718613	5.10057	5.7476	4.69494	0.0369494	3.09038
NR3C2	GALM	-0.318647	3.84273	2.32523	5.7476	4.87158	0.0387158	3.08645
HOXC8	LANCL2	-0.509447	2.26323	4.40008	4.088	4.36415	0.033684	3.04875
SIX2	MECR	-0.284893	3.16677	4.74077	5.7476	4.04783	0.0304783	3.0328
MEF2C	GDF6	0.431343	3.40711	3.29897	5.7476	3.82478	0.0282478	3.01067
RUNX3	VIT	0.664036	4.16478	3.03965	1.54007	1.23036	0.186135	2.96488
HOXD8	POGLUT1	0.832531	3.8552	4.13571	5.7476	2.5307	0.015307	2.95538
HOXC10	TOX2	-0.53729	3.25038	4.6234	5.7476	3.05866	0.0205866	2.92218
PAX8	PSG4	0.822849	4.26212	4.79579	5.7476	2.30478	0.0130478	2.90711
TEAD4	WDR66	0.667592	3.87881	4.14808	5.7476	2.72643	0.0172643	2.90594
FOXD1	JPH2	0.740076	0.54122	4.25678	0.458094	13.4617	0.273334	2.87395
HOXC10	TP63	0.620648	3.25038	4.61105	1.41692	1.65245	0.131284	2.85935
NR3C2	LRRC17	0.168641	3.84273	4.40254	5.7476	4.69067	0.0369067	2.83878
TP63	FMO4	0.524049	3.9174	4.40714	5.7476	2.8778	0.018778	2.81011
NFE2	NRN1	0.944626	4.25408	4.4528	0.513682	1.39823	0.214079	2.75134
ERG	STEAP1	0.558446	4.07346	3.76128	5.7476	2.91535	0.0191535	2.74604
SIX4	APBB1IP	-0.457961	3.82692	0.373792	5.7476	9.0266	0.080266	2.72803
MEF2C	PKD1L1	0.465956	3.40711	4.36789	5.7476	3.16143	0.0216143	2.72342
RFX7	HOXC8	0.699892	4.4266	3.07489	0.590595	6.34396	0.0753628	2.68991
NFE2	SIM1	0.789071	4.25408	4.11539	0.897702	4.38075	0.049437	2.68575
TFAP2A	PLEKHO2	0.389859	2.12337	4.5528	5.7476	4.05472	0.0305472	2.68306
FOXD2	DISP2	0.709778	4.36604	5.0601	5.7476	2.29615	0.0129615	2.68233
IRF1	AP1B1	0.682117	2.69805	3.89195	5.7476	3.0944	0.020944	2.66808
RUNX3	PABPC5	0.566348	4.16478	5.02333	5.7476	2.51777	0.0151777	2.60239
NR3C2	DEGS2	0.47285	3.84273	5.17818	5.7476	2.74526	0.0174526	2.59101
SIX2	CASP10	0.619737	3.16677	5.07852	5.7476	2.67267	0.0167267	2.56095
HOXC8	PDE12	0.675688	2.26323	4.64765	5.7476	3.04967	0.0204967	2.55347
PITX2	HOXC8	0.81472	2.98482	3.07489	1.00348	3.06777	0.109367	2.51752
SIX2	FAM71F1	0.250294	3.16677	4.92578	5.7476	3.88441	0.0288441	2.51425
NFE2	VASH1	0.778811	4.25408	4.95828	0.866364	3.89863	0.0450624	2.50032
HOXC10	NTNG1	0.683911	3.25038	4.60629	5.7476	2.60975	0.0160975	2.47246
NR3C2	PTPRE	0.324499	3.84273	4.50236	0.935249	5.00639	0.0937971	2.46567
PITX1	C7orf69	0.861718	3.01944	4.75253	1.77803	1.88457	0.0592843	2.45644
SIX2	ACOT11	0.331803	3.16677	4.13163	5.7476	3.66802	0.0266802	2.44188
DLX2	GALNT3	0.304416	4.05641	4.90815	5.7476	3.19329	0.0219329	2.43978
SIX2	ZBTB8A	-0.32392	3.16677	3.19609	5.7476	4.13088	0.0313088	2.43708
IRF1	AP5B1	0.678504	2.69805	4.91592	5.7476	2.71059	0.0171059	2.39831
NR3C2	DGKG	-0.224051	3.84273	4.47461	2.5774	4.66553	0.0514613	2.384
RUNX3	G6PC3	0.36328	4.16478	4.22128	5.7476	3.09092	0.0209092	2.37239
SHOX2	JPH2	0.787478	3.39409	4.25678	5.7476	2.46835	0.0146835	2.37009
FOXD1	DISP2	0.518847	0.54122	5.0601	5.7476	5.90414	0.0490414	2.36471
NR3C2	OGFOD2	-0.294793	3.84273	5.03773	5.7476	3.21011	0.0221011	2.32709
TFAP2A	DLX2	0.333812	2.12337	4.70824	0.776729	6.61641	0.135004	2.3154
NFE2	ETV3	0.7593	4.25408	4.59818	5.7476	2.2175	0.012175	2.30477
NR3C2	MTF1	0.457518	3.84273	3.77007	0.335391	10.1425	0.102105	2.30218
IRF1	LRRC66	0.458888	2.69805	4.81862	5.7476	3.11967	0.0211967	2.26747
NR3C2	VAMP4	0.439233	3.84273	3.89774	2.36407	3.37879	0.042362	2.22611
NR3C1	RASSF9	0.587005	4.27086	3.68621	3.1054	2.81804	0.0272318	2.20231
TEAD4	SRFBP1	0.37742	3.87881	3.50536	5.7476	3.27552	0.0227552	2.19838
SIX2	SEMA4F	-0.206625	3.16677	4.93478	5.7476	3.95615	0.0295615	2.17046
DLX2	HRCT1	-0.217096	4.05641	4.71508	5.7476	3.55336	0.0255336	2.16531
TFAP2A	ELP6	0.455501	2.12337	4.17296	5.7476	3.59273	0.0259273	2.16086
HOXD8	FMO4	0.580855	3.8552	4.40714	5.7476	2.51349	0.0151349	2.15782
FOXD1	POU3F3	0.424948	0.54122	5.19178	5.7476	6.085	0.05085	2.12355
TFAP2A	RASSF9	0.255003	2.12337	3.68621	1.74047	7.30662	0.081177	2.06048
TFAP2A	TTC26	-0.291765	2.12337	3.85733	5.7476	4.38124	0.0338124	2.03472
HOXC10	TRDMT1	0.43852	3.25038	4.06805	5.7476	3.00514	0.0200514	2.00819
HOXC8	FMO4	0.411736	2.26323	4.40714	5.7476	3.43554	0.0243554	1.97507
TFAP2A	TEX22	0.332099	2.12337	5.10533	5.7476	3.62871	0.0262871	1.97377
HOXC8	ZNF3	0.595791	2.26323	4.3332	5.7476	2.97238	0.0197238	1.96886
CREB3	ALDH4A1	0.864497	2.15835	4.74767	5.7476	2.52569	0.0152569	1.962
NR3C2	MND1	-0.31028	3.84273	5.15027	5.7476	2.9076	0.019076	1.95763
BHLHE41	IRX2	-0.493017	3.08537	4.93716	5.7476	2.68633	0.0168633	1.9554
SIX2	GPATCH1	0.285411	3.16677	4.47282	5.7476	3.43894	0.0243894	1.94885
REL	HHAT	0.412963	3.74376	3.69739	5.7476	2.98531	0.0198531	1.94724
MXD1	SEC16B	0.606502	3.33877	4.17321	5.7476	2.56077	0.0156077	1.94126
REL	MYOZ2	-0.128912	3.74376	4.15382	5.7476	4.62437	0.0362437	1.93116
RUNX3	TEK	0.206446	4.16478	3.53916	5.7476	3.85776	0.0285776	1.92817
MAFG	RASSF9	0.531895	0.718613	3.68621	3.59674	3.67498	0.103265	1.92317
NR3C2	MARVELD1	-0.350409	3.84273	2.10021	5.7476	3.9753	0.029753	1.9225
HOXD8	C5AR1	0.660527	3.8552	3.58863	1.03929	2.32027	0.0858927	1.89277
SIX2	C1QTNF3	-0.351539	3.16677	5.12411	5.7476	2.94193	0.0194193	1.87309
NR3C2	PDE12	0.338521	3.84273	4.64765	5.7476	2.86631	0.0186631	1.85889
IRF1	GPATCH1	0.547298	2.69805	4.47282	1.08378	5.03325	0.0513467	1.84993
IRF1	CXorf38	0.62541	2.69805	4.67786	5.7476	2.57639	0.0157639	1.84256
ATF5	TOLLIP	0.503541	2.9446	4.63109	5.7476	2.71592	0.0171592	1.83926
HOXC8	APLN	0.471544	2.26323	4.70705	5.7476	3.07247	0.0207247	1.83849
SIX2	SWI5	0.611826	3.16677	3.9886	5.7476	2.59289	0.0159289	1.83451
FOXC2	SIM1	0.724999	2.81653	4.11539	0.579105	3.63072	0.102843	1.81715
SIX2	IFI30	0.4996	3.16677	4.38902	5.7476	2.69071	0.0169071	1.81562
NR3C2	SMARCD1	-0.356082	3.84273	4.24101	5.7476	2.88232	0.0188232	1.8096
ERG	HOXC11	-0.134824	4.07346	4.958	5.7476	3.9273	0.029273	1.79922
NFE2	LRRC66	0.17754	4.25408	4.81862	5.7476	3.4618	0.024618	1.78264
HOXC8	RASSF9	0.385936	2.26323	3.68621	3.25568	2.80572	0.0604193	1.77699
FOXC2	ZNF668	0.261969	2.81653	4.61365	5.7476	3.52631	0.0252631	1.74302
HOXB7	JPH2	0.604291	1.85807	4.25678	5.7476	3.06644	0.0206644	1.74074
NFE2	BCL7A	0.370432	4.25408	4.10283	5.7476	2.71618	0.0171618	1.73223
HOXC10	IPCEF1	-0.348767	3.25038	4.77173	5.7476	2.89535	0.0189535	1.70618
TFAP2A	LMO2	0.392638	2.12337	4.85088	0.631175	5.01564	0.133007	1.70291
MAF	KCNB1	0.101588	0.986989	4.24275	1.35739	6.46532	0.455212	1.69945
ERG	OPCML	0.190577	4.07346	5.16557	1.14549	4.78576	0.0771052	1.69503
CREB3L1	ZNF772	0.53871	3.0254	5.08556	5.7476	2.44063	0.0144063	1.675
SREBF1	C7orf69	0.481434	3.22423	4.75253	5.7476	2.54846	0.0154846	1.67322
ERG	IFIT1	0.67305	4.07346	4.79469	0.622355	3.89289	0.0522864	1.66521
NR3C2	EGR3	0.611024	3.84273	4.43051	0.562587	2.99999	0.0943117	1.65587
NR3C2	PLEKHA7	0.479184	3.84273	5.09831	0.72114	4.57135	0.0533417	1.65082
NR3C2	KCNB1	0.15353	3.84273	4.24275	1.10107	2.29456	0.260814	1.64939
EGR3	GLIS1	0.742255	3.83046	4.1123	1.3298	1.99103	0.0532666	1.64895
SOX5	GNG11	0.412407	2.45542	4.18078	5.7476	3.14937	0.0214937	1.64715
TFAP2A	TRAPPC10	0.254436	2.12337	2.29455	5.7476	5.32236	0.0432236	1.63913
TFAP2A	ZNF736	0.293866	2.12337	3.42393	5.7476	4.14233	0.0314233	1.5984
HOXC10	ZNF423	0.29703	3.25038	0.913097	5.7476	6.12546	0.0512546	1.59078
DDIT3	KLRD1	0.27913	1.06606	3.3896	5.7476	5.75537	0.0475537	1.58665
PITX2	ZNF449	0.670071	2.98482	4.77984	5.7476	2.26761	0.0126761	1.57941
NFE2	PRDM16	0.707771	4.25408	2.63743	0.46569	3.55641	0.11992	1.57718
TFAP2A	PITX2	0.343625	2.12337	3.55676	1.5865	1.16174	0.327543	1.56669
TFAP2A	RAP1GAP2	0.328296	2.12337	4.96665	5.7476	3.3383	0.023383	1.55335
TFAP2A	AP5B1	0.188914	2.12337	4.91592	5.7476	4.2299	0.032299	1.54846
ERG	TMEM171	0.630923	4.07346	5.01283	2.01232	1.38374	0.042922	1.53977
TFAP2A	ETV3	0.439359	2.12337	4.59818	5.7476	3.04593	0.0204593	1.53648
NFE2	MEIS3	0.891484	4.25408	1.82075	1.25923	4.20514	0.0419793	1.53494
HOXD8	LANCL2	-0.463173	3.8552	4.40008	5.04863	2.52581	0.0152688	1.52979
FOXO6	C7orf69	0.783097	4.3383	4.75253	0.464639	2.67338	0.076146	1.52716
IRF1	LYPLA1	-0.655986	2.69805	3.37665	5.7476	2.65688	0.0165688	1.51211
ERG	DKK2	0.118672	4.07346	4.82478	0.901055	6.35524	0.112292	1.49975
FOXC2	AP5B1	0.605336	2.81653	4.91592	5.7476	2.33107	0.0133107	1.49471
IRF1	C8orf31	0.874806	2.69805	4.08924	0.460812	3.95414	0.0847555	1.49056
HOXC8	APLP2	0.602717	2.26323	4.03726	5.7476	2.72327	0.0172327	1.48545
NR3C2	ZNF454	-0.115197	3.84273	5.039	5.7476	3.93638	0.0293638	1.48191
TP63	GDF5	0.217386	3.9174	5.07427	5.7476	2.99326	0.0199326	1.48183
HOXC10	CBX6	-0.518411	3.25038	2.10438	5.7476	3.24194	0.0224194	1.48132
TFAP2A	SNIP1	0.142231	2.12337	4.13704	5.7476	5.06407	0.0406407	1.47794
SIX2	PAIP1	-0.479159	3.16677	2.24433	5.7476	3.29256	0.0229256	1.47749
TFAP2A	ENKD1	-0.420029	2.12337	4.91948	5.7476	2.96729	0.0196729	1.47211
FOXC2	POLM	0.22596	2.81653	4.62477	5.7476	3.48346	0.0248346	1.46349
HOXC10	PLEKHG2	0.473761	3.25038	3.67168	5.7476	2.6779	0.016779	1.46018
HOXC8	OPCML	0.416872	2.26323	5.16557	0.864644	3.75291	0.0919266	1.45377
HOXC8	ZNF385D	0.59673	2.26323	4.39238	0.504787	6.29965	0.0768809	1.45028
IRF1	ARSI	0.398602	2.69805	5.06589	5.7476	2.70796	0.0170796	1.44827
TFAP2A	RFX8	0.214861	2.12337	3.43559	3.14742	1.21374	0.241168	1.44406
SIX2	TNKS	-0.548706	3.16677	4.10181	5.7476	2.44163	0.0144163	1.44195
SIX2	ZC4H2	-0.503051	3.16677	1.42504	5.7476	3.84131	0.0284131	1.42409
MEF2A	APOBEC3F	-0.565935	2.79734	4.77837	5.7476	2.37739	0.0137739	1.42376
FOSL1	ATIC	0.654229	0.423381	2.82595	5.7476	6.14407	0.0514407	1.42192
EGR3	IL1RL1	0.82887	3.83046	5.13967	3.69993	2.11115	0.0111392	1.41984
PITX2	ZNF135	0.821556	2.98482	4.54729	5.7476	2.0684	0.010684	1.41633
SIX2	HOXC11	-0.354552	3.16677	4.958	5.7476	2.65994	0.0165994	1.41271
RFX5	HOXC8	0.56035	4.17904	3.07489	5.7476	2.41393	0.0141393	1.41255
RUNX3	EDARADD	0.647471	4.16478	5.17777	0.358643	5.77267	0.0486135	1.40524
HOXC8	ESR1	0.548413	2.26323	2.83238	1.89928	1.21832	0.172629	1.40427
MAF	EML6	0.570481	0.986989	5.08895	5.7476	3.45299	0.0245299	1.39495
SIX4	RASSF3	0.397044	3.82692	4.01573	5.7476	2.55298	0.0155298	1.39045
FOXC2	LRRC17	0.392713	2.81653	4.40254	5.7476	2.76996	0.0176996	1.37219
NR3C2	IQCA1	-0.340404	3.84273	3.37297	0.446786	6.93339	0.100316	1.37108
RFX7	SLC27A3	-0.80147	4.4266	3.9238	5.7476	1.90002	0.00900022	1.36824
MAFG	EGR3	0.903468	0.718613	4.43051	5.7476	3.41619	0.0241619	1.36465
HOXD8	HAS1	0.549341	3.8552	3.01722	0.435602	6.2652	0.0780151	1.3605
TP63	ETV7	-0.593367	3.9174	5.1023	5.7476	1.99452	0.00994522	1.35216
FOXD1	ALDH3B1	0.622143	0.54122	3.7583	5.7476	4.82523	0.0382523	1.34251
HOXC6	FMO4	0.548466	1.82263	4.40714	5.7476	2.84652	0.0184652	1.33095
NR3C2	ADIRF	-0.26756	3.84273	1.53973	5.7476	4.35534	0.0335534	1.32968
NFE2	CLCN4	0.582826	4.25408	4.51013	1.84445	1.75947	0.0363861	1.32043
HOXC10	GNG2	0.633058	3.25038	3.82988	0.696045	4.61364	0.0521599	1.32002
RUNX3	C1QTNF3	-0.290318	4.16478	5.12411	5.7476	2.48667	0.0148667	1.31645
HOXC8	FOXJ2	-0.792408	2.26323	4.03839	5.7476	2.34354	0.0134354	1.31068
NR3C2	CPXM2	0.823617	3.84273	3.59513	0.8486	1.80675	0.0748563	1.3059
TFAP2A	RGS22	-0.341884	2.12337	5.04608	5.7476	3.0359	0.020359	1.30133
RUNX3	UBAC1	-0.57013	4.16478	3.80895	1.36058	3.06474	0.0344945	1.30089
SHOX2	GDF6	0.291623	3.39409	3.29897	5.7476	3.17696	0.0217696	1.29799
NR3C2	PAF1	0.248079	3.84273	4.26527	5.7476	2.90845	0.0190845	1.2972
MAF	DEK	-0.524147	0.986989	2.30025	5.7476	4.87347	0.0387347	1.29112
NR3C2	PIAS1	0.674916	3.84273	3.14405	0.426074	5.6926	0.0650909	1.28734
FOXD2	C7orf69	0.539801	4.36604	4.75253	1.22333	1.56227	0.0598038	1.2802
HOXC9	STK10	0.690853	2.64331	2.06699	0.905532	6.60496	0.056682	1.27965
HOXC10	CLCA2	0.538734	3.25038	5.16543	5.7476	2.14367	0.0114367	1.27456
RUNX3	AP5B1	0.82372	4.16478	4.91592	5.7476	1.74957	0.00749569	1.27118
NFE2	LMO2	0.433067	4.25408	4.85088	0.957085	4.01996	0.0368243	1.26616
FLI1	PABPC5	0.558681	1.09686	5.02333	5.7476	3.22038	0.0222038	1.26511
NR3C1	VGLL3	-0.397615	4.27086	2.80284	5.7476	2.70596	0.0170596	1.26285
RUNX3	F2R	-0.426979	4.16478	3.06732	5.7476	2.56401	0.0156401	1.2572
HOXC10	DNAH7	-0.573408	3.25038	3.53424	5.7476	2.38639	0.0138639	1.25259
NR3C2	ABCA6	0.139076	3.84273	3.5595	0.612114	8.07571	0.133109	1.2517
SIX2	CNDP2	0.391374	3.16677	4.38351	5.7476	2.55124	0.0155124	1.23579
IRF1	PADI2	0.752401	2.69805	4.37575	3.60106	2.52587	0.0152944	1.23574
CREB3L1	SLC4A8	0.313067	3.0254	4.97572	5.7476	2.69091	0.0169091	1.23248
IRF1	AXDND1	0.416684	2.69805	5.16057	5.7476	2.4805	0.014805	1.22458
REL	DLEU7	0.353491	3.74376	5.15585	5.7476	2.33515	0.0133515	1.22269
TEAD4	ALDH4A1	0.470839	3.87881	4.74767	5.7476	2.1437	0.011437	1.22184
TP63	SETD3	-0.275924	3.9174	2.46121	5.7476	3.36986	0.0236986	1.22112
SIX2	CSRP2	-0.287972	3.16677	3.95161	5.7476	2.979	0.01979	1.22108
FOXC2	G6PC3	0.313352	2.81653	4.22128	5.7476	2.93814	0.0193814	1.21937
NFE2L2	MTF1	0.486706	2.67598	3.77007	5.7476	2.63706	0.0163706	1.21834
HOXD8	FGF1	-0.362283	3.8552	4.16888	1.12443	4.02009	0.0460695	1.21254
RUNX3	POU3F3	0.495907	4.16478	5.19178	5.7476	1.98727	0.00987274	1.20918
PITX2	PEX5L	0.425815	2.98482	5.06063	5.7476	2.37554	0.0137554	1.208
HOXC9	PLEKHG2	0.670421	2.64331	3.67168	5.7476	2.36533	0.0136533	1.20775
TFAP2A	SOX18	0.417363	2.12337	5.15665	5.7476	2.70115	0.0170115	1.20694
FOXD1	WDR66	0.935456	0.54122	4.14808	5.7476	3.69752	0.0269752	1.20394
TFAP2A	OGFOD2	-0.31167	2.12337	5.03773	5.7476	3.05446	0.0205446	1.20247
HOXC8	ERG	0.281736	2.26323	4.76887	1.30541	3.70088	0.0817454	1.20089
HOXC8	POGLUT1	0.450352	2.26323	4.13571	5.7476	2.78172	0.0178172	1.2008
HOXC10	APOBEC3F	-0.276762	3.25038	4.77837	5.7476	2.7597	0.017597	1.1998
SIX4	OXTR	0.520595	3.82692	2.61448	5.7476	2.56335	0.0156335	1.19974
ETV5	DKK2	0.628326	1.88554	4.82478	0.908914	4.29758	0.0536715	1.19837
HOXC10	POGLUT1	0.577331	3.25038	4.13571	5.7476	2.21115	0.0121115	1.19458
EGR3	NPAS1	0.747075	3.83046	4.83371	2.68889	1.77195	0.0181242	1.19449
HOXC10	ALDH5A1	-0.796199	3.25038	4.90266	5.7476	1.87376	0.00873764	1.19394
RUNX3	C7orf69	0.30638	4.16478	4.75253	0.906959	1.33281	0.162798	1.19339
TBX15	FLI1	0.597342	2.33673	2.07652	5.7476	3.21668	0.0221668	1.18786
RUNX3	DLEU7	0.27021	4.16478	5.15585	5.7476	2.4503	0.014503	1.1851
NR3C2	EOGT	-0.170083	3.84273	2.07501	5.7476	4.42291	0.0342291	1.18008
FOXP2	APOBEC3F	-0.528686	3.46938	4.77837	5.7476	2.10937	0.0110937	1.17881
HOXC10	RGS7	-0.315979	3.25038	0.766232	5.7476	5.61562	0.0461562	1.17238
HOXC8	TEX2	0.750076	2.26323	3.44751	2.18531	1.75493	0.0521496	1.17048
IRF1	CLCN4	0.821167	2.69805	4.51013	0.705746	2.1346	0.0775979	1.16812
FOXD1	ZNF668	0.548592	0.54122	4.61365	5.7476	4.38271	0.0338271	1.16724
HOXC10	PEX11A	-0.630577	3.25038	4.74055	5.7476	2.0265	0.010265	1.1617
NR3C2	PDS5B	-0.508893	3.84273	1.63949	5.7476	3.05745	0.0205745	1.15918
HOXC8	CYB5R2	0.199208	2.26323	4.65115	5.7476	3.63888	0.0263888	1.15737
TFAP2A	CD74	-0.371731	2.12337	4.82014	5.7476	2.84565	0.0184565	1.14851
ATF5	FAM71F1	0.422959	2.9446	4.92578	5.7476	2.37125	0.0137125	1.14652
MAF	NAPA	0.500302	0.986989	3.87843	5.7476	3.75017	0.0275017	1.13526
STAT4	DLEU7	0.184928	3.47527	5.15585	5.7476	2.98692	0.0198692	1.13027
TFAP2A	BIN1	-0.67908	2.12337	3.84216	2.31506	1.87274	0.047026	1.12954
IRF1	CFI	0.731817	2.69805	3.4724	5.7476	2.25771	0.0125771	1.11897
SIX2	DUSP16	-0.13112	3.16677	3.63191	5.7476	4.12568	0.0312568	1.11776
TFAP2A	PRR15	0.470488	2.12337	5.16391	1.73095	2.3544	0.0531597	1.11763
NFE2	TRMT12	0.765932	4.25408	4.97446	5.7476	1.70171	0.00701712	1.11243
TFAP2A	CCDC157	-0.452173	2.12337	5.14231	5.7476	2.54193	0.0154193	1.11225
NR3C2	KIAA0513	0.361262	3.84273	4.07294	2.00925	1.69526	0.0575412	1.10821
ERG	HTR7	0.276823	4.07346	4.63419	2.36867	1.51272	0.0589151	1.10314
FOXC2	PABPC5	0.257076	2.81653	5.02333	5.7476	2.84838	0.0184838	1.10064
HOXC10	COL8A1	0.372199	3.25038	1.51737	5.7476	3.76215	0.0276215	1.0964
TP63	FIZ1	-0.764738	3.9174	5.08197	5.7476	1.72525	0.0072525	1.09489
HOXC10	GFM2	0.782406	3.25038	4.27901	5.7476	1.91279	0.00912793	1.09204
E2F3	ALDH4A1	0.58818	1.0597	4.74767	5.7476	3.07489	0.0207489	1.08514
NFKB1	NEFH	0.497824	2.30791	5.1576	5.7476	2.34816	0.0134816	1.0782
PITX2	ESR1	0.639138	2.98482	2.83238	1.55317	1.15588	0.109812	1.06523
NPAS2	AMPD3	0.679807	2.0864	4.3751	5.7476	2.29906	0.0129906	1.06521
SIX2	TYK2	-0.380649	3.16677	4.79207	5.7476	2.35419	0.0135419	1.05845
HOXC10	RASGEF1B	-0.253837	3.25038	5.00725	5.7476	2.66794	0.0166794	1.05665
IRF1	DDX43	0.56808	2.69805	4.09608	0.699899	2.62102	0.0902376	1.03925
MAF	MAGOH	-0.581163	0.986989	4.17833	5.7476	3.29131	0.0229131	1.03884
HOXC8	PLEKHG2	0.379076	2.26323	3.67168	5.7476	2.94686	0.0194686	1.03873
HOXC10	CYB5R2	0.208545	3.25038	4.65115	5.7476	2.94292	0.0194292	1.03613
TFAP2A	PDS5B	-0.316943	2.12337	1.63949	5.7476	4.56982	0.0356982	1.03454
NR3C2	FRRS1L	0.352633	3.84273	5.11595	2.02218	1.85973	0.0393099	1.02485
IRF1	OPA3	0.807233	2.69805	3.64448	5.7476	2.07954	0.0107954	1.02419
NFE2	IRX2	-0.116817	4.25408	4.93716	5.7476	3.23814	0.0223814	1.02202
HOXC10	EVI2A	-0.35931	3.25038	4.04754	1.87547	1.89687	0.0605037	1.01748
MAF	ZNF703	0.676067	0.986989	3.27376	3.33665	1.1231	0.124047	1.01547
HOXC10	STEAP1	0.467807	3.25038	3.76128	5.7476	2.32356	0.0132356	1.01093
MSC	TRIM58	0.794209	3.34675	5.18906	5.7476	1.73425	0.00734246	1.00945
NR3C2	ZNF766	-0.205451	3.84273	3.9034	5.7476	2.93426	0.0193426	1.00529
TFAP2A	DGKG	-0.507239	2.12337	4.47461	1.06392	2.99026	0.0654411	1.00338
GATA2	EDARADD	0.370239	4.25401	5.17777	2.30576	2.85282	0.0186312	0.999431
TP63	ATG4C	0.622733	3.9174	4.10943	5.7476	1.90505	0.00905052	0.993456
NR3C2	ANKRD13D	0.646023	3.84273	3.02798	0.665939	4.32274	0.0454996	0.984561
HOXC10	GALNT15	-0.160401	3.25038	1.91444	5.7476	4.66507	0.0366507	0.980861
TFAP2A	XKR8	0.503279	2.12337	4.94743	2.42648	1.78687	0.0427031	0.978918
TP63	AMZ1	-0.479533	3.9174	4.98736	5.7476	1.93681	0.00936808	0.977036
NR3C1	AKAP7	0.525179	4.27086	4.52009	1.57296	2.23414	0.0273948	0.976035
RUNX3	NOL8	-0.724037	4.16478	2.43958	5.7476	2.09926	0.0109926	0.975711
MAF	USP32	-0.478268	0.986989	3.67112	5.7476	3.66801	0.0266801	0.974733
NFE2	HELB	-0.16704	4.25408	4.62618	5.7476	2.82418	0.0182418	0.973405
NR3C2	PREP	-0.402312	3.84273	3.09787	5.7476	2.44245	0.0144245	0.969797
FOXD2	WDR19	-0.329189	4.36604	2.99321	5.7476	2.53979	0.0153979	0.966974
TFAP2A	INPP4A	0.432266	2.12337	2.8359	5.7476	3.08155	0.0208155	0.959647
ERG	RAB3B	0.316648	4.07346	1.86329	5.7476	3.17437	0.0217437	0.953453
RUNX3	ABCB9	0.738256	4.16478	4.90136	4.00096	1.84925	0.00851178	0.949065
HOXC10	SRFBP1	0.124462	3.25038	3.50536	5.7476	3.94873	0.0294873	0.949035
TP63	TOX2	-0.566381	3.9174	4.6234	5.7476	1.86318	0.00863185	0.948232
FOSL2	SLC35F1	0.164148	1.4838	4.85624	5.7476	4.26609	0.0326609	0.947228
SIX2	VCP	0.212539	3.16677	4.03067	5.7476	3.00956	0.0200956	0.943018
TFAP2A	CBWD2	-0.354543	2.12337	4.26915	5.7476	2.81122	0.0181122	0.940563
SIX2	AGO4	-0.246065	3.16677	1.86487	5.7476	3.88648	0.0288648	0.936972
RUNX3	TRAPPC10	0.287986	4.16478	2.29455	5.7476	2.98077	0.0198077	0.93392
NR3C2	ARHGAP24	0.633413	3.84273	1.47773	3.22178	1.1579	0.0695289	0.932941
TFAP2A	ISY1	-0.328133	2.12337	3.66697	5.7476	3.0668	0.020668	0.930794
TFAP2A	NAA40	-0.432665	2.12337	4.80623	5.7476	2.47672	0.0147672	0.928202
RFX7	POGLUT1	0.636845	4.4266	4.13571	5.7476	1.77214	0.00772144	0.916933
FOXC2	PKD1L1	0.110228	2.81653	4.36789	5.7476	3.966	0.02966	0.916833
EGR3	BLOC1S3	0.635234	3.83046	5.04682	5.7476	1.73967	0.00739666	0.90822
HOXC9	GPR156	0.650182	2.64331	5.07269	1.03288	2.62124	0.0383722	0.905724
NR3C2	MORN1	-0.302559	3.84273	4.39763	3.17768	1.40347	0.03947	0.900015
TFAP2A	NDC1	-0.479915	2.12337	4.83247	5.7476	2.35127	0.0135127	0.899274
NR3C2	C5orf46	0.646043	3.84273	1.95797	0.46365	3.86376	0.103116	0.897907
IRF1	WDR66	0.716509	2.69805	4.14808	5.7476	1.98056	0.00980557	0.895088
GMEB1	SLX4IP	-0.447684	3.4661	2.06931	5.7476	2.75499	0.0175499	0.892322
TFAP2A	POLE3	-0.434769	2.12337	4.72116	5.7476	2.45152	0.0145152	0.891412
NR3C2	RAET1E	0.555658	3.84273	5.17632	1.00536	1.61869	0.0494276	0.889042
SIX2	RNF11	-0.362565	3.16677	2.69237	5.7476	2.79143	0.0179143	0.888483
FOXC2	NOX5	0.50423	2.81653	4.50924	1.1064	1.82782	0.0685191	0.88737
MAF	TACC2	0.612017	0.986989	4.23711	0.76202	6.37586	0.0712803	0.88638
FOXC2	CXCL3	0.188018	2.81653	5.18743	5.7476	2.91986	0.0191986	0.885086
RUNX3	NTF3	-0.237031	4.16478	2.65492	0.453768	6.65322	0.111699	0.883816
TFAP2A	KCNJ6	-0.370031	2.12337	5.16374	0.451996	5.53451	0.0869796	0.882797
TEAD4	IRX2	-0.449141	3.87881	4.93716	5.7476	1.92473	0.00924726	0.879887
NFE2	LAT2	0.797843	4.25408	5.14929	1.06136	2.2025	0.0214427	0.876049
IRF1	SETMAR	-0.534485	2.69805	3.88577	5.7476	2.21692	0.0121692	0.868878
IRF1	RBM41	-0.518622	2.69805	2.78441	5.7476	2.53202	0.0153202	0.868665
TFAP2A	2022-12-01	0.668536	2.12337	2.1757	0.0237303	34.3787	0.343854	0.866396
NR3C2	AHI1	0.647828	3.84273	2.57349	5.7476	2.1131	0.011131	0.866089
IRF1	RPRD1B	0.841446	2.69805	4.06721	2.93728	2.35089	0.0135631	0.864788
NFE2	PRR15	0.818311	4.25408	5.16391	0.669233	2.18368	0.0327917	0.861456
MEF2A	HRCT1	-0.454413	2.79734	4.71508	5.7476	2.1583	0.011583	0.861203
RUNX3	PWWP2A	-0.745713	4.16478	1.49391	5.7476	2.35921	0.0135921	0.855118
IRF1	NR2F6	0.734078	2.69805	3.65217	5.7476	2.01677	0.0101677	0.852528
IRF9	BPNT1	0.399071	3.81097	4.5024	5.7476	2.05332	0.0105332	0.851202
TFAP2A	GPR137B	0.533735	2.12337	4.65737	0.942591	1.42186	0.120009	0.848957
HOXC10	FAM71F2	-0.159127	3.25038	4.7398	5.7476	2.99499	0.0199499	0.841901
PITX2	APLP2	0.633855	2.98482	4.03726	5.7476	1.97131	0.00971311	0.840612
ATF5	KCNB1	0.555286	2.9446	4.24275	0.451057	4.25654	0.0630864	0.840261
TFAP2A	PDE12	0.381395	2.12337	4.64765	5.7476	2.53249	0.0153249	0.839591
NR3C1	PPP1R42	-0.151946	4.27086	4.87765	5.7476	2.7046	0.017046	0.838736
HOXC6	ERG	0.401679	1.82263	4.76887	1.26089	3.28923	0.0578915	0.838258
ATF5	ANGPTL2	-0.527229	2.9446	1.59954	5.7476	2.97314	0.0197314	0.837297
HOXC8	TRDMT1	0.647659	2.26323	4.06805	5.7476	2.14054	0.0114054	0.836726
TFAP2A	KCNB1	0.1149	2.12337	4.24275	0.903981	2.03646	0.439005	0.836566
TFAP2A	MKI67	-0.384432	2.12337	4.07162	5.7476	2.64931	0.0164931	0.834711
HOXC8	APOBEC3F	-0.379542	2.26323	4.77837	5.7476	2.44542	0.0144542	0.833881
NFE2	CBWD2	-0.453854	4.25408	4.26915	5.7476	1.91753	0.00917533	0.833519
NR3C2	EML6	0.264009	3.84273	5.08895	5.7476	2.24746	0.0124746	0.831941
HOXC8	TOX2	-0.560453	2.26323	4.6234	0.636291	4.01256	0.0555215	0.831321
TP63	AAMDC	-0.630766	3.9174	1.6645	5.7476	2.43723	0.0143723	0.828052
HOXC6	HOXC8	0.507613	1.82263	3.07489	0.749391	4.06917	0.0953773	0.82741
NR3C2	SLC26A5	-0.108933	3.84273	5.13172	5.7476	3.12586	0.0212586	0.820449
FOXF2	THOP1	0.791764	4.16797	4.73403	5.7476	1.57858	0.00578577	0.820096
HOXD8	HRCT1	-0.218152	3.8552	4.71508	5.7476	2.45958	0.0145958	0.818219
HOXC9	EMX2	0.385826	2.64331	3.77603	0.988645	1.78052	0.119872	0.812608
NR3C2	SNX19	0.421822	3.84273	1.44611	5.7476	3.0048	0.020048	0.811601
HOXC8	STEAP1	0.473087	2.26323	3.76128	5.7476	2.4356	0.014356	0.809344
SIX2	MESP2	0.419194	3.16677	5.17454	5.7476	2.01023	0.0101023	0.801783
TFAP2A	MMAA	0.368183	2.12337	4.99585	1.39477	2.2504	0.0653204	0.800773
E2F3	SIM1	0.755622	1.0597	4.11539	0.797194	3.23748	0.0939768	0.799268
MAF	GART	-0.56127	0.986989	1.99797	5.7476	4.05782	0.0305782	0.789337
SIX2	IRGM	0.321144	3.16677	5.16764	5.7476	2.18817	0.0118817	0.785335
DLX2	RAET1E	0.821955	4.05641	5.17632	0.889503	2.42059	0.0211051	0.784272
TFAP2A	APLP1	0.555266	2.12337	4.82105	0.501697	4.18109	0.0657013	0.783383
NR3C2	CMTR2	0.356828	3.84273	4.35085	5.7476	2.08893	0.0108893	0.779978
MAF	PLEKHG1	0.63594	0.986989	4.02114	0.465501	4.45651	0.148818	0.779199
ELK3	DKK2	0.415024	2.04787	4.82478	0.921468	3.76894	0.0541881	0.771715
RUNX3	METTL16	-0.684407	4.16478	2.89486	5.7476	1.8694	0.008694	0.770802
TBX15	APBB1IP	-0.171435	2.33673	0.373792	5.7476	9.97331	0.0897331	0.770223
HOXD8	CCDC148	0.345502	3.8552	3.06867	5.7476	2.37694	0.0137694	0.768898
NFE2	PKD1L1	0.613701	4.25408	4.36789	5.7476	1.69218	0.00692181	0.767693
NR3C1	ESR1	0.359167	4.27086	2.83238	3.21332	1.14773	0.0477104	0.764482
RUNX3	RUNX3	1	4.16478	4.86837	0.853151	1.29234	0.0341606	0.763665
MAF	HELB	-0.272918	0.986989	4.62618	5.7476	3.79569	0.0279569	0.760035
NR3C1	AMPD3	0.269289	4.27086	4.3751	5.7476	2.19457	0.0119457	0.758174
FOSL1	EVA1A	0.692618	0.423381	2.99329	5.7476	4.40547	0.0340547	0.756882
HOXC8	AKAP7	0.771399	2.26323	4.52009	1.32163	1.35259	0.0535347	0.755209
NR3C2	NDC1	-0.390886	3.84273	4.83247	5.7476	1.93505	0.0093505	0.754871
HOXC8	PFDN1	0.617502	2.26323	4.06262	5.7476	2.09958	0.0109958	0.753388
NR3C2	ADAM32	0.569812	3.84273	4.35441	0.454353	3.33941	0.0520495	0.752974
DLX2	KPNA4	0.700688	4.05641	2.81819	5.7476	1.8718	0.00871799	0.751277
PITX2	CCDC148	0.24921	2.98482	3.06867	5.7476	2.94328	0.0194328	0.75039
NR3C2	CCDC153	0.2948	3.84273	5.17702	5.7476	2.07336	0.0107336	0.750157
HOXC10	OPCML	0.244673	3.25038	5.16557	1.06926	4.0452	0.0421924	0.749718
TFAP2A	XG	0.551962	2.12337	2.82534	1.18266	1.18154	0.161935	0.749297
HOXC8	KCNJ6	-0.415409	2.26323	5.16374	0.727904	4.44157	0.0475334	0.74607
HOXD8	EMX2	0.359712	3.8552	3.77603	0.82294	1.65878	0.104014	0.743511
RFX2	RND3	0.572922	1.13504	1.95641	5.7476	3.71872	0.0271872	0.739285
SIX2	TTC32	0.615595	3.16677	4.95122	2.37089	1.87185	0.0172023	0.736872
ATF5	GDPD5	0.175457	2.9446	4.59436	5.7476	2.87442	0.0187442	0.735063
NR3C2	LIMS1	-0.423581	3.84273	2.89971	1.97389	1.65184	0.0474821	0.730721
SIX2	TMEM178B	0.63866	3.16677	0.152875	5.7476	6.91929	0.0591929	0.727845
NR3C2	GSG1L	0.158296	3.84273	5.17421	5.7476	2.56645	0.0156645	0.727258
NR3C2	ALKBH8	-0.174158	3.84273	4.23688	5.7476	2.66671	0.0166671	0.724355
FOXC2	IL18BP	0.374973	2.81653	5.12673	5.7476	2.1052	0.011052	0.724058
RUNX3	SMOX	0.523883	4.16478	3.90467	5.7476	1.81398	0.00813976	0.723004
NR3C1	WDR63	0.571449	4.27086	3.82964	2.26114	2.40793	0.014169	0.721039
TFAP2A	VAMP4	0.46856	2.12337	3.89774	2.49194	1.69332	0.0437875	0.716523
STAT4	DDR2	-0.180051	3.47527	3.02265	5.7476	3.11188	0.0211188	0.714414
FOXF2	IQCE	0.362948	4.16797	4.23915	5.7476	1.9717	0.00971702	0.706169
IRF1	ZDHHC24	0.855631	2.69805	3.24979	2.60329	2.459	0.014662	0.704154
FOXD2	KLHDC10	-0.510703	4.36604	2.71441	5.7476	2.00514	0.0100514	0.70112
RUNX3	ZNF787	0.563529	4.16478	4.16179	5.7476	1.72406	0.00724065	0.700818
SIX4	NRN1	0.333889	3.82692	4.4528	5.7476	2.04688	0.0104688	0.700751
FOXD2	SYNCRIP	-0.314829	4.36604	3.62739	5.16026	2.22162	0.0122246	0.69877
SIX4	DUSP16	-0.429546	3.82692	3.63191	5.7476	2.01154	0.0101154	0.698221
GATA2	DISP2	0.792337	4.25401	5.0601	2.97631	1.76569	0.00769655	0.689853
HOXC10	KIF9	-0.376498	3.25038	4.56016	3.82435	2.36376	0.0136659	0.689406
FOXC2	FN3K	0.63584	2.81653	5.11263	5.7476	1.74838	0.00748379	0.688575
HOXB7	RUNX3	0.900131	1.85807	4.86837	1.04956	2.45638	0.032769	0.687885
MAF	CCDC148	0.117132	0.986989	3.06867	5.7476	6.32821	0.0532821	0.687522
MAF	FABP5	0.806312	0.986989	4.64893	5.7476	2.36515	0.0136515	0.686583
MAF	PAF1	0.373621	0.986989	4.26527	5.7476	3.30037	0.0230037	0.686338
NR3C2	POU3F3	0.168827	3.84273	5.19178	5.7476	2.44664	0.0144664	0.685192
FOXD1	DLEU7	0.489215	0.54122	5.15585	5.7476	3.49276	0.0249276	0.683141
MAF	KRI1	-0.252754	0.986989	4.8115	5.7476	3.68517	0.0268517	0.682661
SIX2	PRR7	0.339368	3.16677	4.95471	5.7476	2.07479	0.0107479	0.682478
ERG	PRDM8	0.335762	4.07346	5.08861	2.19084	1.21469	0.0366645	0.679075
RUNX3	ELP6	0.481505	4.16478	4.17296	5.7476	1.78871	0.00788706	0.678542
FLI1	JPH2	0.922406	1.09686	4.25678	0.439381	5.31101	0.0671727	0.675097
NFE2	PRKG2	0.331531	4.25408	5.16365	0.917315	3.69623	0.027327	0.674773
TEAD4	ATIC	0.715866	3.87881	2.82595	5.7476	1.82124	0.00821235	0.67455
ERG	ISY1	-0.306531	4.07346	3.66697	5.7476	2.17523	0.0117523	0.672758
TEAD1	DKK2	0.366361	4.4925	4.82478	0.598581	3.03482	0.0465312	0.671236
GATA2	SEMA6C	0.755764	4.25401	4.9807	5.7476	1.48953	0.00489533	0.67111
ERG	SERPINB2	0.263542	4.07346	4.7733	0.679532	4.06516	0.0473926	0.670858
CREB3L1	TIMM17A	0.294552	3.0254	3.61981	5.7476	2.46637	0.0146637	0.670531
DLX1	PLEKHG2	0.65031	4.05794	3.67168	5.7476	1.70565	0.00705652	0.670284
NR3C2	ABLIM3	0.243028	3.84273	4.08036	0.866086	3.87766	0.052334	0.669744
IRF1	ALKBH3	0.729805	2.69805	4.46866	5.7476	1.75446	0.0075446	0.669424
PITX2	NFRKB	0.260862	2.98482	4.19614	5.7476	2.45138	0.0145138	0.668128
ESR1	FBXL12	0.422209	2.03395	4.21307	5.7476	2.35888	0.0135887	0.666555
MAF	NAP1L3	-0.316853	0.986989	4.10779	5.7476	3.5449	0.025449	0.666099
HOXC6	NTF3	-0.400762	1.82263	2.65492	0.465881	4.55364	0.16076	0.661376
FOSL2	ABCA6	0.566329	1.4838	3.5595	5.7476	2.524	0.01524	0.661293
TFAP2A	CCDC153	0.275417	2.12337	5.17702	5.7476	2.51202	0.0151202	0.660941
MAF	HAS1	0.342082	0.986989	3.01722	0.451722	9.36726	0.153142	0.660124
HOXC8	BDKRB1	0.333265	2.26323	4.44481	1.8775	1.61329	0.0649258	0.659296
MAF	NR4A1	-0.379212	0.986989	4.05462	0.755341	6.08153	0.0945715	0.659266
HOXC9	KCNJ6	-0.31998	2.64331	5.16374	5.7476	2.1953	0.011953	0.658708
IRF1	PTPN13	-0.609584	2.69805	2.77672	5.7476	2.15981	0.0115981	0.65751
FOXC2	NOP14	0.190842	2.81653	4.29297	5.7476	2.78121	0.0178121	0.657027
HOXC10	MOCS1	0.806122	3.25038	4.93305	5.7476	1.56481	0.0056481	0.656601
FOXD2	ALDH3B1	0.590549	4.36604	3.7583	5.7476	1.69455	0.00694551	0.655511
NR3C2	SLC20A2	0.51457	3.84273	1.41721	5.7476	2.57539	0.0157539	0.653485
CREB3L1	TM9SF1	0.600042	3.0254	2.74375	5.7476	2.09117	0.0109117	0.653245
STAT4	LRRC66	0.389839	3.47527	4.81862	5.7476	1.90933	0.0090933	0.651456
SIX2	MAP1LC3A	-0.289503	3.16677	1.61079	5.7476	3.31333	0.0231333	0.650575
NFE2	ARHGAP39	0.707934	4.25408	5.06177	5.7476	1.49593	0.00495932	0.650013
IRF1	ACVR1C	0.708497	2.69805	5.04507	0.448095	3.44395	0.0436699	0.649927
FOXD2	SCNN1A	0.913824	4.36604	5.17085	5.7476	1.39305	0.00393048	0.649247
HOXC10	TEX2	0.590492	3.25038	3.44751	2.06936	1.49893	0.0315579	0.647709
FOXD1	METTL16	-0.698985	0.54122	2.89486	5.7476	3.74597	0.0274597	0.647465
BHLHE41	MFGE8	0.68116	3.08537	5.58551	5.7476	1.59967	0.00599672	0.647218
RUNX3	UBE2J1	-0.529027	4.16478	3.85114	5.7476	1.75512	0.00755119	0.646348
E2F3	PABPC5	0.728719	1.0597	5.02333	5.7476	2.27445	0.0127445	0.646282
NR3C2	USP32	-0.143156	3.84273	3.67112	5.7476	2.90945	0.0190945	0.644844
SIX2	ARHGAP1	0.359938	3.16677	1.23635	5.7476	3.36521	0.0236521	0.64469
NR3C2	FANCC	-0.277866	3.84273	3.60264	2.75578	1.07494	0.0564426	0.643179
IRF1	MMP16	0.747709	2.69805	1.49123	0.599333	3.72535	0.0956698	0.642594
MAF	KCNJ6	-0.3594	0.986989	5.16374	0.63867	7.58742	0.0723347	0.642055
TFAP2A	AP1S1	0.403308	2.12337	3.28918	5.7476	2.5527	0.015527	0.641686
SIX2	ARL15	-0.321349	3.16677	1.46027	5.7476	3.28519	0.0228519	0.641198
NR3C2	CDS1	0.718256	3.84273	5.1286	5.7476	1.51873	0.00518732	0.640957
NFE2L2	RASSF9	0.2789	2.67598	3.68621	4.14482	2.91966	0.0192458	0.640745
MAF	MECOM	-0.44523	0.986989	1.85398	5.7476	4.22839	0.0322839	0.639219
NR3C2	SDCBP2	0.641333	3.84273	5.10057	5.7476	1.56434	0.00564337	0.637819
TEAD4	STPG2	-0.185815	3.87881	3.68576	5.7476	2.60364	0.0160364	0.6375
RUNX3	IL21R	0.489227	4.16478	3.99458	0.612358	1.08138	0.118212	0.637113
FOXF2	FOXF2	1	4.16797	4.90678	5.7476	1.38993	0.00389933	0.637076
HOXC10	CCDC69	-0.502044	3.25038	4.15752	4.9743	1.95863	0.00959532	0.634242
FOXD1	ALDH4A1	0.750155	0.54122	4.74767	5.7476	2.94344	0.0194344	0.633749
LEF1	RGS4	0.592693	4.38593	0.565538	5.7476	3.28069	0.0228069	0.632223
FOXF2	IPO13	0.674654	4.16797	4.59841	5.7476	1.54858	0.00548579	0.631353
TFAP2A	NUDT9	0.421145	2.12337	3.85238	5.7476	2.35328	0.0135328	0.630572
HOXB2	EMX2	0.38843	3.33247	3.77603	1.42115	1.47354	0.0615182	0.629678
NR3C2	WIZ	0.333912	3.84273	4.42678	0.987831	1.71962	0.0651923	0.629029
FOXD1	AP5B1	0.866013	0.54122	4.91592	5.7476	2.73585	0.0173585	0.628919
FOSL1	RBM24	0.831944	0.423381	4.94385	5.7476	3.05565	0.0205565	0.628677
ELK3	STEAP1	0.805758	2.04787	3.76128	5.7476	1.91816	0.00918163	0.628253
NR3C2	NECAB3	-0.233076	3.84273	4.76578	5.7476	2.17472	0.0117472	0.626755
TFAP2A	DIXDC1	0.732233	2.12337	1.74341	0.938353	1.85425	0.132837	0.626508
SHOX2	DPF3	0.583339	3.39409	2.6945	5.7476	2.01281	0.0101281	0.625089
HOXC8	METTL8	0.677986	2.26323	3.22638	5.7476	2.06308	0.0106308	0.624069
IRF1	ZNF668	0.425753	2.69805	4.61365	5.7476	2.01592	0.0101592	0.623838
TFAP2A	VASH1	0.471202	2.12337	4.95828	0.943867	2.21448	0.0600979	0.623171
MSC	PRKG2	0.316203	3.34675	5.16365	5.7476	1.99427	0.00994275	0.622765
TEAD1	SERPINB2	0.733652	4.4925	4.7733	0.485686	2.38119	0.0342179	0.622588
SIX2	TRAPPC10	0.213375	3.16677	2.29455	5.7476	3.18868	0.0218868	0.621925
ATF5	IQCA1	-0.553222	2.9446	3.37297	5.7476	1.98917	0.00989166	0.621391
NFE2	PABPC5	0.863405	4.25408	5.02333	5.7476	1.41388	0.00413881	0.620565
MEF2C	DLEU7	0.239761	3.40711	5.15585	5.7476	2.17641	0.0117641	0.6198
NR3C2	NMRAL1	-0.471523	3.84273	3.76752	1.03251	2.72396	0.0322552	0.619288
NR3C2	DLX2	0.364437	3.84273	4.70824	0.565736	3.42207	0.0484546	0.618527
FOXF2	RPAP3	0.710666	4.16797	3.98564	5.7476	1.57772	0.00577723	0.61848
TBX15	NRN1	0.567419	2.33673	4.4528	5.7476	1.93796	0.00937962	0.616826
POU5F1	OSR1	0.768207	4.28616	4.01195	5.7476	1.52968	0.00529676	0.615175
IRF1	LEKR1	0.655907	2.69805	5.02407	0.753952	2.94428	0.0310983	0.613773
HOXC10	ALOX12	-0.583657	3.25038	5.1774	5.7476	1.6557	0.00655695	0.612876
FOXC2	GALM	-0.148086	2.81653	2.32523	5.7476	3.85246	0.0285246	0.612545
HOXC10	ZNF385D	0.500255	3.25038	4.39238	0.61849	3.43764	0.0402825	0.611696
SIX2	TFCP2	-0.23698	3.16677	2.13501	5.7476	3.12078	0.0212078	0.609496
HOXC8	ZNF181	0.559991	2.26323	4.5454	5.7476	1.94588	0.00945881	0.609426
MAF	HRCT1	-0.328242	0.986989	4.71508	0.380143	9.95166	0.105206	0.607965
ATF5	TBCCD1	-0.235193	2.9446	4.89883	5.7476	2.33397	0.0133397	0.607117
SIX2	UNC119B	-0.414616	3.16677	4.7945	5.7476	1.88799	0.0088799	0.606596
TFAP2A	CAMK2G	-0.295432	2.12337	2.90942	5.7476	2.95562	0.0195562	0.60633
ATF5	GPATCH1	0.38045	2.9446	4.47282	5.7476	2.0334	0.010334	0.605182
TFAP2A	TRIM58	0.521301	2.12337	5.18906	0.421309	4.80622	0.0519294	0.603979
TP63	ZNF135	0.740915	3.9174	4.54729	5.7476	1.52224	0.00522241	0.603058
MAF	ADIRF	-0.368233	0.986989	1.53973	5.7476	4.85798	0.0385798	0.602809
HOXC8	EXOSC8	0.64707	2.26323	4.81001	5.7476	1.81816	0.00818156	0.602254
HOXC9	PDE12	0.438128	2.64331	4.64765	5.7476	1.98132	0.00981322	0.6015
FOSL1	STPG2	-0.183393	0.423381	3.68576	5.7476	6.5588	0.0555881	0.599699
MAF	BBOX1	0.671424	0.986989	5.17037	0.535828	4.78446	0.0681827	0.598912
HOXC8	RASGEF1B	-0.202185	2.26323	5.00725	5.7476	2.69013	0.0169013	0.59877
NR3C2	PIGB	-0.50239	3.84273	4.14534	5.7476	1.74522	0.00745218	0.59822
GATA2	ARSI	0.585754	4.25401	5.06589	5.7476	1.53651	0.00536515	0.598101
HOXC8	EVI2A	-0.305513	2.26323	4.04754	3.67108	1.16345	0.0499176	0.596687
NR3C2	SRSF3	-0.255453	3.84273	1.96812	5.7476	2.8659	0.018659	0.5938
RFX7	TYW1	-0.340682	4.4266	3.35919	5.7476	2.01144	0.0101144	0.592357
TFAP2A	LAT2	0.620203	2.12337	5.14929	0.69776	2.15403	0.0580487	0.591641
HOXC9	BMPR1B	-0.491492	2.64331	2.09524	5.7476	2.50782	0.0150782	0.591603
SIX2	SLC25A18	0.787792	3.16677	5.19079	5.7476	1.52156	0.0052156	0.590665
NFE2	ZBTB46	0.823017	4.25408	4.83178	5.50872	1.43952	0.00439879	0.590097
PITX2	ERG	0.33854	2.98482	4.76887	1.16939	2.4621	0.0425307	0.590082
MAF	ACTR3	0.37329	0.986989	4.66388	5.7476	2.99466	0.0199466	0.58994
SIX2	ECT2L	0.176594	3.16677	5.13699	5.7476	2.45496	0.0145496	0.589771
RUNX3	TRIM24	-0.424711	4.16478	4.19807	5.7476	1.77707	0.00777068	0.589364
HOXC8	VKORC1	0.564406	2.26323	3.83026	5.7476	2.02983	0.0102983	0.587839
NFE2L2	SNIP1	0.328973	2.67598	4.13704	5.7476	2.24875	0.0124875	0.58781
MXD1	AKAP8	-0.363521	3.33877	3.17027	5.7476	2.20328	0.0120328	0.58632
MAFG	PLEKHA7	0.504115	0.718613	5.09831	5.7476	2.89788	0.0189788	0.583827
NFE2	WIZ	0.457471	4.25408	4.42678	1.49701	2.09388	0.0216185	0.583794
SIX2	PNPT1	-0.328928	3.16677	4.29147	3.82957	1.47314	0.0231336	0.583394
TEAD1	FGF1	-0.3417	4.4925	4.16888	2.87331	1.58795	0.0199658	0.582986
NR3C2	HNRNPR	-0.417752	3.84273	2.92925	5.7476	2.05028	0.0105028	0.581994
HOXC10	NFATC2	-0.261104	3.25038	3.47258	2.3571	3.43004	0.02442	0.581865
PITX2	SYT14	0.597988	2.98482	1.43871	0.850701	2.61861	0.101694	0.581736
MAF	DNHD1	0.109269	0.986989	3.87629	5.7476	5.44378	0.0444378	0.581254
HOXC8	ZNF135	0.685489	2.26323	4.54729	5.7476	1.79694	0.00796936	0.580663
NR3C2	WIPI1	0.192291	3.84273	2.65689	5.7476	2.82233	0.0182233	0.580353
NR3C2	RGS22	-0.109097	3.84273	5.04608	5.7476	2.74025	0.0174025	0.579823
DLX2	SMOC2	-0.179934	4.05641	4.37906	5.7476	2.34491	0.0134491	0.579355
PITX2	KIF9	-0.323338	2.98482	4.56016	5.7476	2.09311	0.0109311	0.578756
DLX2	ENKUR	-0.429608	4.05641	3.96618	5.7476	1.80299	0.0080299	0.575144
MXD1	ANP32E	-0.505975	3.33877	3.68479	5.7476	1.86264	0.0086264	0.574874
STAT4	PJA1	0.375639	3.47527	5.0345	5.7476	1.83008	0.00830083	0.573845
TFAP2A	MEIS3	0.721589	2.12337	1.82075	0.771767	4.55531	0.0584497	0.573262
HOXC8	RTN3	-0.540758	2.26323	3.32706	5.7476	2.14295	0.0114295	0.57322
FOSL1	LEKR1	0.265156	0.423381	5.02407	5.7476	4.73217	0.0373217	0.57253
HOXC8	CBX6	-0.545571	2.26323	2.10438	5.7476	2.51969	0.0151969	0.571865
NR3C2	RNF149	0.397486	3.84273	2.95781	5.7476	2.06558	0.0106558	0.571542
MAF	RNF149	0.384313	0.986989	2.95781	5.7476	3.51753	0.0251753	0.57104
NR3C2	TTC26	-0.294891	3.84273	3.85733	5.7476	2.08816	0.0108816	0.570865
HOXA1	EMX2	0.76504	4.38104	3.77603	0.723083	2.41073	0.0258562	0.570422
IRF1	TPMT	-0.655417	2.69805	4.56491	5.7476	1.71625	0.00716248	0.570335
RUNX3	TAF8	0.598343	4.16478	4.66279	5.7476	1.55032	0.00550317	0.569782
NFE2	FAM71F1	0.594155	4.25408	4.92578	0.407908	3.58683	0.0312467	0.569191
FOXC2	ALDH4A1	0.309993	2.81653	4.74767	5.7476	2.12432	0.0112432	0.569044
NR3C2	SH3D21	0.36634	3.84273	4.90446	5.7476	1.79666	0.00796662	0.567993
DLX1	STK10	0.526965	4.05794	2.06699	5.7476	2.07486	0.0107486	0.56657
NR3C2	FABP5	0.502939	3.84273	4.64893	5.7476	1.65947	0.0065947	0.565144
FOXC2	OSMR	-0.159021	2.81653	2.11453	5.7476	3.76015	0.0276015	0.564949
FOXF2	ARID1B	-0.703379	4.16797	2.90936	5.7476	1.68404	0.00684044	0.564723
NR3C1	METTL8	0.694741	4.27086	3.22638	5.7476	1.62967	0.00629675	0.564621
FOXC2	USP42	0.523068	2.81653	3.76597	5.7476	1.92042	0.00920418	0.563659
STAT4	PPP1R42	-0.333984	3.47527	4.87765	5.7476	1.90701	0.00907014	0.562833
IRF1	ALDH3B1	0.881911	2.69805	3.7583	5.7476	1.65909	0.00659092	0.562042
EGR3	HOXC11	-0.247201	3.83046	4.958	5.7476	2.02635	0.0102635	0.561187
IRF1	TMEM140	0.860708	2.69805	4.3893	3.49653	1.32766	0.0118484	0.560643
TFAP2A	FANCC	-0.510857	2.12337	3.60264	1.56996	1.38433	0.0656988	0.557997
ERG	LDB3	-0.22033	4.07346	3.83296	1.36173	2.25899	0.0526619	0.55728
SIX2	C3orf80	0.547399	3.16677	5.17889	5.7476	1.65275	0.00652754	0.556674
HOXC10	ESR1	0.484825	3.25038	2.83238	0.421368	5.19255	0.056925	0.555925
HOXC8	ARHGAP11A	0.461463	2.26323	4.85795	5.7476	1.96779	0.00967794	0.555353
NFE2	TRAF3IP1	0.544874	4.25408	4.03706	5.7476	1.63246	0.00632464	0.555308
TP63	BDKRB1	0.237229	3.9174	4.44481	0.76715	4.28115	0.0409024	0.554892
FOXP2	ZNF552	-0.423333	3.46938	4.9304	5.7476	1.75572	0.00755716	0.552225
EGR3	XG	0.669872	3.83046	2.82534	1.51943	1.20242	0.0415871	0.550817
PITX2	FAM71F2	-0.239355	2.98482	4.7398	5.7476	2.25455	0.0125455	0.550495
FOSL2	HDHD3	0.424321	1.4838	3.88027	5.7476	2.54211	0.0154211	0.550463
HOXC6	EMX2	0.359523	1.82263	3.77603	1.31243	1.25629	0.134495	0.5487
TFAP2A	PRDM16	0.556213	2.12337	2.63743	0.470375	1.3726	0.272382	0.547792
HOXC6	ZNF3	0.522849	1.82263	4.3332	5.7476	2.09742	0.0109742	0.546301
ERG	RAP1GAP2	0.330518	4.07346	4.96665	5.7476	1.79208	0.00792078	0.545548
TFAP2A	PDE4C	0.168773	2.12337	5.17374	5.7476	2.81656	0.0181656	0.54524
NR3C2	UQCRB	-0.321714	3.84273	3.44383	5.7476	2.07404	0.0107404	0.545098
DLX2	RASSF9	0.810275	4.05641	3.68621	0.376707	3.74671	0.0318627	0.544868
ETV3	MFGE8	0.422392	3.87463	5.58551	5.7476	1.63428	0.00634276	0.544626
TEAD4	DOK5	-0.265353	3.87881	1.90159	0.882313	4.47859	0.0703944	0.54443
NFE2	LRRC17	0.363777	4.25408	4.40254	5.7476	1.77924	0.00779243	0.542924
NR3C2	SNIP1	0.301497	3.84273	4.13704	0.451444	4.10357	0.0610385	0.541978
TFAP2A	CLPTM1	0.134234	2.12337	4.00834	5.7476	3.41553	0.0241553	0.541761
RFX2	DLEU7	0.155901	1.13504	5.15585	5.7476	3.75261	0.0275261	0.541659
FOXC2	WDR66	0.312018	2.81653	4.14808	5.7476	2.18304	0.0118304	0.541114
ATF5	ALDH4A1	0.41373	2.9446	4.74767	5.7476	1.86961	0.00869614	0.540492
FOSL1	LIFR	0.388124	0.423381	2.38689	5.7476	5.42102	0.0442102	0.540288
NR3C2	FAM180A	0.466743	3.84273	1.16422	0.937197	1.17677	0.234087	0.539075
HOXD8	APOBEC3F	-0.41426	3.8552	4.77837	5.7476	1.71543	0.0071543	0.538302
HOXC10	BMPR1B	-0.548799	3.25038	2.09524	1.40931	3.71972	0.0274462	0.537752
TBX15	TTC9	0.343973	2.33673	4.60359	5.7476	2.1649	0.011649	0.536339
TEAD1	EMX2	0.471895	4.4925	3.77603	1.47184	1.02304	0.0444911	0.536282
CREB3	LIFR	0.510164	2.15835	2.38689	5.7476	2.44922	0.0144922	0.536187
SIX2	NMNAT1	-0.428863	3.16677	4.78197	5.7476	1.7967	0.00796704	0.53432
TP63	SERPINA3	0.101657	3.9174	5.01166	5.7476	2.7127	0.017127	0.532949
TFAP2A	MAPK8IP1	0.516864	2.12337	4.69845	5.7476	1.9295	0.00929504	0.531545
TFAP2A	APH1B	0.626948	2.12337	4.32861	5.7476	1.85929	0.00859287	0.529148
NR3C2	PLEKHG6	0.410529	3.84273	5.12841	0.940592	1.7085	0.0406636	0.528676
HOXC8	U2AF2	0.671031	2.26323	3.89613	5.7476	1.84305	0.00843045	0.528419
FOXC2	TRAPPC10	0.473017	2.81653	2.29455	5.7476	2.30401	0.0130401	0.527884
IRF1	POLR3B	-0.409296	2.69805	4.48032	5.7476	1.94997	0.00949968	0.526768
NR3C2	COMTD1	-0.286348	3.84273	4.97254	5.7476	1.88711	0.00887109	0.526468
SHOX2	PKD1L1	0.280262	3.39409	4.36789	5.7476	2.0662	0.010662	0.526085
TP63	KCTD17	-0.592565	3.9174	4.99747	5.7476	1.51641	0.00516409	0.522132
NFE2	HINT3	-0.195934	4.25408	4.64868	5.7476	2.10964	0.0110964	0.521343
HOXD8	SH3D21	0.326512	3.8552	4.90446	5.7476	1.8104	0.00810397	0.52059
FOXD1	FBXO28	-0.572232	0.54122	1.65097	5.7476	4.73812	0.0373812	0.520514
MAF	FGF1	-0.333044	0.986989	4.16888	1.09286	2.28812	0.151872	0.52042
FOXC2	GPR156	0.676154	2.81653	5.07269	2.13433	1.15894	0.0217707	0.520229
MAF	CCDC180	-0.164506	0.986989	4.83691	5.7476	3.92844	0.0292844	0.519284
ERG	LHX4	-0.255322	4.07346	5.14018	1.52	2.55859	0.0249756	0.519269
RUNX3	HAGHL	-0.462568	4.16478	4.87482	5.7476	1.59979	0.00599786	0.517929
SIX2	ITFG2	0.458048	3.16677	3.31447	5.7476	1.95729	0.00957288	0.517755
SP2	PIAS1	0.541021	3.78819	3.14405	5.7476	1.78339	0.0078339	0.517423
SHOX2	GPATCH1	0.76518	3.39409	4.47282	5.7476	1.51186	0.0051186	0.516675
HOXC6	RASGEF1B	-0.350586	1.82263	5.00725	5.7476	2.24786	0.0124786	0.515843
RUNX3	PAIP1	-0.654556	4.16478	2.24433	5.7476	1.81025	0.0081025	0.515785
NR3C2	ZNF335	-0.189144	3.84273	4.4621	5.7476	2.23237	0.0123237	0.512817
TFAP2A	ZNF181	0.314216	2.12337	4.5454	5.7476	2.28552	0.0128552	0.512126
E2F3	NOX5	0.785825	1.0597	4.50924	0.713365	2.52092	0.0754962	0.509812
PITX2	VKORC1	0.615541	2.98482	3.83026	5.7476	1.72839	0.00728388	0.509207
NR3C2	DEK	-0.479343	3.84273	2.30025	5.7476	2.02987	0.0102987	0.509096
HOXD8	DCT	0.492933	3.8552	5.18581	2.62451	1.39589	0.0141004	0.509075
FOXD1	FOPNL	-0.756963	0.54122	2.21039	5.7476	3.66714	0.0266714	0.50907
ETV3	TAF8	0.399572	3.87463	4.66279	5.7476	1.7137	0.00713704	0.507471
TEAD4	DKK2	0.251057	3.87881	4.82478	0.598063	3.36332	0.0535412	0.506002
PITX2	KCNJ6	-0.454656	2.98482	5.16374	0.931557	3.31014	0.0234123	0.505903
HOXC8	SKA2	-0.626674	2.26323	3.82293	5.7476	1.86867	0.00868667	0.50587
HOXC8	HAS1	0.222979	2.26323	3.01722	0.444935	7.27144	0.102655	0.505703
SIX2	PIGB	-0.144795	3.16677	4.14534	5.7476	2.70878	0.0170878	0.505681
NR3C2	PACSIN2	-0.462679	3.84273	0.835933	5.7476	2.98229	0.0198229	0.505001
FOXD2	FILIP1	0.748462	4.36604	5.05594	0.607469	2.52875	0.019888	0.504758
IRF1	KIAA1143	-0.435099	2.69805	3.2379	5.7476	2.09905	0.0109905	0.503994
ATF5	MXRA5	-0.230619	2.9446	2.25121	5.7476	2.94598	0.0194598	0.503723
NR3C2	COX15	-0.525028	3.84273	3.84659	0.707489	3.03567	0.0302047	0.503439
HOXD8	EPHB3	0.491828	3.8552	4.99495	2.11784	2.1459	0.0116562	0.501709
HOXD8	PDIA4	0.747281	3.8552	2.81916	5.7476	1.65036	0.00650359	0.501035
MAF	FEM1C	0.359994	0.986989	4.13353	5.7476	2.98691	0.0198691	0.500976
PITX2	AKAP7	0.782477	2.98482	4.52009	1.14889	2.05639	0.0200669	0.500496
ELK3	FAP	0.586048	2.04787	1.53786	5.7476	2.72554	0.0172554	0.498906
NFE2	UBR7	0.397537	4.25408	4.50513	5.7476	1.67743	0.00677435	0.497612
HOXC10	PITX2	0.893792	3.25038	3.55676	0.713932	1.04899	0.064101	0.496042
IRF1	CDKL3	-0.344803	2.69805	4.29668	1.34673	2.02368	0.0455266	0.495955
NR3C2	FGF1	-0.175101	3.84273	4.16888	2.51337	1.28684	0.054457	0.494067
HOXC8	TTC26	-0.42744	2.26323	3.85733	5.7476	2.09798	0.0109798	0.49405
PITX2	FGF1	-0.264959	2.98482	4.16888	1.85554	1.35684	0.0594412	0.493404
SIX2	PLCB3	0.482468	3.16677	4.84212	5.7476	1.68758	0.00687578	0.493392
NFE2	APLP1	0.751965	4.25408	4.82105	0.600245	2.72688	0.0195449	0.493372
MEF2A	FMO4	0.566061	2.79734	4.40714	5.7476	1.71571	0.00715713	0.492533
MAF	LRRC17	0.467044	0.986989	4.40254	5.7476	2.61267	0.0161267	0.49146
IRF3	NEFH	0.540768	2.9495	5.1576	5.7476	1.63392	0.00633924	0.489737
ERG	BDKRB1	0.206183	4.07346	4.44481	2.19246	1.64973	0.0362136	0.488975
HOXC8	DOCK10	0.71512	2.26323	2.35865	1.10787	2.16569	0.0532955	0.488144
IRF1	EDARADD	0.568272	2.69805	5.17777	5.7476	1.64849	0.0064849	0.487781
NFE2	SYPL2	0.675005	4.25408	4.2924	0.946993	1.55454	0.0267828	0.485979
TBX15	GDPD5	0.345308	2.33673	4.59436	4.63143	2.25248	0.0125389	0.484927
NR3C1	USP32	-0.552576	4.27086	3.67112	5.7476	1.60595	0.0060595	0.484575
NFE2	PCBP4	0.637336	4.25408	4.71004	5.7476	1.45363	0.00453629	0.483995
ERG	TRDMT1	0.55791	4.07346	4.06805	5.7476	1.57738	0.00577385	0.483953
FOXD1	LYPLA1	-0.694995	0.54122	3.37665	5.7476	3.12179	0.0212179	0.48354
SIX2	HSPA12A	-0.120553	3.16677	3.37449	5.7476	3.10368	0.0210368	0.483443
RFX2	ZNF454	-0.222084	1.13504	5.039	5.7476	3.11702	0.0211702	0.481753
DLX2	FGF1	-0.277415	4.05641	4.16888	2.34877	2.3172	0.0188562	0.481451
DLX1	SERPINB2	0.21722	4.05794	4.7733	5.7476	1.99639	0.00996391	0.481045
RUNX3	TLR1	0.133537	4.16478	5.03819	5.7476	2.29914	0.0129914	0.481034
MAF	RBM45	-0.244178	0.986989	4.4206	5.7476	3.3455	0.023455	0.480489
HOXD8	PLD5	0.323497	3.8552	5.11753	5.7476	1.7486	0.00748603	0.480184
MAF	ZNF552	-0.231093	0.986989	4.9304	5.7476	3.27033	0.0227033	0.479897
RUNX3	MCOLN2	0.55189	4.16478	5.0002	0.822486	2.47122	0.0205382	0.479772
NR3C2	GLRB	0.343021	3.84273	3.83839	0.906328	2.46302	0.042476	0.479741
NFAT5	WDR19	-0.174642	4.18173	2.99321	5.7476	2.51502	0.0151502	0.478728
NFE2	TEX22	0.335047	4.25408	5.10533	5.7476	1.67995	0.00679949	0.477743
MAFG	ABHD12B	0.840907	0.718613	5.15742	5.7476	2.20731	0.0120731	0.477357
HOXC8	CCDC148	0.167339	2.26323	3.06867	5.7476	3.21955	0.0221955	0.477332
NR3C2	COL24A1	0.216502	3.84273	4.08207	1.4438	1.39208	0.0697968	0.476419
NR3C2	DOHH	0.442018	3.84273	4.87091	5.7476	1.61882	0.00618819	0.476363
NR3C1	NRXN2	-0.44984	4.27086	3.11578	0.449144	3.58717	0.0493522	0.475976
ERG	FBXO16	-0.273225	4.07346	4.71595	1.89359	1.98776	0.0240675	0.47548
HOXC8	MXRA5	-0.266543	2.26323	2.25121	3.26159	3.80822	0.0281516	0.474862
TFAP2A	ZNF787	0.267943	2.12337	4.16179	5.7476	2.42978	0.0142978	0.472793
PITX2	ZNF736	0.697432	2.98482	3.42393	5.7476	1.68427	0.00684273	0.472143
HOXC10	EXOSC8	0.457708	3.25038	4.81001	5.7476	1.68207	0.00682075	0.471881
SIX2	C18orf25	-0.531162	3.16677	4.04553	5.7476	1.70305	0.00703055	0.468298
NR3C2	POLR2J3	0.569059	3.84273	1.75805	5.7476	2.03906	0.0103906	0.468146
FOXD1	ECT2L	0.522263	0.54122	5.13699	5.7476	2.9185	0.019185	0.467282
FOXC2	MXRA5	-0.203551	2.81653	2.25121	5.7476	3.05687	0.0205687	0.466417
ATF5	OXTR	0.223102	2.9446	2.61448	5.7476	2.73012	0.0173012	0.466293
HOXD8	PRSS12	0.74955	3.8552	1.07392	5.7476	2.19238	0.0119238	0.466271
MAF	TRIM9	0.214172	0.986989	5.14812	5.7476	3.27473	0.0227473	0.465923
ETV3	FAP	0.383816	3.87463	1.53786	5.7476	2.44608	0.0144608	0.464964
FOSL2	NR4A2	-0.551058	1.4838	2.91315	5.7476	2.40894	0.0140894	0.464666
NFKB1	MCMDC2	0.744845	2.30791	5.04286	5.7476	1.58706	0.00587059	0.464218
SIX2	PUS3	-0.514861	3.16677	4.82134	0.923292	1.98582	0.0321779	0.463778
TEAD4	DDX43	0.50137	3.87881	4.09608	0.69964	1.94169	0.0428253	0.463426
SIX2	HIVEP3	0.619847	3.16677	2.05704	1.24168	3.4013	0.0271643	0.463229
NR3C2	DET1	-0.116513	3.84273	4.59894	0.460865	4.71628	0.103358	0.462581
FOXC2	TEK	0.408341	2.81653	3.53916	0.451509	4.10555	0.0611733	0.461569
NR3C2	UROS	-0.357064	3.84273	3.62655	5.7476	1.86472	0.00864718	0.461161
TEAD4	HAUS8	0.825701	3.87881	5.08905	5.7476	1.36141	0.00361413	0.460933
FOXD2	HOXC11	-0.147788	4.36604	4.958	5.7476	2.15983	0.0115983	0.460609
MAF	SSC5D	-0.210611	0.986989	0.827712	5.7476	7.34122	0.0634122	0.460364
TFAP2A	DAB2IP	-0.41883	2.12337	4.38455	0.968588	2.48652	0.0488482	0.458743
ERG	APLN	0.30063	4.07346	4.70705	1.01272	3.32891	0.0235837	0.458302
FOSL2	SNIP1	0.294834	1.4838	4.13704	5.7476	2.65649	0.0165649	0.457746
HOXC9	TTC26	-0.296797	2.64331	3.85733	5.7476	2.19638	0.0119638	0.457041
FOSL2	FEM1C	0.495675	1.4838	4.13353	5.7476	2.19168	0.0119168	0.456371
IRF1	TRMT1L	0.560562	2.69805	3.40223	5.7476	1.83891	0.00838915	0.45625
HOXC8	PACS1	-0.462253	2.26323	5.19814	5.7476	1.80523	0.00805232	0.454357
NFKB1	CSF1R	-0.278942	2.30791	5.05211	5.7476	2.136	0.01136	0.453599
IRF1	HNRNPR	-0.301781	2.69805	2.92925	5.7476	2.3856	0.013856	0.453125
SIX2	TMX1	0.268953	3.16677	3.04928	5.7476	2.31187	0.0131187	0.452722
NR3C2	PDK4	0.815462	3.84273	4.73405	0.915627	1.29839	0.0256503	0.452367
FLI1	NOP14	0.860146	1.09686	4.29297	5.7476	1.98081	0.00980813	0.452269
FOSL1	HYI	0.748428	0.423381	3.62666	5.7476	3.16034	0.0216034	0.450954
IRF1	TRAF3IP1	0.63207	2.69805	4.03706	5.7476	1.6757	0.006757	0.44804
HOXC6	PLD5	0.385734	1.82263	5.11753	5.7476	2.05374	0.0105374	0.447519
FOSL1	IPCEF1	-0.253947	0.423381	4.77173	5.7476	4.42666	0.0342666	0.447285
NFE2	GABRB3	0.338439	4.25408	5.16892	5.7476	1.638	0.00638004	0.447003
DLX2	ZNF3	0.334647	4.05641	4.3332	5.7476	1.7535	0.00753502	0.4467
TEAD4	BCL7A	0.462303	3.87881	4.10283	5.7476	1.64284	0.00642837	0.446571
NFE2	JPH2	0.727269	4.25408	4.25678	0.450805	2.41126	0.0311871	0.446469
NR3C2	NDST2	0.658023	3.84273	3.93054	0.854987	1.83351	0.028573	0.445176
HOXC10	CCDC28A	-0.528448	3.25038	4.24433	5.7476	1.64543	0.00645435	0.445006
TFAP2A	TMPRSS9	-0.211282	2.12337	5.13922	5.7476	2.39926	0.0139926	0.444885
MSC	TPMT	-0.366398	3.34675	4.56491	5.7476	1.77698	0.00776981	0.444209
PITX2	GALNT3	0.571211	2.98482	4.90815	0.715234	3.24033	0.0227626	0.441461
FOSL2	CLPB	-0.525857	1.4838	3.91027	5.7476	2.16273	0.0116273	0.440978
HOXD8	ZNF3	0.391594	3.8552	4.3332	5.7476	1.69238	0.00692385	0.44058
MAF	PREP	-0.312917	0.986989	3.09787	5.7476	3.37309	0.0237309	0.440185
TEAD4	PADI2	0.53579	3.87881	4.37575	2.92867	1.87584	0.00880195	0.439734
SHOX2	TAZ	-0.512001	3.39409	4.25574	5.7476	1.63307	0.0063307	0.439453
RUNX3	GGPS1	-0.495783	4.16478	4.71837	5.62266	1.52428	0.00524597	0.438033
FOXF2	MICU1	-0.342462	4.16797	2.30558	5.7476	2.10112	0.0110112	0.437611
MEF2A	CAMTA2	0.679491	2.79734	3.54795	5.7476	1.67378	0.00673783	0.437131
RFX7	TTI2	-0.557926	4.4266	4.74447	5.7476	1.44806	0.00448056	0.436957
NR3C2	ZNF730	-0.198711	3.84273	4.8599	5.7476	2.01499	0.0101499	0.436223
HOXC6	FGF1	-0.196585	1.82263	4.16888	1.91014	3.26857	0.0467534	0.436019
HOXC8	PRSS12	0.55695	2.26323	1.07392	5.7476	2.91932	0.0191932	0.435945
HOXC10	FRMD6	0.646804	3.25038	2.32887	2.05049	1.72847	0.0250838	0.435276
SHOX2	IPO13	0.807395	3.39409	4.59841	5.7476	1.42228	0.00422278	0.434997
FOXP2	HOXC11	-0.143963	3.46938	4.958	5.7476	2.31546	0.0131546	0.43352
FOXD2	TRIM24	-0.649732	4.36604	4.19807	5.7476	1.43944	0.00439441	0.432965
ERG	KCNK1	0.194011	4.07346	4.00633	5.7476	2.12125	0.0112125	0.432832
NFE2	ALKBH3	0.474633	4.25408	4.46866	5.7476	1.54139	0.00541385	0.432758
SIX2	MOB3C	0.615179	3.16677	5.10055	5.7476	1.5038	0.00503796	0.432677
HOXC8	MPP4	0.522583	2.26323	5.11388	2.75499	1.0235	0.0253491	0.432321
RFX2	SCNN1A	0.853564	1.13504	5.17085	5.7476	1.82248	0.00822476	0.431601
HOXC8	LHX4	-0.512468	2.26323	5.14018	1.06813	2.47158	0.0273516	0.430483
SIX2	JPH2	0.100116	3.16677	4.25678	5.7476	2.90795	0.0190795	0.43037
TFAP2A	TOR1AIP2	0.620327	2.12337	3.15239	5.7476	1.9318	0.00931802	0.429595
TFAP2A	RIPK1	0.492836	2.12337	2.1602	1.84042	2.36293	0.0436069	0.428691
HOXC8	NECAP1	0.825221	2.26323	4.33536	5.7476	1.58132	0.0058132	0.427804
NR3C2	DNMT3A	-0.21028	3.84273	4.03567	1.967	1.92279	0.0345027	0.425543
NR3C1	ZNF423	0.248817	4.27086	0.913097	2.18166	2.85391	0.0704159	0.425412
ERG	ATF6	-0.335673	4.07346	3.72264	5.7476	1.80444	0.00804444	0.424675
DLX2	ZNF181	0.519327	4.05641	4.5454	5.7476	1.51057	0.00510567	0.424457
HOXC8	CDC42EP5	0.698614	2.26323	2.89156	5.7476	1.86569	0.00865695	0.424415
HOXC10	KCNJ10	-0.250234	3.25038	4.94806	5.7476	1.94353	0.00943529	0.424178
SIX2	MRPS22	0.505753	3.16677	4.41442	0.932932	1.72985	0.0371573	0.423966
MEF2C	ANKRD17	0.541181	3.40711	5.84839	5.7476	1.46612	0.00466121	0.423563
TFAP2A	ARHGAP39	0.386159	2.12337	5.06177	5.7476	1.92241	0.00922409	0.42301
NR3C2	PIK3CD	-0.320935	3.84273	4.75319	1.88478	1.57709	0.0242649	0.422803
MAF	ZNF181	0.292283	0.986989	4.5454	5.7476	2.91956	0.0191956	0.422372
NR3C2	ERN1	0.485334	3.84273	4.05612	5.7476	1.60475	0.00604746	0.421947
SIX2	PEF1	-0.27707	3.16677	4.48191	5.7476	1.95472	0.00954717	0.421808
RUNX3	TMEM120B	0.903073	4.16478	3.79346	5.7476	1.37349	0.00373487	0.420664
HOXC10	AAMDC	-0.268539	3.25038	1.6645	5.7476	2.79932	0.0179932	0.420604
HOXC8	NTF3	-0.167434	2.26323	2.65492	0.466629	4.73216	0.1892	0.420316
HOXC8	GFM2	0.827823	2.26323	4.27901	0.885712	2.34756	0.0250885	0.41821
DLX2	RABEP2	0.621266	4.05641	4.40353	5.7476	1.45147	0.00451468	0.417966
HOXD8	ZNF736	0.794476	3.8552	3.42393	5.7476	1.4709	0.00470896	0.41749
HOXC8	PRKACB	0.592241	2.26323	2.88404	1.34834	1.99945	0.0400417	0.417303
NR3C2	TAF9B	-0.514046	3.84273	4.99732	5.7476	1.49236	0.00492361	0.416892
RFX5	C20orf197	0.561388	4.17904	5.16988	5.7476	1.42038	0.00420444	0.416312
HOXC9	STEAP1	0.484895	2.64331	3.76128	5.7476	1.82361	0.00823609	0.41617
NFE2	DIXDC1	0.663394	4.25408	1.74341	0.709024	3.61993	0.0328997	0.415462
NR3C2	PENK	-0.177175	3.84273	0.824118	3.11145	1.87112	0.127174	0.415426
NR3C2	MAGEH1	-0.213455	3.84273	4.75705	5.7476	1.94978	0.00949781	0.415317
NR3C2	SMARCE1	-0.405593	3.84273	1.59706	5.7476	2.27328	0.0127328	0.414106
ERG	RAB33A	-0.293236	4.07346	5.04412	1.73973	1.41545	0.0278898	0.413797
RUNX3	ETV3	0.799946	4.16478	4.59818	5.7476	1.34839	0.00348395	0.413631
SIX2	CLEC2B	0.657698	3.16677	5.14262	5.7476	1.45956	0.00459564	0.412935
SIX2	CTC1	-0.471067	3.16677	4.92245	5.7476	1.60776	0.00607759	0.4124
MAF	MAPK7	0.62345	0.986989	4.99067	5.7476	2.10789	0.0110789	0.412195
TEAD4	DNAJC25	0.437321	3.87881	4.35897	5.7476	1.60435	0.0060435	0.412057
TFAP2A	IPO13	0.390013	2.12337	4.59841	5.7476	1.9593	0.00959301	0.411391
NR3C2	TMEM186	0.282101	3.84273	5.08222	5.7476	1.74429	0.00744288	0.411096
NFE2	WDR66	0.444844	4.25408	4.14808	5.7476	1.57718	0.00577178	0.410712
HOXD8	FMNL3	-0.394912	3.8552	3.23075	3.63903	1.94815	0.0117714	0.410474
RUNX3	2022-12-01	0.713696	4.16478	2.1757	0.464086	2.28762	0.0597105	0.409957
HOXA1	ZNF385D	0.632047	4.38104	4.39238	5.7476	1.41394	0.00413944	0.409153
SIX2	TMUB1	-0.350337	3.16677	4.3567	5.7476	1.81117	0.00811166	0.408144
TEAD4	RASGEF1B	-0.257945	3.87881	5.00725	5.7476	1.78773	0.00787734	0.405503
MAF	SLC8B1	-0.284294	0.986989	4.64719	5.7476	2.87847	0.0187847	0.405249
MAF	KRT14	0.43074	0.986989	3.92384	0.920288	4.49191	0.0586704	0.404588
HOXC9	ELP6	0.610489	2.64331	4.17296	5.7476	1.63802	0.00638021	0.404494
HOXC10	PIH1D2	0.46417	3.25038	5.04776	5.7476	1.58274	0.00582736	0.403717
HOXC10	SNX19	0.719353	3.25038	1.44611	5.7476	2.02548	0.0102548	0.403663
HOXC10	VGLL3	-0.292953	3.25038	2.80284	5.7476	2.19701	0.0119701	0.403409
ATF5	DLG4	0.545557	2.9446	4.72403	5.7476	1.58322	0.00583222	0.402756
TFAP2A	POLM	0.386461	2.12337	4.62477	0.445179	4.24992	0.0560625	0.40254
RUNX3	MECR	-0.135987	4.16478	4.74077	5.7476	2.19066	0.0119066	0.402519
NFE2L2	PPP1R42	-0.436703	2.67598	4.87765	5.7476	1.71531	0.00715309	0.401977
TFAP2A	TMEM63C	0.441047	2.12337	5.18125	5.7476	1.7999	0.00799899	0.401528
SIX2	FOXO6	0.560934	3.16677	5.09815	5.7476	1.50991	0.00509907	0.400745
HIC1	IRX2	-0.407313	4.21994	4.93716	5.7476	1.53492	0.00534919	0.400471
IRF1	PSG8	0.543538	2.69805	5.18365	5.7476	1.57794	0.00577944	0.398455
IRF1	GGPS1	-0.552085	2.69805	4.71837	2.01823	2.24236	0.0125225	0.398304
PITX2	ZNF3	0.558908	2.98482	4.3332	5.7476	1.59732	0.00597325	0.396422
TFAP2A	PCDHGA2	0.459113	2.12337	5.1309	5.7476	1.77526	0.00775257	0.395669
HOXC10	STK10	0.390955	3.25038	2.06699	0.398629	6.61398	0.0571139	0.395523
HOXC9	TP53RK	0.474002	2.64331	4.49493	3.0152	2.10226	0.0110685	0.395133
NFE2	MAML1	-0.289713	4.25408	4.54445	5.7476	1.71444	0.00714436	0.394299
FOXD1	AXDND1	0.250071	0.54122	5.16057	5.7476	3.67297	0.0267296	0.394122
NR3C2	FAM107B	-0.334786	3.84273	0.935942	5.00988	1.64029	0.039806	0.39387
RUNX3	WDR66	0.890911	4.16478	4.14808	5.7476	1.3337	0.00333696	0.393701
TFAP2A	CPXM2	0.133437	2.12337	3.59513	0.78958	3.81549	0.12805	0.392956
HOXC10	ARL2BP	0.800883	3.25038	2.53423	5.7476	1.63417	0.00634169	0.39295
HOXC10	AKAP7	0.777282	3.25038	4.52009	0.456768	2.20274	0.0341119	0.391944
FOXD1	MARVELD2	-0.536057	0.54122	3.34115	5.7476	3.19874	0.0219874	0.39185
HOXC8	ADAMTSL1	0.501035	2.26323	2.63564	0.879465	3.07656	0.0483815	0.391243
HOXC6	LMO2	0.440736	1.82263	4.85088	0.806519	3.30593	0.0376484	0.391158
HOXC8	SLC22A4	0.548039	2.26323	5.08029	1.40509	1.67428	0.0263868	0.391155
HOXC6	PDE12	0.4709	1.82263	4.64765	5.7476	1.89817	0.00898169	0.390877
TFAP2A	PAF1	0.253089	2.12337	4.26527	5.7476	2.29357	0.0129357	0.390871
PITX2	TRDMT1	0.568804	2.98482	4.06805	5.7476	1.61073	0.00610728	0.390502
FOXC2	DEK	-0.111041	2.81653	2.30025	5.7476	3.61332	0.0261332	0.390444
RUNX3	ABCC4	-0.470163	4.16478	1.41623	5.7476	2.14275	0.0114275	0.390285
DLX2	DEK	-0.358776	4.05641	2.30025	5.7476	2.00775	0.0100775	0.389305
POU5F1	IGFBP1	0.60671	4.28616	5.05334	5.7476	1.3745	0.00374501	0.388787
MAF	HDAC1	-0.533463	0.986989	3.98987	5.7476	2.36239	0.0136239	0.388613
MAF	FMO4	0.450498	0.986989	4.40714	5.7476	2.42008	0.0142008	0.387069
SIX4	COL13A1	0.359491	3.82692	3.89913	5.7476	1.72622	0.00726217	0.386503
PITX2	METTL8	0.608788	2.98482	3.22638	5.7476	1.68192	0.00681915	0.386475
FOXF2	RND3	0.666597	4.16797	1.95641	5.7476	1.71884	0.00718839	0.386012
SIX2	IL18BP	0.619904	3.16677	5.12673	5.7476	1.45683	0.00456833	0.384977
NR3C2	TMEM63C	0.434369	3.84273	5.18125	5.7476	1.51185	0.00511855	0.384659
NR3C2	NFRKB	0.476192	3.84273	4.19614	0.442213	3.10074	0.0364338	0.383596
NR3C2	THSD1	0.501441	3.84273	4.72274	0.864306	1.6311	0.0298941	0.383519
RUNX3	PRRT3	0.665854	4.16478	4.76421	0.390709	2.97041	0.0250057	0.383416
FOSL2	AMPD3	0.464862	1.4838	4.3751	5.7476	2.06737	0.0106737	0.382741
SIX2	HEG1	0.623796	3.16677	1.23316	5.7476	2.22714	0.0122714	0.382653
NR3C2	STEAP4	0.663459	3.84273	2.63362	0.743088	1.5655	0.0489298	0.382185
HOXC6	ESR1	0.409218	1.82263	2.83238	1.77445	1.21219	0.0840313	0.38184
HIC1	OLFML1	0.741917	4.21994	3.19089	5.7476	1.45643	0.00456425	0.381697
ELK3	GPR1	-0.578296	2.04787	1.49498	5.7476	2.49984	0.0149984	0.381532
HOXC8	CTIF	-0.380795	2.26323	1.85219	5.7476	2.59945	0.0159945	0.381457
HOXB7	AP5B1	0.902602	1.85807	4.91592	5.7476	1.52698	0.00526977	0.381306
EGR3	STEAP4	0.976455	3.83046	2.63362	0.736136	1.88319	0.0279134	0.381171
ETV3	IFIT1	0.185946	3.87463	4.79469	5.7476	1.97237	0.00972365	0.380786
RUNX3	SLX4IP	-0.309075	4.16478	2.06931	1.70462	2.68372	0.0312437	0.380722
RFX7	HOXC4	-0.307674	4.4266	4.40821	0.616119	3.55543	0.0289384	0.380588
FOSL2	NDC1	-0.750262	1.4838	4.83247	5.7476	1.71644	0.00716441	0.380235
NR3C2	WDHD1	-0.480635	3.84273	4.77287	5.7476	1.49984	0.00499841	0.379838
FOXD1	NOP14	0.411546	0.54122	4.29297	5.7476	3.17452	0.0217452	0.379383
NFE2	NR2F6	0.749579	4.25408	3.65217	3.19009	1.62506	0.00628177	0.379252
NR3C2	ZNF736	0.239207	3.84273	3.42393	5.7476	2.03135	0.0103135	0.378979
IRF1	DOK5	-0.172553	2.69805	1.90159	0.933334	4.79331	0.0955829	0.378566
TFAP2A	FAM71F1	0.259255	2.12337	4.92578	0.553682	4.94342	0.0509937	0.378472
MAF	CHRDL1	-0.152781	0.986989	3.98756	5.7476	3.84248	0.0284248	0.377472
RUNX3	SC5D	-0.59066	4.16478	3.40277	5.7476	1.51699	0.00516995	0.377328
ETS1	DKK2	0.532463	0.970625	4.82478	0.895361	3.88702	0.0434751	0.37729
TEAD4	FOXF2	0.596547	3.87881	4.90678	0.77798	1.15429	0.0369284	0.376517
RFX7	PCDHB13	-0.616504	4.4266	5.13686	5.7476	1.34676	0.00346764	0.376284
ERG	BNC1	0.233285	4.07346	4.48018	1.15788	1.4934	0.0510304	0.375676
RUNX3	FOXF2	0.670883	4.16478	4.90678	0.783852	1.4527	0.0240355	0.375232
HOXA1	ESR1	0.49746	4.38104	2.83238	5.7476	1.64348	0.00643479	0.375207
ERG	MORN1	-0.333351	4.07346	4.39763	2.57238	1.52156	0.0160476	0.375075
NFE2	NOP14	0.476588	4.25408	4.29297	5.7476	1.49828	0.00498279	0.373472
HOXB2	PLEKHG2	0.528063	3.33247	3.67168	5.7476	1.62034	0.00620337	0.373281
IRF1	VPS18	0.869032	2.69805	4.769	5.7476	1.41114	0.00411142	0.372874
ERG	ZNF135	0.296227	4.07346	4.54729	5.7476	1.69662	0.00696621	0.372742
TP63	KLKB1	0.137072	3.9174	3.82714	5.7476	2.34507	0.0134507	0.372571
PITX2	ELP6	0.319532	2.98482	4.17296	5.7476	1.8701	0.00870103	0.37222
HOXC10	BIVM	0.563991	3.25038	3.73336	3.42635	1.34122	0.011832	0.372131
HOXD8	SDC1	0.373136	3.8552	4.78132	3.50274	1.83709	0.00839889	0.371726
FOXD1	TRIM24	-0.508717	0.54122	4.19807	5.7476	2.91662	0.0191662	0.371364
HOXC8	PABPC4L	0.715133	2.26323	5.16223	0.432433	3.12479	0.0328606	0.370996
RUNX3	YWHAB	0.553003	4.16478	4.39308	1.32192	1.78849	0.0154803	0.370305
HOXC10	FEM1B	-0.301189	3.25038	1.84235	5.7476	2.45473	0.0145473	0.370183
MEIS3	SIM1	0.864792	1.0679	4.11539	0.504549	4.04122	0.0476603	0.369341
IRF1	PRKACA	0.839608	2.69805	3.69414	5.7476	1.50871	0.00508708	0.369149
FLI1	SIM1	0.851028	1.09686	4.11539	0.564228	2.3866	0.0712712	0.368684
IRF1	SERPINB8	-0.420491	2.69805	3.22823	5.7476	1.91451	0.00914507	0.368555
ERG	SIRT5	-0.348563	4.07346	4.58921	5.7476	1.61088	0.00610881	0.368543
FOSL2	ZBTB17	0.58895	1.4838	4.74767	5.7476	1.8395	0.00839497	0.368246
NR3C2	KRI1	-0.142645	3.84273	4.8115	5.7476	2.13617	0.0113617	0.367911
HOXC8	THAP1	0.772782	2.26323	4.99744	5.7476	1.491	0.00491004	0.367777
FOXF2	METTL16	-0.718969	4.16797	2.89486	5.7476	1.49374	0.00493737	0.367721
TEAD4	ZNF561	-0.649894	3.87881	3.86291	5.7476	1.45229	0.00452287	0.367629
CREB3	IRF1	0.793922	2.15835	3.42948	5.7476	1.65634	0.00656345	0.367196
TFAP2A	PLEKHG1	0.254099	2.12337	4.02114	0.459998	4.22804	0.0869952	0.367087
MAF	ISY1	-0.502726	0.986989	3.66697	5.7476	2.4376	0.014376	0.366471
NR3C1	NAP1L3	-0.306299	4.27086	4.10779	5.7476	1.69799	0.00697993	0.366052
NFE2	PRKACA	0.632002	4.25408	3.69414	5.7476	1.44376	0.00443761	0.365738
RFX7	ZNF181	0.467445	4.4266	4.5454	5.7476	1.46215	0.00462147	0.365284
HOXC8	ARL2BP	0.807327	2.26323	2.53423	5.7476	1.7726	0.00772602	0.364483
DLX2	PLEKHG6	0.541123	4.05641	5.12841	3.40504	1.59267	0.00595285	0.363409
FOXD1	PABPC5	0.391747	0.54122	5.02333	5.7476	2.98711	0.0198711	0.363355
RUNX3	SLC26A8	0.369182	4.16478	5.10956	5.7476	1.52684	0.00526841	0.363224
FOXD1	HOXB7	0.899172	0.54122	2.46434	0.901997	3.86434	0.0867472	0.362621
NFIB	TTC26	-0.563568	1.63272	3.85733	5.7476	1.92377	0.00923771	0.362534
HOXC10	ADAMTSL1	0.379375	3.25038	2.63564	0.392613	5.34156	0.0531815	0.362479
FOXO6	TBX15	0.329264	4.3383	2.97704	5.7476	1.81554	0.00815539	0.361897
HOXC10	PTRH2	0.322315	3.25038	4.06623	5.7476	1.81449	0.00814491	0.361855
TEAD1	GK5	-0.359224	4.4925	2.74906	5.7476	1.78882	0.0078882	0.359806
DLX1	MMP19	0.628574	4.05794	4.13806	5.7476	1.4178	0.004178	0.359358
HOXC8	ARL3	0.659589	2.26323	0.568302	5.7476	3.2604	0.022604	0.359355
SIX2	CDC37L1	-0.372585	3.16677	3.41101	5.7476	1.84271	0.00842714	0.359211
TFAP2A	GREB1L	0.246913	2.12337	3.62932	5.7476	2.3797	0.013797	0.359078
TEAD1	RASSF9	0.442413	4.4925	3.68621	3.38675	1.48336	0.00975247	0.358956
NR3C2	ZNF543	0.297053	3.84273	5.06138	5.7476	1.65298	0.00652978	0.358422
TEAD4	FICD	-0.552205	3.87881	4.43625	1.34419	1.43549	0.019514	0.357786
NR3C2	EPHB3	0.605935	3.84273	4.99495	0.785694	1.01048	0.0386418	0.35681
TEAD1	CCL28	-0.329499	4.4925	4.72762	5.7476	1.56519	0.00565193	0.355824
TBX15	TPMT	-0.600493	2.33673	4.56491	5.7476	1.60239	0.00602395	0.355373
IRF1	DLEU7	0.685929	2.69805	5.15585	5.7476	1.44755	0.00447548	0.355295
ATF5	ZNF329	0.360676	2.9446	4.68007	5.7476	1.72113	0.00721128	0.354575
TEAD4	GDF6	0.353218	3.87881	3.29897	0.959995	1.24408	0.0656663	0.35447
HOXC6	PLEKHG2	0.372427	1.82263	3.67168	5.7476	2.14704	0.0114704	0.352784
SIX2	GAS1	-0.416724	3.16677	0.588198	5.7476	3.35463	0.0235463	0.352406
PITX2	TRAM1L1	0.612955	2.98482	5.00795	0.435257	2.89367	0.0305379	0.352404
E2F3	IRX2	-0.275583	1.0597	4.93716	5.7476	2.62136	0.0162136	0.352215
SIX2	UBN2	-0.16148	3.16677	0.985047	5.7476	4.02179	0.0302179	0.351853
NR3C2	CALCOCO1	0.572723	3.84273	2.09998	5.7476	1.7545	0.00754501	0.351642
NFE2	POU3F3	0.459329	4.25408	5.19178	5.7476	1.42345	0.00423452	0.351463
IRF1	IL7R	0.512602	2.69805	4.26165	1.03404	1.34933	0.0427048	0.35119
SHOX2	PUF60	0.819437	3.39409	2.89929	5.7476	1.50374	0.00503745	0.351077
TFAP2A	MMP19	0.155767	2.12337	4.13806	5.7476	2.67089	0.0167089	0.351066
DLX2	POGLUT1	0.260461	4.05641	4.13571	5.7476	1.78256	0.00782561	0.350335
NR3C2	POLE3	-0.297691	3.84273	4.72116	5.7476	1.67323	0.00673234	0.349675
HOXC9	SRFBP1	0.130503	2.64331	3.50536	5.7476	2.79649	0.0179649	0.349161
TEAD1	RAP1GAP2	0.653115	4.4925	4.96665	5.7476	1.3159	0.003159	0.348178
DLX2	PRSS3	0.491375	4.05641	5.1215	5.36739	1.44034	0.00440773	0.347854
MAF	PITPNB	-0.506908	0.986989	2.35318	5.7476	2.81886	0.0181886	0.346942
RUNX3	IL6	0.642747	4.16478	1.25005	0.841431	3.50983	0.0351022	0.346895
ERF	RBM41	-0.646212	3.3439	2.78441	5.7476	1.61897	0.00618974	0.346545
SIX2	CIITA	0.74254	3.16677	5.12311	0.749243	1.15971	0.0330604	0.346058
NFE2	STK19	0.754745	4.25408	4.6256	5.7476	1.30949	0.00309494	0.345953
NR3C2	LDB3	-0.19915	3.84273	3.83296	1.53245	1.10152	0.0698165	0.345696
HOXC10	BEST1	-0.589484	3.25038	5.00611	0.883932	2.0885	0.0195074	0.34543
SIX2	VPS13D	-0.415505	3.16677	1.99145	5.7476	2.09421	0.0109421	0.345117
HOXC10	P4HA2	0.568305	3.25038	1.72368	5.7476	1.96045	0.0096045	0.344579
SIX2	METTL5	-0.49176	3.16677	4.02746	5.7476	1.5977	0.00597703	0.344245
FOSL2	TTI2	-0.426814	1.4838	4.74447	5.7476	1.99659	0.00996585	0.343629
NR3C2	GABRB3	0.321407	3.84273	5.16892	5.7476	1.58923	0.00589228	0.343598
FOXD1	IL18BP	0.628454	0.54122	5.12673	5.7476	2.41676	0.0141676	0.343166
IRF1	OSR1	0.443028	2.69805	4.01195	0.764882	2.86928	0.0325191	0.34225
TFAP2A	CEACAM19	0.189965	2.12337	3.07193	0.629841	5.43958	0.0805796	0.342083
SOX18	PABPC5	0.762644	4.37088	5.02333	5.7476	1.27785	0.00277853	0.341715
IRF1	LEPR	-0.508256	2.69805	1.52257	1.99544	2.53634	0.0323132	0.341457
MSC	WDR19	-0.260016	3.34675	2.99321	5.7476	2.09054	0.0109054	0.341311
TEAD4	PPM1D	-0.527618	3.87881	3.17276	5.7476	1.57892	0.00578916	0.341128
ERG	EMX2	0.125506	4.07346	3.77603	0.77745	1.67378	0.135722	0.340944
RUNX3	NOX5	0.566054	4.16478	4.50924	0.440142	2.80131	0.0259938	0.340704
NR3C2	ACAT2	-0.351101	3.84273	4.24363	5.7476	1.63221	0.00632208	0.339571
HOXC8	KPNA4	0.393362	2.26323	2.81819	5.7476	2.11336	0.0111336	0.339306
RUNX3	ZCCHC8	-0.333976	4.16478	3.38554	5.7476	1.72594	0.00725936	0.339113
FOSL2	GRK6	-0.665572	1.4838	5.03601	5.7476	1.69843	0.00698431	0.339089
RUNX3	XPOT	-0.574059	4.16478	3.98886	0.520685	3.12845	0.0218259	0.339059
NFE2	ZBTB18	0.535509	4.25408	4.688	1.76775	1.49274	0.0120304	0.339038
SIX2	CAPN1	0.638403	3.16677	2.9446	3.35702	1.8927	0.00895914	0.338874
TEAD4	LIFR	0.589353	3.87881	2.38689	5.7476	1.65347	0.00653466	0.338854
PITX2	FAM49B	-0.633651	2.98482	2.04699	5.7476	1.83128	0.00831283	0.338748
IRF1	DAAM2	0.392839	2.69805	0.115963	5.7476	7.4363	0.064363	0.338114
NFE2	AURKC	0.786001	4.25408	5.16356	5.7476	1.26817	0.00268169	0.337483
NR3C2	PYCR2	-0.328434	3.84273	4.34757	0.65223	3.17266	0.0297074	0.337306
IRF1	PGF	-0.649613	2.69805	2.47264	2.32362	1.89505	0.0175973	0.335813
NR3C2	PIGQ	-0.261553	3.84273	4.52955	5.7476	1.73749	0.00737489	0.335288
SIX4	PEX5L	0.239389	3.82692	5.06063	5.7476	1.72782	0.00727818	0.335092
RUNX3	PPP1R9B	0.408377	4.16478	4.45745	5.7476	1.50893	0.00508931	0.334621
ERG	CDKL3	-0.27908	4.07346	4.29668	1.0727	1.93265	0.0330089	0.334262
NFE2	TOR1AIP2	0.725465	4.25408	3.15239	5.7476	1.42031	0.00420306	0.333808
EGR3	LHX9	0.334127	3.83046	4.38051	0.870054	2.5228	0.027085	0.333309
RUNX3	CACNB2	0.410048	4.16478	4.68279	0.914645	2.53305	0.0179483	0.332546
TFAP2A	PLEKHG5	0.411657	2.12337	4.54447	1.51761	1.0246	0.0538033	0.332328
TFAP2A	MADD	0.240868	2.12337	4.56347	5.7476	2.14847	0.0114847	0.331007
NR3C2	TRAPPC10	0.238326	3.84273	2.29455	5.7476	2.22909	0.0122909	0.330907
IRF1	CLDN1	0.437143	2.69805	5.0678	5.7476	1.60137	0.00601368	0.330835
FLI1	NOX5	0.563914	1.09686	4.50924	0.876574	1.96884	0.0686918	0.330653
ERG	SLC22A4	0.383115	4.07346	5.08029	1.16327	1.62471	0.0220461	0.330345
FOSL2	NAP1L3	-0.396229	1.4838	4.10779	5.7476	2.12069	0.0112069	0.329898
HOXB2	DKK2	0.282218	3.33247	4.82478	0.785986	2.92074	0.0316666	0.329867
FOXF2	ERI2	-0.678592	4.16797	4.80656	5.7476	1.31972	0.00319721	0.329691
HOXC8	RHBDD2	-0.484959	2.26323	3.76887	3.09787	1.48742	0.0172882	0.329529
HOXC8	GNG2	0.62916	2.26323	3.82988	0.514443	3.65725	0.0320639	0.328991
TFAP2A	SLC9C1	-0.271468	2.12337	4.92974	0.923816	2.78537	0.0449746	0.328855
TFAP2A	METTL8	0.203005	2.12337	3.22638	5.7476	2.58826	0.0158826	0.328597
POU5F1	BCL2L14	0.671962	4.28616	4.65101	5.7476	1.32258	0.0032258	0.328478
ATF6B	AKAP8L	0.657129	3.39993	1.69218	5.7476	1.82714	0.00827135	0.328399
RUNX3	PCBP1	-0.660734	4.16478	3.6199	5.7476	1.40683	0.00406835	0.327689
HOXC10	GZF1	0.518867	3.25038	4.88384	5.7476	1.47048	0.00470478	0.327519
HOXC10	AAAS	0.58415	3.25038	4.29496	5.7476	1.47317	0.00473174	0.326723
SIX2	RTN2	-0.409701	3.16677	4.86727	5.7476	1.57235	0.0057235	0.326637
TEAD4	GGPS1	-0.549791	3.87881	4.71837	5.7476	1.40169	0.00401691	0.325625
HOXC8	GATAD2B	-0.394265	2.26323	2.38158	5.7476	2.20731	0.0120731	0.3255
VDR	C20orf197	0.67448	1.89436	5.16988	0.354676	3.9904	0.0348102	0.325438
SIX2	KCNAB1	0.672445	3.16677	5.18304	5.7476	1.37341	0.00373408	0.325332
IRF1	NRN1	0.278535	2.69805	4.4528	1.15444	1.65317	0.0509281	0.325246
TEAD1	TRDMT1	0.430285	4.4925	4.06805	5.7476	1.48293	0.00482929	0.323683
DLX1	FOXJ2	-0.676424	4.05794	4.03839	5.7476	1.37034	0.00370339	0.323331
IRF1	SAMD9L	0.794975	2.69805	2.95774	0.466008	1.82833	0.0598181	0.323328
SIX2	B4GALT6	-0.338762	3.16677	4.80028	5.7476	1.65844	0.00658439	0.323205
HOXC8	ZMYM1	0.726056	2.26323	3.73595	5.7476	1.57972	0.00579721	0.323136
NR3C2	SEMA4F	-0.441469	3.84273	4.93478	0.452935	2.47791	0.0343829	0.323051
TFAP2A	GPR155	0.320562	2.12337	3.19292	0.942771	2.11033	0.0746303	0.322699
IRF1	TSHZ3	-0.600944	2.69805	2.12058	1.72945	1.1858	0.0457088	0.322297
FOXF2	L3MBTL1	-0.562826	4.16797	4.66583	5.7476	1.37298	0.00372978	0.322152
IRF1	TTI1	0.461075	2.69805	4.35956	5.7476	1.63097	0.00630969	0.320778
IRF1	LDOC1	-0.413328	2.69805	4.66998	5.7476	1.64916	0.00649161	0.320451
DLX1	TSPAN2	-0.449675	4.05794	4.33165	5.7476	1.47691	0.00476909	0.319989
MSC	DAAM2	0.80209	3.34675	0.115963	5.7476	4.75812	0.0375812	0.319932
TEAD4	CDKL3	-0.516672	3.87881	4.29668	2.63123	1.08493	0.0129921	0.319367
HOXC9	RASGEF1B	-0.233845	2.64331	5.00725	5.7476	1.93	0.0093	0.319303
FOSL1	RFXAP	0.49638	0.423381	4.57747	5.7476	2.95248	0.0195248	0.318736
SIX2	SMARCD1	-0.150099	3.16677	4.24101	5.7476	2.232	0.01232	0.318606
FOXC2	TMEM30B	-0.256369	2.81653	5.12904	5.7476	1.82155	0.00821554	0.318552
FOXC2	ZCCHC8	-0.213956	2.81653	3.38554	5.7476	2.22198	0.0122198	0.318388
TEAD1	APOBEC3F	-0.470101	4.4925	4.77837	5.7476	1.39307	0.00393069	0.317605
FOXD1	ABHD17A	-0.542292	0.54122	3.77509	5.7476	2.78715	0.0178715	0.317208
DLX2	SKA2	-0.5736	4.05641	3.82293	5.7476	1.43295	0.00432948	0.317176
ATF6B	BRD1	0.335214	3.39993	2.88801	5.7476	1.88787	0.00887867	0.3171
E2F3	JPH2	0.908863	1.0597	4.25678	0.426219	4.10548	0.0441976	0.317073
MAF	C17orf58	-0.578361	0.986989	5.00928	5.7476	1.97562	0.0097562	0.316779
MAF	SLC26A5	-0.17756	0.986989	5.13172	5.7476	3.02115	0.0202115	0.315628
FOXC2	FOPNL	-0.257689	2.81653	2.21039	5.7476	2.4164	0.014164	0.315591
NR3C2	PCBP4	0.194334	3.84273	4.71004	5.7476	1.8456	0.00845598	0.315501
PITX2	PLEKHG2	0.424407	2.98482	3.67168	5.7476	1.69552	0.00695525	0.31526
ERG	NECAB3	-0.522798	4.07346	4.76578	5.7476	1.38876	0.00388759	0.314939
POU5F1	SCIN	0.68519	4.28616	5.08829	5.7476	1.28517	0.00285167	0.314772
TEAD1	ZNF385D	0.457022	4.4925	4.39238	1.43219	2.12886	0.0114289	0.314252
HOXA1	DKK2	0.467851	4.38104	4.82478	1.94782	1.86566	0.00874291	0.314195
PITX2	NUDT9	0.728138	2.98482	3.85238	5.7476	1.44996	0.00449961	0.313964
NFE2	USP42	0.687564	4.25408	3.76597	5.7476	1.3635	0.00363496	0.313787
IRF1	KCNB1	0.134602	2.69805	4.24275	1.28528	1.77695	0.0891154	0.313599
TFAP2A	AIFM2	-0.643256	2.12337	3.70654	0.78596	2.22242	0.035435	0.313356
FOXC2	HOXB7	0.363166	2.81653	2.46434	0.868494	3.17729	0.0450118	0.313091
MEF2C	VIT	0.73997	3.40711	3.03965	1.25181	1.31611	0.0247981	0.313091
SHOX2	SMIM8	-0.58753	3.39409	2.99478	5.7476	1.57786	0.00577863	0.312967
TEAD4	CAD	0.635161	3.87881	4.67944	5.7476	1.34964	0.00349635	0.312676
GATA2	NINJ2	0.635254	4.25401	4.87835	0.362926	2.94212	0.022176	0.312163
ETV3	RBM41	-0.456515	3.87463	2.78441	5.7476	1.66267	0.00662669	0.311895
TP63	OVOL2	0.727535	3.9174	5.14038	5.7476	1.28656	0.0028656	0.310441
ATF5	KDM1B	-0.409142	2.9446	3.398	5.7476	1.75273	0.00752732	0.310432
SIX2	RAVER2	-0.23165	3.16677	2.52902	1.88442	2.45135	0.0361631	0.30992
ATF5	VCPKMT	-0.267576	2.9446	4.6169	5.7476	1.81592	0.00815919	0.30978
ELK3	SERPINB2	0.66509	2.04787	4.7733	5.7476	1.53806	0.00538057	0.309236
RUNX3	ERI2	-0.609738	4.16478	4.80656	5.7476	1.33069	0.00330689	0.308711
NR3C2	SLC27A3	-0.196078	3.84273	3.9238	5.7476	1.93697	0.00936966	0.308395
MAF	ALX4	-0.290921	0.986989	4.99589	5.7476	2.49676	0.0149676	0.308117
NR3C2	PRKD2	-0.30497	3.84273	4.27956	1.91259	1.12216	0.0285922	0.307764
CREB3	ASPHD1	0.769429	2.15835	4.60755	5.7476	1.4743	0.00474296	0.307526
DLX2	PFDN1	0.338089	4.05641	4.06262	5.7476	1.59986	0.00599863	0.307328
REL	HEPH	-0.198	3.74376	2.27549	5.7476	2.34919	0.0134919	0.307274
STAT4	FAM124A	-0.194193	3.47527	5.04872	5.7476	1.84854	0.00848539	0.307178
HOXC6	STEAP1	0.476419	1.82263	3.76128	5.7476	1.87327	0.00873269	0.307085
IRF1	LAYN	-0.387571	2.69805	1.01743	0.919404	4.58979	0.0683387	0.306813
SIX4	PDIK1L	-0.431334	3.82692	4.99976	5.7476	1.44697	0.00446967	0.306784
FOXF2	ABRACL	0.584136	4.16797	4.30274	5.7476	1.37135	0.00371348	0.306619
MAF	DGKG	-0.411279	0.986989	4.47461	5.7476	2.28341	0.0128341	0.305941
TFAP2A	CCDC33	0.590172	2.12337	5.19289	5.7476	1.53313	0.0053313	0.305712
DLX1	PFDN1	0.514427	4.05794	4.06262	5.7476	1.43594	0.00435944	0.305134
RUNX3	DNASE1L1	-0.593526	4.16478	2.52421	5.7476	1.54892	0.00548921	0.304917
HOXC10	CCDC90B	0.817958	3.25038	2.32979	5.7476	1.55169	0.00551687	0.304765
HOXB2	CYB5R2	0.278831	3.33247	4.65115	5.7476	1.71524	0.00715236	0.304739
ERG	SMOC2	-0.134991	4.07346	4.37906	0.68052	3.71058	0.0500891	0.304562
HOXC8	HOXC4	-0.157446	2.26323	4.40821	0.608269	4.82637	0.0659777	0.304255
NFIB	CMTM8	0.430565	1.63272	2.88847	5.7476	2.18888	0.0118888	0.303714
ATF5	ANK2	0.451272	2.9446	2.4303	5.7476	1.87113	0.0087113	0.302551
FOSL2	PIK3CD	-0.65294	1.4838	4.75319	5.7476	1.68019	0.00680188	0.302487
FOXC2	SLX4IP	-0.150005	2.81653	2.06931	0.427883	8.17291	0.098901	0.302377
ATF5	UCKL1	-0.283397	2.9446	4.31537	5.7476	1.80778	0.00807784	0.302252
MAF	HSPA12A	-0.201771	0.986989	3.37449	5.7476	3.34109	0.0234109	0.302113
SIX2	PPIL3	-0.481155	3.16677	3.98035	0.675863	2.47703	0.0297196	0.301756
TFAP2A	THSD1	0.213897	2.12337	4.72274	0.86735	2.10025	0.0772236	0.301746
TFAP2A	CSPP1	0.454529	2.12337	0.429162	5.7476	4.09157	0.0309157	0.301138
TFAP2A	WIPI1	0.280425	2.12337	2.65689	5.7476	2.3848	0.013848	0.30029
HOXC10	GPX8	0.768549	3.25038	3.34271	0.854886	2.2845	0.0183924	0.299945
HOXC10	WASF3	0.727495	3.25038	0.623922	5.7476	2.44604	0.0144604	0.299932
RFX7	NR4A2	-0.784128	4.4266	2.91315	0.883188	2.02777	0.01655	0.299702
FOSL2	C5orf46	0.362914	1.4838	1.95797	0.4673	3.67379	0.16541	0.299403
FOXF2	MAP3K7CL	-0.702906	4.16797	2.099	1.26055	1.09012	0.0353915	0.299066
MAF	XG	0.564555	0.986989	2.82534	3.36283	1.0115	0.0558335	0.298988
TEAD1	KRT23	0.666273	4.4925	5.17513	5.7476	1.26485	0.00264848	0.298252
FOXF2	FAM8A1	-0.589389	4.16797	3.14929	5.7476	1.45935	0.0045935	0.298078
MAF	ZNF543	0.33454	0.986989	5.06138	5.7476	2.33084	0.0133084	0.297956
HOXC10	ELP6	0.334423	3.25038	4.17296	5.7476	1.68018	0.00680184	0.297951
ERG	GDF6	0.164557	4.07346	3.29897	0.963613	1.12923	0.123618	0.297458
NFE2	ZNF234	-0.425835	4.25408	4.34466	5.7476	1.45249	0.00452494	0.297315
PITX2	STEAP1	0.473917	2.98482	3.76128	5.7476	1.60492	0.00604925	0.296892
RFX7	ALDH1A2	0.417724	4.4266	4.32252	1.58828	1.2218	0.0191169	0.296513
SIX4	VCP	0.40651	3.82692	4.03067	5.7476	1.53525	0.00535249	0.296155
TEAD4	C11orf80	-0.47196	3.87881	2.15113	4.22908	1.92161	0.00923284	0.295473
TFAP2A	OPN3	0.582693	2.12337	5.09817	0.897106	2.26394	0.0230356	0.295113
HOXC10	GATAD2B	-0.289813	3.25038	2.38158	5.7476	2.09265	0.0109265	0.294838
MAF	PSG4	0.453232	0.986989	4.79579	0.442044	4.90564	0.0633204	0.294577
TFAP2A	ACCS	-0.424266	2.12337	4.28826	5.7476	1.75551	0.00755508	0.294492
STAT4	KLHL3	-0.263666	3.47527	3.28871	5.7476	1.89563	0.00895635	0.294063
EGR3	PIAS1	0.828919	3.83046	3.14405	0.723029	2.41822	0.0168411	0.293951
HOXC8	MCMDC2	0.552019	2.26323	5.04286	5.7476	1.52928	0.00529284	0.293105
RFX7	GNA13	0.62926	4.4266	3.90034	3.31006	1.52994	0.00532633	0.293049
SIX2	STON2	-0.492734	3.16677	0.952049	5.7476	2.41808	0.0141808	0.292782
TFAP2A	PHC3	-0.384341	2.12337	3.11675	5.7476	2.00029	0.0100029	0.292515
HOXC9	LMOD1	-0.335026	2.64331	1.29881	5.7476	2.66186	0.0166186	0.29244
HOXC10	TP53RK	0.157546	3.25038	4.49493	5.7476	2.06798	0.0106798	0.292189
TFAP2A	PREP	-0.324708	2.12337	3.09787	5.7476	2.12091	0.0112091	0.291851
MAF	EMC9	-0.323981	0.986989	4.86593	5.7476	2.37363	0.0137363	0.291586
HOXC9	PABPC5	0.466321	2.64331	5.02333	5.7476	1.5332	0.00533198	0.290936
NR3C2	ZNF329	0.273166	3.84273	4.68007	5.7476	1.63112	0.00631121	0.290673
HOXD8	C17orf82	0.36554	3.8552	5.16545	5.7476	1.47194	0.00471936	0.290635
PITX1	ARSI	0.817436	3.01944	5.06589	5.7476	1.30878	0.00308781	0.29043
NR3C2	FMNL3	-0.364655	3.84273	3.23075	1.86202	1.45972	0.0235841	0.290201
NR3C2	B4GALT6	-0.127747	3.84273	4.80028	0.894002	1.88717	0.0729583	0.290055
ATF5	NEIL1	0.47922	2.9446	4.87204	5.7476	1.49174	0.00491737	0.289857
SOX18	MXRA5	-0.281492	4.37088	2.25121	5.7476	1.93884	0.00938839	0.289781
MXD1	TLR1	0.58499	3.33877	5.03819	5.7476	1.37311	0.00373115	0.289765
FOXC2	LYPLA1	-0.212803	2.81653	3.37665	5.7476	2.15434	0.0115434	0.289276
NR3C2	PI4K2A	0.611043	3.84273	4.18025	5.7476	1.37277	0.00372768	0.288693
PITX2	TM2D2	0.788121	2.98482	3.017	5.7476	1.47855	0.00478551	0.288627
FOXD1	OSMR	-0.336508	0.54122	2.11453	5.7476	4.14356	0.0314356	0.288313
RFX2	FAM102B	0.594666	1.13504	4.61758	5.7476	1.86346	0.0086346	0.288236
TEAD4	ARL15	-0.546781	3.87881	1.46027	5.7476	1.86695	0.00866946	0.288108
TEAD4	CEP85	0.660343	3.87881	5.04062	5.7476	1.29883	0.00298828	0.288012
GMEB2	SLX4IP	-0.378965	4.02845	2.06931	5.7476	1.85504	0.00855037	0.287997
TFAP2A	OXTR	0.305511	2.12337	2.61448	1.46248	1.56156	0.0742097	0.287441
TP63	RHOBTB2	-0.525042	3.9174	4.36065	5.7476	1.39833	0.00398331	0.287134
NR3C2	IL17B	0.560814	3.84273	5.18581	5.7476	1.33466	0.00334656	0.286899
NR3C2	NFIC	-0.229765	3.84273	3.50474	1.99691	1.68995	0.0274582	0.286736
PITX2	ZNF385D	0.56166	2.98482	4.39238	0.369162	3.62666	0.0290318	0.286213
HOXC10	MPPED2	-0.540432	3.25038	3.54883	0.803559	2.37059	0.0240923	0.286097
TFAP2A	PLEC	0.456562	2.12337	3.99904	0.973093	1.98869	0.0381025	0.285862
NR3C1	FGF1	-0.514436	4.27086	4.16888	2.4884	1.01736	0.0123062	0.285356
RUNX3	KBTBD4	-0.648138	4.16478	4.96454	5.7476	1.28759	0.00287588	0.285216
MSC	PRDM16	0.706249	3.34675	2.63743	0.460203	2.29706	0.0432569	0.285062
FLI1	NRN1	0.804431	1.09686	4.4528	1.14334	1.10057	0.0576567	0.285048
NR3C2	ACCS	-0.265563	3.84273	4.28826	5.7476	1.67502	0.00675018	0.284387
NR3C2	ZNF500	-0.105453	3.84273	4.5168	0.515382	3.93531	0.0765393	0.284134
NFE2L2	NINJ2	0.688936	2.67598	4.87835	0.665704	2.29258	0.020695	0.284055
EGR3	CPXM2	0.850588	3.83046	3.59513	0.589398	1.44813	0.0283493	0.283429
FLI1	WDR19	-0.31055	1.09686	2.99321	5.7476	2.75473	0.0175473	0.283267
RFX7	CYP2U1	0.4313	4.4266	4.22211	5.7476	1.42812	0.00428119	0.283266
SIX2	AMMECR1	-0.520485	3.16677	2.52629	5.7476	1.69667	0.00696671	0.282891
NFE2	RHOG	0.278116	4.25408	3.9738	5.7476	1.6388	0.00638804	0.282891
HOXC8	PTRH2	0.449398	2.26323	4.06623	5.7476	1.69928	0.00699284	0.282461
FOSL2	MARVELD1	-0.667229	1.4838	2.10021	5.7476	2.11587	0.0111587	0.282165
MAF	NT5M	-0.116323	0.986989	5.1367	5.7476	3.42721	0.0242721	0.281965
MAF	PENK	-0.15261	0.986989	0.824118	4.51545	4.75836	0.105618	0.281695
FOSL2	IQCA1	-0.338531	1.4838	3.37297	5.7476	2.27253	0.0127253	0.281611
HOXC8	VPS11	-0.616868	2.26323	4.43899	5.7476	1.51986	0.0051986	0.281438
TFAP2A	UROS	-0.499599	2.12337	3.62655	5.7476	1.73399	0.00733986	0.281424
NR3C2	IQCD	-0.279953	3.84273	4.95454	5.7476	1.58036	0.00580358	0.280974
NFE2	IRF1	0.334541	4.25408	3.42948	5.7476	1.6184	0.00618403	0.280755
PITX2	RASSF9	0.302001	2.98482	3.68621	2.03684	1.61713	0.0256476	0.280709
FOXC2	FBXO28	-0.144342	2.81653	1.65097	5.7476	3.2423	0.022423	0.280466
RUNX3	STON2	-0.656679	4.16478	0.952049	5.7476	1.95738	0.00957377	0.280446
RUNX3	ERF	0.789519	4.16478	4.22	3.10898	1.44641	0.00449356	0.280392
IRF1	ATIC	0.229682	2.69805	2.82595	5.7476	2.24217	0.0124217	0.280334
IRF1	CYP2E1	-0.463528	2.69805	5.09803	5.7476	1.50658	0.00506579	0.279675
HOXC8	SCG5	0.411302	2.26323	5.14284	5.7476	1.62523	0.00625229	0.279597
NR3C2	SAMD4B	0.236833	3.84273	2.23318	5.7476	2.12566	0.0112566	0.279508
NR3C2	GRB14	0.55018	3.84273	4.87606	0.825757	1.27883	0.0256523	0.279257
ERG	PAG1	0.491469	4.07346	3.57945	2.22973	1.15847	0.0150779	0.279097
TFAP2A	VCPIP1	0.769391	2.12337	4.09325	0.454244	2.51312	0.0365571	0.279072
NR3C2	PHLDB2	0.21283	3.84273	0.88189	5.7476	3.14175	0.0214175	0.278942
TEAD1	SPRY4	0.630576	4.4925	5.06371	2.60575	1.41366	0.00526625	0.278275
TEAD4	EDARADD	0.444197	3.87881	5.17777	5.7476	1.3902	0.00390197	0.27814
NR3C2	SLC2A14	0.569979	3.84273	5.18887	5.7476	1.32197	0.00321967	0.278029
RFX2	PCDHGB6	-0.411889	1.13504	4.90094	5.7476	2.03518	0.0103518	0.277445
RUNX3	ADAM17	-0.677779	4.16478	3.66626	0.872096	1.77282	0.0173199	0.277126
FOXF2	NEU1	0.420815	4.16797	4.36956	5.08484	1.47952	0.00480124	0.276823
TP63	PCLO	0.488651	3.9174	5.1628	0.697815	1.96681	0.0203832	0.276476
HOXC6	LANCL2	-0.200483	1.82263	4.40008	5.7476	2.30011	0.0130011	0.276346
TP63	ANGPT1	-0.378025	3.9174	0.501926	5.7476	3.0912	0.020912	0.276164
NFE2	ASPHD1	0.504033	4.25408	4.60755	5.7476	1.35708	0.00357083	0.275168
IRF1	UBE2J1	-0.448857	2.69805	3.85114	5.7476	1.62948	0.00629478	0.274956
FOXC2	HAUS8	0.198812	2.81653	5.08905	5.7476	1.88846	0.00888459	0.274805
RFX7	ZFPM1	0.625089	4.4266	4.21676	5.7476	1.31219	0.00312188	0.27472
ATF5	DAB2IP	-0.520591	2.9446	4.38455	5.7476	1.48025	0.00480245	0.27462
SHOX2	ABCB9	0.840659	3.39409	4.90136	4.34735	1.33661	0.00337665	0.274394
SIX2	EVA1C	-0.261241	3.16677	2.30602	5.7476	2.15826	0.0115826	0.274105
SIX2	WNK3	-0.431579	3.16677	4.581	5.7476	1.50478	0.00504783	0.273339
FOXD1	RPS6KA5	-0.655759	0.54122	3.88988	5.7476	2.42145	0.0142145	0.273118
FOXC2	STX4	0.411758	2.81653	3.67583	0.903909	2.6318	0.0269062	0.272863
FOXD1	TMEM30B	-0.610085	0.54122	5.12904	5.7476	2.24684	0.0124684	0.272692
NR3C2	MUS81	0.230841	3.84273	4.76171	5.7476	1.67157	0.0067157	0.272532
FOXD1	PKD1L1	0.179167	0.54122	4.36789	5.7476	3.87998	0.0287998	0.272025
HOXC8	CACNB4	-0.322015	2.26323	0.384936	5.7476	4.63329	0.0363329	0.271439
RUNX3	PSMB5	0.739154	4.16478	4.43827	5.7476	1.2717	0.00271699	0.271331
FOSL2	CELSR1	0.691444	1.4838	4.98545	5.7476	1.58286	0.00582861	0.271226
FOXD1	HAUS8	0.548945	0.54122	5.08905	5.7476	2.3358	0.013358	0.271145
NFE2	BANP	0.411514	4.25408	4.05545	5.7476	1.45597	0.00455972	0.270899
PITX2	CLCA2	0.599196	2.98482	5.16543	5.7476	1.37182	0.00371902	0.270898
SOX5	CYP2U1	0.177797	2.45542	4.22211	5.7476	2.17331	0.011733	0.270145
FOXC2	METTL16	-0.171585	2.81653	2.89486	5.7476	2.39776	0.0139776	0.269492
ETV5	RAB3B	0.735952	1.88554	1.86329	5.7476	1.93625	0.00936253	0.269406
NFE2	CHMP4A	0.517775	4.25408	1.98438	5.7476	1.64977	0.00649769	0.269303
MAF	SKA2	-0.568965	0.986989	3.82293	5.7476	2.05889	0.0105889	0.269006
HOXC8	DDX23	-0.545085	2.26323	4.44717	4.9025	1.6174	0.00618196	0.26893
RFX2	SEC16B	0.450726	1.13504	4.17321	5.7476	2.06191	0.0106191	0.268683
RUNX3	SERTAD2	-0.72728	4.16478	1.42501	5.7476	1.65428	0.00654277	0.268515
SIX4	HRH1	0.358901	3.82692	2.01083	5.7476	1.89315	0.00893154	0.26841
NR3C2	DYRK4	-0.147265	3.84273	4.61404	5.7476	1.92721	0.00927215	0.268174
NFE2	PREP	-0.281021	4.25408	3.09787	5.7476	1.72867	0.00728669	0.268125
NR3C2	STARD5	0.468822	3.84273	4.96152	1.41271	1.51519	0.0139825	0.267528
RUNX3	PRKG2	0.330356	4.16478	5.16365	5.7476	1.45088	0.00450884	0.267125
FOSL2	HELB	-0.194635	1.4838	4.62618	5.7476	2.43008	0.0143008	0.26686
IRF1	CACNB2	0.857745	2.69805	4.68279	0.509094	1.77363	0.0272662	0.266807
TFAP2A	SNX19	0.358704	2.12337	1.44611	5.7476	2.61291	0.0161291	0.266799
SIX4	CAD	0.483398	3.82692	4.67944	5.7476	1.38652	0.00386522	0.266646
ERG	C20orf197	0.1885	4.07346	5.16988	1.21958	1.50646	0.0365514	0.26658
DLX1	ZNF3	0.399374	4.05794	4.3332	5.7476	1.45397	0.00453972	0.26642
NR3C1	KIF9	-0.339129	4.27086	4.56016	3.02163	1.7562	0.00760009	0.266375
ERG	CAP1	0.444597	4.07346	3.12133	5.7476	1.53406	0.00534061	0.266189
HOXC8	CLN5	0.651528	2.26323	4.23778	1.38414	1.87683	0.0163972	0.266182
TEAD4	PTGER2	0.609267	3.87881	5.1856	5.7476	1.2923	0.00292305	0.266068
REL	TIPIN	-0.436888	3.74376	4.5948	5.7476	1.43028	0.00430278	0.265828
TFAP2A	WIZ	0.354708	2.12337	4.42678	0.931899	1.57374	0.0543616	0.265814
SHOX2	GDPD5	0.476809	3.39409	4.59436	5.7476	1.43297	0.00432968	0.265137
PITX2	APLN	0.305651	2.98482	4.70705	5.7476	1.65022	0.0065022	0.264839
NR3C1	ZNF766	-0.41725	4.27086	3.9034	5.7476	1.45518	0.00455177	0.264812
DLX1	PITX2	0.726319	4.05794	3.55676	0.811302	2.06611	0.0150668	0.264755
NFE2	IMPDH1	0.579202	4.25408	2.93288	5.7476	1.44203	0.0044203	0.264754
HOXC8	TMEM200B	-0.636439	2.26323	4.78878	2.63459	1.27959	0.0113833	0.264705
RFX7	CCDC148	0.299612	4.4266	3.06867	5.7476	1.67518	0.00675181	0.264574
GATA2	HPS3	0.638167	4.25401	2.68215	5.7476	1.43878	0.00438779	0.264206
IRF1	INTS3	0.398026	2.69805	3.91424	5.7476	1.65831	0.00658306	0.263748
HOXC9	DNAH7	-0.417263	2.64331	3.53424	5.7476	1.6944	0.00694403	0.263615
PITX2	SGCE	0.849009	2.98482	2.73591	2.41644	1.17918	0.0133377	0.263493
EGR3	ALDH1A2	0.787596	3.83046	4.32252	1.66576	1.23267	0.00983782	0.263421
TFAP2A	IMPACT	0.113794	2.12337	3.93071	5.7476	2.75073	0.0175073	0.262886
SHOX2	SIM1	0.701075	3.39409	4.11539	0.380468	2.93447	0.0239876	0.262261
ERG	PDE12	0.47601	4.07346	4.64765	5.7476	1.36852	0.00368525	0.261227
FOSL2	CCDC153	0.738213	1.4838	5.17702	5.7476	1.52539	0.00525393	0.26121
FOXD2	ERI1	-0.308795	4.36604	3.94537	5.7476	1.55051	0.00550506	0.260956
FOXC2	KCTD18	-0.21782	2.81653	4.07235	5.7476	1.93711	0.00937112	0.260669
MAF	MAP6	-0.301524	0.986989	4.04892	1.70515	1.84953	0.0685642	0.260551
FLI1	RUNX3	0.718181	1.09686	4.86837	1.35632	1.26079	0.039714	0.260446
HOXC10	NR4A2	-0.697044	3.25038	2.91315	5.7476	1.46769	0.00467694	0.2604
IRF1	TP53BP1	-0.48442	2.69805	2.6858	5.7476	1.74083	0.00740826	0.260198
NFKB1	ATG4C	0.884696	2.30791	4.10943	5.7476	1.3884	0.003884	0.260061
TFAP2A	MORN1	-0.186821	2.12337	4.39763	0.990265	2.2705	0.0662816	0.259978
SIX2	FKBP5	-0.466427	3.16677	4.65024	5.7476	1.45274	0.00452742	0.259657
NFKB1	CCDC90B	0.710464	2.30791	2.32979	5.7476	1.6968	0.00696795	0.259596
HOXC6	ZNF772	0.345676	1.82263	5.08556	5.7476	1.78819	0.00788191	0.259561
MAF	FANCC	-0.481879	0.986989	3.60264	1.48786	1.92417	0.0529014	0.259505
ERG	THAP7	-0.514467	4.07346	4.29505	5.7476	1.36688	0.00366883	0.259438
TP63	CCDC36	-0.433831	3.9174	2.91086	5.7476	1.57807	0.00578075	0.259381
IRF1	NIPAL3	0.854853	2.69805	1.61625	1.94173	1.10792	0.0323334	0.259299
NFE2	TMEM130	0.699935	4.25408	2.523	0.832755	1.38413	0.0299441	0.25929
TFAP2A	CLIC6	0.791533	2.12337	5.19255	5.7476	1.37571	0.00375708	0.259262
FOSL1	VPS13D	-0.505854	0.423381	1.99145	5.7476	3.79014	0.0279014	0.259235
FOXD1	SCNN1A	0.579021	0.54122	5.17085	5.7476	2.24126	0.0124126	0.259102
HOXC10	TM2D2	0.779917	3.25038	3.017	5.7476	1.41605	0.00416049	0.25898
EGR3	GREM1	0.683411	3.83046	1.44116	1.63823	1.05197	0.0397625	0.258524
TP63	PPP6R2	-0.697018	3.9174	2.53044	5.7476	1.44911	0.00449107	0.258449
DLX2	SRFBP1	0.303313	4.05641	3.50536	5.7476	1.63655	0.00636546	0.258232
NR3C2	NOG	-0.257217	3.84273	2.93136	0.958498	1.54307	0.0601822	0.257902
HOXD8	SLC7A8	0.560491	3.8552	3.90989	3.56348	1.55004	0.00552294	0.25773
IRF1	HAUS8	0.477264	2.69805	5.08905	5.7476	1.46618	0.00466179	0.257438
HOXC9	TRDMT1	0.241601	2.64331	4.06805	5.7476	1.90431	0.00904309	0.257143
SIX2	TMEM120B	0.136003	3.16677	3.79346	5.7476	2.22866	0.0122866	0.257134
MAF	PIK3CD	-0.622505	0.986989	4.75319	1.48549	1.78169	0.0332239	0.256799
TFAP2A	EML6	0.186008	2.12337	5.08895	5.7476	2.07228	0.0107228	0.256701
RUNX3	SMG6	-0.520488	4.16478	3.13105	1.24413	1.97597	0.0153783	0.256595
EGR3	NDST2	0.578672	3.83046	3.93054	5.7476	1.37313	0.00373134	0.256567
FOXD2	LAMC1	0.51502	4.36604	2.71246	5.7476	1.48998	0.00489979	0.255929
SIX2	KBTBD4	-0.516063	3.16677	4.96454	5.7476	1.39376	0.00393757	0.255917
RUNX3	TMEM140	0.427715	4.16478	4.3893	1.00037	2.17449	0.0150366	0.255748
HOXA1	TOX2	-0.548779	4.38104	4.6234	5.7476	1.30635	0.00306353	0.255685
HOXC10	TNRC6B	-0.342803	3.25038	2.87976	5.7476	1.77911	0.00779106	0.255635
SIX4	PHC2	0.580075	3.82692	2.09276	5.7476	1.59812	0.00598121	0.255234
SREBF1	LYPD1	0.570447	3.22423	4.0176	5.7476	1.42197	0.00421969	0.254839
TFAP2A	MLPH	0.698791	2.12337	4.80365	1.37449	1.36625	0.0190371	0.254808
TFAP2A	ACTR3	0.226962	2.12337	4.66388	5.7476	1.98943	0.00989433	0.25429
NR3C2	SSBP4	-0.182487	3.84273	2.51773	5.7476	2.15916	0.0115916	0.253978
HOXC10	NUDT12	0.749883	3.25038	4.84059	2.70781	1.03222	0.00769168	0.253652
SHOX2	TRIB2	0.812494	3.39409	3.38777	5.7476	1.3499	0.003499	0.253624
EGR3	ECI2	-0.603333	3.83046	2.02722	5.7476	1.59147	0.00591475	0.253473
NFE2L2	STPG2	-0.146818	2.67598	3.68576	5.7476	2.31515	0.0131515	0.253411
TFAP2A	CYP11A1	0.528235	2.12337	5.10595	0.463509	1.99786	0.0477765	0.253377
PITX2	PDE12	0.683568	2.98482	4.64765	5.7476	1.34532	0.00345318	0.253201
SIX2	BID	0.490376	3.16677	4.13918	5.7476	1.46702	0.00467017	0.253113
TEAD1	SELPLG	0.559892	4.4925	4.37221	0.440811	2.24951	0.0231685	0.252658
TP63	POLM	0.264426	3.9174	4.62477	5.7476	1.5801	0.00580098	0.252386
FOXC2	ELP6	0.396249	2.81653	4.17296	5.7476	1.59215	0.00592147	0.252364
HOXC10	PAG1	0.437762	3.25038	3.57945	2.566	1.10985	0.0173756	0.252028
MAF	PPIC	0.128216	0.986989	2.78707	5.7476	4.05796	0.0305796	0.251551
DLX1	CYP2U1	0.53105	4.05794	4.22211	5.7476	1.35488	0.00354876	0.25144
FOXD1	RUNX3	0.885976	0.54122	4.86837	0.984899	1.78002	0.0613784	0.251195
IRF1	ALKBH8	-0.478203	2.69805	4.23688	5.7476	1.52432	0.00524323	0.251115
SIX4	ALKBH8	-0.167664	3.82692	4.23688	5.7476	1.86233	0.00862334	0.250932
MAF	FBXL8	0.385627	0.986989	4.8139	5.7476	2.12195	0.0112195	0.250709
NFE2	TRAPPC10	0.499801	4.25408	2.29455	5.7476	1.56954	0.00569535	0.250656
PITX2	GNG2	0.647582	2.98482	3.82988	0.65366	2.49238	0.0207645	0.25043
HOXC8	MPND	-0.58137	2.26323	5.09047	5.7476	1.44894	0.00448936	0.250415
IRF1	HRH1	0.206654	2.69805	2.01083	3.12187	1.32224	0.0540433	0.250113
TEAD1	PCDHB13	-0.467152	4.4925	5.13686	5.7476	1.30842	0.00308425	0.250051
BHLHE41	ERBB4	0.928377	3.08537	2.83711	1.28783	1.33926	0.0178267	0.249861
SIX2	HSPBP1	0.411425	3.16677	4.17049	5.7476	1.52455	0.00524549	0.249751
HOXC10	DOCK10	0.685646	3.25038	2.35865	0.985629	2.35278	0.0204848	0.249704
HOXD8	PACS1	-0.446846	3.8552	5.19814	5.7476	1.35717	0.00357172	0.249488
HOXC8	RGS7	-0.303629	2.26323	0.766232	2.47247	2.37924	0.0804976	0.249337
TEAD1	KCNK1	0.658686	4.4925	4.00633	5.7476	1.28457	0.00284568	0.249083
RUNX3	PEA15	-0.187761	4.16478	3.14987	5.7476	1.91751	0.00917511	0.249072
FOXD2	NLRX1	-0.240074	4.36604	3.74533	5.7476	1.66253	0.00662531	0.248534
TEAD4	CENPV	0.522304	3.87881	4.7305	5.7476	1.33725	0.00337249	0.248416
SIX2	TRAF3IP1	0.209368	3.16677	4.03706	5.7476	1.86531	0.00865312	0.248314
MAF	KLKB1	0.300005	0.986989	3.82714	5.7476	2.51517	0.0151517	0.248215
HOXC10	HOXB5	-0.589186	3.25038	3.54662	0.777469	1.42514	0.0329826	0.248214
NFE2	SAMD4B	0.553104	4.25408	2.23318	5.7476	1.53516	0.00535165	0.248122
IRF1	B4GALT6	-0.402981	2.69805	4.80028	0.88451	1.8357	0.0292583	0.247945
SIX2	WDR18	0.373333	3.16677	4.59221	5.7476	1.52163	0.00521628	0.247679
ERG	PABPC4L	0.392501	4.07346	5.16223	0.415874	2.82238	0.0255643	0.247658
HOXC10	HECTD3	0.40931	3.25038	4.85573	5.7476	1.45704	0.00457037	0.247258
FOXD1	ZNF772	0.172248	0.54122	5.08556	5.7476	3.55269	0.0255269	0.247121
IRF1	GPR156	0.285977	2.69805	5.07269	2.92295	1.47919	0.0145998	0.247065
DLX1	SMOC2	-0.209772	4.05794	4.37906	5.7476	1.68436	0.00684359	0.246967
FOXD1	SLX4IP	-0.413594	0.54122	2.06931	0.439158	9.48974	0.127593	0.246306
RFX7	HAS1	0.308716	4.4266	3.01722	0.176568	6.18001	0.0547186	0.246191
TP63	MRPL27	-0.730064	3.9174	3.26644	5.7476	1.34166	0.0034166	0.246125
HOXC8	PIF1	0.44329	2.26323	5.0001	5.7476	1.54995	0.0054995	0.245767
HOXD8	ZNF135	0.586942	3.8552	4.54729	5.7476	1.3157	0.00315704	0.245652
HOXC9	VIT	0.190317	2.64331	3.03965	2.33312	1.58418	0.0434606	0.245633
HOXC10	TRAM1L1	0.508081	3.25038	5.00795	0.412641	2.83672	0.0253362	0.245277
SIX2	MIB1	-0.295149	3.16677	2.79871	5.7476	1.87117	0.00871169	0.245085
TEAD4	ANAPC10	-0.379448	3.87881	2.72882	5.7476	1.6443	0.00644298	0.244557
SIX4	RNF11	-0.576419	3.82692	2.69237	5.7476	1.48291	0.00482906	0.244446
HOXD8	RASGEF1B	-0.18112	3.8552	5.00725	5.7476	1.71083	0.0071083	0.244383
HOXB2	PLD5	0.354362	3.33247	5.11753	5.7476	1.47641	0.00476411	0.244315
TEAD4	TRAPPC10	0.23334	3.87881	2.29455	5.7476	2.01508	0.0101508	0.244153
HOXC10	JAM3	0.375178	3.25038	1.29153	5.7476	2.21647	0.0121647	0.244076
MAF	NFATC1	-0.369427	0.986989	4.22719	5.7476	2.23315	0.0123315	0.243957
GATA2	LYPLA1	-0.56793	4.25401	3.37665	5.7476	1.37743	0.00377425	0.243762
MAF	ZNF736	0.325723	0.986989	3.42393	5.7476	2.52503	0.0152503	0.243622
MAFG	CCDC180	-0.323729	0.718613	4.83691	5.7476	2.50409	0.0150409	0.243589
HOXC9	PTRH2	0.418863	2.64331	4.06623	5.7476	1.59031	0.00590307	0.242917
HOXC10	SMURF2	0.5194	3.25038	1.51427	5.7476	1.87898	0.00878979	0.242676
HOXB2	LMO2	0.486667	3.33247	4.85088	0.756677	2.33763	0.017408	0.242246
TP63	TCF7	-0.605512	3.9174	4.17888	0.844591	1.48807	0.0194205	0.241942
HOXC8	VGLL3	-0.432677	2.26323	2.80284	5.7476	1.83543	0.00835432	0.241895
SIX2	PLA2R1	-0.436848	3.16677	0.426696	5.7476	3.21648	0.0221648	0.241877
SIX4	GDF6	0.433021	3.82692	3.29897	0.259007	4.49474	0.0379465	0.241504
HOXD8	NTNG1	0.644098	3.8552	4.60629	5.7476	1.28539	0.00285394	0.241167
FLI1	IL21R	0.773545	1.09686	3.99458	0.817636	1.85115	0.0469973	0.241091
NR3C2	KIAA0930	0.370243	3.84273	3.61065	0.945029	1.66264	0.0298693	0.241091
NR3C2	PSG8	0.135714	3.84273	5.18365	5.7476	1.84131	0.00841312	0.240698
HOXC6	MYOZ2	-0.139909	1.82263	4.15382	0.526586	6.83514	0.0630999	0.240567
TEAD4	DPH3	-0.551637	3.87881	4.19375	1.87934	1.7884	0.00797071	0.240392
RUNX3	MNT	-0.601936	4.16478	4.6243	0.430671	2.28924	0.0210288	0.240348
HOXC10	KLRD1	0.106135	3.25038	3.3896	5.7476	2.45552	0.0145552	0.240208
IRF1	PABPC5	0.163886	2.69805	5.02333	5.7476	1.95989	0.00959889	0.240173
MEF2A	SAP30	-0.518829	2.79734	3.8296	5.7476	1.5008	0.00500801	0.240103
ATF5	CNTNAP4	-0.147605	2.9446	5.18653	5.7476	1.95	0.00950005	0.240023
RUNX3	SRSF3	-0.278292	4.16478	1.96812	5.7476	1.94196	0.00941959	0.23983
HOXC6	ZCCHC8	-0.310712	1.82263	3.38554	5.7476	2.05744	0.0105744	0.239746
TFAP2A	FSIP1	-0.262457	2.12337	2.32227	5.7476	2.36276	0.0136276	0.23951
IRF1	PCDHGB6	-0.297264	2.69805	4.90094	5.7476	1.64454	0.00644541	0.239471
HOXC10	ERG	0.200223	3.25038	4.76887	0.350145	5.17373	0.0425889	0.239449
ERG	TXN2	-0.376444	4.07346	3.09448	0.70473	2.63685	0.0271464	0.239372
NFE2L2	B4GALT6	-0.593684	2.67598	4.80028	0.938979	1.31104	0.0254949	0.239347
MXD1	WDHD1	-0.44652	3.33877	4.77287	5.7476	1.41382	0.00413816	0.239273
TEAD4	APLN	0.278629	3.87881	4.70705	5.7476	1.53343	0.00533427	0.239165
HOXC10	GLRB	0.153477	3.25038	3.83839	5.7476	2.05644	0.0105644	0.239096
FOXF2	SYBU	-0.31801	4.16797	3.96163	5.7476	1.52073	0.00520733	0.238997
IRF1	LRRC47	0.838019	2.69805	4.64783	5.7476	1.30343	0.00303433	0.238887
FOXC2	RPS6KA5	-0.240615	2.81653	3.88988	5.7476	1.85106	0.00851063	0.238695
NFKB1	PAFAH1B2	0.746575	2.30791	2.98072	5.7476	1.52835	0.00528352	0.238367
MSC	UBR7	0.718405	3.34675	4.50513	5.7476	1.29522	0.00295221	0.238055
TFAP2A	ADCK1	0.78513	2.12337	4.98697	0.461267	1.80407	0.0343977	0.237979
FOXD2	TBX15	0.49554	4.36604	2.97704	0.631231	1.29482	0.0451632	0.237756
NFIB	MCMDC2	0.390341	1.63272	5.04286	5.7476	1.73907	0.00739074	0.237424
STAT4	AKAP8	-0.256688	3.47527	3.17027	5.7476	1.80754	0.00807538	0.237261
MXD1	PTPN13	-0.42794	3.33877	2.77672	5.7476	1.63593	0.00635927	0.237224
TEAD1	RASAL2	0.62004	4.4925	3.06996	5.7476	1.35593	0.00355935	0.237212
SIX2	SAMM50	0.321326	3.16677	3.78854	1.711	1.59994	0.0224551	0.236975
HOXC10	SVEP1	-0.392413	3.25038	1.79444	5.7476	1.93212	0.00932116	0.236917
FOSL2	WIPI1	0.623744	1.4838	2.65689	5.7476	1.88711	0.00887109	0.2366
NR3C2	CMYA5	0.59055	3.84273	3.6576	0.948111	1.06407	0.0282452	0.23652
FOSL2	PACS1	-0.592567	1.4838	5.19814	5.7476	1.57217	0.00572173	0.236306
IRF1	PSMB7	0.743696	2.69805	3.07698	5.7476	1.45677	0.00456769	0.236127
TP63	RTN3	-0.396995	3.9174	3.32706	5.7476	1.52163	0.00521634	0.236051
ERG	COLEC12	0.218316	4.07346	5.09953	5.7476	1.57488	0.00574884	0.235991
TFAP2A	POMGNT2	0.45879	2.12337	4.88292	5.7476	1.55399	0.00553988	0.235372
ATF5	ALKBH3	0.470868	2.9446	4.46866	5.7476	1.45372	0.00453722	0.234888
FOXF2	SETMAR	-0.63611	4.16797	3.88577	5.7476	1.30416	0.00304159	0.234883
NFE2	PLEC	0.594639	4.25408	3.99904	0.839795	1.50352	0.0183842	0.234825
HOXC8	TCP11L2	-0.288161	2.26323	2.18994	5.7476	2.26369	0.0126369	0.234822
TFAP2A	PTGIS	-0.31673	2.12337	2.822	0.578564	2.44909	0.0872858	0.234732
HOXB7	NOX5	0.502389	1.85807	4.50924	0.850639	2.8244	0.0231996	0.234616
NR3C1	CCDC153	0.540045	4.27086	5.17702	5.7476	1.26916	0.00269159	0.234443
FOXC2	KLC2	0.743745	2.81653	4.36521	5.7476	1.33416	0.00334159	0.23431
HOXB7	LYPLA1	-0.772556	1.85807	3.37665	5.7476	1.54452	0.00544522	0.234301
NR3C1	CLPTM1	0.287009	4.27086	4.00834	5.7476	1.53864	0.00538638	0.234043
SIX2	TSEN15	-0.376299	3.16677	2.61753	5.7476	1.74717	0.00747171	0.234036
RUNX3	ALDH3B1	0.4463	4.16478	3.7583	5.7476	1.41259	0.00412589	0.234008
FOXF2	KDM1B	-0.679548	4.16797	3.398	5.7476	1.32036	0.00320356	0.233979
NR3C2	VCPIP1	0.183527	3.84273	4.09325	5.7476	1.78811	0.00788114	0.233819
FOXC2	EIF3F	-0.260804	2.81653	2.90175	5.7476	1.96882	0.0096882	0.233681
FOSL2	CDS1	0.585554	1.4838	5.1286	5.7476	1.57813	0.0057813	0.233666
NR3C2	APOBEC3F	-0.387403	3.84273	4.77837	5.7476	1.40628	0.00406279	0.233595
NR3C1	PDE4C	0.396411	4.27086	5.17374	5.7476	1.34475	0.00344751	0.233399
HOXC9	RASSF3	0.476454	2.64331	4.01573	1.01701	2.67324	0.0169683	0.23331
HOXC10	USP32	-0.682946	3.25038	3.67112	5.7476	1.36483	0.00364829	0.233224
IRF1	NXF1	-0.699453	2.69805	4.76173	5.7476	1.33753	0.00337526	0.233168
MAF	PLXDC2	0.453269	0.986989	0.725327	5.7476	4.06986	0.0306986	0.233016
PAX8	PIAS1	0.877362	4.26212	3.14405	5.7476	1.27107	0.0027107	0.232826
IRF1	ADCY6	0.640074	2.69805	3.36641	2.1223	1.61729	0.0116557	0.232585
TFAP2A	DOCK6	0.449402	2.12337	3.49665	5.7476	1.70917	0.00709174	0.232455
FOXC2	TMEM140	0.253874	2.81653	4.3893	1.62113	2.30596	0.0198019	0.232329
MAFG	CHIC2	0.860391	0.718613	1.34422	5.7476	2.7592	0.017592	0.231871
TEAD4	TCP11L1	-0.556373	3.87881	3.52354	5.7476	1.38335	0.00383351	0.231771
ETV3	SETMAR	-0.484594	3.87463	3.88577	5.7476	1.39525	0.00395253	0.23126
NFE2L2	NAP1L3	-0.464858	2.67598	4.10779	5.7476	1.51817	0.00518171	0.231042
TFAP2A	ALX4	-0.436312	2.12337	4.99589	0.36619	3.93076	0.0346755	0.231017
FOXF2	NOP14	0.428382	4.16797	4.29297	5.7476	1.37953	0.00379529	0.230662
TEAD4	TRMT1L	0.520332	3.87881	3.40223	5.7476	1.41332	0.00413319	0.230544
MEF2A	PSG4	0.169963	2.79734	4.79579	5.7476	1.91742	0.00917416	0.230531
PPARD	MRPL40	-0.586418	2.21185	3.25645	5.7476	1.59413	0.00594132	0.229933
HOXA1	LANCL2	-0.57362	4.38104	4.40008	5.7476	1.28205	0.00282054	0.229819
HOXD8	EVI2A	-0.290139	3.8552	4.04754	1.53962	1.48615	0.0221673	0.229633
HOXC8	CDK2AP1	0.805899	2.26323	3.0182	5.7476	1.48765	0.00487652	0.229539
ERG	CTIF	-0.469559	4.07346	1.85219	5.7476	1.67318	0.00673177	0.229349
TP63	SLC27A3	-0.69343	3.9174	3.9238	5.7476	1.29009	0.00290091	0.229271
IRF1	PDK2	0.531139	2.69805	4.48685	2.0071	1.41124	0.0125872	0.229246
FOXD1	STX4	0.858494	0.54122	3.67583	0.934747	3.13657	0.045763	0.229155
TFAP2A	KCNC3	0.571836	2.12337	5.18679	5.7476	1.43942	0.0043942	0.228955
ETV1	SLC13A3	0.517074	3.80588	3.81062	5.7476	1.38366	0.00383658	0.228804
HOXC9	CYB5R2	0.156075	2.64331	4.65115	5.7476	2.02417	0.0102417	0.22864
HOXB2	FGF1	-0.234243	3.33247	4.16888	1.39119	2.53829	0.0198947	0.228621
FOXD1	SIM1	0.649561	0.54122	4.11539	0.570377	3.39489	0.0815828	0.228556
FOXC2	CYB561D1	0.22349	2.81653	4.65765	5.7476	1.76724	0.00767243	0.228484
GATA2	AP5B1	0.484495	4.25401	4.91592	5.7476	1.30143	0.00301434	0.228452
FOXF2	CAB39L	-0.55595	4.16797	2.03115	5.7476	1.54587	0.00545873	0.228273
HOXC8	USP32	-0.653975	2.26323	3.67112	5.7476	1.4899	0.004899	0.22795
NR3C2	RIF1	-0.261264	3.84273	2.46912	5.7476	1.8591	0.00859103	0.22756
HOXC10	RGS22	-0.339695	3.25038	5.04608	5.7476	1.47964	0.00479642	0.227268
SIX2	YIPF1	-0.177346	3.16677	4.67157	5.7476	1.82531	0.00825309	0.227164
MAFG	PIGB	-0.43324	0.718613	4.14534	5.7476	2.31979	0.0131979	0.227103
NR3C1	KCNJ6	-0.339593	4.27086	5.16374	0.254111	3.84819	0.0309896	0.226952
HOXC10	RAB23	0.514307	3.25038	1.23219	5.7476	1.97198	0.00971978	0.226923
ERG	CCDC65	0.154027	4.07346	4.91619	5.7476	1.73625	0.00736245	0.226626
PITX2	THAP1	0.734279	2.98482	4.99744	5.7476	1.28054	0.0028054	0.226153
TEAD4	RUNX3	0.434591	3.87881	4.86837	2.41252	1.15801	0.00985482	0.22594
HOXC8	ALDH5A1	-0.730188	2.26323	4.90266	0.428269	2.61387	0.0249074	0.225904
TFAP2A	EEPD1	-0.545449	2.12337	4.23663	5.7476	1.52491	0.0052491	0.225744
HOXC6	DKK2	0.140767	1.82263	4.82478	0.861319	3.60944	0.0586001	0.225517
HOXD8	DNAJC6	0.811871	3.8552	1.69257	1.29142	1.06136	0.0310536	0.225487
MAF	TMEM47	-0.260827	0.986989	1.592	5.7476	3.63394	0.0263394	0.225465
IRF1	ULBP2	0.678335	2.69805	4.94442	5.7476	1.32673	0.00326733	0.225462
TFAP2A	ADCY6	0.283377	2.12337	3.36641	2.39316	2.06871	0.0224547	0.225182
PITX2	CXCL3	0.271442	2.98482	5.18743	5.7476	1.58678	0.00586776	0.224917
HOXD8	ZNF552	-0.298701	3.8552	4.9304	5.7476	1.46896	0.00468957	0.224799
PITX2	ZMYM1	0.569506	2.98482	3.73595	5.7476	1.42932	0.00429316	0.22398
NR3C2	ANGPTL2	-0.237254	3.84273	1.59954	1.6956	1.3415	0.0675181	0.223968
HOXC8	PEX5L	0.550662	2.26323	5.06063	0.372314	3.35439	0.0284107	0.223781
FOXC2	ZNF784	0.559482	2.81653	5.08652	5.7476	1.35768	0.00357682	0.223719
TFAP2A	TMED10	0.337821	2.12337	3.99616	5.7476	1.76788	0.00767884	0.223662
TEAD4	TRAF3IP1	0.459697	3.87881	4.03706	5.7476	1.38885	0.00388849	0.223438
HOXC8	GDF5	0.270135	2.26323	5.07427	0.8157	2.43566	0.036212	0.223194
POU5F1	LCA5	0.55064	4.28616	3.79589	5.7476	1.32661	0.00326607	0.223102
HOXC8	EYA1	-0.388759	2.26323	0.5696	2.26496	1.50411	0.13058	0.222944
NFE2	ZNF787	0.481052	4.25408	4.16179	5.7476	1.33979	0.0033979	0.22285
TFAP2A	PCLO	0.322798	2.12337	5.1628	0.589301	2.60822	0.0409695	0.222835
TP63	PLEKHG5	0.524821	3.9174	4.54447	5.7476	1.31525	0.00315253	0.222663
SOX9	HCK	0.46047	3.84371	5.09355	5.7476	1.3241	0.00324105	0.222365
HOXC10	SLC13A3	0.526302	3.25038	3.81062	0.521107	1.98516	0.0329577	0.222251
HOXC8	FRMD6	0.767325	2.26323	2.32887	1.16953	1.44768	0.0324453	0.222173
NR3C2	RFNG	0.13542	3.84273	4.59244	3.55096	1.30937	0.0199936	0.22216
IRF1	RUNX3	0.470312	2.69805	4.86837	1.27416	1.39849	0.0201815	0.222157
PITX2	FOXJ2	-0.697234	2.98482	4.03839	5.7476	1.34224	0.00342236	0.221895
RUNX3	ATP6V1F	0.870481	4.16478	1.58067	5.7476	1.46052	0.00460523	0.221533
SIX2	CD320	-0.215314	3.16677	2.81612	5.7476	2.00234	0.0100234	0.221501
IRF1	ABHD11	0.495119	2.69805	5.01094	5.7476	1.40857	0.00408567	0.221414
SIX4	BBS7	0.294684	3.82692	4.21186	5.7476	1.52984	0.00529838	0.221286
FOSL2	ABLIM3	0.450027	1.4838	4.08036	5.7476	1.78927	0.00789268	0.221156
TFAP2A	ZSWIM8	0.393496	2.12337	3.57393	5.7476	1.74012	0.00740116	0.221044
MEF2A	ZNF449	0.550273	2.79734	4.77984	5.7476	1.37895	0.00378952	0.220982
RFX2	CDKL3	-0.284559	1.13504	4.29668	5.7476	2.23767	0.0123767	0.220905
TP63	FIBIN	0.602044	3.9174	4.03315	0.531332	1.61121	0.0271135	0.220787
MSC	PRR15	0.480073	3.34675	5.16391	5.7476	1.34438	0.00344378	0.220776
TEAD1	COL4A1	0.389148	4.4925	1.87889	5.7476	1.69117	0.00691168	0.220678
PITX2	RTN3	-0.64063	2.98482	3.32706	5.7476	1.42366	0.00423655	0.220541
NR3C2	XKR8	0.223146	3.84273	4.94743	1.98015	1.11617	0.0235083	0.220425
HOXC10	NOLC1	-0.364934	3.25038	4.42332	5.7476	1.49016	0.00490165	0.220273
RUNX3	TYK2	-0.287562	4.16478	4.79207	5.7476	1.45784	0.00457844	0.220171
TEAD4	FOXJ3	-0.431011	3.87881	2.29409	5.7476	1.61715	0.00617152	0.220002
RUNX3	TTI1	0.401827	4.16478	4.35956	5.7476	1.37998	0.00379979	0.219884
TFAP2A	HNRNPR	-0.101824	2.12337	2.92925	5.7476	3.00769	0.0200769	0.21981
SHOX2	DNASE1L1	-0.598324	3.39409	2.52421	5.7476	1.49784	0.00497839	0.219698
FOXD1	EIF3F	-0.63699	0.54122	2.90175	5.7476	2.51734	0.0151734	0.219624
SOX13	SLX4IP	-0.306327	4.13219	2.06931	5.7476	1.80635	0.00806351	0.219283
DLX2	METTL8	0.588758	4.05641	3.22638	5.7476	1.36315	0.00363147	0.219233
EGR3	PAF1	0.654553	3.83046	4.26527	5.7476	1.27864	0.00278645	0.218993
ERF	KDM1B	-0.710601	3.3439	3.398	5.7476	1.34953	0.00349533	0.218907
ATF5	HOXB7	0.28401	2.9446	2.46434	5.7476	1.94839	0.00948392	0.218883
CREB3	SMO	-0.670725	2.15835	4.57166	5.7476	1.40845	0.00408454	0.218833
ESR1	C11orf96	-0.306458	2.03395	2.33001	5.7476	2.19446	0.0119446	0.218803
SIX2	NELFCD	-0.179251	3.16677	4.31988	5.7476	1.84178	0.00841778	0.21851
TFAP2A	ATOH8	-0.448111	2.12337	1.2805	1.57111	1.12878	0.100859	0.217932
NR3C1	MARVELD1	-0.479931	4.27086	2.10021	5.7476	1.56333	0.00563333	0.217902
TFAP2A	SHISA5	0.479364	2.12337	1.42559	5.7476	2.19181	0.0119181	0.217863
NR3C2	LMOD1	-0.192587	3.84273	1.29881	0.558238	2.75671	0.147282	0.217857
FOXD1	ERI1	-0.19531	0.54122	3.94537	5.7476	3.55462	0.0255462	0.217666
NFAT5	CEACAM19	0.626015	4.18173	3.07193	5.7476	1.34902	0.00349018	0.217623
BHLHE41	CLCN4	0.536871	3.08537	4.51013	0.817787	2.10211	0.0169303	0.217433
NR3C2	COLEC12	0.222394	3.84273	5.09953	5.7476	1.55613	0.00556128	0.21677
MAF	MARVELD1	-0.610959	0.986989	2.10021	5.7476	2.29584	0.0129584	0.216555
NPAS2	SYT14	0.290974	2.0864	1.43871	5.7476	2.63552	0.0163552	0.216388
NR3C2	CCDC180	-0.246438	3.84273	4.83691	5.7476	1.53519	0.00535195	0.21631
ETV3	KIAA0319	0.399035	3.87463	5.03156	5.7476	1.35626	0.00356258	0.216042
[truncated: 3,765 more rows]

## Sheet: Individual4_specific_network
TF	TG	corr	-log10P_TF	-log10P_TG	-log10P_Regulation	Fold	Activity	Score
[truncated: 5,867 more rows]
