# Supplementary material for: Osteogenic Differentiation Potential of Mesenchymal Stem Cells Using Single Cell Multiomic Analysis
Source: Genes (Basel). 2023 Sep 26;14(10):1871. doi: 10.3390/genes14101871 (PMC10606235; doi:10.3390/genes14101871)
Supplement: Supplementary file 1 [file genes-14-01871-s001.zip › Table S3.xlsx]

## Sheet: Individual_1
RNA.group	gene	RNA.auc	RNA.padj	motif.group	motif.feature	motif.auc	motif.padj	avg_auc
Individual_1	RUNX2	0.732228	7.63383e-180	Individual_1	MA0511.2	0.658224	2.95249e-77	0.695226
Individual_1	CEBPD	0.52768	0.00729886	Individual_1	MA0836.2	0.725236	9.52895e-155	0.626458
Individual_1	DLX5	0.550684	8.17438e-23	Individual_1	MA1476.1	0.696105	1.36292e-117	0.623394
Individual_1	SOX4	0.679787	2.78065e-101	Individual_1	MA0867.2	0.528158	0.00143241	0.603972
Individual_1	NFIX	0.647387	2.8854e-66	Individual_1	MA0671.1	0.55016	7.42481e-09	0.598773
Individual_1	RUNX3	0.507637	0.0376837	Individual_1	MA0684.2	0.66696	1.18314e-85	0.587298
Individual_1	HOXA5	0.594687	3.1427e-50	Individual_1	MA0158.2	0.565564	2.78639e-14	0.580125
Individual_1	HOXB7	0.542354	2.51203e-11	Individual_1	MA1501.1	0.61248	1.15064e-39	0.577417
Individual_1	HOXA10	0.555627	5.55235e-12	Individual_1	MA0899.1	0.595838	3.78232e-29	0.575732
Individual_1	HOXB3	0.581661	2.57994e-33	Individual_1	MA0903.1	0.56716	6.3147e-15	0.574411
Individual_1	HOXB8	0.517408	5.43186e-09	Individual_1	MA1502.1	0.629305	4.4269e-52	0.573356
Individual_1	HOXA6	0.529351	6.63903e-13	Individual_1	MA1497.1	0.604033	4.06411e-34	0.566692
Individual_1	HOXA7	0.534982	2.09222e-08	Individual_1	MA1498.1	0.596271	2.1438e-29	0.565627
Individual_1	NFATC2	0.520134	0.000602596	Individual_1	MA0152.1	0.607845	1.48221e-36	0.56399
Individual_1	EN1	0.544236	8.77192e-24	Individual_1	MA0027.2	0.575932	9.69097e-19	0.560084
Individual_1	HOXA2	0.510307	9.50708e-06	Individual_1	MA0900.2	0.600967	3.29115e-32	0.555637
Individual_1	HOXB6	0.532477	5.08579e-09	Individual_1	MA1500.1	0.578368	7.20738e-20	0.555422
Individual_1	ATF4	0.53184	0.00144122	Individual_1	MA0833.2	0.578958	3.74749e-20	0.555399
Individual_1	EGR1	0.53794	7.35154e-05	Individual_1	MA0162.4	0.564856	5.26668e-14	0.551398
Individual_1	DLX6	0.525707	1.17307e-11	Individual_1	MA0882.1	0.571353	1.11639e-16	0.54853
Individual_1	HOXB9	0.508444	0.000258864	Individual_1	MA1503.1	0.571251	1.22923e-16	0.539847
Individual_1	NFYB	0.531891	0.000110184	Individual_1	MA0502.2	0.542512	1.05303e-06	0.537202
Individual_1	GLI2	0.530091	0.00071307	Individual_1	MA0734.2	0.542076	1.35927e-06	0.536083
Individual_1	MAF	0.547519	3.45857e-11	Individual_1	MA1520.1	0.522306	0.0125786	0.534912
Individual_1	NKX6-1	0.507943	0.00196772	Individual_1	MA0674.1	0.560988	1.5899e-12	0.534466
Individual_1	EGR2	0.527435	2.26535e-11	Individual_1	MA0472.2	0.540818	2.84306e-06	0.534126
Individual_1	MAZ	0.534714	6.61165e-05	Individual_1	MA1522.1	0.528124	0.00144906	0.531419
Individual_1	REST	0.524835	0.0172614	Individual_1	MA0138.2	0.53344	0.000137627	0.529137
Individual_1	EGR3	0.515287	3.62007e-07	Individual_1	MA0732.1	0.542183	1.27685e-06	0.528735
Individual_1	TCF7	0.519941	3.59731e-05	Individual_1	MA0769.2	0.521882	0.0145079	0.520912
Individual_1	HOXA4	0.511099	0.00229276	Individual_1	MA1496.1	0.519055	0.0346863	0.515077

## Sheet: Individual_2
RNA.group	gene	RNA.auc	RNA.padj	motif.group	motif.feature	motif.auc	motif.padj	avg_auc
Individual_2	EBF1	0.65302	6.81771e-62	Individual_2	MA0154.4	0.562706	2.70813e-11	0.607863
Individual_2	NFIA	0.60358	5.92369e-33	Individual_2	MA0670.1	0.556303	2.31536e-09	0.579942
Individual_2	FOXC1	0.595425	2.28444e-25	Individual_2	MA0032.2	0.549273	1.89148e-07	0.572349
Individual_2	NR2F2	0.590573	5.10748e-25	Individual_2	MA1111.1	0.54826	3.39008e-07	0.569416
Individual_2	NFIC	0.557282	5.77392e-09	Individual_2	MA0161.2	0.569415	1.52764e-13	0.563349
Individual_2	EBF3	0.554978	5.35596e-09	Individual_2	MA1637.1	0.557438	1.08931e-09	0.556208
Individual_2	NFIX	0.560515	5.93069e-10	Individual_2	MA0671.1	0.550436	9.43479e-08	0.555476
Individual_2	CEBPD	0.524294	0.0392866	Individual_2	MA0836.2	0.54274	6.91516e-06	0.533517
Individual_2	RFX3	0.528198	0.00524866	Individual_2	MA0798.2	0.526847	0.00535907	0.527522
Individual_2	HOXD9	0.512175	0.000291788	Individual_2	MA0913.2	0.537854	7.37194e-05	0.525015
Individual_2	CEBPB	0.526305	0.0211271	Individual_2	MA0466.2	0.522727	0.018587	0.524516
Individual_2	NR4A2	0.520276	0.0102559	Individual_2	MA0160.1	0.524606	0.0107633	0.522441
Individual_2	CEBPA	0.507055	0.0069915	Individual_2	MA0102.4	0.536872	0.000114555	0.521963

## Sheet: Individual_3
RNA.group	gene	RNA.auc	RNA.padj	motif.group	motif.feature	motif.auc	motif.padj	avg_auc
Individual_3	SHOX	0.73939	0	Individual_3	MA0630.1	0.524414	0.0092828	0.631902
Individual_3	FOSL1	0.535686	1.84395e-05	Individual_3	MA0477.2	0.6971	2.72322e-112	0.616393
Individual_3	FOSL2	0.531354	0.00113022	Individual_3	MA0478.1	0.690056	3.14646e-105	0.610705
Individual_3	MEIS2	0.656109	2.46885e-73	Individual_3	MA0774.1	0.559082	3.97807e-11	0.607595
Individual_3	FOXC2	0.582448	2.42749e-30	Individual_3	MA0846.1	0.618957	7.96348e-42	0.600703
Individual_3	PRRX1	0.650807	9.91858e-66	Individual_3	MA0716.1	0.524414	0.0092828	0.58761
Individual_3	PBX2	0.519574	0.00344568	Individual_3	MA1113.2	0.649496	1.64102e-65	0.584535
Individual_3	IRF1	0.53936	2.11402e-08	Individual_3	MA0050.2	0.62337	6.56154e-45	0.581365
Individual_3	GABPA	0.519542	0.0346659	Individual_3	MA0062.3	0.640793	3.22316e-58	0.580167
Individual_3	PITX1	0.582226	3.18522e-45	Individual_3	MA0682.2	0.57006	3.19194e-15	0.576143
Individual_3	HIF1A	0.626453	4.63973e-46	Individual_3	MA1106.1	0.520052	0.0344319	0.573253
Individual_3	PITX2	0.56049	4.32995e-25	Individual_3	MA1547.1	0.582532	1.13937e-20	0.571511
Individual_3	FOXK2	0.519507	0.0484803	Individual_3	MA1103.2	0.622991	1.20085e-44	0.571249
Individual_3	FOXP2	0.508729	0.000706117	Individual_3	MA0593.1	0.632598	9.71987e-52	0.570664
Individual_3	FLI1	0.572202	1.58345e-20	Individual_3	MA0475.2	0.567634	2.98544e-14	0.569918
Individual_3	NR2F1	0.552908	1.80861e-22	Individual_3	MA0017.2	0.577569	2.2143e-18	0.565239
Individual_3	PBX1	0.588603	1.69301e-33	Individual_3	MA0070.1	0.541259	5.66316e-06	0.564931
Individual_3	FOXK1	0.526368	0.00572342	Individual_3	MA0852.2	0.601152	1.58812e-30	0.56376
Individual_3	FOXD1	0.520036	0.0490591	Individual_3	MA0031.1	0.607172	3.73153e-34	0.563604
Individual_3	ZNF135	0.53101	7.83468e-07	Individual_3	MA1587.1	0.593344	3.7591e-26	0.562177
Individual_3	FOXF2	0.514115	0.000450422	Individual_3	MA0030.1	0.607164	3.73153e-34	0.56064
Individual_3	ETV5	0.555064	1.31263e-12	Individual_3	MA0765.2	0.563169	1.46836e-12	0.559116
Individual_3	ETS1	0.527886	0.00404903	Individual_3	MA0098.3	0.588838	8.78684e-24	0.558362
Individual_3	ZNF460	0.529611	4.48838e-06	Individual_3	MA1596.1	0.585382	4.86765e-22	0.557497
Individual_3	MEIS3	0.555059	3.82659e-13	Individual_3	MA0775.1	0.559802	2.28558e-11	0.557431
Individual_3	IRF3	0.531297	5.92329e-05	Individual_3	MA1418.1	0.580985	6.05999e-20	0.556141
Individual_3	MAFG	0.540176	8.74315e-06	Individual_3	MA0659.2	0.572024	5.09449e-16	0.5561
Individual_3	IRF9	0.521311	0.000674536	Individual_3	MA0653.1	0.590356	1.44713e-24	0.555833
Individual_3	FOXD2	0.506338	0.0122675	Individual_3	MA0847.2	0.594019	1.62804e-26	0.550178
Individual_3	ELK3	0.548948	9.05032e-11	Individual_3	MA0759.1	0.54814	9.61717e-08	0.548544
Individual_3	ZEB1	0.574473	2.81934e-16	Individual_3	MA0103.3	0.522472	0.0170942	0.548472
Individual_3	PPARD	0.523792	0.00883405	Individual_3	MA1550.1	0.568371	1.52816e-14	0.546082
Individual_3	MEIS1	0.540028	3.42285e-07	Individual_3	MA0498.2	0.549551	3.91511e-08	0.54479
Individual_3	NFKB1	0.531244	0.000900597	Individual_3	MA0105.4	0.553859	2.00691e-09	0.542551
Individual_3	GLIS1	0.5557	7.97651e-19	Individual_3	MA0735.1	0.528932	0.00182153	0.542316
Individual_3	PBX3	0.554016	5.44665e-09	Individual_3	MA1114.1	0.530534	0.000974379	0.542275
Individual_3	HES1	0.551731	3.28461e-13	Individual_3	MA1099.2	0.528611	0.00206601	0.540171
Individual_3	ZKSCAN5	0.51885	0.00348133	Individual_3	MA1652.1	0.560202	1.66177e-11	0.539526
Individual_3	NFKB2	0.514052	0.0185454	Individual_3	MA0778.1	0.562292	3.05089e-12	0.538172
Individual_3	REL	0.519589	0.00265584	Individual_3	MA0101.1	0.555255	7.2763e-10	0.537422
Individual_3	MAF	0.53471	6.30172e-06	Individual_3	MA1520.1	0.538874	2.02418e-05	0.536792
Individual_3	MEF2C	0.542025	1.45116e-10	Individual_3	MA0497.1	0.531321	0.000704294	0.536673
Individual_3	THRB	0.511272	0.0279065	Individual_3	MA1574.1	0.560982	8.93345e-12	0.536127
Individual_3	ZNF384	0.514663	0.0236933	Individual_3	MA1125.1	0.556967	2.04364e-10	0.535815
Individual_3	CREB3L1	0.54119	1.87062e-05	Individual_3	MA0839.1	0.525968	0.00546318	0.533579
Individual_3	VDR	0.536695	9.38489e-07	Individual_3	MA0693.2	0.527317	0.00340218	0.532006
Individual_3	TBX3	0.538296	3.10442e-11	Individual_3	MA1566.1	0.523524	0.0123485	0.53091
Individual_3	ESR1	0.53435	3.03424e-06	Individual_3	MA0112.3	0.52607	0.00530478	0.53021
Individual_3	TFDP1	0.518928	0.04634	Individual_3	MA1122.1	0.539507	1.48519e-05	0.529218
Individual_3	ETV3	0.518578	0.0012306	Individual_3	MA0763.1	0.539373	1.59165e-05	0.528975
Individual_3	BHLHE41	0.519613	0.00141972	Individual_3	MA0636.1	0.537704	3.71484e-05	0.528658
Individual_3	YY1	0.523508	0.0304515	Individual_3	MA0095.2	0.533713	0.000243816	0.528611
Individual_3	E2F6	0.514312	0.0295867	Individual_3	MA0471.2	0.541527	4.9463e-06	0.52792
Individual_3	POU6F2	0.512844	4.22608e-08	Individual_3	MA0793.1	0.541837	4.19578e-06	0.52734
Individual_3	ZNF263	0.522871	0.00194663	Individual_3	MA0528.2	0.530625	0.000940206	0.526748
Individual_3	SREBF1	0.521624	0.00532732	Individual_3	MA0595.1	0.531094	0.000776234	0.526359
Individual_3	TFAP2A	0.53009	6.38233e-08	Individual_3	MA0003.4	0.522402	0.0173967	0.526246
Individual_3	NFIB	0.52739	0.000706767	Individual_3	MA1643.1	0.523988	0.0107079	0.525689
Individual_3	HNF1B	0.5023	0.0351532	Individual_3	MA0153.2	0.54829	8.80682e-08	0.525295
Individual_3	RFX7	0.521927	0.0480311	Individual_3	MA1554.1	0.525991	0.00543253	0.523959
Individual_3	TBX4	0.50234	7.29674e-05	Individual_3	MA0806.1	0.544986	6.94647e-07	0.523663
Individual_3	ESRRA	0.51212	0.0415154	Individual_3	MA0592.3	0.53412	0.000202223	0.52312
Individual_3	PKNOX1	0.522626	0.0170753	Individual_3	MA0782.2	0.522723	0.0159759	0.522675
Individual_3	CENPB	0.518995	0.0397497	Individual_3	MA0637.1	0.524694	0.0085454	0.521844
Individual_3	KLF3	0.521755	0.0376618	Individual_3	MA1516.1	0.52028	0.0323265	0.521017
Individual_3	ZNF740	0.51329	0.0290942	Individual_3	MA0753.2	0.527676	0.00299922	0.520483
Individual_3	OSR1	0.521002	2.0435e-05	Individual_3	MA1542.1	0.518896	0.0470636	0.519949
Individual_3	ESR2	0.50609	0.00318005	Individual_3	MA0258.2	0.530103	0.00116617	0.518096
Individual_3	LBX2	0.507125	0.00322886	Individual_3	MA0699.1	0.522233	0.0183069	0.514679
Individual_3	HES2	0.502531	0.0105488	Individual_3	MA0616.2	0.521324	0.0240411	0.511928

## Sheet: Individual_4
RNA.group	gene	RNA.auc	RNA.padj	motif.group	motif.feature	motif.auc	motif.padj	avg_auc
Individual_4	GATA6	0.609644	1.2493e-46	Individual_4	MA1104.2	0.758706	2.33201e-181	0.684175
Individual_4	JUN	0.569668	1.8867e-13	Individual_4	MA0488.1	0.711934	5.9294e-122	0.640801
Individual_4	MEF2A	0.591579	6.85026e-23	Individual_4	MA0052.4	0.624332	1.11392e-42	0.607955
Individual_4	TEAD3	0.551714	1.95398e-13	Individual_4	MA0808.1	0.656469	7.062e-67	0.604092
Individual_4	MEF2D	0.555197	1.41108e-10	Individual_4	MA0773.1	0.641666	5.18493e-55	0.598432
Individual_4	MEF2B	0.516628	0.0161505	Individual_4	MA0660.1	0.66243	6.04324e-72	0.589529
Individual_4	TFAP2A	0.582615	3.14421e-53	Individual_4	MA0003.4	0.5853	1.12736e-20	0.583957
Individual_4	ATF3	0.540811	2.41312e-10	Individual_4	MA0605.2	0.624341	1.11392e-42	0.582576
Individual_4	ZEB1	0.584864	8.8614e-20	Individual_4	MA0103.3	0.571748	5.10212e-15	0.578306
Individual_4	PBX3	0.582083	6.51768e-19	Individual_4	MA1114.1	0.553681	5.90095e-09	0.567882
Individual_4	SREBF2	0.565065	7.70569e-14	Individual_4	MA0596.1	0.567966	1.32664e-13	0.566516
Individual_4	TBX18	0.601752	9.4096e-32	Individual_4	MA1565.1	0.522169	0.0194324	0.56196
Individual_4	FLI1	0.549608	2.34052e-09	Individual_4	MA0475.2	0.561147	2.97542e-11	0.555377
Individual_4	ETV6	0.534685	0.000916145	Individual_4	MA0645.1	0.567895	1.38275e-13	0.55129
Individual_4	GLIS3	0.579666	7.35088e-18	Individual_4	MA0737.1	0.522091	0.0198645	0.550878
Individual_4	ELF3	0.502641	0.00641023	Individual_4	MA0640.2	0.597789	7.60483e-27	0.550215
Individual_4	ETV5	0.542262	3.48346e-07	Individual_4	MA0765.2	0.54949	8.40847e-08	0.545876
Individual_4	TGIF1	0.536249	3.2382e-05	Individual_4	MA0796.1	0.545732	7.95076e-07	0.540991
Individual_4	TBX15	0.539088	1.86532e-07	Individual_4	MA0803.1	0.540107	1.57596e-05	0.539597
Individual_4	ERF	0.51801	0.0451738	Individual_4	MA0760.1	0.557865	3.34365e-10	0.537937
Individual_4	HSF1	0.523073	0.0275796	Individual_4	MA0486.2	0.552155	1.59901e-08	0.537614
Individual_4	NR2F1	0.533975	5.55947e-09	Individual_4	MA0017.2	0.541023	1.00438e-05	0.537499
Individual_4	PPARD	0.532906	0.000231576	Individual_4	MA1550.1	0.539553	2.08087e-05	0.536229
Individual_4	PKNOX2	0.530566	1.15249e-15	Individual_4	MA0783.1	0.540527	1.28062e-05	0.535546
Individual_4	SREBF1	0.518345	0.0375622	Individual_4	MA0595.1	0.550086	5.81355e-08	0.534216
Individual_4	FOSL2	0.537612	0.000119287	Individual_4	MA0478.1	0.526827	0.00434956	0.532219
Individual_4	JUND	0.543989	9.10755e-06	Individual_4	MA0491.2	0.519877	0.0369317	0.531933
Individual_4	TCF7L1	0.532551	0.00195163	Individual_4	MA1421.1	0.528236	0.00267391	0.530394
Individual_4	MSC	0.533236	1.93093e-07	Individual_4	MA0665.1	0.52395	0.0113514	0.528593
Individual_4	ZBTB18	0.52136	0.000431821	Individual_4	MA0698.1	0.530417	0.00120471	0.525888
Individual_4	GSC	0.516204	2.11081e-12	Individual_4	MA0648.1	0.532359	0.000556698	0.524281
Individual_4	ZNF382	0.519419	0.000751432	Individual_4	MA1594.1	0.527479	0.00347774	0.523449
Individual_4	PITX1	0.518695	0.0111478	Individual_4	MA0682.2	0.527517	0.00343757	0.523106
