# Supplementary figures and images for: Osteogenic Differentiation Potential of Mesenchymal Stem Cells Using Single Cell Multiomic Analysis
Source: MDPI journal article supplement (doi:10.3390/genes14101871), 2023-09-26

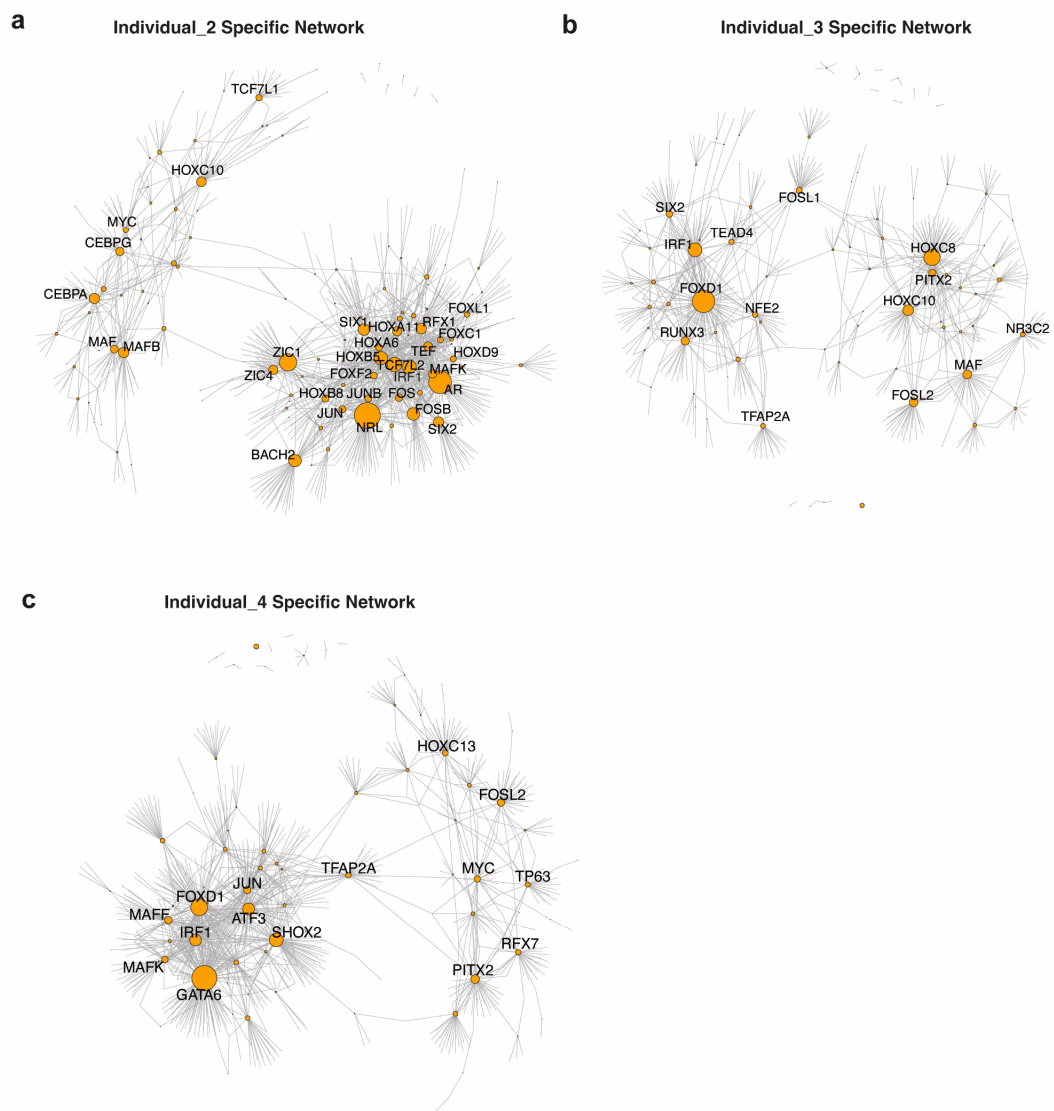

**Figure S1.**

Supplement: s1 [file s1]
